# Supplementary material for: Modulation of sleep by trafficking of lipids through the Drosophila blood-brain barrier
Source: eLife. 2023 May 4;12:e86336. doi: 10.7554/eLife.86336 (PMC10205086; doi:10.7554/eLife.86336)
Supplement: Figure 1—figure supplement 1—source data 1. [file elife-86336-fig1-figsupp1-data1.xlsx]

## Sheet: Sheet1
	Final Reported Result (pmol/mg wet flies)
Genetic Background	C02	C03	C04 Butyryl	C04 Isobutyryl	C04-DC Succinyl	C04-OH Butyryl	C04-OH Isobutyryl	C05 Valeryl	C06	C06-OH	C08	C10	C12	C12:1	C12-OH	C14	C14:1	C14:1-OH	C14-OH	C16	C16:1	C16:1-OH	C16:2	C16-OH	C18	C18:1	C18:1-OH	C18:2	C18:2-OH	C18-OH	C20	C20:1	C20:2	C22
RepoGal4/+	319.937	47.841	0.242434	0.705277	0.122634	0.0325399	0.314103	0.0794333	0.115409	0.0356877	0.0865845	0.163219	1.35115	0.169624	0.0343983	2.40774	0.452735	0.0283065	0.131962	0.815728	6.25195	0.100465	0.0375505	0.0638207	0.432507	8.99123	0.242459	14.937	0.0316715	0.0771593	0.121912	0.0652635	0.0391036	0.0256279
RepoGal4/+	196.252	46.7734	0.333614	0.964908	0.183242	0.0505325	0.400088	0.0669106	0.0931855	BLOQ	0.139967	0.151238	1.50462	0.191697	0.0497409	2.38819	0.45494	0.0314408	0.110705	0.956592	7.40063	0.11298	0.0515477	0.054429	0.437649	12.3565	0.194774	10.4699	0.0269873	0.0732646	0.165846	0.0507837	0.0766729	0.0319003
RepoGal4/+	225.291	43.502	0.371284	0.607089	0.0882795	0.0343656	0.362367	0.0768395	0.0762191	BLOQ	0.0848223	0.173495	0.879819	0.0945675	0.0445435	1.28146	0.290916	0.0316321	0.172614	0.652499	3.64088	0.0993213		0.0555934	0.374408	9.44706	0.120403	9.34416	0.0339559	0.0596755	0.107306	0.0413826	0.0545268	0.0405478
RepoGal4/+	159.051	44.1568	0.326794	0.637717	0.115048	0.0531666	0.559025	0.0916852	0.133311	0.0280616	0.13159	0.222086	1.85192	0.154487	0.0460991	2.26038	0.298234	0.0293768	0.141857	0.634896	4.73287	0.0921897	0.0365602	0.0431503	0.40506	9.00778	0.126685	10.6536	0.0478443	0.0666225	0.246829	0.0505668	0.0983144	0.075714
RepoGal4/+	209.95	34.1082	0.266528	0.403598	0.105901	0.0333686	0.282077	0.0790383	0.0965533	0.025007	0.0753824	0.124612	1.13835	0.0962877	0.0569459	1.13235	0.329311	0.0283401	0.140912	0.383604	3.41554	0.0822308	0.0215642	0.0430748	0.298903	7.28028	0.192948	8.01001	0.0306955	0.0768052	0.170665	0.0390456	0.0443484	0.0428658
RepoGal4/Shi	233.483	31.7676	0.659548	1.04429	0.123878	0.0837428	0.888835	0.0831755	0.115376	0.0358431	0.119263	0.193489	1.87699	0.141637	0.0917781	3.76046	0.441433	0.0624186	0.233291	2.02678	10.3215	0.117443	0.0674867	0.0747431	0.520194	10.8544	0.205247	13.823	0.0304039	0.0881016	0.186984	0.0745041	0.0898114	0.0362882
RepoGal4/Shi	379.016	25.1245	0.496879	0.923971	0.122782	0.0874578	0.95553	0.0381155	0.103012	0.0301963	0.116404	0.179968	1.49844	0.170351	0.0421576	6.10371	0.572968	0.0547063	0.23288	2.40404	11.2423	0.156637	0.0920448	0.101792	0.405933	14.1778	0.14214	11.1589	0.0271099	0.0566655	0.213342	0.0474528	0.108931	0.0770341
RepoGal4/Shi	253.165	30.9029	0.430701	1.16382	0.16927	0.0796234	0.895533	0.0642542	0.1469	0.0523471	0.0864643	0.147738	0.982728	0.10179	0.0826157	1.41118	0.30268	0.0735078	0.194631	0.547038	4.14232	0.144479	0.0241968	0.0645372	0.269954	6.21835	0.230544	10.3195	0.0385255	0.0879832	0.184786	0.0392368	0.0354721	0.0605816
RepoGal4/Shi	290.657	21.7256	0.634018	1.45257	0.124316	0.0981228	1.06137	0.0468713	0.106637	0.0309771	0.0928579	0.138395	1.06162	0.0975406	0.0859641	1.34965	0.298516	0.0390505	0.209587	0.516897	3.83333	0.109629	0.0269068	0.0585842	0.387981	6.83361	0.193775	8.82919	0.0281961	0.0730081	0.194331	0.0444844	0.040415	0.0486311
RepoGal4/Shi	315.629	61.656	0.562219	1.0478	0.092173	0.0949295	0.774146	0.0939542	0.193275	0.0564163	0.162252	0.206839	1.86414	0.114594	0.109538	1.97213	0.42368	0.0721533	0.251353	0.800795	3.41311	0.134333	0.0221294	0.0752547	0.554078	11.0244	0.296873	13.756	0.0491193	0.11435	0.281774	0.0576982	0.0512721	0.059481
Shi/+	318.398	50.0795	0.323889	0.575671	0.0807004	0.0502505	0.547599	0.186467	0.100671	BLOQ	0.11445	0.171023	1.84583	0.142501	0.0340313	4.44731	0.536286	0.0234342	0.116332	1.98927	12.2926	0.114659		0.0587427	0.530449	28.1701	0.152766	20.4316	0.0416532	0.0707505	0.211814	0.070587	0.146963	0.081551
Shi/+	238.04	115.944	0.259825	0.594073	0.0827834	0.0424202	0.382694	0.136817	0.0951561	BLOQ	0.130468	0.117317	1.0246	0.141654	0.0609878	1.34158	0.285621	0.0297894	0.137964	0.639293	2.79729	0.081857	0.0244742	0.0482847	0.366575	7.56648	0.143433	6.97479	0.0224322	0.0771065	0.145963	0.0326697	0.0357335	0.0351794
Shi/+	226.639	34.7142	0.343912	0.749488	0.114247	0.0539794	0.480072	0.115776	0.122084	0.0291115	0.132543	0.186992	1.39407	0.147168	0.0469692	1.88422	0.273984	0.0309563	0.114527	0.498329	3.8559	0.0838264	0.0259641	0.0487372	0.411305	8.70667	0.210092	8.33522	0.0408629	0.076952	0.158173	0.0332891	0.0502072	0.0401236
Shi/+	269.924	25.1148	0.330758	0.58302	0.163739	0.0625523	0.581457	0.102467	0.124089	0.0301591	0.0811493	0.130555	1.72726	0.217804	0.0651861	1.90205	0.346604	0.0384357	0.160956	0.821097	5.3724	0.0807091	0.03331	0.0605678	0.416482	12.4529	0.138099	8.38691	0.0383452	0.0599762	0.13619	0.0428293	0.0428194	0.0309244
Shi/+	316.398	39.2	0.302876	0.536027	0.0979365	0.0445026	0.54899	0.0541068	0.0825484	0.0366777	0.0900907	0.12975	1.54463	0.159067	0.0484791	4.17312	0.508602	0.0272381	0.188163	1.95392	10.5756	0.117788	0.0558784	0.0651305	0.367912	15.666	0.180707	9.29158	0.0303858	0.0667015	0.179903	0.0673921	0.0532925	0.0433366
