# Supplementary material for: Modulation of sleep by trafficking of lipids through the Drosophila blood-brain barrier
Source: eLife. 2023 May 4;12:e86336. doi: 10.7554/eLife.86336 (PMC10205086; doi:10.7554/eLife.86336)
Supplement: Figure 1—source data 1. [file elife-86336-fig1-data1.xlsx]

## Sheet: Sheet1
C2
	Gal4 Ctrl	Gal4 >UAS	UAS Ctrl
	4258824	26579772	7437828
	6473667	29612952	14076481
	5328954	36258376	7702993
	7542334	9902693	6350498
	3376456	12322461	7261514
C16
	Gal4 Ctrl	Gal4 >UAS	UAS Ctrl
	4441842	27472316	16773554
	5505380	27471370	20300286
	6830530	28772168	16412082
	4665858	21152992	10581300
	7388334	25418154	10952722
C16:1
	Gal4 Ctrl	Gal4 >UAS	UAS Ctrl
	120742	2769434	270766
	70527	2255771	207886
	128933	4367796	253326
		1002600	356539
		1551319
C17
	Gal4 Ctrl	Gal4 >UAS	UAS Ctrl
	64284	195093	187196
	144113	245843	183985
	107440	341697	204288
		322855	298000
		400018	152766
C18
	Gal4 Ctrl	Gal4 >UAS	UAS Ctrl
	1681116	3494305	3368735
	2324175	3595092	3520538
	2769335	3758271	3347264
	2708193	3588572	3932992
	3237440	3733429	2925061
C18:1
	Gal4 Ctrl	Gal4 >UAS	UAS Ctrl
	1916887	16998172	10711235
	5411037	20517176	11081230
	5373714	22010326	10131617
	4582095	12397016	8386983
	4740195	16241615	5490248
C18:2
	Gal4 Ctrl	Gal4 >UAS	UAS Ctrl
	416130	3431461	782482
	617818	3546582	1636605
	515823	4236907	977878
	312151	1636775	634472
	407609	2520323	858172
C20
	Gal4 Ctrl	Gal4 >UAS	UAS Ctrl
	1577637	2271112	2155385
	1519200	1939734	1874739
	1474182	2249284	1486999
	1240819	1233192	1240931
	1367907	1528244	1099560
C20:1
	Gal4 Ctrl	Gal4 >UAS	UAS Ctrl
	51533	162105	123399
	86960	169996	168576
	190226	405893	136873
	93350	170177	271176
		170541	167222
C22
	Gal4 Ctrl	Gal4 >UAS	UAS Ctrl
	822440	1066787	1282096
	913215	1313602	1166220
	967733	1348544	1146680
	943867	1170851	1026848
	1016207	1205119	993721
C24
	Gal4 Ctrl	Gal4 >UAS	UAS Ctrl
	1976443	1477105	2070786
	2463018	1792422	2053613
	2421179	1815084	2057283
	2463072	1722099	2280801
	2779540	1914674	2045948
C24:1
	Gal4 Ctrl	Gal4 >UAS	UAS Ctrl
	152352	238075	269336
	137038	257373	301307
	230254	668153	455338
	334960	924218	687713
	375805	817391	583056
C26
	Gal4 Ctrl	Gal4 >UAS	UAS Ctrl
	81925	79914	87909
	115912	93845	91567
	103689	139052	98836
	124116	81119	103679
	127106		99994
C26:1
	Gal4 Ctrl	Gal4 >UAS	UAS Ctrl
	157567	121011	139999
	168065	127362	187493
	178670	145317	123696
	172990	105745	164608
	190115	148426	119520
deoxycarnitine
	Gal4 Ctrl	Gal4 >UAS	UAS Ctrl
	100500	197095	185961
	121565	404028	339867
	256653	283698	175495
	89907	188356	136411
			160522
carnitine
	Gal4 Ctrl	Gal4 >UAS	UAS Ctrl
	24376100	54504672	49072512
	32863608	54013552	54580888
	33557864	50951348	46859388
	30363952	47067632	49737628
	35389236	46797100	49364960
