# Supplementary material for: Modulation of sleep by trafficking of lipids through the Drosophila blood-brain barrier
Source: eLife. 2023 May 4;12:e86336. doi: 10.7554/eLife.86336 (PMC10205086; doi:10.7554/eLife.86336)
Supplement: Figure 2—figure supplement 1—source data 1. [file elife-86336-fig2-figsupp1-data1.xlsx]

## Sheet: Sheet1
GAL4 Control	Total Sleep		UAS Control	Total Sleep		GAL4 x UAS	Total Sleep
;UAS-Dicer; repoGS/+ (F)	540.25		;;UAS- KK 44104/+ (F)	995.25		;UAS-Dicer; UAS- KK 44104/repoGS (F)	775.25
;UAS-Dicer; repoGS/+ (F)	940.5		;;UAS- KK 44104/+ (F)	726.25		;UAS-Dicer; UAS- KK 44104/repoGS (F)	660.5
;UAS-Dicer; repoGS/+ (F)	479.25		;;UAS- KK 44104/+ (F)	980.5		;UAS-Dicer; UAS- KK 44104/repoGS (F)	837.75
;UAS-Dicer; repoGS/+ (F)	531		;;UAS- KK 44104/+ (F)	665.75		;UAS-Dicer; UAS- KK 44104/repoGS (F)	534
;UAS-Dicer; repoGS/+ (F)	579.25		;;UAS- KK 44104/+ (F)	865.5		;UAS-Dicer; UAS- KK 44104/repoGS (F)	523
;UAS-Dicer; repoGS/+ (F)	691.5		;;UAS- KK 44104/+ (F)	780.75		;UAS-Dicer; UAS- KK 44104/repoGS (F)	514.5
;UAS-Dicer; repoGS/+ (F)	746.75		;;UAS- KK 44104/+ (F)	861.75		;UAS-Dicer; UAS- KK 44104/repoGS (F)	640.75
;UAS-Dicer; repoGS/+ (F)	656		;;UAS- KK 44104/+ (F)	940.75		;UAS-Dicer; UAS- KK 44104/repoGS (F)	910.5
;UAS-Dicer; repoGS/+ (F)	928.5		;;UAS- KK 44104/+ (F)	932.5		;UAS-Dicer; UAS- KK 44104/repoGS (F)	528.5
;UAS-Dicer; repoGS/+ (F)	971.75		;;UAS- KK 44104/+ (F)	934.5		;UAS-Dicer; UAS- KK 44104/repoGS (F)	667
;UAS-Dicer; repoGS/+ (F)	927.75		;;UAS- KK 44104/+ (F)	879.5		;UAS-Dicer; UAS- KK 44104/repoGS (F)	495.25
;UAS-Dicer; repoGS/+ (F)	467.25		;;UAS- KK 44104/+ (F)	965.75		;UAS-Dicer; UAS- KK 44104/repoGS (F)	426
;UAS-Dicer; repoGS/+ (F)	420.75		;;UAS- KK 44104/+ (F)	677.75		;UAS-Dicer; UAS- KK 44104/repoGS (F)	600.25
;UAS-Dicer; repoGS/+ (F)	667.5		;;UAS- KK 44104/+ (F)	843.75		;UAS-Dicer; UAS- KK 44104/repoGS (F)	811.75
;UAS-Dicer; repoGS/+ (F)	862.75		;;UAS- KK 44104/+ (F)	753.25		;UAS-Dicer; UAS- KK 44104/repoGS (F)	846
;UAS-Dicer; repoGS/+ (F)	711.75					;UAS-Dicer; UAS- KK 44104/repoGS (F)	1033
;UAS-Dicer; repoGS/+ (F)	540.25		;UAS- KK 104488/+; (F)	867.75		;UAS- KK 104488/UAS-Dicer; repoGS/+ (F)	716
;UAS-Dicer; repoGS/+ (F)	940.5		;UAS- KK 104488/+; (F)	1025.5		;UAS- KK 104488/UAS-Dicer; repoGS/+ (F)	662.25
;UAS-Dicer; repoGS/+ (F)	479.25		;UAS- KK 104488/+; (F)	1002.75		;UAS- KK 104488/UAS-Dicer; repoGS/+ (F)	832
;UAS-Dicer; repoGS/+ (F)	531		;UAS- KK 104488/+; (F)	984.75		;UAS- KK 104488/UAS-Dicer; repoGS/+ (F)	715
;UAS-Dicer; repoGS/+ (F)	579.25		;UAS- KK 104488/+; (F)	1009.25		;UAS- KK 104488/UAS-Dicer; repoGS/+ (F)	808.75
;UAS-Dicer; repoGS/+ (F)	691.5		;UAS- KK 104488/+; (F)	864.5		;UAS- KK 104488/UAS-Dicer; repoGS/+ (F)	726.75
;UAS-Dicer; repoGS/+ (F)	746.75		;UAS- KK 104488/+; (F)	907.5		;UAS- KK 104488/UAS-Dicer; repoGS/+ (F)	669.25
;UAS-Dicer; repoGS/+ (F)	656		;UAS- KK 104488/+; (F)	833		;UAS- KK 104488/UAS-Dicer; repoGS/+ (F)	769
;UAS-Dicer; repoGS/+ (F)	928.5		;UAS- KK 104488/+; (F)	916		;UAS- KK 104488/UAS-Dicer; repoGS/+ (F)	850.75
;UAS-Dicer; repoGS/+ (F)	971.75		;UAS- KK 104488/+; (F)	606.5		;UAS- KK 104488/UAS-Dicer; repoGS/+ (F)	813.5
;UAS-Dicer; repoGS/+ (F)	927.75		;UAS- KK 104488/+; (F)	934.75		;UAS- KK 104488/UAS-Dicer; repoGS/+ (F)	897.75
;UAS-Dicer; repoGS/+ (F)	467.25		;UAS- KK 104488/+; (F)	846		;UAS- KK 104488/UAS-Dicer; repoGS/+ (F)	868.25
;UAS-Dicer; repoGS/+ (F)	420.75		;UAS- KK 104488/+; (F)	953		;UAS- KK 104488/UAS-Dicer; repoGS/+ (F)	1148.75
;UAS-Dicer; repoGS/+ (F)	667.5		;UAS- KK 104488/+; (F)	716.75		;UAS- KK 104488/UAS-Dicer; repoGS/+ (F)	813.75
;UAS-Dicer; repoGS/+ (F)	862.75		;UAS- KK 104488/+; (F)	1080.25		;UAS- KK 104488/UAS-Dicer; repoGS/+ (F)	587
;UAS-Dicer; repoGS/+ (F)	711.75		;UAS- KK 104488/+; (F)	835.75		;UAS- KK 104488/UAS-Dicer; repoGS/+ (F)	662
;UAS-Dicer; repoGS/+ (F)	540.25		;UAS- KK 100221/+; (F)	915		;UAS- KK 100221/UAS-Dicer; repoGS/+ (F)	888.25
;UAS-Dicer; repoGS/+ (F)	940.5		;UAS- KK 100221/+; (F)	897.75		;UAS- KK 100221/UAS-Dicer; repoGS/+ (F)	757.5
;UAS-Dicer; repoGS/+ (F)	479.25		;UAS- KK 100221/+; (F)	923.25		;UAS- KK 100221/UAS-Dicer; repoGS/+ (F)	992
;UAS-Dicer; repoGS/+ (F)	531		;UAS- KK 100221/+; (F)	959.25		;UAS- KK 100221/UAS-Dicer; repoGS/+ (F)	902.25
;UAS-Dicer; repoGS/+ (F)	579.25		;UAS- KK 100221/+; (F)	851.75		;UAS- KK 100221/UAS-Dicer; repoGS/+ (F)	871.25
;UAS-Dicer; repoGS/+ (F)	691.5		;UAS- KK 100221/+; (F)	971.5		;UAS- KK 100221/UAS-Dicer; repoGS/+ (F)	1009.5
;UAS-Dicer; repoGS/+ (F)	746.75		;UAS- KK 100221/+; (F)	985.25		;UAS- KK 100221/UAS-Dicer; repoGS/+ (F)	1158
;UAS-Dicer; repoGS/+ (F)	656		;UAS- KK 100221/+; (F)	1038.75		;UAS- KK 100221/UAS-Dicer; repoGS/+ (F)	837.5
;UAS-Dicer; repoGS/+ (F)	928.5		;UAS- KK 100221/+; (F)	948.75		;UAS- KK 100221/UAS-Dicer; repoGS/+ (F)	624.5
;UAS-Dicer; repoGS/+ (F)	971.75		;UAS- KK 100221/+; (F)	904.5		;UAS- KK 100221/UAS-Dicer; repoGS/+ (F)	788.25
;UAS-Dicer; repoGS/+ (F)	927.75		;UAS- KK 100221/+; (F)	784.75		;UAS- KK 100221/UAS-Dicer; repoGS/+ (F)	951.5
;UAS-Dicer; repoGS/+ (F)	467.25		;UAS- KK 100221/+; (F)	897.75		;UAS- KK 100221/UAS-Dicer; repoGS/+ (F)	978
;UAS-Dicer; repoGS/+ (F)	420.75		;UAS- KK 100221/+; (F)	744.25		;UAS- KK 100221/UAS-Dicer; repoGS/+ (F)	913.5
;UAS-Dicer; repoGS/+ (F)	667.5		;UAS- KK 100221/+; (F)	789		;UAS- KK 100221/UAS-Dicer; repoGS/+ (F)	1069.25
;UAS-Dicer; repoGS/+ (F)	862.75		;UAS- KK 100221/+; (F)	920.5		;UAS- KK 100221/UAS-Dicer; repoGS/+ (F)	895.75
;UAS-Dicer; repoGS/+ (F)	711.75		;UAS- KK 100221/+; (F)	734.75		;UAS- KK 100221/UAS-Dicer; repoGS/+ (F)	861
;UAS-Dicer; repoGS/+ (F)	540.25		;;UAS- 33347/+ (F)	969		;UAS-Dicer/+;UAS- 33347/repoGS (F)	785.5
;UAS-Dicer; repoGS/+ (F)	940.5		;;UAS- 33347/+ (F)	834		;UAS-Dicer/+;UAS- 33347/repoGS (F)	699
;UAS-Dicer; repoGS/+ (F)	479.25		;;UAS- 33347/+ (F)	844.25		;UAS-Dicer/+;UAS- 33347/repoGS (F)	710.75
;UAS-Dicer; repoGS/+ (F)	531		;;UAS- 33347/+ (F)	863.5		;UAS-Dicer/+;UAS- 33347/repoGS (F)	972.75
;UAS-Dicer; repoGS/+ (F)	579.25		;;UAS- 33347/+ (F)	858.5		;UAS-Dicer/+;UAS- 33347/repoGS (F)	853
;UAS-Dicer; repoGS/+ (F)	691.5		;;UAS- 33347/+ (F)	920.25		;UAS-Dicer/+;UAS- 33347/repoGS (F)	752
;UAS-Dicer; repoGS/+ (F)	746.75		;;UAS- 33347/+ (F)	803.25		;UAS-Dicer/+;UAS- 33347/repoGS (F)	618.5
;UAS-Dicer; repoGS/+ (F)	656		;;UAS- 33347/+ (F)	953.75		;UAS-Dicer/+;UAS- 33347/repoGS (F)	598.5
;UAS-Dicer; repoGS/+ (F)	928.5		;;UAS- 33347/+ (F)	983.75		;UAS-Dicer/+;UAS- 33347/repoGS (F)	747.75
;UAS-Dicer; repoGS/+ (F)	971.75		;;UAS- 33347/+ (F)	948		;UAS-Dicer/+;UAS- 33347/repoGS (F)	552.25
;UAS-Dicer; repoGS/+ (F)	927.75		;;UAS- 33347/+ (F)	673.25		;UAS-Dicer/+;UAS- 33347/repoGS (F)	589
;UAS-Dicer; repoGS/+ (F)	467.25		;;UAS- 33347/+ (F)	920.75		;UAS-Dicer/+;UAS- 33347/repoGS (F)	492.75
;UAS-Dicer; repoGS/+ (F)	420.75		;;UAS- 33347/+ (F)	689.5		;UAS-Dicer/+;UAS- 33347/repoGS (F)	680.5
;UAS-Dicer; repoGS/+ (F)	667.5		;;UAS- 33347/+ (F)	907		;UAS-Dicer/+;UAS- 33347/repoGS (F)	683.5
;UAS-Dicer; repoGS/+ (F)	862.75		;;UAS- 33347/+ (F)	845.75		;UAS-Dicer/+;UAS- 33347/repoGS (F)	514
;UAS-Dicer; repoGS/+ (F)	711.75		;;UAS- 33347/+ (F)	907.25		;UAS-Dicer/+;UAS- 33347/repoGS (F)	601.25
;UAS-Dicer; repoGS/+ (F)	540.25		;UAS- 12692/+; (F)	795.5		;UAS- 12692/UAS-Dicer; repoGS/+; (F)	789
;UAS-Dicer; repoGS/+ (F)	940.5		;UAS- 12692/+; (F)	1091.5		;UAS- 12692/UAS-Dicer; repoGS/+; (F)	612.75
;UAS-Dicer; repoGS/+ (F)	479.25		;UAS- 12692/+; (F)	984		;UAS- 12692/UAS-Dicer; repoGS/+; (F)	620.5
;UAS-Dicer; repoGS/+ (F)	531		;UAS- 12692/+; (F)	1070.5		;UAS- 12692/UAS-Dicer; repoGS/+; (F)	558.5
;UAS-Dicer; repoGS/+ (F)	579.25		;UAS- 12692/+; (F)	856.25		;UAS- 12692/UAS-Dicer; repoGS/+; (F)	698.25
;UAS-Dicer; repoGS/+ (F)	691.5		;UAS- 12692/+; (F)	885		;UAS- 12692/UAS-Dicer; repoGS/+; (F)	695.75
;UAS-Dicer; repoGS/+ (F)	746.75		;UAS- 12692/+; (F)	809.5		;UAS- 12692/UAS-Dicer; repoGS/+; (F)	865.5
;UAS-Dicer; repoGS/+ (F)	656		;UAS- 12692/+; (F)	821		;UAS- 12692/UAS-Dicer; repoGS/+; (F)	761.25
;UAS-Dicer; repoGS/+ (F)	928.5		;UAS- 12692/+; (F)	776.25		;UAS- 12692/UAS-Dicer; repoGS/+; (F)	753.75
;UAS-Dicer; repoGS/+ (F)	971.75		;UAS- 12692/+; (F)	640.5		;UAS- 12692/UAS-Dicer; repoGS/+; (F)	659
;UAS-Dicer; repoGS/+ (F)	927.75		;UAS- 12692/+; (F)	898.25		;UAS- 12692/UAS-Dicer; repoGS/+; (F)	876.5
;UAS-Dicer; repoGS/+ (F)	467.25		;UAS- 12692/+; (F)	777.5		;UAS- 12692/UAS-Dicer; repoGS/+; (F)	740
;UAS-Dicer; repoGS/+ (F)	420.75		;UAS- 12692/+; (F)	979.25		;UAS- 12692/UAS-Dicer; repoGS/+; (F)	832.25
;UAS-Dicer; repoGS/+ (F)	667.5		;UAS- 12692/+; (F)	726.75		;UAS- 12692/UAS-Dicer; repoGS/+; (F)	1087.25
;UAS-Dicer; repoGS/+ (F)	862.75		;UAS- 12692/+; (F)	765.5		;UAS- 12692/UAS-Dicer; repoGS/+; (F)	830.25
;UAS-Dicer; repoGS/+ (F)	711.75		;UAS- 12692/+; (F)	864		;UAS- 12692/UAS-Dicer; repoGS/+; (F)	722.75
;UAS-Dicer; repoGS/+ (F)	540.25		;UAS- KK 108185/+; (F)	823.5		;UAS- KK 108185/UAS-Dicer; repoGS/+ (F)	941.75
;UAS-Dicer; repoGS/+ (F)	940.5		;UAS- KK 108185/+; (F)	855.25		;UAS- KK 108185/UAS-Dicer; repoGS/+ (F)	735
;UAS-Dicer; repoGS/+ (F)	479.25		;UAS- KK 108185/+; (F)	776.75		;UAS- KK 108185/UAS-Dicer; repoGS/+ (F)	895.25
;UAS-Dicer; repoGS/+ (F)	531		;UAS- KK 108185/+; (F)	798.25		;UAS- KK 108185/UAS-Dicer; repoGS/+ (F)	1117.25
;UAS-Dicer; repoGS/+ (F)	579.25		;UAS- KK 108185/+; (F)	688.75		;UAS- KK 108185/UAS-Dicer; repoGS/+ (F)	414.75
;UAS-Dicer; repoGS/+ (F)	691.5		;UAS- KK 108185/+; (F)	943.25		;UAS- KK 108185/UAS-Dicer; repoGS/+ (F)	860
;UAS-Dicer; repoGS/+ (F)	746.75		;UAS- KK 108185/+; (F)	861.75		;UAS- KK 108185/UAS-Dicer; repoGS/+ (F)	864.75
;UAS-Dicer; repoGS/+ (F)	656		;UAS- KK 108185/+; (F)	962.5		;UAS- KK 108185/UAS-Dicer; repoGS/+ (F)	1009
;UAS-Dicer; repoGS/+ (F)	928.5		;UAS- KK 108185/+; (F)	538.5		;UAS- KK 108185/UAS-Dicer; repoGS/+ (F)	1003.75
;UAS-Dicer; repoGS/+ (F)	971.75		;UAS- KK 108185/+; (F)	814.75		;UAS- KK 108185/UAS-Dicer; repoGS/+ (F)	986
;UAS-Dicer; repoGS/+ (F)	927.75		;UAS- KK 108185/+; (F)	768		;UAS- KK 108185/UAS-Dicer; repoGS/+ (F)	987.5
;UAS-Dicer; repoGS/+ (F)	467.25		;UAS- KK 108185/+; (F)	932.75		;UAS- KK 108185/UAS-Dicer; repoGS/+ (F)	877.75
;UAS-Dicer; repoGS/+ (F)	420.75		;UAS- KK 108185/+; (F)	957.5		;UAS- KK 108185/UAS-Dicer; repoGS/+ (F)	1078.5
;UAS-Dicer; repoGS/+ (F)	667.5		;UAS- KK 108185/+; (F)	751.5		;UAS- KK 108185/UAS-Dicer; repoGS/+ (F)	989.25
;UAS-Dicer; repoGS/+ (F)	862.75		;UAS- KK 108185/+; (F)	829.25		;UAS- KK 108185/UAS-Dicer; repoGS/+ (F)	862.25
;UAS-Dicer; repoGS/+ (F)	711.75		;UAS- KK 108185/+; (F)	714.25		;UAS- KK 108185/UAS-Dicer; repoGS/+ (F)	533.25
;UAS-Dicer; repoGS/+ (F)	540.25		;UAS- KK 110220/+; (F)	796.75		;UAS- KK 110220/UAS-Dicer; repoGS/+ (F)	995.25
;UAS-Dicer; repoGS/+ (F)	940.5		;UAS- KK 110220/+; (F)	868.75		;UAS- KK 110220/UAS-Dicer; repoGS/+ (F)	902
;UAS-Dicer; repoGS/+ (F)	479.25		;UAS- KK 110220/+; (F)	928		;UAS- KK 110220/UAS-Dicer; repoGS/+ (F)	875.75
;UAS-Dicer; repoGS/+ (F)	531		;UAS- KK 110220/+; (F)	867.5		;UAS- KK 110220/UAS-Dicer; repoGS/+ (F)	907.5
;UAS-Dicer; repoGS/+ (F)	579.25		;UAS- KK 110220/+; (F)	815.75		;UAS- KK 110220/UAS-Dicer; repoGS/+ (F)	1013.5
;UAS-Dicer; repoGS/+ (F)	691.5		;UAS- KK 110220/+; (F)	793.25		;UAS- KK 110220/UAS-Dicer; repoGS/+ (F)	1095
;UAS-Dicer; repoGS/+ (F)	746.75		;UAS- KK 110220/+; (F)	897.75		;UAS- KK 110220/UAS-Dicer; repoGS/+ (F)	1027
;UAS-Dicer; repoGS/+ (F)	656		;UAS- KK 110220/+; (F)	930.25		;UAS- KK 110220/UAS-Dicer; repoGS/+ (F)	716
;UAS-Dicer; repoGS/+ (F)	928.5		;UAS- KK 110220/+; (F)	937.5		;UAS- KK 110220/UAS-Dicer; repoGS/+ (F)	795.5
;UAS-Dicer; repoGS/+ (F)	971.75		;UAS- KK 110220/+; (F)	894.25		;UAS- KK 110220/UAS-Dicer; repoGS/+ (F)	1031
;UAS-Dicer; repoGS/+ (F)	927.75		;UAS- KK 110220/+; (F)	721		;UAS- KK 110220/UAS-Dicer; repoGS/+ (F)	951
;UAS-Dicer; repoGS/+ (F)	467.25		;UAS- KK 110220/+; (F)	965.25		;UAS- KK 110220/UAS-Dicer; repoGS/+ (F)	891.5
;UAS-Dicer; repoGS/+ (F)	420.75		;UAS- KK 110220/+; (F)	811		;UAS- KK 110220/UAS-Dicer; repoGS/+ (F)	878.25
;UAS-Dicer; repoGS/+ (F)	667.5		;UAS- KK 110220/+; (F)	1077.5		;UAS- KK 110220/UAS-Dicer; repoGS/+ (F)	924.25
;UAS-Dicer; repoGS/+ (F)	862.75		;UAS- KK 110220/+; (F)	996.5		;UAS- KK 110220/UAS-Dicer; repoGS/+ (F)	926.5
;UAS-Dicer; repoGS/+ (F)	711.75		;UAS- KK 110220/+; (F)	911.25
UAS-Dicer/+;repoGS/+ (F)	759		;14-4-3 E KK 108129/+; (F)	884.5		UAS-Dicer/14-4-3 E KK 108129;repoGS/+ (F)	1202.25
UAS-Dicer/+;repoGS/+ (F)	596.5		;14-4-3 E KK 108129/+; (F)	1070		UAS-Dicer/14-4-3 E KK 108129;repoGS/+ (F)	1080.33
UAS-Dicer/+;repoGS/+ (F)	869.5		;14-4-3 E KK 108129/+; (F)	1097.5		UAS-Dicer/14-4-3 E KK 108129;repoGS/+ (F)	1068.75
UAS-Dicer/+;repoGS/+ (F)	593.5		;14-4-3 E KK 108129/+; (F)	1013.5		UAS-Dicer/14-4-3 E KK 108129;repoGS/+ (F)	879
UAS-Dicer/+;repoGS/+ (F)	794		;14-4-3 E KK 108129/+; (F)	928.75		UAS-Dicer/14-4-3 E KK 108129;repoGS/+ (F)	880.25
UAS-Dicer/+;repoGS/+ (F)	726		;14-4-3 E KK 108129/+; (F)	1009		UAS-Dicer/14-4-3 E KK 108129;repoGS/+ (F)	953.25
UAS-Dicer/+;repoGS/+ (F)	773.25		;14-4-3 E KK 108129/+; (F)	1072.25		UAS-Dicer/14-4-3 E KK 108129;repoGS/+ (F)	981.75
UAS-Dicer/+;repoGS/+ (F)	913.5		;14-4-3 E KK 108129/+; (F)	829.25		UAS-Dicer/14-4-3 E KK 108129;repoGS/+ (F)	1073.75
UAS-Dicer/+;repoGS/+ (F)	480.25		;14-4-3 E KK 108129/+; (F)	1106		UAS-Dicer/14-4-3 E KK 108129;repoGS/+ (F)	952.75
UAS-Dicer/+;repoGS/+ (F)	671.5		;14-4-3 E KK 108129/+; (F)	1005.5		UAS-Dicer/14-4-3 E KK 108129;repoGS/+ (F)	853.75
UAS-Dicer/+;repoGS/+ (F)	495		;14-4-3 E KK 108129/+; (F)	1049.75		UAS-Dicer/14-4-3 E KK 108129;repoGS/+ (F)	986
UAS-Dicer/+;repoGS/+ (F)	623.75		;14-4-3 E KK 108129/+; (F)	974.75		UAS-Dicer/14-4-3 E KK 108129;repoGS/+ (F)	1082.75
UAS-Dicer/+;repoGS/+ (F)	638.5		;14-4-3 E KK 108129/+; (F)	995.5		UAS-Dicer/14-4-3 E KK 108129;repoGS/+ (F)	943.75
UAS-Dicer/+;repoGS/+ (F)	243		;14-4-3 E KK 108129/+; (F)	1138.5		UAS-Dicer/14-4-3 E KK 108129;repoGS/+ (F)	946.5
UAS-Dicer/+;repoGS/+ (F)	577		;14-4-3 E KK 108129/+; (F)	962		UAS-Dicer/14-4-3 E KK 108129;repoGS/+ (F)	1045.25
UAS-Dicer/+;repoGS/+ (F)	705.5		;14-4-3 E KK 108129/+; (F)	932.5		UAS-Dicer/14-4-3 E KK 108129;repoGS/+ (F)	1066.75
UAS-Dicer/+;repoGS/+ (F)	759		;cyp6a20 GD 3313/+; (F)	700		UAS-Dicer/cyp6a20 GD 3313;repoGS/+ (F)	585
UAS-Dicer/+;repoGS/+ (F)	596.5		;cyp6a20 GD 3313/+; (F)	676.75		UAS-Dicer/cyp6a20 GD 3313;repoGS/+ (F)	516.75
UAS-Dicer/+;repoGS/+ (F)	869.5		;cyp6a20 GD 3313/+; (F)	640.75		UAS-Dicer/cyp6a20 GD 3313;repoGS/+ (F)	388.25
UAS-Dicer/+;repoGS/+ (F)	593.5		;cyp6a20 GD 3313/+; (F)	715.25		UAS-Dicer/cyp6a20 GD 3313;repoGS/+ (F)	649.25
UAS-Dicer/+;repoGS/+ (F)	794		;cyp6a20 GD 3313/+; (F)	832.25		UAS-Dicer/cyp6a20 GD 3313;repoGS/+ (F)	622
UAS-Dicer/+;repoGS/+ (F)	726		;cyp6a20 GD 3313/+; (F)	807.5		UAS-Dicer/cyp6a20 GD 3313;repoGS/+ (F)	520.25
UAS-Dicer/+;repoGS/+ (F)	773.25		;cyp6a20 GD 3313/+; (F)	1114.5		UAS-Dicer/cyp6a20 GD 3313;repoGS/+ (F)	546.75
UAS-Dicer/+;repoGS/+ (F)	913.5		;cyp6a20 GD 3313/+; (F)	754.25		UAS-Dicer/cyp6a20 GD 3313;repoGS/+ (F)	604
UAS-Dicer/+;repoGS/+ (F)	480.25		;cyp6a20 GD 3313/+; (F)	773.25		UAS-Dicer/cyp6a20 GD 3313;repoGS/+ (F)	485.25
UAS-Dicer/+;repoGS/+ (F)	671.5		;cyp6a20 GD 3313/+; (F)	931.75		UAS-Dicer/cyp6a20 GD 3313;repoGS/+ (F)	521
UAS-Dicer/+;repoGS/+ (F)	495		;cyp6a20 GD 3313/+; (F)	931.25		UAS-Dicer/cyp6a20 GD 3313;repoGS/+ (F)	732.25
UAS-Dicer/+;repoGS/+ (F)	623.75		;cyp6a20 GD 3313/+; (F)	645.75		UAS-Dicer/cyp6a20 GD 3313;repoGS/+ (F)	138
UAS-Dicer/+;repoGS/+ (F)	638.5		;cyp6a20 GD 3313/+; (F)	872.25		UAS-Dicer/cyp6a20 GD 3313;repoGS/+ (F)	179.5
UAS-Dicer/+;repoGS/+ (F)	243		;cyp6a20 GD 3313/+; (F)	912		UAS-Dicer/cyp6a20 GD 3313;repoGS/+ (F)	755
UAS-Dicer/+;repoGS/+ (F)	577		;cyp6a20 GD 3313/+; (F)	867		UAS-Dicer/cyp6a20 GD 3313;repoGS/+ (F)	338.5
UAS-Dicer/+;repoGS/+ (F)	705.5		;cyp6a20 GD 3313/+; (F)	810.5		UAS-Dicer/cyp6a20 GD 3313;repoGS/+ (F)	530.75
;UAS-Dicer/+;repoGS/+ (F)	541.5		;pld KK 106137/+; (F)	1047		;pld KK 106137/UAS-Dicer;repoGS/+ (F)	925
;UAS-Dicer/+;repoGS/+ (F)	590.25		;pld KK 106137/+; (F)	760		;pld KK 106137/UAS-Dicer;repoGS/+ (F)	1180
;UAS-Dicer/+;repoGS/+ (F)	1063.25		;pld KK 106137/+; (F)	845.75		;pld KK 106137/UAS-Dicer;repoGS/+ (F)	712.25
;UAS-Dicer/+;repoGS/+ (F)	668.25		;pld KK 106137/+; (F)	1022.25		;pld KK 106137/UAS-Dicer;repoGS/+ (F)	738.5
;UAS-Dicer/+;repoGS/+ (F)	455.75		;pld KK 106137/+; (F)	1279.25		;pld KK 106137/UAS-Dicer;repoGS/+ (F)	889.75
;UAS-Dicer/+;repoGS/+ (F)	639.25		;pld KK 106137/+; (F)	796.25		;pld KK 106137/UAS-Dicer;repoGS/+ (F)	794.5
;UAS-Dicer/+;repoGS/+ (F)	623		;pld KK 106137/+; (F)	945		;pld KK 106137/UAS-Dicer;repoGS/+ (F)	961.5
;UAS-Dicer/+;repoGS/+ (F)	728.25		;pld KK 106137/+; (F)	1098.25		;pld KK 106137/UAS-Dicer;repoGS/+ (F)	613.5
;UAS-Dicer/+;repoGS/+ (F)	462.75		;pld KK 106137/+; (F)	1090.25		;pld KK 106137/UAS-Dicer;repoGS/+ (F)	733
;UAS-Dicer/+;repoGS/+ (F)	542.25		;pld KK 106137/+; (F)	1097.5		;pld KK 106137/UAS-Dicer;repoGS/+ (F)	896.75
;UAS-Dicer/+;repoGS/+ (F)	406		;pld KK 106137/+; (F)	1152.75		;pld KK 106137/UAS-Dicer;repoGS/+ (F)	920
;UAS-Dicer/+;repoGS/+ (F)	478		;pld KK 106137/+; (F)	862		;pld KK 106137/UAS-Dicer;repoGS/+ (F)	809.75
;UAS-Dicer/+;repoGS/+ (F)	503.5		;pld KK 106137/+; (F)	1333.5		;pld KK 106137/UAS-Dicer;repoGS/+ (F)	774.25
;UAS-Dicer/+;repoGS/+ (F)	581.75		;pld KK 106137/+; (F)	650.25		;pld KK 106137/UAS-Dicer;repoGS/+ (F)	980.25
;UAS-Dicer/+;repoGS/+ (F)	335.25		;pld KK 106137/+; (F)	1149.5		;pld KK 106137/UAS-Dicer;repoGS/+ (F)	731.5
;UAS-Dicer/+;repoGS/+ (F)	476		;pld KK 106137/+; (F)	669.75
UAS-Dicer/+;repoGS/+ (F)	708		;Fer1HCH KK 102406/+; (F)	747.25		UAS-Dicer/Fer1HCH KK 102406;repoGS/+ (F)	749.25
UAS-Dicer/+;repoGS/+ (F)	802.5		;Fer1HCH KK 102406/+; (F)	865.25		UAS-Dicer/Fer1HCH KK 102406;repoGS/+ (F)	717.75
UAS-Dicer/+;repoGS/+ (F)	282.75		;Fer1HCH KK 102406/+; (F)	654.75		UAS-Dicer/Fer1HCH KK 102406;repoGS/+ (F)	856
UAS-Dicer/+;repoGS/+ (F)	513.5		;Fer1HCH KK 102406/+; (F)	698.5		UAS-Dicer/Fer1HCH KK 102406;repoGS/+ (F)	768.25
UAS-Dicer/+;repoGS/+ (F)	482.75		;Fer1HCH KK 102406/+; (F)	894		UAS-Dicer/Fer1HCH KK 102406;repoGS/+ (F)	671.25
UAS-Dicer/+;repoGS/+ (F)	504		;Fer1HCH KK 102406/+; (F)	795.75		UAS-Dicer/Fer1HCH KK 102406;repoGS/+ (F)	548.75
UAS-Dicer/+;repoGS/+ (F)	850		;Fer1HCH KK 102406/+; (F)	764.75		UAS-Dicer/Fer1HCH KK 102406;repoGS/+ (F)	644
UAS-Dicer/+;repoGS/+ (F)	753.25		;Fer1HCH KK 102406/+; (F)	838.5		UAS-Dicer/Fer1HCH KK 102406;repoGS/+ (F)	691.75
UAS-Dicer/+;repoGS/+ (F)	616		;Fer1HCH KK 102406/+; (F)	877		UAS-Dicer/Fer1HCH KK 102406;repoGS/+ (F)	676.25
UAS-Dicer/+;repoGS/+ (F)	699		;Fer1HCH KK 102406/+; (F)	827		UAS-Dicer/Fer1HCH KK 102406;repoGS/+ (F)	782.25
UAS-Dicer/+;repoGS/+ (F)	896.75		;Fer1HCH KK 102406/+; (F)	705.5		UAS-Dicer/Fer1HCH KK 102406;repoGS/+ (F)	774.5
UAS-Dicer/+;repoGS/+ (F)	582.5		;Fer1HCH KK 102406/+; (F)	710.75		UAS-Dicer/Fer1HCH KK 102406;repoGS/+ (F)	746.75
UAS-Dicer/+;repoGS/+ (F)	492.5		;Fer1HCH KK 102406/+; (F)	235.5		UAS-Dicer/Fer1HCH KK 102406;repoGS/+ (F)	529.75
UAS-Dicer/+;repoGS/+ (F)	534.25		;Fer1HCH KK 102406/+; (F)	445.75		UAS-Dicer/Fer1HCH KK 102406;repoGS/+ (F)	789.25
UAS-Dicer/+;repoGS/+ (F)	645.5		;Fer1HCH KK 102406/+; (F)	801		UAS-Dicer/Fer1HCH KK 102406;repoGS/+ (F)	701.5
UAS-Dicer/+;repoGS/+ (F)	626.5					UAS-Dicer/Fer1HCH KK 102406;repoGS/+ (F)	917
UAS-Dicer/+;repoGS/+ (F)	708		;Fer2LCH KK 106960/+; (F)	822.25		UAS-Dicer/Fer2LCH KK 106960;repoGS/+ (F)	1048.25
UAS-Dicer/+;repoGS/+ (F)	802.5		;Fer2LCH KK 106960/+; (F)	815.25		UAS-Dicer/Fer2LCH KK 106960;repoGS/+ (F)	1085.25
UAS-Dicer/+;repoGS/+ (F)	282.75		;Fer2LCH KK 106960/+; (F)	950.75		UAS-Dicer/Fer2LCH KK 106960;repoGS/+ (F)	770.25
UAS-Dicer/+;repoGS/+ (F)	513.5		;Fer2LCH KK 106960/+; (F)	1074.75		UAS-Dicer/Fer2LCH KK 106960;repoGS/+ (F)	895.5
UAS-Dicer/+;repoGS/+ (F)	482.75		;Fer2LCH KK 106960/+; (F)	873.5		UAS-Dicer/Fer2LCH KK 106960;repoGS/+ (F)	877.25
UAS-Dicer/+;repoGS/+ (F)	504		;Fer2LCH KK 106960/+; (F)	856		UAS-Dicer/Fer2LCH KK 106960;repoGS/+ (F)	966.25
UAS-Dicer/+;repoGS/+ (F)	850		;Fer2LCH KK 106960/+; (F)	1047.25		UAS-Dicer/Fer2LCH KK 106960;repoGS/+ (F)	1057
UAS-Dicer/+;repoGS/+ (F)	753.25		;Fer2LCH KK 106960/+; (F)	936.5		UAS-Dicer/Fer2LCH KK 106960;repoGS/+ (F)	767.5
UAS-Dicer/+;repoGS/+ (F)	616		;Fer2LCH KK 106960/+; (F)	912.25		UAS-Dicer/Fer2LCH KK 106960;repoGS/+ (F)	1043.25
UAS-Dicer/+;repoGS/+ (F)	699		;Fer2LCH KK 106960/+; (F)	1033.25		UAS-Dicer/Fer2LCH KK 106960;repoGS/+ (F)	990
UAS-Dicer/+;repoGS/+ (F)	896.75		;Fer2LCH KK 106960/+; (F)	989.5		UAS-Dicer/Fer2LCH KK 106960;repoGS/+ (F)	957.25
UAS-Dicer/+;repoGS/+ (F)	582.5		;Fer2LCH KK 106960/+; (F)	930.25		UAS-Dicer/Fer2LCH KK 106960;repoGS/+ (F)	1006.75
UAS-Dicer/+;repoGS/+ (F)	492.5		;Fer2LCH KK 106960/+; (F)	1000.5		UAS-Dicer/Fer2LCH KK 106960;repoGS/+ (F)	831.5
UAS-Dicer/+;repoGS/+ (F)	534.25		;Fer2LCH KK 106960/+; (F)	918		UAS-Dicer/Fer2LCH KK 106960;repoGS/+ (F)	1059.25
UAS-Dicer/+;repoGS/+ (F)	645.5		;Fer2LCH KK 106960/+; (F)	857		UAS-Dicer/Fer2LCH KK 106960;repoGS/+ (F)	956.75
UAS-Dicer/+;repoGS/+ (F)	626.5					UAS-Dicer/Fer2LCH KK 106960;repoGS/+ (F)	888
UAS-Dicer/+;repoGS/+ (F)	708		;MtnA KK 105011/+; (F)	960.5		UAS-Dicer/MtnA KK 105011;repoGS/+ (F)	755.5
UAS-Dicer/+;repoGS/+ (F)	802.5		;MtnA KK 105011/+; (F)	1003.25		UAS-Dicer/MtnA KK 105011;repoGS/+ (F)	935.5
UAS-Dicer/+;repoGS/+ (F)	282.75		;MtnA KK 105011/+; (F)	671.25		UAS-Dicer/MtnA KK 105011;repoGS/+ (F)	829.5
UAS-Dicer/+;repoGS/+ (F)	513.5		;MtnA KK 105011/+; (F)	476.5		UAS-Dicer/MtnA KK 105011;repoGS/+ (F)	1023.25
UAS-Dicer/+;repoGS/+ (F)	482.75		;MtnA KK 105011/+; (F)	811.5		UAS-Dicer/MtnA KK 105011;repoGS/+ (F)	1081.5
UAS-Dicer/+;repoGS/+ (F)	504		;MtnA KK 105011/+; (F)	762.75		UAS-Dicer/MtnA KK 105011;repoGS/+ (F)	1167.75
UAS-Dicer/+;repoGS/+ (F)	850		;MtnA KK 105011/+; (F)	834.75		UAS-Dicer/MtnA KK 105011;repoGS/+ (F)	841.5
UAS-Dicer/+;repoGS/+ (F)	753.25		;MtnA KK 105011/+; (F)	671.25		UAS-Dicer/MtnA KK 105011;repoGS/+ (F)	969.5
UAS-Dicer/+;repoGS/+ (F)	616		;MtnA KK 105011/+; (F)	848.75		UAS-Dicer/MtnA KK 105011;repoGS/+ (F)	901
UAS-Dicer/+;repoGS/+ (F)	699		;MtnA KK 105011/+; (F)	595		UAS-Dicer/MtnA KK 105011;repoGS/+ (F)	734
UAS-Dicer/+;repoGS/+ (F)	896.75		;MtnA KK 105011/+; (F)	610		UAS-Dicer/MtnA KK 105011;repoGS/+ (F)	935.5
UAS-Dicer/+;repoGS/+ (F)	582.5		;MtnA KK 105011/+; (F)	760		UAS-Dicer/MtnA KK 105011;repoGS/+ (F)	713
UAS-Dicer/+;repoGS/+ (F)	492.5		;MtnA KK 105011/+; (F)	901.75		UAS-Dicer/MtnA KK 105011;repoGS/+ (F)	936.5
UAS-Dicer/+;repoGS/+ (F)	534.25		;MtnA KK 105011/+; (F)	556		UAS-Dicer/MtnA KK 105011;repoGS/+ (F)	793.25
UAS-Dicer/+;repoGS/+ (F)	645.5		;MtnA KK 105011/+; (F)	737.5		UAS-Dicer/MtnA KK 105011;repoGS/+ (F)	1117
UAS-Dicer/+;repoGS/+ (F)	626.5		;MtnA KK 105011/+; (F)	581.5		UAS-Dicer/MtnA KK 105011;repoGS/+ (F)	976.25
;UAS-Dicer/+;repoGS/+ (F)	541.5		;arouser KK 105755/+; (F)	932.75		;arouser KK 105755/UAS-Dicer;repoGS/+ (F)	1021.5
;UAS-Dicer/+;repoGS/+ (F)	590.25		;arouser KK 105755/+; (F)	927.75		;arouser KK 105755/UAS-Dicer;repoGS/+ (F)	797.5
;UAS-Dicer/+;repoGS/+ (F)	1063.25		;arouser KK 105755/+; (F)	846.75		;arouser KK 105755/UAS-Dicer;repoGS/+ (F)	1159.25
;UAS-Dicer/+;repoGS/+ (F)	668.25		;arouser KK 105755/+; (F)	910		;arouser KK 105755/UAS-Dicer;repoGS/+ (F)	807.75
;UAS-Dicer/+;repoGS/+ (F)	455.75		;arouser KK 105755/+; (F)	1056.75		;arouser KK 105755/UAS-Dicer;repoGS/+ (F)	741.75
;UAS-Dicer/+;repoGS/+ (F)	639.25		;arouser KK 105755/+; (F)	1126.5		;arouser KK 105755/UAS-Dicer;repoGS/+ (F)	841.5
;UAS-Dicer/+;repoGS/+ (F)	623		;arouser KK 105755/+; (F)	923.25		;arouser KK 105755/UAS-Dicer;repoGS/+ (F)	1065.5
;UAS-Dicer/+;repoGS/+ (F)	728.25		;arouser KK 105755/+; (F)	931.5		;arouser KK 105755/UAS-Dicer;repoGS/+ (F)	752.5
;UAS-Dicer/+;repoGS/+ (F)	462.75		;arouser KK 105755/+; (F)	972.5		;arouser KK 105755/UAS-Dicer;repoGS/+ (F)	656.5
;UAS-Dicer/+;repoGS/+ (F)	542.25		;arouser KK 105755/+; (F)	912.25		;arouser KK 105755/UAS-Dicer;repoGS/+ (F)	825
;UAS-Dicer/+;repoGS/+ (F)	406		;arouser KK 105755/+; (F)	1046.75		;arouser KK 105755/UAS-Dicer;repoGS/+ (F)	861.25
;UAS-Dicer/+;repoGS/+ (F)	478		;arouser KK 105755/+; (F)	853		;arouser KK 105755/UAS-Dicer;repoGS/+ (F)	920.75
;UAS-Dicer/+;repoGS/+ (F)	503.5		;arouser KK 105755/+; (F)	849.75		;arouser KK 105755/UAS-Dicer;repoGS/+ (F)	765.75
;UAS-Dicer/+;repoGS/+ (F)	581.75		;arouser KK 105755/+; (F)	1026		;arouser KK 105755/UAS-Dicer;repoGS/+ (F)	1056.25
;UAS-Dicer/+;repoGS/+ (F)	335.25		;arouser KK 105755/+; (F)	862.5		;arouser KK 105755/UAS-Dicer;repoGS/+ (F)	761.25
;UAS-Dicer/+;repoGS/+ (F)	476		;arouser KK 105755/+; (F)	929.5		;arouser KK 105755/UAS-Dicer;repoGS/+ (F)	748.25
;UAS-Dicer/+;repoGS/+ (F)	541.5		;sesB KK 104576/+; (F)	833		;sesB KK 104576/UAS-Dicer;repoGS/+ (F)	760.25
;UAS-Dicer/+;repoGS/+ (F)	590.25		;sesB KK 104576/+; (F)	810.5		;sesB KK 104576/UAS-Dicer;repoGS/+ (F)	892.75
;UAS-Dicer/+;repoGS/+ (F)	1063.25		;sesB KK 104576/+; (F)	846.5		;sesB KK 104576/UAS-Dicer;repoGS/+ (F)	632
;UAS-Dicer/+;repoGS/+ (F)	668.25		;sesB KK 104576/+; (F)	1293.5		;sesB KK 104576/UAS-Dicer;repoGS/+ (F)	443
;UAS-Dicer/+;repoGS/+ (F)	455.75		;sesB KK 104576/+; (F)	925.75		;sesB KK 104576/UAS-Dicer;repoGS/+ (F)	951.75
;UAS-Dicer/+;repoGS/+ (F)	639.25		;sesB KK 104576/+; (F)	1222.75		;sesB KK 104576/UAS-Dicer;repoGS/+ (F)	789.25
;UAS-Dicer/+;repoGS/+ (F)	623		;sesB KK 104576/+; (F)	792.75		;sesB KK 104576/UAS-Dicer;repoGS/+ (F)	737.5
;UAS-Dicer/+;repoGS/+ (F)	728.25		;sesB KK 104576/+; (F)	823.5		;sesB KK 104576/UAS-Dicer;repoGS/+ (F)	540.5
;UAS-Dicer/+;repoGS/+ (F)	462.75		;sesB KK 104576/+; (F)	891.25		;sesB KK 104576/UAS-Dicer;repoGS/+ (F)	576.25
;UAS-Dicer/+;repoGS/+ (F)	542.25		;sesB KK 104576/+; (F)	905.75		;sesB KK 104576/UAS-Dicer;repoGS/+ (F)	477.25
;UAS-Dicer/+;repoGS/+ (F)	406		;sesB KK 104576/+; (F)	770.5		;sesB KK 104576/UAS-Dicer;repoGS/+ (F)	740.75
;UAS-Dicer/+;repoGS/+ (F)	478		;sesB KK 104576/+; (F)	929.5		;sesB KK 104576/UAS-Dicer;repoGS/+ (F)	682.75
;UAS-Dicer/+;repoGS/+ (F)	503.5		;sesB KK 104576/+; (F)	870.25		;sesB KK 104576/UAS-Dicer;repoGS/+ (F)	751.75
;UAS-Dicer/+;repoGS/+ (F)	581.75		;sesB KK 104576/+; (F)	821.75		;sesB KK 104576/UAS-Dicer;repoGS/+ (F)	788.25
;UAS-Dicer/+;repoGS/+ (F)	335.25		;sesB KK 104576/+; (F)	651.25		;sesB KK 104576/UAS-Dicer;repoGS/+ (F)	715.5
;UAS-Dicer/+;repoGS/+ (F)	476					;sesB KK 104576/UAS-Dicer;repoGS/+ (F)	1041.75
UAS-Dicer/+;repoGS/+ (F)	759		;;CG10433 GD 41162/+ (F)	788.25		UAS-Dicer/+;repoGS/CG10433 GD 41162 (F)	815.25
UAS-Dicer/+;repoGS/+ (F)	596.5		;;CG10433 GD 41162/+ (F)	957		UAS-Dicer/+;repoGS/CG10433 GD 41162 (F)	712.25
UAS-Dicer/+;repoGS/+ (F)	869.5		;;CG10433 GD 41162/+ (F)	959.25		UAS-Dicer/+;repoGS/CG10433 GD 41162 (F)	307.75
UAS-Dicer/+;repoGS/+ (F)	593.5		;;CG10433 GD 41162/+ (F)	1031.5		UAS-Dicer/+;repoGS/CG10433 GD 41162 (F)	444
UAS-Dicer/+;repoGS/+ (F)	794		;;CG10433 GD 41162/+ (F)	821.25		UAS-Dicer/+;repoGS/CG10433 GD 41162 (F)	693
UAS-Dicer/+;repoGS/+ (F)	726		;;CG10433 GD 41162/+ (F)	925.5		UAS-Dicer/+;repoGS/CG10433 GD 41162 (F)	596.25
UAS-Dicer/+;repoGS/+ (F)	773.25		;;CG10433 GD 41162/+ (F)	747		UAS-Dicer/+;repoGS/CG10433 GD 41162 (F)	515.5
UAS-Dicer/+;repoGS/+ (F)	913.5		;;CG10433 GD 41162/+ (F)	956.5		UAS-Dicer/+;repoGS/CG10433 GD 41162 (F)	526.75
UAS-Dicer/+;repoGS/+ (F)	480.25		;;CG10433 GD 41162/+ (F)	760.25		UAS-Dicer/+;repoGS/CG10433 GD 41162 (F)	756
UAS-Dicer/+;repoGS/+ (F)	671.5		;;CG10433 GD 41162/+ (F)	621		UAS-Dicer/+;repoGS/CG10433 GD 41162 (F)	616.25
UAS-Dicer/+;repoGS/+ (F)	495		;;CG10433 GD 41162/+ (F)	970.75		UAS-Dicer/+;repoGS/CG10433 GD 41162 (F)	615.75
UAS-Dicer/+;repoGS/+ (F)	623.75		;;CG10433 GD 41162/+ (F)	617		UAS-Dicer/+;repoGS/CG10433 GD 41162 (F)	877.25
UAS-Dicer/+;repoGS/+ (F)	638.5		;;CG10433 GD 41162/+ (F)	887.5		UAS-Dicer/+;repoGS/CG10433 GD 41162 (F)	629.25
UAS-Dicer/+;repoGS/+ (F)	243		;;CG10433 GD 41162/+ (F)	989.25		UAS-Dicer/+;repoGS/CG10433 GD 41162 (F)	714
UAS-Dicer/+;repoGS/+ (F)	577		;;CG10433 GD 41162/+ (F)	474.75		UAS-Dicer/+;repoGS/CG10433 GD 41162 (F)	358.5
UAS-Dicer/+;repoGS/+ (F)	705.5		;;CG10433 GD 41162/+ (F)	697.25		UAS-Dicer/+;repoGS/CG10433 GD 41162 (F)	481
UAS-Dicer/+;repoGS/+ (F)	759		;gste7 KK 104977/+; (F)	848.5		UAS-Dicer/gste7 KK 104977;repoGS/+ (F)	742.75
UAS-Dicer/+;repoGS/+ (F)	596.5		;gste7 KK 104977/+; (F)	811.75		UAS-Dicer/gste7 KK 104977;repoGS/+ (F)	749.25
UAS-Dicer/+;repoGS/+ (F)	869.5		;gste7 KK 104977/+; (F)	983.5		UAS-Dicer/gste7 KK 104977;repoGS/+ (F)	1028
UAS-Dicer/+;repoGS/+ (F)	593.5		;gste7 KK 104977/+; (F)	687.75		UAS-Dicer/gste7 KK 104977;repoGS/+ (F)	842
UAS-Dicer/+;repoGS/+ (F)	794		;gste7 KK 104977/+; (F)	809.75		UAS-Dicer/gste7 KK 104977;repoGS/+ (F)	684.75
UAS-Dicer/+;repoGS/+ (F)	726		;gste7 KK 104977/+; (F)	995		UAS-Dicer/gste7 KK 104977;repoGS/+ (F)	657.5
UAS-Dicer/+;repoGS/+ (F)	773.25		;gste7 KK 104977/+; (F)	894.5		UAS-Dicer/gste7 KK 104977;repoGS/+ (F)	831.75
UAS-Dicer/+;repoGS/+ (F)	913.5		;gste7 KK 104977/+; (F)	1007.75		UAS-Dicer/gste7 KK 104977;repoGS/+ (F)	732.25
UAS-Dicer/+;repoGS/+ (F)	480.25		;gste7 KK 104977/+; (F)	864		UAS-Dicer/gste7 KK 104977;repoGS/+ (F)	943.75
UAS-Dicer/+;repoGS/+ (F)	671.5		;gste7 KK 104977/+; (F)	665		UAS-Dicer/gste7 KK 104977;repoGS/+ (F)	992
UAS-Dicer/+;repoGS/+ (F)	495		;gste7 KK 104977/+; (F)	846.5		UAS-Dicer/gste7 KK 104977;repoGS/+ (F)	708.75
UAS-Dicer/+;repoGS/+ (F)	623.75		;gste7 KK 104977/+; (F)	703.75		UAS-Dicer/gste7 KK 104977;repoGS/+ (F)	586
UAS-Dicer/+;repoGS/+ (F)	638.5		;gste7 KK 104977/+; (F)	843		UAS-Dicer/gste7 KK 104977;repoGS/+ (F)	909.75
UAS-Dicer/+;repoGS/+ (F)	243		;gste7 KK 104977/+; (F)	706		UAS-Dicer/gste7 KK 104977;repoGS/+ (F)	837.25
UAS-Dicer/+;repoGS/+ (F)	577		;gste7 KK 104977/+; (F)	961.75		UAS-Dicer/gste7 KK 104977;repoGS/+ (F)	875.25
UAS-Dicer/+;repoGS/+ (F)	705.5		;gste7 KK 104977/+; (F)	664		UAS-Dicer/gste7 KK 104977;repoGS/+ (F)	859
UAS-Dicer/+;repoGS/+ (F)	759		;DnaJ-1 KK 104618/+; (F)	840.5		UAS-Dicer/DnaJ-1 KK 104618;repoGS/+ (F)	824.25
UAS-Dicer/+;repoGS/+ (F)	596.5		;DnaJ-1 KK 104618/+; (F)	1261.75		UAS-Dicer/DnaJ-1 KK 104618;repoGS/+ (F)	1085.25
UAS-Dicer/+;repoGS/+ (F)	869.5		;DnaJ-1 KK 104618/+; (F)	857.75		UAS-Dicer/DnaJ-1 KK 104618;repoGS/+ (F)	712.75
UAS-Dicer/+;repoGS/+ (F)	593.5		;DnaJ-1 KK 104618/+; (F)	1060.25		UAS-Dicer/DnaJ-1 KK 104618;repoGS/+ (F)	723.75
UAS-Dicer/+;repoGS/+ (F)	794		;DnaJ-1 KK 104618/+; (F)	745		UAS-Dicer/DnaJ-1 KK 104618;repoGS/+ (F)	979.5
UAS-Dicer/+;repoGS/+ (F)	726		;DnaJ-1 KK 104618/+; (F)	1021.5		UAS-Dicer/DnaJ-1 KK 104618;repoGS/+ (F)	953.25
UAS-Dicer/+;repoGS/+ (F)	773.25		;DnaJ-1 KK 104618/+; (F)	937.25		UAS-Dicer/DnaJ-1 KK 104618;repoGS/+ (F)	738.5
UAS-Dicer/+;repoGS/+ (F)	913.5		;DnaJ-1 KK 104618/+; (F)	799.75		UAS-Dicer/DnaJ-1 KK 104618;repoGS/+ (F)	845.25
UAS-Dicer/+;repoGS/+ (F)	480.25		;DnaJ-1 KK 104618/+; (F)	876		UAS-Dicer/DnaJ-1 KK 104618;repoGS/+ (F)	704.5
UAS-Dicer/+;repoGS/+ (F)	671.5		;DnaJ-1 KK 104618/+; (F)	1134.5		UAS-Dicer/DnaJ-1 KK 104618;repoGS/+ (F)	967
UAS-Dicer/+;repoGS/+ (F)	495		;DnaJ-1 KK 104618/+; (F)	906.75		UAS-Dicer/DnaJ-1 KK 104618;repoGS/+ (F)	698.25
UAS-Dicer/+;repoGS/+ (F)	623.75		;DnaJ-1 KK 104618/+; (F)	689.5		UAS-Dicer/DnaJ-1 KK 104618;repoGS/+ (F)	746.5
UAS-Dicer/+;repoGS/+ (F)	638.5		;DnaJ-1 KK 104618/+; (F)	881.5		UAS-Dicer/DnaJ-1 KK 104618;repoGS/+ (F)	999.25
UAS-Dicer/+;repoGS/+ (F)	243		;DnaJ-1 KK 104618/+; (F)	816.25		UAS-Dicer/DnaJ-1 KK 104618;repoGS/+ (F)	959
UAS-Dicer/+;repoGS/+ (F)	577		;DnaJ-1 KK 104618/+; (F)	983.5		UAS-Dicer/DnaJ-1 KK 104618;repoGS/+ (F)	978.5
UAS-Dicer/+;repoGS/+ (F)	705.5		;DnaJ-1 KK 104618/+; (F)	905.25		UAS-Dicer/DnaJ-1 KK 104618;repoGS/+ (F)	978.5
UAS-Dicer/+;repoGS/+ (F)	759		;;santa-maria GD 33153/+ (F)	693.75		UAS-Dicer/+;repoGS/santa-maria GD 33153 (F)	621.25
UAS-Dicer/+;repoGS/+ (F)	596.5		;;santa-maria GD 33153/+ (F)	815.5		UAS-Dicer/+;repoGS/santa-maria GD 33153 (F)	960.25
UAS-Dicer/+;repoGS/+ (F)	869.5		;;santa-maria GD 33153/+ (F)	719		UAS-Dicer/+;repoGS/santa-maria GD 33153 (F)	852.5
UAS-Dicer/+;repoGS/+ (F)	593.5		;;santa-maria GD 33153/+ (F)	951.5		UAS-Dicer/+;repoGS/santa-maria GD 33153 (F)	791.25
UAS-Dicer/+;repoGS/+ (F)	794		;;santa-maria GD 33153/+ (F)	555.5		UAS-Dicer/+;repoGS/santa-maria GD 33153 (F)	512.75
UAS-Dicer/+;repoGS/+ (F)	726		;;santa-maria GD 33153/+ (F)	971.75		UAS-Dicer/+;repoGS/santa-maria GD 33153 (F)	669.5
UAS-Dicer/+;repoGS/+ (F)	773.25		;;santa-maria GD 33153/+ (F)	936		UAS-Dicer/+;repoGS/santa-maria GD 33153 (F)	794
UAS-Dicer/+;repoGS/+ (F)	913.5		;;santa-maria GD 33153/+ (F)	717		UAS-Dicer/+;repoGS/santa-maria GD 33153 (F)	823.75
UAS-Dicer/+;repoGS/+ (F)	480.25		;;santa-maria GD 33153/+ (F)	905.75		UAS-Dicer/+;repoGS/santa-maria GD 33153 (F)	610.5
UAS-Dicer/+;repoGS/+ (F)	671.5		;;santa-maria GD 33153/+ (F)	826.5		UAS-Dicer/+;repoGS/santa-maria GD 33153 (F)	724.5
UAS-Dicer/+;repoGS/+ (F)	495		;;santa-maria GD 33153/+ (F)	1144.75		UAS-Dicer/+;repoGS/santa-maria GD 33153 (F)	934.25
UAS-Dicer/+;repoGS/+ (F)	623.75		;;santa-maria GD 33153/+ (F)	841.5		UAS-Dicer/+;repoGS/santa-maria GD 33153 (F)	824.5
UAS-Dicer/+;repoGS/+ (F)	638.5		;;santa-maria GD 33153/+ (F)	808.5		UAS-Dicer/+;repoGS/santa-maria GD 33153 (F)	828.25
UAS-Dicer/+;repoGS/+ (F)	243		;;santa-maria GD 33153/+ (F)	799.25		UAS-Dicer/+;repoGS/santa-maria GD 33153 (F)	584.5
UAS-Dicer/+;repoGS/+ (F)	577		;;santa-maria GD 33153/+ (F)	736.5		UAS-Dicer/+;repoGS/santa-maria GD 33153 (F)	528
UAS-Dicer/+;repoGS/+ (F)	705.5		;;santa-maria GD 33153/+ (F)	797		UAS-Dicer/+;repoGS/santa-maria GD 33153 (F)	707.75
UAS-Dicer/+;repoGS/+ (F)	759		;;argk GD 34037/+ (F)	678.5		UAS-Dicer/+;repoGS/argk GD 34037 (F)	573.75
UAS-Dicer/+;repoGS/+ (F)	596.5		;;argk GD 34037/+ (F)	918.5		UAS-Dicer/+;repoGS/argk GD 34037 (F)	729
UAS-Dicer/+;repoGS/+ (F)	869.5		;;argk GD 34037/+ (F)	715.25		UAS-Dicer/+;repoGS/argk GD 34037 (F)	548.75
UAS-Dicer/+;repoGS/+ (F)	593.5		;;argk GD 34037/+ (F)	861		UAS-Dicer/+;repoGS/argk GD 34037 (F)	661.75
UAS-Dicer/+;repoGS/+ (F)	794		;;argk GD 34037/+ (F)	665.5		UAS-Dicer/+;repoGS/argk GD 34037 (F)	805
UAS-Dicer/+;repoGS/+ (F)	726		;;argk GD 34037/+ (F)	779.5		UAS-Dicer/+;repoGS/argk GD 34037 (F)	413.25
UAS-Dicer/+;repoGS/+ (F)	773.25		;;argk GD 34037/+ (F)	814		UAS-Dicer/+;repoGS/argk GD 34037 (F)	426.5
UAS-Dicer/+;repoGS/+ (F)	913.5		;;argk GD 34037/+ (F)	759		UAS-Dicer/+;repoGS/argk GD 34037 (F)	702.25
UAS-Dicer/+;repoGS/+ (F)	480.25		;;argk GD 34037/+ (F)	774		UAS-Dicer/+;repoGS/argk GD 34037 (F)	639.75
UAS-Dicer/+;repoGS/+ (F)	671.5		;;argk GD 34037/+ (F)	825.75		UAS-Dicer/+;repoGS/argk GD 34037 (F)	743
UAS-Dicer/+;repoGS/+ (F)	495		;;argk GD 34037/+ (F)	688.75		UAS-Dicer/+;repoGS/argk GD 34037 (F)	872.75
UAS-Dicer/+;repoGS/+ (F)	623.75		;;argk GD 34037/+ (F)	802		UAS-Dicer/+;repoGS/argk GD 34037 (F)	768
UAS-Dicer/+;repoGS/+ (F)	638.5		;;argk GD 34037/+ (F)	760		UAS-Dicer/+;repoGS/argk GD 34037 (F)	685.75
UAS-Dicer/+;repoGS/+ (F)	243		;;argk GD 34037/+ (F)	701.25		UAS-Dicer/+;repoGS/argk GD 34037 (F)	641.5
UAS-Dicer/+;repoGS/+ (F)	577		;;argk GD 34037/+ (F)	800.75		UAS-Dicer/+;repoGS/argk GD 34037 (F)	464.25
UAS-Dicer/+;repoGS/+ (F)	705.5		;;argk GD 34037/+ (F)	755.25		UAS-Dicer/+;repoGS/argk GD 34037 (F)	819.25
;;repo/+ (F)	1038.25		;stall KK 104737/+; (F)	988		;stall KK 104737/+;repo/+ (F)	907.25
;;repo/+ (F)	940		;stall KK 104737/+; (F)	871		;stall KK 104737/+;repo/+ (F)	772
;;repo/+ (F)	984.25		;stall KK 104737/+; (F)	803.25		;stall KK 104737/+;repo/+ (F)	1025.25
;;repo/+ (F)	734		;stall KK 104737/+; (F)	971		;stall KK 104737/+;repo/+ (F)	812.5
;;repo/+ (F)	822.5		;stall KK 104737/+; (F)	859.5		;stall KK 104737/+;repo/+ (F)	871.75
;;repo/+ (F)	780.5		;stall KK 104737/+; (F)	967.75		;stall KK 104737/+;repo/+ (F)	1023.25
;;repo/+ (F)	802.25		;stall KK 104737/+; (F)	1133		;stall KK 104737/+;repo/+ (F)	789.75
;;repo/+ (F)	883.25		;stall KK 104737/+; (F)	781.75		;stall KK 104737/+;repo/+ (F)	865
;;repo/+ (F)	852.5		;stall KK 104737/+; (F)	1028		;stall KK 104737/+;repo/+ (F)	750.5
;;repo/+ (F)	847		;stall KK 104737/+; (F)	935		;stall KK 104737/+;repo/+ (F)	885.25
;;repo/+ (F)	1025.25		;stall KK 104737/+; (F)	1031.75		;stall KK 104737/+;repo/+ (F)	996.25
;;repo/+ (F)	787.75		;stall KK 104737/+; (F)	1036.5		;stall KK 104737/+;repo/+ (F)	801
;;repo/+ (F)	924.5		;stall KK 104737/+; (F)	1004.5		;stall KK 104737/+;repo/+ (F)	961.25
;;repo/+ (F)	942.75		;stall KK 104737/+; (F)	1057.75		;stall KK 104737/+;repo/+ (F)	961.5
;;repo/+ (F)	1026		;stall KK 104737/+; (F)	1044.75		;stall KK 104737/+;repo/+ (F)	987
						;stall KK 104737/+;repo/+ (F)	1040.5
;;repo/+ (F)	1038.25		;ppn KK 108005/+; (F)	908.5		;ppn KK 108005/+;repo/+ (F)	886
;;repo/+ (F)	940		;ppn KK 108005/+; (F)	809		;ppn KK 108005/+;repo/+ (F)	826.75
;;repo/+ (F)	984.25		;ppn KK 108005/+; (F)	822		;ppn KK 108005/+;repo/+ (F)	837.25
;;repo/+ (F)	734		;ppn KK 108005/+; (F)	851.5		;ppn KK 108005/+;repo/+ (F)	841.75
;;repo/+ (F)	822.5		;ppn KK 108005/+; (F)	732		;ppn KK 108005/+;repo/+ (F)	882.75
;;repo/+ (F)	780.5		;ppn KK 108005/+; (F)	868.5		;ppn KK 108005/+;repo/+ (F)	970.5
;;repo/+ (F)	802.25		;ppn KK 108005/+; (F)	793.25		;ppn KK 108005/+;repo/+ (F)	747
;;repo/+ (F)	883.25		;ppn KK 108005/+; (F)	743.5		;ppn KK 108005/+;repo/+ (F)	825.5
;;repo/+ (F)	852.5		;ppn KK 108005/+; (F)	881.25		;ppn KK 108005/+;repo/+ (F)	869
;;repo/+ (F)	847		;ppn KK 108005/+; (F)	892.5		;ppn KK 108005/+;repo/+ (F)	887
;;repo/+ (F)	1025.25		;ppn KK 108005/+; (F)	1126.5		;ppn KK 108005/+;repo/+ (F)	989.25
;;repo/+ (F)	787.75		;ppn KK 108005/+; (F)	1191.75		;ppn KK 108005/+;repo/+ (F)	581.75
;;repo/+ (F)	924.5		;ppn KK 108005/+; (F)	788.5		;ppn KK 108005/+;repo/+ (F)	870.25
;;repo/+ (F)	942.75		;ppn KK 108005/+; (F)	990.25		;ppn KK 108005/+;repo/+ (F)	1009.75
;;repo/+ (F)	1026		;ppn KK 108005/+; (F)	810		;ppn KK 108005/+;repo/+ (F)	925
			;ppn KK 108005/+; (F)	778.25		;ppn KK 108005/+;repo/+ (F)	846.25
;;repo/+ (F)	1038.25		;neu3 KK 102041/+; (F)	861.25		;neu3 KK 102041/+;repo/+ (F)	992.75
;;repo/+ (F)	940		;neu3 KK 102041/+; (F)	958.25		;neu3 KK 102041/+;repo/+ (F)	1029.75
;;repo/+ (F)	984.25		;neu3 KK 102041/+; (F)	895.5		;neu3 KK 102041/+;repo/+ (F)	900.25
;;repo/+ (F)	734		;neu3 KK 102041/+; (F)	1043.25		;neu3 KK 102041/+;repo/+ (F)	971.5
;;repo/+ (F)	822.5		;neu3 KK 102041/+; (F)	810		;neu3 KK 102041/+;repo/+ (F)	865.75
;;repo/+ (F)	780.5		;neu3 KK 102041/+; (F)	913		;neu3 KK 102041/+;repo/+ (F)	1044
;;repo/+ (F)	802.25		;neu3 KK 102041/+; (F)	990		;neu3 KK 102041/+;repo/+ (F)	895.5
;;repo/+ (F)	883.25		;neu3 KK 102041/+; (F)	958.5		;neu3 KK 102041/+;repo/+ (F)	1017.75
;;repo/+ (F)	852.5		;neu3 KK 102041/+; (F)	1039		;neu3 KK 102041/+;repo/+ (F)	896
;;repo/+ (F)	847		;neu3 KK 102041/+; (F)	844.5		;neu3 KK 102041/+;repo/+ (F)	959.75
;;repo/+ (F)	1025.25		;neu3 KK 102041/+; (F)	937.75		;neu3 KK 102041/+;repo/+ (F)	1164.25
;;repo/+ (F)	787.75		;neu3 KK 102041/+; (F)	1033.25		;neu3 KK 102041/+;repo/+ (F)	798.75
;;repo/+ (F)	924.5		;neu3 KK 102041/+; (F)	940		;neu3 KK 102041/+;repo/+ (F)	1091.25
;;repo/+ (F)	942.75		;neu3 KK 102041/+; (F)	1062.5		;neu3 KK 102041/+;repo/+ (F)	1013.5
;;repo/+ (F)	1026		;neu3 KK 102041/+; (F)	773.25		;neu3 KK 102041/+;repo/+ (F)	932.75
			;neu3 KK 102041/+; (F)	777.5		;neu3 KK 102041/+;repo/+ (F)	946.5
;;repo/+ (F)	1038.25		;;acon GD 11767/+ (F)	770		;;acon GD 11767/repo (F)	1005.5
;;repo/+ (F)	940		;;acon GD 11767/+ (F)	1094.75		;;acon GD 11767/repo (F)	1025.5
;;repo/+ (F)	984.25		;;acon GD 11767/+ (F)	711.5		;;acon GD 11767/repo (F)	898.5
;;repo/+ (F)	734		;;acon GD 11767/+ (F)	848.5		;;acon GD 11767/repo (F)	1121.5
;;repo/+ (F)	822.5		;;acon GD 11767/+ (F)	955		;;acon GD 11767/repo (F)	1110.25
;;repo/+ (F)	780.5		;;acon GD 11767/+ (F)	1004.5		;;acon GD 11767/repo (F)	955
;;repo/+ (F)	802.25		;;acon GD 11767/+ (F)	1004.75		;;acon GD 11767/repo (F)	1077.75
;;repo/+ (F)	883.25		;;acon GD 11767/+ (F)	808		;;acon GD 11767/repo (F)	1064.75
;;repo/+ (F)	852.5		;;acon GD 11767/+ (F)	608		;;acon GD 11767/repo (F)	1097.25
;;repo/+ (F)	847		;;acon GD 11767/+ (F)	954		;;acon GD 11767/repo (F)	930.75
;;repo/+ (F)	1025.25		;;acon GD 11767/+ (F)	987.25		;;acon GD 11767/repo (F)	980.75
;;repo/+ (F)	787.75		;;acon GD 11767/+ (F)	763.5		;;acon GD 11767/repo (F)	1019.25
;;repo/+ (F)	924.5		;;acon GD 11767/+ (F)	739.25		;;acon GD 11767/repo (F)	1167.75
;;repo/+ (F)	942.75		;;acon GD 11767/+ (F)	631		;;acon GD 11767/repo (F)	1076.25
;;repo/+ (F)	1026		;;acon GD 11767/+ (F)	863		;;acon GD 11767/repo (F)	1104.5
			;;acon GD 11767/+ (F)	880.5		;;acon GD 11767/repo (F)	1000
;;repo/+ (F)	1038.25		;tctp GD 45532/+; (F)	830.75		;tctp GD 45532/+;repo/+ (F)	932
;;repo/+ (F)	940		;tctp GD 45532/+; (F)	740.75		;tctp GD 45532/+;repo/+ (F)	841.5
;;repo/+ (F)	984.25		;tctp GD 45532/+; (F)	828.5		;tctp GD 45532/+;repo/+ (F)	748
;;repo/+ (F)	734		;tctp GD 45532/+; (F)	784.5		;tctp GD 45532/+;repo/+ (F)	945.5
;;repo/+ (F)	822.5		;tctp GD 45532/+; (F)	652.75		;tctp GD 45532/+;repo/+ (F)	944.25
;;repo/+ (F)	780.5		;tctp GD 45532/+; (F)	838.5		;tctp GD 45532/+;repo/+ (F)	836
;;repo/+ (F)	802.25		;tctp GD 45532/+; (F)	726.75		;tctp GD 45532/+;repo/+ (F)	865.75
;;repo/+ (F)	883.25		;tctp GD 45532/+; (F)	638.5		;tctp GD 45532/+;repo/+ (F)	598.25
;;repo/+ (F)	852.5		;tctp GD 45532/+; (F)	686.75
;;repo/+ (F)	847		;tctp GD 45532/+; (F)	650.75
;;repo/+ (F)	1025.25		;tctp GD 45532/+; (F)	754.75
;;repo/+ (F)	787.75		;tctp GD 45532/+; (F)	564.75
;;repo/+ (F)	924.5		;tctp GD 45532/+; (F)	1138.75
;;repo/+ (F)	942.75		;tctp GD 45532/+; (F)	666.25
;;repo/+ (F)	1026		;tctp GD 45532/+; (F)	683.5
			;tctp GD 45532/+; (F)	838.25
UAS-Dicer/+;repoGS/+ (F)	429.5		;nuf KK 104172/+; (F)	764.5		;nuf KK 104172/UAS-Dicer;repoGS/+ (F)	541
UAS-Dicer/+;repoGS/+ (F)	464.25		;nuf KK 104172/+; (F)	933.25		;nuf KK 104172/UAS-Dicer;repoGS/+ (F)	685
UAS-Dicer/+;repoGS/+ (F)	420.75		;nuf KK 104172/+; (F)	759.25		;nuf KK 104172/UAS-Dicer;repoGS/+ (F)	713.5
UAS-Dicer/+;repoGS/+ (F)	605.5		;nuf KK 104172/+; (F)	948.75		;nuf KK 104172/UAS-Dicer;repoGS/+ (F)	665.75
UAS-Dicer/+;repoGS/+ (F)	757		;nuf KK 104172/+; (F)	699.25		;nuf KK 104172/UAS-Dicer;repoGS/+ (F)	701.5
UAS-Dicer/+;repoGS/+ (F)	889.75		;nuf KK 104172/+; (F)	538.75		;nuf KK 104172/UAS-Dicer;repoGS/+ (F)	857.75
UAS-Dicer/+;repoGS/+ (F)	704		;nuf KK 104172/+; (F)	970		;nuf KK 104172/UAS-Dicer;repoGS/+ (F)	735.25
UAS-Dicer/+;repoGS/+ (F)	691.25		;nuf KK 104172/+; (F)	758.5		;nuf KK 104172/UAS-Dicer;repoGS/+ (F)	729
UAS-Dicer/+;repoGS/+ (F)	523.75		;nuf KK 104172/+; (F)	781.25		;nuf KK 104172/UAS-Dicer;repoGS/+ (F)	369.25
UAS-Dicer/+;repoGS/+ (F)	620.5		;nuf KK 104172/+; (F)	718		;nuf KK 104172/UAS-Dicer;repoGS/+ (F)	556
UAS-Dicer/+;repoGS/+ (F)	706.5		;nuf KK 104172/+; (F)	721.75		;nuf KK 104172/UAS-Dicer;repoGS/+ (F)	775.5
UAS-Dicer/+;repoGS/+ (F)	688.25		;nuf KK 104172/+; (F)	734.25		;nuf KK 104172/UAS-Dicer;repoGS/+ (F)	716.25
UAS-Dicer/+;repoGS/+ (F)	627.5		;nuf KK 104172/+; (F)	878.75		;nuf KK 104172/UAS-Dicer;repoGS/+ (F)	627.25
UAS-Dicer/+;repoGS/+ (F)	619.5		;nuf KK 104172/+; (F)	619.25		;nuf KK 104172/UAS-Dicer;repoGS/+ (F)	709.25
UAS-Dicer/+;repoGS/+ (F)	529.75		;nuf KK 104172/+; (F)	710		;nuf KK 104172/UAS-Dicer;repoGS/+ (F)	1003.25
UAS-Dicer/+;repoGS/+ (F)	809.75		;nuf KK 104172/+; (F)	639		;nuf KK 104172/UAS-Dicer;repoGS/+ (F)	682
UAS-Dicer/+;repoGS/+ (F)	708		;CG8036 KK 105633/+; (F)	988		UAS-Dicer/CG8036 KK 105633;repoGS/+ (F)	1097
UAS-Dicer/+;repoGS/+ (F)	802.5		;CG8036 KK 105633/+; (F)	1029.5		UAS-Dicer/CG8036 KK 105633;repoGS/+ (F)	963
UAS-Dicer/+;repoGS/+ (F)	282.75		;CG8036 KK 105633/+; (F)	847.5		UAS-Dicer/CG8036 KK 105633;repoGS/+ (F)	999.5
UAS-Dicer/+;repoGS/+ (F)	513.5		;CG8036 KK 105633/+; (F)	842.25		UAS-Dicer/CG8036 KK 105633;repoGS/+ (F)	994.25
UAS-Dicer/+;repoGS/+ (F)	482.75		;CG8036 KK 105633/+; (F)	889.25		UAS-Dicer/CG8036 KK 105633;repoGS/+ (F)	1055
UAS-Dicer/+;repoGS/+ (F)	504		;CG8036 KK 105633/+; (F)	883		UAS-Dicer/CG8036 KK 105633;repoGS/+ (F)	973.5
UAS-Dicer/+;repoGS/+ (F)	850		;CG8036 KK 105633/+; (F)	939.75		UAS-Dicer/CG8036 KK 105633;repoGS/+ (F)	820.5
UAS-Dicer/+;repoGS/+ (F)	753.25		;CG8036 KK 105633/+; (F)	800.75		UAS-Dicer/CG8036 KK 105633;repoGS/+ (F)	1071.25
UAS-Dicer/+;repoGS/+ (F)	616		;CG8036 KK 105633/+; (F)	963.75		UAS-Dicer/CG8036 KK 105633;repoGS/+ (F)	1145.75
UAS-Dicer/+;repoGS/+ (F)	699		;CG8036 KK 105633/+; (F)	968.5		UAS-Dicer/CG8036 KK 105633;repoGS/+ (F)	1005
UAS-Dicer/+;repoGS/+ (F)	896.75		;CG8036 KK 105633/+; (F)	951.75		UAS-Dicer/CG8036 KK 105633;repoGS/+ (F)	1005
UAS-Dicer/+;repoGS/+ (F)	582.5		;CG8036 KK 105633/+; (F)	771.5
UAS-Dicer/+;repoGS/+ (F)	492.5		;CG8036 KK 105633/+; (F)	840.25
UAS-Dicer/+;repoGS/+ (F)	534.25		;CG8036 KK 105633/+; (F)	968.75
UAS-Dicer/+;repoGS/+ (F)	645.5		;CG8036 KK 105633/+; (F)	882.5
UAS-Dicer/+;repoGS/+ (F)	626.5		;CG8036 KK 105633/+; (F)	885.25
UAS-Dicer/+;repoGS/+ (F)	708		;ctp KK 109084/+; (F)	838.25		UAS-Dicer/ctp KK 109084;repoGS/+ (F)	689
UAS-Dicer/+;repoGS/+ (F)	802.5		;ctp KK 109084/+; (F)	912		UAS-Dicer/ctp KK 109084;repoGS/+ (F)	715.25
UAS-Dicer/+;repoGS/+ (F)	282.75		;ctp KK 109084/+; (F)	868.25		UAS-Dicer/ctp KK 109084;repoGS/+ (F)	823
UAS-Dicer/+;repoGS/+ (F)	513.5		;ctp KK 109084/+; (F)	996.75		UAS-Dicer/ctp KK 109084;repoGS/+ (F)	658.75
UAS-Dicer/+;repoGS/+ (F)	482.75		;ctp KK 109084/+; (F)	744.75		UAS-Dicer/ctp KK 109084;repoGS/+ (F)	704.75
UAS-Dicer/+;repoGS/+ (F)	504		;ctp KK 109084/+; (F)	957.5		UAS-Dicer/ctp KK 109084;repoGS/+ (F)	745.5
UAS-Dicer/+;repoGS/+ (F)	850		;ctp KK 109084/+; (F)	707.75		UAS-Dicer/ctp KK 109084;repoGS/+ (F)	832
UAS-Dicer/+;repoGS/+ (F)	753.25		;ctp KK 109084/+; (F)	876.5		UAS-Dicer/ctp KK 109084;repoGS/+ (F)	766
UAS-Dicer/+;repoGS/+ (F)	616		;ctp KK 109084/+; (F)	824.5		UAS-Dicer/ctp KK 109084;repoGS/+ (F)	680.75
UAS-Dicer/+;repoGS/+ (F)	699		;ctp KK 109084/+; (F)	797		UAS-Dicer/ctp KK 109084;repoGS/+ (F)	1176.5
UAS-Dicer/+;repoGS/+ (F)	896.75		;ctp KK 109084/+; (F)	1000		UAS-Dicer/ctp KK 109084;repoGS/+ (F)	575
UAS-Dicer/+;repoGS/+ (F)	582.5		;ctp KK 109084/+; (F)	991.75		UAS-Dicer/ctp KK 109084;repoGS/+ (F)	608.25
UAS-Dicer/+;repoGS/+ (F)	492.5		;ctp KK 109084/+; (F)	823.5		UAS-Dicer/ctp KK 109084;repoGS/+ (F)	527.25
UAS-Dicer/+;repoGS/+ (F)	534.25		;ctp KK 109084/+; (F)	602.5		UAS-Dicer/ctp KK 109084;repoGS/+ (F)	724.25
UAS-Dicer/+;repoGS/+ (F)	645.5		;ctp KK 109084/+; (F)	904
UAS-Dicer/+;repoGS/+ (F)	626.5		;ctp KK 109084/+; (F)	986.75
UAS-Dicer/+;repoGS/+ (F)	708		;vinc KK 105956/+; (F)	604		UAS-Dicer/vinc KK 105956;repoGS/+ (F)	1046.5
UAS-Dicer/+;repoGS/+ (F)	802.5		;vinc KK 105956/+; (F)	831.25		UAS-Dicer/vinc KK 105956;repoGS/+ (F)	735
UAS-Dicer/+;repoGS/+ (F)	282.75		;vinc KK 105956/+; (F)	590.25		UAS-Dicer/vinc KK 105956;repoGS/+ (F)	907.25
UAS-Dicer/+;repoGS/+ (F)	513.5		;vinc KK 105956/+; (F)	1069.5		UAS-Dicer/vinc KK 105956;repoGS/+ (F)	894.25
UAS-Dicer/+;repoGS/+ (F)	482.75		;vinc KK 105956/+; (F)	810.5		UAS-Dicer/vinc KK 105956;repoGS/+ (F)	755
UAS-Dicer/+;repoGS/+ (F)	504		;vinc KK 105956/+; (F)	774.75		UAS-Dicer/vinc KK 105956;repoGS/+ (F)	760.5
UAS-Dicer/+;repoGS/+ (F)	850		;vinc KK 105956/+; (F)	715.5		UAS-Dicer/vinc KK 105956;repoGS/+ (F)	886.75
UAS-Dicer/+;repoGS/+ (F)	753.25		;vinc KK 105956/+; (F)	872		UAS-Dicer/vinc KK 105956;repoGS/+ (F)	957.25
UAS-Dicer/+;repoGS/+ (F)	616		;vinc KK 105956/+; (F)	1251.75		UAS-Dicer/vinc KK 105956;repoGS/+ (F)	769.75
UAS-Dicer/+;repoGS/+ (F)	699		;vinc KK 105956/+; (F)	780		UAS-Dicer/vinc KK 105956;repoGS/+ (F)	681
UAS-Dicer/+;repoGS/+ (F)	896.75		;vinc KK 105956/+; (F)	1222.25		UAS-Dicer/vinc KK 105956;repoGS/+ (F)	754.25
UAS-Dicer/+;repoGS/+ (F)	582.5		;vinc KK 105956/+; (F)	876		UAS-Dicer/vinc KK 105956;repoGS/+ (F)	892
UAS-Dicer/+;repoGS/+ (F)	492.5		;vinc KK 105956/+; (F)	777.75		UAS-Dicer/vinc KK 105956;repoGS/+ (F)	774.25
UAS-Dicer/+;repoGS/+ (F)	534.25		;vinc KK 105956/+; (F)	871		UAS-Dicer/vinc KK 105956;repoGS/+ (F)	712.25
UAS-Dicer/+;repoGS/+ (F)	645.5		;vinc KK 105956/+; (F)	1037.5		UAS-Dicer/vinc KK 105956;repoGS/+ (F)	715.75
UAS-Dicer/+;repoGS/+ (F)	626.5		;vinc KK 105956/+; (F)	1085.5
UAS-Dicer/+;repoGS/+ (F)	708		;Vha16 KK 104490/+; (F)	1149.5		UAS-Dicer/Vha16 KK 104490;repoGS/+ (F)	1152.75
UAS-Dicer/+;repoGS/+ (F)	802.5		;Vha16 KK 104490/+; (F)	758.5		UAS-Dicer/Vha16 KK 104490;repoGS/+ (F)	976.25
UAS-Dicer/+;repoGS/+ (F)	282.75		;Vha16 KK 104490/+; (F)	954		UAS-Dicer/Vha16 KK 104490;repoGS/+ (F)	1074
UAS-Dicer/+;repoGS/+ (F)	513.5		;Vha16 KK 104490/+; (F)	880.25		UAS-Dicer/Vha16 KK 104490;repoGS/+ (F)	1105.75
UAS-Dicer/+;repoGS/+ (F)	482.75		;Vha16 KK 104490/+; (F)	986.5		UAS-Dicer/Vha16 KK 104490;repoGS/+ (F)	1224.25
UAS-Dicer/+;repoGS/+ (F)	504		;Vha16 KK 104490/+; (F)	1115.75		UAS-Dicer/Vha16 KK 104490;repoGS/+ (F)	1232.5
UAS-Dicer/+;repoGS/+ (F)	850		;Vha16 KK 104490/+; (F)	1039.25		UAS-Dicer/Vha16 KK 104490;repoGS/+ (F)	1254
UAS-Dicer/+;repoGS/+ (F)	753.25		;Vha16 KK 104490/+; (F)	919.5		UAS-Dicer/Vha16 KK 104490;repoGS/+ (F)	1030
UAS-Dicer/+;repoGS/+ (F)	616		;Vha16 KK 104490/+; (F)	798.25		UAS-Dicer/Vha16 KK 104490;repoGS/+ (F)	1050
UAS-Dicer/+;repoGS/+ (F)	699		;Vha16 KK 104490/+; (F)	1056.5		UAS-Dicer/Vha16 KK 104490;repoGS/+ (F)	1112.75
UAS-Dicer/+;repoGS/+ (F)	896.75		;Vha16 KK 104490/+; (F)	731.25
UAS-Dicer/+;repoGS/+ (F)	582.5		;Vha16 KK 104490/+; (F)	964
UAS-Dicer/+;repoGS/+ (F)	492.5		;Vha16 KK 104490/+; (F)	1069.75
UAS-Dicer/+;repoGS/+ (F)	534.25		;Vha16 KK 104490/+; (F)	944.5
UAS-Dicer/+;repoGS/+ (F)	645.5		;Vha16 KK 104490/+; (F)	816.75
UAS-Dicer/+;repoGS/+ (F)	626.5		;Vha16 KK 104490/+; (F)	822.5
;UAS-Dicer/+;repoGS/+ (F)	541.5		;Arc1 KK 109141/+; (F)	967.75		;Arc1 KK 109141/UAS-Dicer;repoGS/+ (F)	640
;UAS-Dicer/+;repoGS/+ (F)	590.25		;Arc1 KK 109141/+; (F)	1058.25		;Arc1 KK 109141/UAS-Dicer;repoGS/+ (F)	835
;UAS-Dicer/+;repoGS/+ (F)	1063.25		;Arc1 KK 109141/+; (F)	853.25		;Arc1 KK 109141/UAS-Dicer;repoGS/+ (F)	771
;UAS-Dicer/+;repoGS/+ (F)	668.25		;Arc1 KK 109141/+; (F)	965.5		;Arc1 KK 109141/UAS-Dicer;repoGS/+ (F)	814.25
;UAS-Dicer/+;repoGS/+ (F)	455.75		;Arc1 KK 109141/+; (F)	693.75		;Arc1 KK 109141/UAS-Dicer;repoGS/+ (F)	993
;UAS-Dicer/+;repoGS/+ (F)	639.25		;Arc1 KK 109141/+; (F)	745.25		;Arc1 KK 109141/UAS-Dicer;repoGS/+ (F)	698.25
;UAS-Dicer/+;repoGS/+ (F)	623		;Arc1 KK 109141/+; (F)	749.75		;Arc1 KK 109141/UAS-Dicer;repoGS/+ (F)	818
;UAS-Dicer/+;repoGS/+ (F)	728.25		;Arc1 KK 109141/+; (F)	784		;Arc1 KK 109141/UAS-Dicer;repoGS/+ (F)	699
;UAS-Dicer/+;repoGS/+ (F)	462.75		;Arc1 KK 109141/+; (F)	1059		;Arc1 KK 109141/UAS-Dicer;repoGS/+ (F)	801.25
;UAS-Dicer/+;repoGS/+ (F)	542.25		;Arc1 KK 109141/+; (F)	983.75		;Arc1 KK 109141/UAS-Dicer;repoGS/+ (F)	724.5
;UAS-Dicer/+;repoGS/+ (F)	406		;Arc1 KK 109141/+; (F)	904.5		;Arc1 KK 109141/UAS-Dicer;repoGS/+ (F)	728.25
;UAS-Dicer/+;repoGS/+ (F)	478		;Arc1 KK 109141/+; (F)	1067		;Arc1 KK 109141/UAS-Dicer;repoGS/+ (F)	1075
;UAS-Dicer/+;repoGS/+ (F)	503.5		;Arc1 KK 109141/+; (F)	723.25		;Arc1 KK 109141/UAS-Dicer;repoGS/+ (F)	745.5
;UAS-Dicer/+;repoGS/+ (F)	581.75		;Arc1 KK 109141/+; (F)	1000		;Arc1 KK 109141/UAS-Dicer;repoGS/+ (F)	770.25
;UAS-Dicer/+;repoGS/+ (F)	335.25		;Arc1 KK 109141/+; (F)	821.25		;Arc1 KK 109141/UAS-Dicer;repoGS/+ (F)	832
;UAS-Dicer/+;repoGS/+ (F)	476		;Arc1 KK 109141/+; (F)	733		;Arc1 KK 109141/UAS-Dicer;repoGS/+ (F)	646.75
UAS-Dicer/+;repoGS/+ (F)	759		;snapin GD 28145/+; (F)	951		UAS-Dicer/snapin GD 28145;repoGS/+ (F)	638.75
UAS-Dicer/+;repoGS/+ (F)	596.5		;snapin GD 28145/+; (F)	873.75		UAS-Dicer/snapin GD 28145;repoGS/+ (F)	760
UAS-Dicer/+;repoGS/+ (F)	869.5		;snapin GD 28145/+; (F)	803		UAS-Dicer/snapin GD 28145;repoGS/+ (F)	600.75
UAS-Dicer/+;repoGS/+ (F)	593.5		;snapin GD 28145/+; (F)	1043.25		UAS-Dicer/snapin GD 28145;repoGS/+ (F)	974.333
UAS-Dicer/+;repoGS/+ (F)	794		;snapin GD 28145/+; (F)	801.25		UAS-Dicer/snapin GD 28145;repoGS/+ (F)	889.75
UAS-Dicer/+;repoGS/+ (F)	726		;snapin GD 28145/+; (F)	885.25		UAS-Dicer/snapin GD 28145;repoGS/+ (F)	1205.25
UAS-Dicer/+;repoGS/+ (F)	773.25		;snapin GD 28145/+; (F)	982		UAS-Dicer/snapin GD 28145;repoGS/+ (F)	726
UAS-Dicer/+;repoGS/+ (F)	913.5		;snapin GD 28145/+; (F)	805.75		UAS-Dicer/snapin GD 28145;repoGS/+ (F)	619.5
UAS-Dicer/+;repoGS/+ (F)	480.25		;snapin GD 28145/+; (F)	678.25		UAS-Dicer/snapin GD 28145;repoGS/+ (F)	1133
UAS-Dicer/+;repoGS/+ (F)	671.5		;snapin GD 28145/+; (F)	724.25		UAS-Dicer/snapin GD 28145;repoGS/+ (F)	177.5
UAS-Dicer/+;repoGS/+ (F)	495		;snapin GD 28145/+; (F)	1019.25		UAS-Dicer/snapin GD 28145;repoGS/+ (F)	795
UAS-Dicer/+;repoGS/+ (F)	623.75		;snapin GD 28145/+; (F)	942.25		UAS-Dicer/snapin GD 28145;repoGS/+ (F)	837.25
UAS-Dicer/+;repoGS/+ (F)	638.5		;snapin GD 28145/+; (F)	737.75		UAS-Dicer/snapin GD 28145;repoGS/+ (F)	690.75
UAS-Dicer/+;repoGS/+ (F)	243		;snapin GD 28145/+; (F)	901.25		UAS-Dicer/snapin GD 28145;repoGS/+ (F)	892.25
UAS-Dicer/+;repoGS/+ (F)	577		;snapin GD 28145/+; (F)	823.5		UAS-Dicer/snapin GD 28145;repoGS/+ (F)	868.75
UAS-Dicer/+;repoGS/+ (F)	705.5		;snapin GD 28145/+; (F)	592		UAS-Dicer/snapin GD 28145;repoGS/+ (F)	757.5
UAS-Dicer/+;repoGS/+ (F)	759		;snapin GD 28145/+; (F)	951		UAS-Dicer/snapin GD 28145;repoGS/+ (F)	638.75
UAS-Dicer/+;repoGS/+ (F)	596.5		;snapin GD 28145/+; (F)	873.75		UAS-Dicer/snapin GD 28145;repoGS/+ (F)	760
UAS-Dicer/+;repoGS/+ (F)	869.5		;snapin GD 28145/+; (F)	803		UAS-Dicer/snapin GD 28145;repoGS/+ (F)	600.75
UAS-Dicer/+;repoGS/+ (F)	593.5		;snapin GD 28145/+; (F)	1043.25		UAS-Dicer/snapin GD 28145;repoGS/+ (F)	974.333
UAS-Dicer/+;repoGS/+ (F)	794		;snapin GD 28145/+; (F)	801.25		UAS-Dicer/snapin GD 28145;repoGS/+ (F)	889.75
UAS-Dicer/+;repoGS/+ (F)	726		;snapin GD 28145/+; (F)	885.25		UAS-Dicer/snapin GD 28145;repoGS/+ (F)	1205.25
UAS-Dicer/+;repoGS/+ (F)	773.25		;snapin GD 28145/+; (F)	982		UAS-Dicer/snapin GD 28145;repoGS/+ (F)	726
UAS-Dicer/+;repoGS/+ (F)	913.5		;snapin GD 28145/+; (F)	805.75		UAS-Dicer/snapin GD 28145;repoGS/+ (F)	619.5
UAS-Dicer/+;repoGS/+ (F)	480.25		;snapin GD 28145/+; (F)	678.25		UAS-Dicer/snapin GD 28145;repoGS/+ (F)	1133
UAS-Dicer/+;repoGS/+ (F)	671.5		;snapin GD 28145/+; (F)	724.25		UAS-Dicer/snapin GD 28145;repoGS/+ (F)	177.5
UAS-Dicer/+;repoGS/+ (F)	495		;snapin GD 28145/+; (F)	1019.25		UAS-Dicer/snapin GD 28145;repoGS/+ (F)	795
UAS-Dicer/+;repoGS/+ (F)	623.75		;snapin GD 28145/+; (F)	942.25		UAS-Dicer/snapin GD 28145;repoGS/+ (F)	837.25
UAS-Dicer/+;repoGS/+ (F)	638.5		;snapin GD 28145/+; (F)	737.75		UAS-Dicer/snapin GD 28145;repoGS/+ (F)	690.75
UAS-Dicer/+;repoGS/+ (F)	243		;snapin GD 28145/+; (F)	901.25		UAS-Dicer/snapin GD 28145;repoGS/+ (F)	892.25
UAS-Dicer/+;repoGS/+ (F)	577		;snapin GD 28145/+; (F)	823.5		UAS-Dicer/snapin GD 28145;repoGS/+ (F)	868.75
UAS-Dicer/+;repoGS/+ (F)	705.5		;snapin GD 28145/+; (F)	592		UAS-Dicer/snapin GD 28145;repoGS/+ (F)	757.5
;;repo/+ (F)	1038.25		;CG8596 KK 109291/+; (F)	964.5		;CG8596 KK 109291/+;repo/+ (F)	684.75
;;repo/+ (F)	940		;CG8596 KK 109291/+; (F)	976.25		;CG8596 KK 109291/+;repo/+ (F)	834
;;repo/+ (F)	984.25		;CG8596 KK 109291/+; (F)	912		;CG8596 KK 109291/+;repo/+ (F)	710.25
;;repo/+ (F)	734		;CG8596 KK 109291/+; (F)	978.25		;CG8596 KK 109291/+;repo/+ (F)	789
;;repo/+ (F)	822.5		;CG8596 KK 109291/+; (F)	1026.75		;CG8596 KK 109291/+;repo/+ (F)	771.75
;;repo/+ (F)	780.5		;CG8596 KK 109291/+; (F)	1106.25		;CG8596 KK 109291/+;repo/+ (F)	868.75
;;repo/+ (F)	802.25		;CG8596 KK 109291/+; (F)	731.25		;CG8596 KK 109291/+;repo/+ (F)	720.5
;;repo/+ (F)	883.25		;CG8596 KK 109291/+; (F)	727.75		;CG8596 KK 109291/+;repo/+ (F)	913.25
;;repo/+ (F)	852.5		;CG8596 KK 109291/+; (F)	993.25		;CG8596 KK 109291/+;repo/+ (F)	917.75
;;repo/+ (F)	847		;CG8596 KK 109291/+; (F)	736.75		;CG8596 KK 109291/+;repo/+ (F)	651.5
;;repo/+ (F)	1025.25		;CG8596 KK 109291/+; (F)	998		;CG8596 KK 109291/+;repo/+ (F)	884.5
;;repo/+ (F)	787.75		;CG8596 KK 109291/+; (F)	928.5		;CG8596 KK 109291/+;repo/+ (F)	788
;;repo/+ (F)	924.5		;CG8596 KK 109291/+; (F)	1015.75		;CG8596 KK 109291/+;repo/+ (F)	806.5
;;repo/+ (F)	942.75		;CG8596 KK 109291/+; (F)	914.25		;CG8596 KK 109291/+;repo/+ (F)	734.25
;;repo/+ (F)	1026		;CG8596 KK 109291/+; (F)	784.75		;CG8596 KK 109291/+;repo/+ (F)	727.75
			;CG8596 KK 109291/+; (F)	822.5		;CG8596 KK 109291/+;repo/+ (F)	849.75
;;repo/+ (F)	945.333		nuf TriP JF01351 31493	858.333		nuf TriP JF01351 31493/repo	1033
;;repo/+ (F)	732.333		nuf TriP JF01351 31493	1084.67		nuf TriP JF01351 31493/repo	1015
;;repo/+ (F)	904.667		nuf TriP JF01351 31493	724.333		nuf TriP JF01351 31493/repo	1051.33
;;repo/+ (F)	971		nuf TriP JF01351 31493	926.333		nuf TriP JF01351 31493/repo	964.667
;;repo/+ (F)	699.333		nuf TriP JF01351 31493	878.667		nuf TriP JF01351 31493/repo	783
;;repo/+ (F)	953		nuf TriP JF01351 31493	735.667		nuf TriP JF01351 31493/repo	981
;;repo/+ (F)	718.333		nuf TriP JF01351 31493	809.667		nuf TriP JF01351 31493/repo	1026.67
;;repo/+ (F)	929.333		nuf TriP JF01351 31493	862.667		nuf TriP JF01351 31493/repo	916.333
;;repo/+ (F)	670		nuf TriP JF01351 31493	763		nuf TriP JF01351 31493/repo	1065.33
;;repo/+ (F)	701.667		nuf TriP JF01351 31493	593.333		nuf TriP JF01351 31493/repo	1149.33
;;repo/+ (F)	597.667		nuf TriP JF01351 31493	948.667		nuf TriP JF01351 31493/repo	957
;;repo/+ (F)	645.333		nuf TriP JF01351 31493	833.667		nuf TriP JF01351 31493/repo	1032.67
;;repo/+ (F)	807		nuf TriP JF01351 31493	874.667		nuf TriP JF01351 31493/repo	870.667
;;repo/+ (F)	643.667		nuf TriP JF01351 31493	825		nuf TriP JF01351 31493/repo	1158.67
;;repo/+ (F)	678		nuf TriP JF01351 31493	795.667		nuf TriP JF01351 31493/repo	1030.67
;;repo/+ (F)	712.333		nuf TriP JF01351 31493	661
UAS-Dicer/+;repoGS/+ (F)	708		;;CG4797 GD 10598/+ (F)	768.5		UAS-Dicer/+;repoGS/CG4797 GD 10598 (F)	943.75
UAS-Dicer/+;repoGS/+ (F)	802.5		;;CG4797 GD 10598/+ (F)	711.5		UAS-Dicer/+;repoGS/CG4797 GD 10598 (F)	1009
UAS-Dicer/+;repoGS/+ (F)	282.75		;;CG4797 GD 10598/+ (F)	736		UAS-Dicer/+;repoGS/CG4797 GD 10598 (F)	641.25
UAS-Dicer/+;repoGS/+ (F)	513.5		;;CG4797 GD 10598/+ (F)	926		UAS-Dicer/+;repoGS/CG4797 GD 10598 (F)	905.75
UAS-Dicer/+;repoGS/+ (F)	482.75		;;CG4797 GD 10598/+ (F)	940.25		UAS-Dicer/+;repoGS/CG4797 GD 10598 (F)	819
UAS-Dicer/+;repoGS/+ (F)	504		;;CG4797 GD 10598/+ (F)	857		UAS-Dicer/+;repoGS/CG4797 GD 10598 (F)	1021
UAS-Dicer/+;repoGS/+ (F)	850		;;CG4797 GD 10598/+ (F)	902.25		UAS-Dicer/+;repoGS/CG4797 GD 10598 (F)	825.25
UAS-Dicer/+;repoGS/+ (F)	753.25		;;CG4797 GD 10598/+ (F)	922.75		UAS-Dicer/+;repoGS/CG4797 GD 10598 (F)	745.75
UAS-Dicer/+;repoGS/+ (F)	616		;;CG4797 GD 10598/+ (F)	1013.5		UAS-Dicer/+;repoGS/CG4797 GD 10598 (F)	1108.75
UAS-Dicer/+;repoGS/+ (F)	699		;;CG4797 GD 10598/+ (F)	866.25		UAS-Dicer/+;repoGS/CG4797 GD 10598 (F)	619
UAS-Dicer/+;repoGS/+ (F)	896.75		;;CG4797 GD 10598/+ (F)	798.75		UAS-Dicer/+;repoGS/CG4797 GD 10598 (F)	244.75
UAS-Dicer/+;repoGS/+ (F)	582.5		;;CG4797 GD 10598/+ (F)	655.75		UAS-Dicer/+;repoGS/CG4797 GD 10598 (F)	863.5
UAS-Dicer/+;repoGS/+ (F)	492.5		;;CG4797 GD 10598/+ (F)	873.75		UAS-Dicer/+;repoGS/CG4797 GD 10598 (F)	810.5
UAS-Dicer/+;repoGS/+ (F)	534.25		;;CG4797 GD 10598/+ (F)	1104		UAS-Dicer/+;repoGS/CG4797 GD 10598 (F)	676.25
UAS-Dicer/+;repoGS/+ (F)	645.5		;;CG4797 GD 10598/+ (F)	1093.75		UAS-Dicer/+;repoGS/CG4797 GD 10598 (F)	975.75
UAS-Dicer/+;repoGS/+ (F)	626.5		;;CG4797 GD 10598/+ (F)	917.25
UAS-Dicer/+;repoGS/+ (F)	708		;;L(2)80717 GD 11117/+ (F)	807.25		UAS-Dicer/+;repoGS/L(2)80717 GD 11117 (F)	703
UAS-Dicer/+;repoGS/+ (F)	802.5		;;L(2)80717 GD 11117/+ (F)	973.25		UAS-Dicer/+;repoGS/L(2)80717 GD 11117 (F)	762
UAS-Dicer/+;repoGS/+ (F)	282.75		;;L(2)80717 GD 11117/+ (F)	759.25		UAS-Dicer/+;repoGS/L(2)80717 GD 11117 (F)	733
UAS-Dicer/+;repoGS/+ (F)	513.5		;;L(2)80717 GD 11117/+ (F)	949.5		UAS-Dicer/+;repoGS/L(2)80717 GD 11117 (F)	519.75
UAS-Dicer/+;repoGS/+ (F)	482.75		;;L(2)80717 GD 11117/+ (F)	796		UAS-Dicer/+;repoGS/L(2)80717 GD 11117 (F)	809.75
UAS-Dicer/+;repoGS/+ (F)	504		;;L(2)80717 GD 11117/+ (F)	797.75		UAS-Dicer/+;repoGS/L(2)80717 GD 11117 (F)	799.5
UAS-Dicer/+;repoGS/+ (F)	850		;;L(2)80717 GD 11117/+ (F)	926		UAS-Dicer/+;repoGS/L(2)80717 GD 11117 (F)	832.5
UAS-Dicer/+;repoGS/+ (F)	753.25		;;L(2)80717 GD 11117/+ (F)	811.5		UAS-Dicer/+;repoGS/L(2)80717 GD 11117 (F)	662.5
UAS-Dicer/+;repoGS/+ (F)	616		;;L(2)80717 GD 11117/+ (F)	705		UAS-Dicer/+;repoGS/L(2)80717 GD 11117 (F)	555.5
UAS-Dicer/+;repoGS/+ (F)	699		;;L(2)80717 GD 11117/+ (F)	887.75		UAS-Dicer/+;repoGS/L(2)80717 GD 11117 (F)	681.25
UAS-Dicer/+;repoGS/+ (F)	896.75		;;L(2)80717 GD 11117/+ (F)	755.5		UAS-Dicer/+;repoGS/L(2)80717 GD 11117 (F)	752.5
UAS-Dicer/+;repoGS/+ (F)	582.5		;;L(2)80717 GD 11117/+ (F)	760.5		UAS-Dicer/+;repoGS/L(2)80717 GD 11117 (F)	666.75
UAS-Dicer/+;repoGS/+ (F)	492.5		;;L(2)80717 GD 11117/+ (F)	606.5		UAS-Dicer/+;repoGS/L(2)80717 GD 11117 (F)	640.25
UAS-Dicer/+;repoGS/+ (F)	534.25		;;L(2)80717 GD 11117/+ (F)	711.5		UAS-Dicer/+;repoGS/L(2)80717 GD 11117 (F)	470
UAS-Dicer/+;repoGS/+ (F)	645.5		;;L(2)80717 GD 11117/+ (F)	589		UAS-Dicer/+;repoGS/L(2)80717 GD 11117 (F)	721.75
UAS-Dicer/+;repoGS/+ (F)	626.5
UAS-Dicer/+;repoGS/+ (F)	708		;CG3036 KK 108500/+; (F)	912.75		UAS-Dicer/CG3036 KK 108500;repoGS/+ (F)	1182.5
UAS-Dicer/+;repoGS/+ (F)	802.5		;CG3036 KK 108500/+; (F)	865		UAS-Dicer/CG3036 KK 108500;repoGS/+ (F)	1154.75
UAS-Dicer/+;repoGS/+ (F)	282.75		;CG3036 KK 108500/+; (F)	1075		UAS-Dicer/CG3036 KK 108500;repoGS/+ (F)	1217.25
UAS-Dicer/+;repoGS/+ (F)	513.5		;CG3036 KK 108500/+; (F)	1068.25		UAS-Dicer/CG3036 KK 108500;repoGS/+ (F)	1192
UAS-Dicer/+;repoGS/+ (F)	482.75		;CG3036 KK 108500/+; (F)	920.75		UAS-Dicer/CG3036 KK 108500;repoGS/+ (F)	1140.75
UAS-Dicer/+;repoGS/+ (F)	504		;CG3036 KK 108500/+; (F)	1044.75		UAS-Dicer/CG3036 KK 108500;repoGS/+ (F)	1127.5
UAS-Dicer/+;repoGS/+ (F)	850		;CG3036 KK 108500/+; (F)	832.5		UAS-Dicer/CG3036 KK 108500;repoGS/+ (F)	1172
UAS-Dicer/+;repoGS/+ (F)	753.25		;CG3036 KK 108500/+; (F)	1166.75		UAS-Dicer/CG3036 KK 108500;repoGS/+ (F)	1017.25
UAS-Dicer/+;repoGS/+ (F)	616		;CG3036 KK 108500/+; (F)	1182.25		UAS-Dicer/CG3036 KK 108500;repoGS/+ (F)	1072.25
UAS-Dicer/+;repoGS/+ (F)	699		;CG3036 KK 108500/+; (F)	920.25		UAS-Dicer/CG3036 KK 108500;repoGS/+ (F)	1067.75
UAS-Dicer/+;repoGS/+ (F)	896.75		;CG3036 KK 108500/+; (F)	965.25		UAS-Dicer/CG3036 KK 108500;repoGS/+ (F)	1066.25
UAS-Dicer/+;repoGS/+ (F)	582.5		;CG3036 KK 108500/+; (F)	1048		UAS-Dicer/CG3036 KK 108500;repoGS/+ (F)	963.5
UAS-Dicer/+;repoGS/+ (F)	492.5		;CG3036 KK 108500/+; (F)	698.25		UAS-Dicer/CG3036 KK 108500;repoGS/+ (F)	1220.25
UAS-Dicer/+;repoGS/+ (F)	534.25		;CG3036 KK 108500/+; (F)	1078.25		UAS-Dicer/CG3036 KK 108500;repoGS/+ (F)	1100.25
UAS-Dicer/+;repoGS/+ (F)	645.5		;CG3036 KK 108500/+; (F)	1002.75		UAS-Dicer/CG3036 KK 108500;repoGS/+ (F)	984
UAS-Dicer/+;repoGS/+ (F)	626.5		;CG3036 KK 108500/+; (F)	727.5		UAS-Dicer/CG3036 KK 108500;repoGS/+ (F)	917.75
UAS-Dicer/+;repoGS/+ (F)	708		;Lsd-2 KK 102269/+; (F)	662.25		UAS-Dicer/Lsd-2 KK 102269;repoGS/+ (F)	1025
UAS-Dicer/+;repoGS/+ (F)	802.5		;Lsd-2 KK 102269/+; (F)	911		UAS-Dicer/Lsd-2 KK 102269;repoGS/+ (F)	1017.25
UAS-Dicer/+;repoGS/+ (F)	282.75		;Lsd-2 KK 102269/+; (F)	855		UAS-Dicer/Lsd-2 KK 102269;repoGS/+ (F)	943.75
UAS-Dicer/+;repoGS/+ (F)	513.5		;Lsd-2 KK 102269/+; (F)	878		UAS-Dicer/Lsd-2 KK 102269;repoGS/+ (F)	1049.25
UAS-Dicer/+;repoGS/+ (F)	482.75		;Lsd-2 KK 102269/+; (F)	464.75		UAS-Dicer/Lsd-2 KK 102269;repoGS/+ (F)	918.5
UAS-Dicer/+;repoGS/+ (F)	504		;Lsd-2 KK 102269/+; (F)	795.75		UAS-Dicer/Lsd-2 KK 102269;repoGS/+ (F)	1177.25
UAS-Dicer/+;repoGS/+ (F)	850		;Lsd-2 KK 102269/+; (F)	690.5		UAS-Dicer/Lsd-2 KK 102269;repoGS/+ (F)	933.5
UAS-Dicer/+;repoGS/+ (F)	753.25		;Lsd-2 KK 102269/+; (F)	1002.75		UAS-Dicer/Lsd-2 KK 102269;repoGS/+ (F)	978.75
UAS-Dicer/+;repoGS/+ (F)	616		;Lsd-2 KK 102269/+; (F)	738.75		UAS-Dicer/Lsd-2 KK 102269;repoGS/+ (F)	865.75
UAS-Dicer/+;repoGS/+ (F)	699		;Lsd-2 KK 102269/+; (F)	695		UAS-Dicer/Lsd-2 KK 102269;repoGS/+ (F)	1008.25
UAS-Dicer/+;repoGS/+ (F)	896.75		;Lsd-2 KK 102269/+; (F)	1192.75		UAS-Dicer/Lsd-2 KK 102269;repoGS/+ (F)	804.5
UAS-Dicer/+;repoGS/+ (F)	582.5		;Lsd-2 KK 102269/+; (F)	839.75		UAS-Dicer/Lsd-2 KK 102269;repoGS/+ (F)	1054
UAS-Dicer/+;repoGS/+ (F)	492.5		;Lsd-2 KK 102269/+; (F)	874		UAS-Dicer/Lsd-2 KK 102269;repoGS/+ (F)	995.75
UAS-Dicer/+;repoGS/+ (F)	534.25		;Lsd-2 KK 102269/+; (F)	716		UAS-Dicer/Lsd-2 KK 102269;repoGS/+ (F)	982.25
UAS-Dicer/+;repoGS/+ (F)	645.5		;Lsd-2 KK 102269/+; (F)	813.25		UAS-Dicer/Lsd-2 KK 102269;repoGS/+ (F)	898.25
UAS-Dicer/+;repoGS/+ (F)	626.5		;Lsd-2 KK 102269/+; (F)	804.25		UAS-Dicer/Lsd-2 KK 102269;repoGS/+ (F)	948.5
;UAS-Dicer/+;repoGS/+ (F)	541.5		;Lrp2 Megalin KK 105071/+; (F)	847		;Lrp2 Megalin KK 105071/UAS-Dicer;repoGS/+ (F)	800.5
;UAS-Dicer/+;repoGS/+ (F)	590.25		;Lrp2 Megalin KK 105071/+; (F)	805.5		;Lrp2 Megalin KK 105071/UAS-Dicer;repoGS/+ (F)	904.25
;UAS-Dicer/+;repoGS/+ (F)	1063.25		;Lrp2 Megalin KK 105071/+; (F)	955		;Lrp2 Megalin KK 105071/UAS-Dicer;repoGS/+ (F)	967.5
;UAS-Dicer/+;repoGS/+ (F)	668.25		;Lrp2 Megalin KK 105071/+; (F)	550.75		;Lrp2 Megalin KK 105071/UAS-Dicer;repoGS/+ (F)	892.75
;UAS-Dicer/+;repoGS/+ (F)	455.75		;Lrp2 Megalin KK 105071/+; (F)	879.75		;Lrp2 Megalin KK 105071/UAS-Dicer;repoGS/+ (F)	942.25
;UAS-Dicer/+;repoGS/+ (F)	639.25		;Lrp2 Megalin KK 105071/+; (F)	755.75		;Lrp2 Megalin KK 105071/UAS-Dicer;repoGS/+ (F)	1070.75
;UAS-Dicer/+;repoGS/+ (F)	623		;Lrp2 Megalin KK 105071/+; (F)	846.25		;Lrp2 Megalin KK 105071/UAS-Dicer;repoGS/+ (F)	1050
;UAS-Dicer/+;repoGS/+ (F)	728.25		;Lrp2 Megalin KK 105071/+; (F)	812		;Lrp2 Megalin KK 105071/UAS-Dicer;repoGS/+ (F)	992
;UAS-Dicer/+;repoGS/+ (F)	462.75		;Lrp2 Megalin KK 105071/+; (F)	843.75		;Lrp2 Megalin KK 105071/UAS-Dicer;repoGS/+ (F)	964.25
;UAS-Dicer/+;repoGS/+ (F)	542.25		;Lrp2 Megalin KK 105071/+; (F)	884.75		;Lrp2 Megalin KK 105071/UAS-Dicer;repoGS/+ (F)	892.75
;UAS-Dicer/+;repoGS/+ (F)	406		;Lrp2 Megalin KK 105071/+; (F)	1268.25		;Lrp2 Megalin KK 105071/UAS-Dicer;repoGS/+ (F)	947.75
;UAS-Dicer/+;repoGS/+ (F)	478		;Lrp2 Megalin KK 105071/+; (F)	903.75		;Lrp2 Megalin KK 105071/UAS-Dicer;repoGS/+ (F)	956.75
;UAS-Dicer/+;repoGS/+ (F)	503.5		;Lrp2 Megalin KK 105071/+; (F)	933.75		;Lrp2 Megalin KK 105071/UAS-Dicer;repoGS/+ (F)	949
;UAS-Dicer/+;repoGS/+ (F)	581.75		;Lrp2 Megalin KK 105071/+; (F)	900.25		;Lrp2 Megalin KK 105071/UAS-Dicer;repoGS/+ (F)	803
;UAS-Dicer/+;repoGS/+ (F)	335.25		;Lrp2 Megalin KK 105071/+; (F)	663.75		;Lrp2 Megalin KK 105071/UAS-Dicer;repoGS/+ (F)	993.25
;UAS-Dicer/+;repoGS/+ (F)	476		;Lrp2 Megalin KK 105071/+; (F)	820		;Lrp2 Megalin KK 105071/UAS-Dicer;repoGS/+ (F)	938.25
;UAS-Dicer/+;repoGS/+ (F)	541.5		;mct1 KK 106773/+; (F)	941.75		;mct1 KK 106773/UAS-Dicer;repoGS/+ (F)	858.5
;UAS-Dicer/+;repoGS/+ (F)	590.25		;mct1 KK 106773/+; (F)	753.25		;mct1 KK 106773/UAS-Dicer;repoGS/+ (F)	1040.25
;UAS-Dicer/+;repoGS/+ (F)	1063.25		;mct1 KK 106773/+; (F)	849		;mct1 KK 106773/UAS-Dicer;repoGS/+ (F)	746.75
;UAS-Dicer/+;repoGS/+ (F)	668.25		;mct1 KK 106773/+; (F)	746.5		;mct1 KK 106773/UAS-Dicer;repoGS/+ (F)	1092.75
;UAS-Dicer/+;repoGS/+ (F)	455.75		;mct1 KK 106773/+; (F)	846.5		;mct1 KK 106773/UAS-Dicer;repoGS/+ (F)	936.5
;UAS-Dicer/+;repoGS/+ (F)	639.25		;mct1 KK 106773/+; (F)	741.25		;mct1 KK 106773/UAS-Dicer;repoGS/+ (F)	904.25
;UAS-Dicer/+;repoGS/+ (F)	623		;mct1 KK 106773/+; (F)	627.75		;mct1 KK 106773/UAS-Dicer;repoGS/+ (F)	719.75
;UAS-Dicer/+;repoGS/+ (F)	728.25		;mct1 KK 106773/+; (F)	850.5		;mct1 KK 106773/UAS-Dicer;repoGS/+ (F)	887.75
;UAS-Dicer/+;repoGS/+ (F)	462.75		;mct1 KK 106773/+; (F)	903		;mct1 KK 106773/UAS-Dicer;repoGS/+ (F)	795.25
;UAS-Dicer/+;repoGS/+ (F)	542.25		;mct1 KK 106773/+; (F)	893.25		;mct1 KK 106773/UAS-Dicer;repoGS/+ (F)	869.5
;UAS-Dicer/+;repoGS/+ (F)	406		;mct1 KK 106773/+; (F)	847.25		;mct1 KK 106773/UAS-Dicer;repoGS/+ (F)	987.25
;UAS-Dicer/+;repoGS/+ (F)	478		;mct1 KK 106773/+; (F)	831		;mct1 KK 106773/UAS-Dicer;repoGS/+ (F)	809.75
;UAS-Dicer/+;repoGS/+ (F)	503.5		;mct1 KK 106773/+; (F)	929.5		;mct1 KK 106773/UAS-Dicer;repoGS/+ (F)	1234.75
;UAS-Dicer/+;repoGS/+ (F)	581.75		;mct1 KK 106773/+; (F)	935		;mct1 KK 106773/UAS-Dicer;repoGS/+ (F)	841.75
;UAS-Dicer/+;repoGS/+ (F)	335.25		;mct1 KK 106773/+; (F)	833.5		;mct1 KK 106773/UAS-Dicer;repoGS/+ (F)	798.25
;UAS-Dicer/+;repoGS/+ (F)	476					;mct1 KK 106773/UAS-Dicer;repoGS/+ (F)	860.75
;UAS-Dicer/+;repoGS/+ (F)	541.5		;Lrp1 GD 13913/+; (F)	1020.5		;Lrp1 GD 13913/UAS-Dicer;repoGS/+ (F)	560
;UAS-Dicer/+;repoGS/+ (F)	590.25		;Lrp1 GD 13913/+; (F)	811		;Lrp1 GD 13913/UAS-Dicer;repoGS/+ (F)	580.5
;UAS-Dicer/+;repoGS/+ (F)	1063.25		;Lrp1 GD 13913/+; (F)	705.25		;Lrp1 GD 13913/UAS-Dicer;repoGS/+ (F)	554.75
;UAS-Dicer/+;repoGS/+ (F)	668.25		;Lrp1 GD 13913/+; (F)	940.5		;Lrp1 GD 13913/UAS-Dicer;repoGS/+ (F)	368.75
;UAS-Dicer/+;repoGS/+ (F)	455.75		;Lrp1 GD 13913/+; (F)	849.5		;Lrp1 GD 13913/UAS-Dicer;repoGS/+ (F)	510
;UAS-Dicer/+;repoGS/+ (F)	639.25		;Lrp1 GD 13913/+; (F)	827.75		;Lrp1 GD 13913/UAS-Dicer;repoGS/+ (F)	786.25
;UAS-Dicer/+;repoGS/+ (F)	623		;Lrp1 GD 13913/+; (F)	697.5		;Lrp1 GD 13913/UAS-Dicer;repoGS/+ (F)	572.75
;UAS-Dicer/+;repoGS/+ (F)	728.25		;Lrp1 GD 13913/+; (F)	746.5		;Lrp1 GD 13913/UAS-Dicer;repoGS/+ (F)	563.75
;UAS-Dicer/+;repoGS/+ (F)	462.75		;Lrp1 GD 13913/+; (F)	789.75		;Lrp1 GD 13913/UAS-Dicer;repoGS/+ (F)	638.75
;UAS-Dicer/+;repoGS/+ (F)	542.25		;Lrp1 GD 13913/+; (F)	961		;Lrp1 GD 13913/UAS-Dicer;repoGS/+ (F)	724.75
;UAS-Dicer/+;repoGS/+ (F)	406		;Lrp1 GD 13913/+; (F)	514.25		;Lrp1 GD 13913/UAS-Dicer;repoGS/+ (F)	596
;UAS-Dicer/+;repoGS/+ (F)	478		;Lrp1 GD 13913/+; (F)	753.5		;Lrp1 GD 13913/UAS-Dicer;repoGS/+ (F)	648.25
;UAS-Dicer/+;repoGS/+ (F)	503.5		;Lrp1 GD 13913/+; (F)	775		;Lrp1 GD 13913/UAS-Dicer;repoGS/+ (F)	233
;UAS-Dicer/+;repoGS/+ (F)	581.75		;Lrp1 GD 13913/+; (F)	819.25
;UAS-Dicer/+;repoGS/+ (F)	335.25		;Lrp1 GD 13913/+; (F)	841.25
;UAS-Dicer/+;repoGS/+ (F)	476		;Lrp1 GD 13913/+; (F)	924.5
;UAS-Dicer/+;repoGS/+ (F)	541.5		;JhI-21 KK 108509/+; (F)	953		;JhI-21 KK 108509/UAS-Dicer;repoGS/+ (F)	1122.5
;UAS-Dicer/+;repoGS/+ (F)	590.25		;JhI-21 KK 108509/+; (F)	882.25		;JhI-21 KK 108509/UAS-Dicer;repoGS/+ (F)	1015.5
;UAS-Dicer/+;repoGS/+ (F)	1063.25		;JhI-21 KK 108509/+; (F)	918.25		;JhI-21 KK 108509/UAS-Dicer;repoGS/+ (F)	1056.25
;UAS-Dicer/+;repoGS/+ (F)	668.25		;JhI-21 KK 108509/+; (F)	738.75		;JhI-21 KK 108509/UAS-Dicer;repoGS/+ (F)	1129
;UAS-Dicer/+;repoGS/+ (F)	455.75		;JhI-21 KK 108509/+; (F)	1048.25		;JhI-21 KK 108509/UAS-Dicer;repoGS/+ (F)	732.5
;UAS-Dicer/+;repoGS/+ (F)	639.25		;JhI-21 KK 108509/+; (F)	647.25		;JhI-21 KK 108509/UAS-Dicer;repoGS/+ (F)	716.75
;UAS-Dicer/+;repoGS/+ (F)	623		;JhI-21 KK 108509/+; (F)	1027.25		;JhI-21 KK 108509/UAS-Dicer;repoGS/+ (F)	1205
;UAS-Dicer/+;repoGS/+ (F)	728.25		;JhI-21 KK 108509/+; (F)	991.75		;JhI-21 KK 108509/UAS-Dicer;repoGS/+ (F)	863.25
;UAS-Dicer/+;repoGS/+ (F)	462.75		;JhI-21 KK 108509/+; (F)	1019.5		;JhI-21 KK 108509/UAS-Dicer;repoGS/+ (F)	901.75
;UAS-Dicer/+;repoGS/+ (F)	542.25		;JhI-21 KK 108509/+; (F)	912		;JhI-21 KK 108509/UAS-Dicer;repoGS/+ (F)	933.5
;UAS-Dicer/+;repoGS/+ (F)	406		;JhI-21 KK 108509/+; (F)	944.25		;JhI-21 KK 108509/UAS-Dicer;repoGS/+ (F)	1221.5
;UAS-Dicer/+;repoGS/+ (F)	478		;JhI-21 KK 108509/+; (F)	910.5		;JhI-21 KK 108509/UAS-Dicer;repoGS/+ (F)	1292
;UAS-Dicer/+;repoGS/+ (F)	503.5		;JhI-21 KK 108509/+; (F)	923		;JhI-21 KK 108509/UAS-Dicer;repoGS/+ (F)	920.5
;UAS-Dicer/+;repoGS/+ (F)	581.75		;JhI-21 KK 108509/+; (F)	709		;JhI-21 KK 108509/UAS-Dicer;repoGS/+ (F)	930.25
;UAS-Dicer/+;repoGS/+ (F)	335.25		;JhI-21 KK 108509/+; (F)	806		;JhI-21 KK 108509/UAS-Dicer;repoGS/+ (F)	898.25
;UAS-Dicer/+;repoGS/+ (F)	476		;JhI-21 KK 108509/+; (F)	798.5		;JhI-21 KK 108509/UAS-Dicer;repoGS/+ (F)	751.75
;UAS-Dicer/+;repoGS/+ (F)	541.5		;Lrp1 KK 109605/+; (F)	945.75		;Lrp1 KK 109605/UAS-Dicer;repoGS/+ (F)	627
;UAS-Dicer/+;repoGS/+ (F)	590.25		;Lrp1 KK 109605/+; (F)	815.25		;Lrp1 KK 109605/UAS-Dicer;repoGS/+ (F)	614.25
;UAS-Dicer/+;repoGS/+ (F)	1063.25		;Lrp1 KK 109605/+; (F)	865.75		;Lrp1 KK 109605/UAS-Dicer;repoGS/+ (F)	375
;UAS-Dicer/+;repoGS/+ (F)	668.25		;Lrp1 KK 109605/+; (F)	850.75		;Lrp1 KK 109605/UAS-Dicer;repoGS/+ (F)	531.75
;UAS-Dicer/+;repoGS/+ (F)	455.75		;Lrp1 KK 109605/+; (F)	861.5		;Lrp1 KK 109605/UAS-Dicer;repoGS/+ (F)	639
;UAS-Dicer/+;repoGS/+ (F)	639.25		;Lrp1 KK 109605/+; (F)	747.25		;Lrp1 KK 109605/UAS-Dicer;repoGS/+ (F)	648.5
;UAS-Dicer/+;repoGS/+ (F)	623		;Lrp1 KK 109605/+; (F)	717.75		;Lrp1 KK 109605/UAS-Dicer;repoGS/+ (F)	629.75
;UAS-Dicer/+;repoGS/+ (F)	728.25		;Lrp1 KK 109605/+; (F)	927.5		;Lrp1 KK 109605/UAS-Dicer;repoGS/+ (F)	784.25
;UAS-Dicer/+;repoGS/+ (F)	462.75		;Lrp1 KK 109605/+; (F)	837.75		;Lrp1 KK 109605/UAS-Dicer;repoGS/+ (F)	761
;UAS-Dicer/+;repoGS/+ (F)	542.25		;Lrp1 KK 109605/+; (F)	798.5		;Lrp1 KK 109605/UAS-Dicer;repoGS/+ (F)	692.75
;UAS-Dicer/+;repoGS/+ (F)	406		;Lrp1 KK 109605/+; (F)	887		;Lrp1 KK 109605/UAS-Dicer;repoGS/+ (F)	699
;UAS-Dicer/+;repoGS/+ (F)	478		;Lrp1 KK 109605/+; (F)	766.25		;Lrp1 KK 109605/UAS-Dicer;repoGS/+ (F)	714.25
;UAS-Dicer/+;repoGS/+ (F)	503.5		;Lrp1 KK 109605/+; (F)	875.5		;Lrp1 KK 109605/UAS-Dicer;repoGS/+ (F)	832.75
;UAS-Dicer/+;repoGS/+ (F)	581.75		;Lrp1 KK 109605/+; (F)	932.25		;Lrp1 KK 109605/UAS-Dicer;repoGS/+ (F)	759.25
;UAS-Dicer/+;repoGS/+ (F)	335.25		;Lrp1 KK 109605/+; (F)	749.75		;Lrp1 KK 109605/UAS-Dicer;repoGS/+ (F)	702
;UAS-Dicer/+;repoGS/+ (F)	476
;UAS-Dicer/+;repoGS/+ (F)	541.5		;mnd KK 110217/+; (F)	1002.25		;mnd KK 110217/UAS-Dicer; repoGS/+ (F)	979.75
;UAS-Dicer/+;repoGS/+ (F)	590.25		;mnd KK 110217/+; (F)	483.75		;mnd KK 110217/UAS-Dicer; repoGS/+ (F)	903.5
;UAS-Dicer/+;repoGS/+ (F)	1063.25		;mnd KK 110217/+; (F)	827.25		;mnd KK 110217/UAS-Dicer; repoGS/+ (F)	1007
;UAS-Dicer/+;repoGS/+ (F)	668.25		;mnd KK 110217/+; (F)	993.5		;mnd KK 110217/UAS-Dicer; repoGS/+ (F)	1146
;UAS-Dicer/+;repoGS/+ (F)	455.75		;mnd KK 110217/+; (F)	684		;mnd KK 110217/UAS-Dicer; repoGS/+ (F)	963.75
;UAS-Dicer/+;repoGS/+ (F)	639.25		;mnd KK 110217/+; (F)	989.75		;mnd KK 110217/UAS-Dicer; repoGS/+ (F)	882
;UAS-Dicer/+;repoGS/+ (F)	623		;mnd KK 110217/+; (F)	658.75		;mnd KK 110217/UAS-Dicer; repoGS/+ (F)	1101.75
;UAS-Dicer/+;repoGS/+ (F)	728.25		;mnd KK 110217/+; (F)	811		;mnd KK 110217/UAS-Dicer; repoGS/+ (F)	761.5
;UAS-Dicer/+;repoGS/+ (F)	462.75		;mnd KK 110217/+; (F)	941.5		;mnd KK 110217/UAS-Dicer; repoGS/+ (F)	872.25
;UAS-Dicer/+;repoGS/+ (F)	542.25		;mnd KK 110217/+; (F)	820		;mnd KK 110217/UAS-Dicer; repoGS/+ (F)	853.25
;UAS-Dicer/+;repoGS/+ (F)	406		;mnd KK 110217/+; (F)	697		;mnd KK 110217/UAS-Dicer; repoGS/+ (F)	945.5
;UAS-Dicer/+;repoGS/+ (F)	478		;mnd KK 110217/+; (F)	975		;mnd KK 110217/UAS-Dicer; repoGS/+ (F)	765.75
;UAS-Dicer/+;repoGS/+ (F)	503.5		;mnd KK 110217/+; (F)	719.25		;mnd KK 110217/UAS-Dicer; repoGS/+ (F)	893
;UAS-Dicer/+;repoGS/+ (F)	581.75		;mnd KK 110217/+; (F)	907.75		;mnd KK 110217/UAS-Dicer; repoGS/+ (F)	890
;UAS-Dicer/+;repoGS/+ (F)	335.25		;mnd KK 110217/+; (F)	731.25		;mnd KK 110217/UAS-Dicer; repoGS/+ (F)	978.75
;UAS-Dicer/+;repoGS/+ (F)	476					;mnd KK 110217/UAS-Dicer; repoGS/+ (F)	970
UAS-Dicer/+;repoGS/+ (F)	759		;;CG3168 GD 48011/+ (F)	756		UAS-Dicer/+;repoGS/CG3168 GD 48011 (F)	628.5
UAS-Dicer/+;repoGS/+ (F)	596.5		;;CG3168 GD 48011/+ (F)	744		UAS-Dicer/+;repoGS/CG3168 GD 48011 (F)	772.75
UAS-Dicer/+;repoGS/+ (F)	869.5		;;CG3168 GD 48011/+ (F)	806.25		UAS-Dicer/+;repoGS/CG3168 GD 48011 (F)	756.75
UAS-Dicer/+;repoGS/+ (F)	593.5		;;CG3168 GD 48011/+ (F)	750.75		UAS-Dicer/+;repoGS/CG3168 GD 48011 (F)	556.75
UAS-Dicer/+;repoGS/+ (F)	794		;;CG3168 GD 48011/+ (F)	669.75		UAS-Dicer/+;repoGS/CG3168 GD 48011 (F)	576.5
UAS-Dicer/+;repoGS/+ (F)	726		;;CG3168 GD 48011/+ (F)	747.5		UAS-Dicer/+;repoGS/CG3168 GD 48011 (F)	596
UAS-Dicer/+;repoGS/+ (F)	773.25		;;CG3168 GD 48011/+ (F)	837.25		UAS-Dicer/+;repoGS/CG3168 GD 48011 (F)	533.5
UAS-Dicer/+;repoGS/+ (F)	913.5		;;CG3168 GD 48011/+ (F)	803.75		UAS-Dicer/+;repoGS/CG3168 GD 48011 (F)	627.25
UAS-Dicer/+;repoGS/+ (F)	480.25		;;CG3168 GD 48011/+ (F)	635.25		UAS-Dicer/+;repoGS/CG3168 GD 48011 (F)	663.25
UAS-Dicer/+;repoGS/+ (F)	671.5		;;CG3168 GD 48011/+ (F)	943.75		UAS-Dicer/+;repoGS/CG3168 GD 48011 (F)	662.25
UAS-Dicer/+;repoGS/+ (F)	495		;;CG3168 GD 48011/+ (F)	812.5		UAS-Dicer/+;repoGS/CG3168 GD 48011 (F)	767
UAS-Dicer/+;repoGS/+ (F)	623.75		;;CG3168 GD 48011/+ (F)	681		UAS-Dicer/+;repoGS/CG3168 GD 48011 (F)	426.5
UAS-Dicer/+;repoGS/+ (F)	638.5		;;CG3168 GD 48011/+ (F)	752.25		UAS-Dicer/+;repoGS/CG3168 GD 48011 (F)	671.5
UAS-Dicer/+;repoGS/+ (F)	243		;;CG3168 GD 48011/+ (F)	712.75		UAS-Dicer/+;repoGS/CG3168 GD 48011 (F)	615.25
UAS-Dicer/+;repoGS/+ (F)	577		;;CG3168 GD 48011/+ (F)	830		UAS-Dicer/+;repoGS/CG3168 GD 48011 (F)	661.5
UAS-Dicer/+;repoGS/+ (F)	705.5		;;CG3168 GD 48011/+ (F)	675		UAS-Dicer/+;repoGS/CG3168 GD 48011 (F)	539.75
;;repo/+ (F)	1038.25		;;CG6126 GD 7326/+ (F)	1112.25		;;CG6126 GD 7326/repo (F)	1151
;;repo/+ (F)	940		;;CG6126 GD 7326/+ (F)	800.25		;;CG6126 GD 7326/repo (F)	1005.5
;;repo/+ (F)	984.25		;;CG6126 GD 7326/+ (F)	1200.5		;;CG6126 GD 7326/repo (F)	1031.5
;;repo/+ (F)	734		;;CG6126 GD 7326/+ (F)	836.5		;;CG6126 GD 7326/repo (F)	889.75
;;repo/+ (F)	822.5		;;CG6126 GD 7326/+ (F)	935		;;CG6126 GD 7326/repo (F)	1023.5
;;repo/+ (F)	780.5		;;CG6126 GD 7326/+ (F)	917.75		;;CG6126 GD 7326/repo (F)	1063.5
;;repo/+ (F)	802.25		;;CG6126 GD 7326/+ (F)	945.5		;;CG6126 GD 7326/repo (F)	1090.5
;;repo/+ (F)	883.25		;;CG6126 GD 7326/+ (F)	781.5		;;CG6126 GD 7326/repo (F)	995.5
;;repo/+ (F)	852.5		;;CG6126 GD 7326/+ (F)	844		;;CG6126 GD 7326/repo (F)	848.5
;;repo/+ (F)	847		;;CG6126 GD 7326/+ (F)	837.25		;;CG6126 GD 7326/repo (F)	1054.25
;;repo/+ (F)	1025.25		;;CG6126 GD 7326/+ (F)	955.25		;;CG6126 GD 7326/repo (F)	838
;;repo/+ (F)	787.75		;;CG6126 GD 7326/+ (F)	725.5		;;CG6126 GD 7326/repo (F)	1091.75
;;repo/+ (F)	924.5		;;CG6126 GD 7326/+ (F)	925		;;CG6126 GD 7326/repo (F)	1010.5
;;repo/+ (F)	942.75		;;CG6126 GD 7326/+ (F)	889.5		;;CG6126 GD 7326/repo (F)	1010.5
;;repo/+ (F)	1026		;;CG6126 GD 7326/+ (F)	1124.5		;;CG6126 GD 7326/repo (F)	1026.25
			;;CG6126 GD 7326/+ (F)	1066.25		;;CG6126 GD 7326/repo (F)	1029
;;repo/+ (F)	1038.25		;blot KK 101083/+; (F)	916.75		;blot KK 101083/+;repo/+ (F)	796.75
;;repo/+ (F)	940		;blot KK 101083/+; (F)	698.75		;blot KK 101083/+;repo/+ (F)	994.25
;;repo/+ (F)	984.25		;blot KK 101083/+; (F)	1039.25		;blot KK 101083/+;repo/+ (F)	901.75
;;repo/+ (F)	734		;blot KK 101083/+; (F)	842.75		;blot KK 101083/+;repo/+ (F)	977.75
;;repo/+ (F)	822.5		;blot KK 101083/+; (F)	894.5		;blot KK 101083/+;repo/+ (F)	1016.5
;;repo/+ (F)	780.5		;blot KK 101083/+; (F)	854.75		;blot KK 101083/+;repo/+ (F)	879.5
;;repo/+ (F)	802.25		;blot KK 101083/+; (F)	735.25		;blot KK 101083/+;repo/+ (F)	1083.5
;;repo/+ (F)	883.25		;blot KK 101083/+; (F)	856		;blot KK 101083/+;repo/+ (F)	761.25
;;repo/+ (F)	852.5		;blot KK 101083/+; (F)	823		;blot KK 101083/+;repo/+ (F)	921.25
;;repo/+ (F)	847		;blot KK 101083/+; (F)	735.5		;blot KK 101083/+;repo/+ (F)	997.75
;;repo/+ (F)	1025.25		;blot KK 101083/+; (F)	770.25		;blot KK 101083/+;repo/+ (F)	785
;;repo/+ (F)	787.75		;blot KK 101083/+; (F)	978.25		;blot KK 101083/+;repo/+ (F)	968
;;repo/+ (F)	924.5		;blot KK 101083/+; (F)	920.75		;blot KK 101083/+;repo/+ (F)	1154.75
;;repo/+ (F)	942.75		;blot KK 101083/+; (F)	909.25		;blot KK 101083/+;repo/+ (F)	969.5
;;repo/+ (F)	1026		;blot KK 101083/+; (F)	893
			;blot KK 101083/+; (F)	945.5
;;repo/+ (F)	1038.25		;CG16700 KK 110058/+; (F)	920.75		;CG16700 KK 110058/+;repo/+ (F)	972.75
;;repo/+ (F)	940		;CG16700 KK 110058/+; (F)	845.75		;CG16700 KK 110058/+;repo/+ (F)	873.75
;;repo/+ (F)	984.25		;CG16700 KK 110058/+; (F)	901.25		;CG16700 KK 110058/+;repo/+ (F)	848.25
;;repo/+ (F)	734		;CG16700 KK 110058/+; (F)	846.5		;CG16700 KK 110058/+;repo/+ (F)	653.75
;;repo/+ (F)	822.5		;CG16700 KK 110058/+; (F)	765.25		;CG16700 KK 110058/+;repo/+ (F)	676.5
;;repo/+ (F)	780.5		;CG16700 KK 110058/+; (F)	906.25		;CG16700 KK 110058/+;repo/+ (F)	666.75
;;repo/+ (F)	802.25		;CG16700 KK 110058/+; (F)	763		;CG16700 KK 110058/+;repo/+ (F)	786.5
;;repo/+ (F)	883.25		;CG16700 KK 110058/+; (F)	1107		;CG16700 KK 110058/+;repo/+ (F)	826.5
;;repo/+ (F)	852.5		;CG16700 KK 110058/+; (F)	895.75		;CG16700 KK 110058/+;repo/+ (F)	861
;;repo/+ (F)	847		;CG16700 KK 110058/+; (F)	862.75		;CG16700 KK 110058/+;repo/+ (F)	909.5
;;repo/+ (F)	1025.25		;CG16700 KK 110058/+; (F)	995.75		;CG16700 KK 110058/+;repo/+ (F)	808.25
;;repo/+ (F)	787.75		;CG16700 KK 110058/+; (F)	905.75		;CG16700 KK 110058/+;repo/+ (F)	871.75
;;repo/+ (F)	924.5		;CG16700 KK 110058/+; (F)	1043.25		;CG16700 KK 110058/+;repo/+ (F)	889.75
;;repo/+ (F)	942.75		;CG16700 KK 110058/+; (F)	853.25		;CG16700 KK 110058/+;repo/+ (F)	763.25
;;repo/+ (F)	1026		;CG16700 KK 110058/+; (F)	854.5		;CG16700 KK 110058/+;repo/+ (F)	836.25
			;CG16700 KK 110058/+; (F)	944		;CG16700 KK 110058/+;repo/+ (F)	828.25
;;repo/+ (F)	1038.25		;Orct2 KK 106681/+; (F)	956.5		;Orct2 KK 106681/+;repo/+ (F)	762
;;repo/+ (F)	940		;Orct2 KK 106681/+; (F)	1125		;Orct2 KK 106681/+;repo/+ (F)	747.25
;;repo/+ (F)	984.25		;Orct2 KK 106681/+; (F)	974		;Orct2 KK 106681/+;repo/+ (F)	858.75
;;repo/+ (F)	734		;Orct2 KK 106681/+; (F)	910.75		;Orct2 KK 106681/+;repo/+ (F)	786
;;repo/+ (F)	822.5		;Orct2 KK 106681/+; (F)	923		;Orct2 KK 106681/+;repo/+ (F)	861.5
;;repo/+ (F)	780.5		;Orct2 KK 106681/+; (F)	1045		;Orct2 KK 106681/+;repo/+ (F)	671.5
;;repo/+ (F)	802.25		;Orct2 KK 106681/+; (F)	815.25		;Orct2 KK 106681/+;repo/+ (F)	747.25
;;repo/+ (F)	883.25		;Orct2 KK 106681/+; (F)	1002		;Orct2 KK 106681/+;repo/+ (F)	795.25
;;repo/+ (F)	852.5		;Orct2 KK 106681/+; (F)	949		;Orct2 KK 106681/+;repo/+ (F)	811.5
;;repo/+ (F)	847		;Orct2 KK 106681/+; (F)	1203		;Orct2 KK 106681/+;repo/+ (F)	975.75
;;repo/+ (F)	1025.25		;Orct2 KK 106681/+; (F)	834.5		;Orct2 KK 106681/+;repo/+ (F)	729.75
;;repo/+ (F)	787.75		;Orct2 KK 106681/+; (F)	1014.25		;Orct2 KK 106681/+;repo/+ (F)	869
;;repo/+ (F)	924.5		;Orct2 KK 106681/+; (F)	940		;Orct2 KK 106681/+;repo/+ (F)	972.25
;;repo/+ (F)	942.75		;Orct2 KK 106681/+; (F)	898.5		;Orct2 KK 106681/+;repo/+ (F)	1066.75
;;repo/+ (F)	1026		;Orct2 KK 106681/+; (F)	861.75		;Orct2 KK 106681/+;repo/+ (F)	781.5
			;Orct2 KK 106681/+; (F)	925		;Orct2 KK 106681/+;repo/+ (F)	786.5
UAS-Dicer/+;repoGS/+ (F)	429.5		;catsup KK 100095/+; (F)	868		;catsup KK 100095/UAS-Dicer;repoGS/+ (F)	884.5
UAS-Dicer/+;repoGS/+ (F)	464.25		;catsup KK 100095/+; (F)	800.75		;catsup KK 100095/UAS-Dicer;repoGS/+ (F)	1081.5
UAS-Dicer/+;repoGS/+ (F)	420.75		;catsup KK 100095/+; (F)	657.25		;catsup KK 100095/UAS-Dicer;repoGS/+ (F)	737.25
UAS-Dicer/+;repoGS/+ (F)	605.5		;catsup KK 100095/+; (F)	684.5		;catsup KK 100095/UAS-Dicer;repoGS/+ (F)	719.75
UAS-Dicer/+;repoGS/+ (F)	757		;catsup KK 100095/+; (F)	820.25		;catsup KK 100095/UAS-Dicer;repoGS/+ (F)	628
UAS-Dicer/+;repoGS/+ (F)	889.75		;catsup KK 100095/+; (F)	818		;catsup KK 100095/UAS-Dicer;repoGS/+ (F)	828
UAS-Dicer/+;repoGS/+ (F)	704		;catsup KK 100095/+; (F)	899		;catsup KK 100095/UAS-Dicer;repoGS/+ (F)	744.25
UAS-Dicer/+;repoGS/+ (F)	691.25		;catsup KK 100095/+; (F)	730.5		;catsup KK 100095/UAS-Dicer;repoGS/+ (F)	796.25
UAS-Dicer/+;repoGS/+ (F)	523.75		;catsup KK 100095/+; (F)	787		;catsup KK 100095/UAS-Dicer;repoGS/+ (F)	857
UAS-Dicer/+;repoGS/+ (F)	620.5		;catsup KK 100095/+; (F)	853.5		;catsup KK 100095/UAS-Dicer;repoGS/+ (F)	691.25
UAS-Dicer/+;repoGS/+ (F)	706.5		;catsup KK 100095/+; (F)	1023.25		;catsup KK 100095/UAS-Dicer;repoGS/+ (F)	996.25
UAS-Dicer/+;repoGS/+ (F)	688.25		;catsup KK 100095/+; (F)	855.75		;catsup KK 100095/UAS-Dicer;repoGS/+ (F)	748.5
UAS-Dicer/+;repoGS/+ (F)	627.5		;catsup KK 100095/+; (F)	773.25		;catsup KK 100095/UAS-Dicer;repoGS/+ (F)	664.5
UAS-Dicer/+;repoGS/+ (F)	619.5		;catsup KK 100095/+; (F)	754.5		;catsup KK 100095/UAS-Dicer;repoGS/+ (F)	698.5
UAS-Dicer/+;repoGS/+ (F)	529.75		;catsup KK 100095/+; (F)	674.5		;catsup KK 100095/UAS-Dicer;repoGS/+ (F)	791.25
UAS-Dicer/+;repoGS/+ (F)	809.75					;catsup KK 100095/UAS-Dicer;repoGS/+ (F)	694.5
;UAS-Dicer; repoGS/+ (F)	540.25		;UAS- KK 105566/+; (F)	925.75		;UAS- KK 105566/UAS-Dicer; repoGS/+ (F)	1136.75
;UAS-Dicer; repoGS/+ (F)	940.5		;UAS- KK 105566/+; (F)	895		;UAS- KK 105566/UAS-Dicer; repoGS/+ (F)	1053.5
;UAS-Dicer; repoGS/+ (F)	479.25		;UAS- KK 105566/+; (F)	865.75		;UAS- KK 105566/UAS-Dicer; repoGS/+ (F)	809
;UAS-Dicer; repoGS/+ (F)	531		;UAS- KK 105566/+; (F)	1046.5		;UAS- KK 105566/UAS-Dicer; repoGS/+ (F)	1019.25
;UAS-Dicer; repoGS/+ (F)	579.25		;UAS- KK 105566/+; (F)	978.25		;UAS- KK 105566/UAS-Dicer; repoGS/+ (F)	1089
;UAS-Dicer; repoGS/+ (F)	691.5		;UAS- KK 105566/+; (F)	1084.75		;UAS- KK 105566/UAS-Dicer; repoGS/+ (F)	1120.25
;UAS-Dicer; repoGS/+ (F)	746.75		;UAS- KK 105566/+; (F)	826.75		;UAS- KK 105566/UAS-Dicer; repoGS/+ (F)	1107
;UAS-Dicer; repoGS/+ (F)	656		;UAS- KK 105566/+; (F)	995.25		;UAS- KK 105566/UAS-Dicer; repoGS/+ (F)	1150.75
;UAS-Dicer; repoGS/+ (F)	928.5		;UAS- KK 105566/+; (F)	1075.5		;UAS- KK 105566/UAS-Dicer; repoGS/+ (F)	1093
;UAS-Dicer; repoGS/+ (F)	971.75		;UAS- KK 105566/+; (F)	880.75		;UAS- KK 105566/UAS-Dicer; repoGS/+ (F)	1067.25
;UAS-Dicer; repoGS/+ (F)	927.75		;UAS- KK 105566/+; (F)	944.5		;UAS- KK 105566/UAS-Dicer; repoGS/+ (F)	1124.75
;UAS-Dicer; repoGS/+ (F)	467.25		;UAS- KK 105566/+; (F)	690.5		;UAS- KK 105566/UAS-Dicer; repoGS/+ (F)	906.5
;UAS-Dicer; repoGS/+ (F)	420.75		;UAS- KK 105566/+; (F)	1129.25		;UAS- KK 105566/UAS-Dicer; repoGS/+ (F)	1153.5
;UAS-Dicer; repoGS/+ (F)	667.5		;UAS- KK 105566/+; (F)	1057.5		;UAS- KK 105566/UAS-Dicer; repoGS/+ (F)	959.75
;UAS-Dicer; repoGS/+ (F)	862.75		;UAS- KK 105566/+; (F)	1027.5		;UAS- KK 105566/UAS-Dicer; repoGS/+ (F)	1029
;UAS-Dicer; repoGS/+ (F)	711.75		;UAS- KK 105566/+; (F)	866.75		;UAS- KK 105566/UAS-Dicer; repoGS/+ (F)	1114
;UAS-Dicer; repoGS/+ (F)	540.25		;UAS- GD 52658/+; (F)	1044.75		;UAS- GD 52658/UAS-Dicer; repoGS/+ (F)	1008
;UAS-Dicer; repoGS/+ (F)	940.5		;UAS- GD 52658/+; (F)	1106.75		;UAS- GD 52658/UAS-Dicer; repoGS/+ (F)	1227.75
;UAS-Dicer; repoGS/+ (F)	479.25		;UAS- GD 52658/+; (F)	1198.25		;UAS- GD 52658/UAS-Dicer; repoGS/+ (F)	860.5
;UAS-Dicer; repoGS/+ (F)	531		;UAS- GD 52658/+; (F)	960.5		;UAS- GD 52658/UAS-Dicer; repoGS/+ (F)	688.25
;UAS-Dicer; repoGS/+ (F)	579.25		;UAS- GD 52658/+; (F)	764.75		;UAS- GD 52658/UAS-Dicer; repoGS/+ (F)	561.5
;UAS-Dicer; repoGS/+ (F)	691.5		;UAS- GD 52658/+; (F)	792.75		;UAS- GD 52658/UAS-Dicer; repoGS/+ (F)	1032.25
;UAS-Dicer; repoGS/+ (F)	746.75		;UAS- GD 52658/+; (F)	1288.25		;UAS- GD 52658/UAS-Dicer; repoGS/+ (F)	965
;UAS-Dicer; repoGS/+ (F)	656		;UAS- GD 52658/+; (F)	852		;UAS- GD 52658/UAS-Dicer; repoGS/+ (F)	980.5
;UAS-Dicer; repoGS/+ (F)	928.5		;UAS- GD 52658/+; (F)	1053.5		;UAS- GD 52658/UAS-Dicer; repoGS/+ (F)	1180.25
;UAS-Dicer; repoGS/+ (F)	971.75		;UAS- GD 52658/+; (F)	1297		;UAS- GD 52658/UAS-Dicer; repoGS/+ (F)	910.25
;UAS-Dicer; repoGS/+ (F)	927.75		;UAS- GD 52658/+; (F)	1134.5		;UAS- GD 52658/UAS-Dicer; repoGS/+ (F)	1214
;UAS-Dicer; repoGS/+ (F)	467.25		;UAS- GD 52658/+; (F)	1303.25		;UAS- GD 52658/UAS-Dicer; repoGS/+ (F)	884.5
;UAS-Dicer; repoGS/+ (F)	420.75		;UAS- GD 52658/+; (F)	888.25		;UAS- GD 52658/UAS-Dicer; repoGS/+ (F)	761.75
;UAS-Dicer; repoGS/+ (F)	667.5		;UAS- GD 52658/+; (F)	950.75		;UAS- GD 52658/UAS-Dicer; repoGS/+ (F)	977.75
;UAS-Dicer; repoGS/+ (F)	862.75		;UAS- GD 52658/+; (F)	1108		;UAS- GD 52658/UAS-Dicer; repoGS/+ (F)	821.5
;UAS-Dicer; repoGS/+ (F)	711.75		;UAS- GD 52658/+; (F)	1240.25		;UAS- GD 52658/UAS-Dicer; repoGS/+ (F)	927.5
;UAS-Dicer; repoGS/+ (F)	540.25		;UAS- GD 16652/+; (F)	675.5		;UAS- GD 16652/UAS-Dicer; repoGS/+ (F)	772
;UAS-Dicer; repoGS/+ (F)	940.5		;UAS- GD 16652/+; (F)	851.25		;UAS- GD 16652/UAS-Dicer; repoGS/+ (F)	673.5
;UAS-Dicer; repoGS/+ (F)	479.25		;UAS- GD 16652/+; (F)	1005.5		;UAS- GD 16652/UAS-Dicer; repoGS/+ (F)	595
;UAS-Dicer; repoGS/+ (F)	531		;UAS- GD 16652/+; (F)	757.25		;UAS- GD 16652/UAS-Dicer; repoGS/+ (F)	771
;UAS-Dicer; repoGS/+ (F)	579.25		;UAS- GD 16652/+; (F)	852.75		;UAS- GD 16652/UAS-Dicer; repoGS/+ (F)	704.5
;UAS-Dicer; repoGS/+ (F)	691.5		;UAS- GD 16652/+; (F)	790		;UAS- GD 16652/UAS-Dicer; repoGS/+ (F)	366.25
;UAS-Dicer; repoGS/+ (F)	746.75		;UAS- GD 16652/+; (F)	889.25		;UAS- GD 16652/UAS-Dicer; repoGS/+ (F)	1140.75
;UAS-Dicer; repoGS/+ (F)	656		;UAS- GD 16652/+; (F)	809		;UAS- GD 16652/UAS-Dicer; repoGS/+ (F)	863.75
;UAS-Dicer; repoGS/+ (F)	928.5		;UAS- GD 16652/+; (F)	890		;UAS- GD 16652/UAS-Dicer; repoGS/+ (F)	888.25
;UAS-Dicer; repoGS/+ (F)	971.75		;UAS- GD 16652/+; (F)	871.5		;UAS- GD 16652/UAS-Dicer; repoGS/+ (F)	540.5
;UAS-Dicer; repoGS/+ (F)	927.75		;UAS- GD 16652/+; (F)	874		;UAS- GD 16652/UAS-Dicer; repoGS/+ (F)	899
;UAS-Dicer; repoGS/+ (F)	467.25		;UAS- GD 16652/+; (F)	798.75		;UAS- GD 16652/UAS-Dicer; repoGS/+ (F)	584
;UAS-Dicer; repoGS/+ (F)	420.75		;UAS- GD 16652/+; (F)	716		;UAS- GD 16652/UAS-Dicer; repoGS/+ (F)	967.25
;UAS-Dicer; repoGS/+ (F)	667.5		;UAS- GD 16652/+; (F)	588.75		;UAS- GD 16652/UAS-Dicer; repoGS/+ (F)	524.25
;UAS-Dicer; repoGS/+ (F)	862.75		;UAS- GD 16652/+; (F)	863.5		;UAS- GD 16652/UAS-Dicer; repoGS/+ (F)	757.5
;UAS-Dicer; repoGS/+ (F)	711.75		;UAS- GD 16652/+; (F)	692.75		;UAS- GD 16652/UAS-Dicer; repoGS/+ (F)	841.75
;UAS-Dicer; repoGS/+ (F)	540.25		;;UAS- 47133/+ (F)	851.5		;UAS-Dicer/+;UAS- 47133/repoGS (F)	757.5
;UAS-Dicer; repoGS/+ (F)	940.5		;;UAS- 47133/+ (F)	714		;UAS-Dicer/+;UAS- 47133/repoGS (F)	432
;UAS-Dicer; repoGS/+ (F)	479.25		;;UAS- 47133/+ (F)	738.75		;UAS-Dicer/+;UAS- 47133/repoGS (F)	648.75
;UAS-Dicer; repoGS/+ (F)	531		;;UAS- 47133/+ (F)	794.25		;UAS-Dicer/+;UAS- 47133/repoGS (F)	658.75
;UAS-Dicer; repoGS/+ (F)	579.25		;;UAS- 47133/+ (F)	640.25		;UAS-Dicer/+;UAS- 47133/repoGS (F)	913.75
;UAS-Dicer; repoGS/+ (F)	691.5		;;UAS- 47133/+ (F)	835.5		;UAS-Dicer/+;UAS- 47133/repoGS (F)	710.75
;UAS-Dicer; repoGS/+ (F)	746.75		;;UAS- 47133/+ (F)	875.25		;UAS-Dicer/+;UAS- 47133/repoGS (F)	831.75
;UAS-Dicer; repoGS/+ (F)	656		;;UAS- 47133/+ (F)	876.25		;UAS-Dicer/+;UAS- 47133/repoGS (F)	703.5
;UAS-Dicer; repoGS/+ (F)	928.5		;;UAS- 47133/+ (F)	682.75		;UAS-Dicer/+;UAS- 47133/repoGS (F)	922.75
;UAS-Dicer; repoGS/+ (F)	971.75		;;UAS- 47133/+ (F)	738.25		;UAS-Dicer/+;UAS- 47133/repoGS (F)	472.25
;UAS-Dicer; repoGS/+ (F)	927.75		;;UAS- 47133/+ (F)	815.75		;UAS-Dicer/+;UAS- 47133/repoGS (F)	849
;UAS-Dicer; repoGS/+ (F)	467.25		;;UAS- 47133/+ (F)	828.75		;UAS-Dicer/+;UAS- 47133/repoGS (F)	816
;UAS-Dicer; repoGS/+ (F)	420.75		;;UAS- 47133/+ (F)	783.75		;UAS-Dicer/+;UAS- 47133/repoGS (F)	822
;UAS-Dicer; repoGS/+ (F)	667.5		;;UAS- 47133/+ (F)	658.5		;UAS-Dicer/+;UAS- 47133/repoGS (F)	784
;UAS-Dicer; repoGS/+ (F)	862.75		;;UAS- 47133/+ (F)	766.75		;UAS-Dicer/+;UAS- 47133/repoGS (F)	814.75
;UAS-Dicer; repoGS/+ (F)	711.75		;;UAS- 47133/+ (F)	680		;UAS-Dicer/+;UAS- 47133/repoGS (F)	741.75
;UAS-Dicer; repoGS/+ (F)	540.25		UAS- 6786/+;; (F)	690.75		UAS- 6786/+; UAS-Dicer/+; repoGS/+ (F)	659.75
;UAS-Dicer; repoGS/+ (F)	940.5		UAS- 6786/+;; (F)	724.5		UAS- 6786/+; UAS-Dicer/+; repoGS/+ (F)	683.25
;UAS-Dicer; repoGS/+ (F)	479.25		UAS- 6786/+;; (F)	1010.75		UAS- 6786/+; UAS-Dicer/+; repoGS/+ (F)	610.5
;UAS-Dicer; repoGS/+ (F)	531		UAS- 6786/+;; (F)	1037.75		UAS- 6786/+; UAS-Dicer/+; repoGS/+ (F)	655.75
;UAS-Dicer; repoGS/+ (F)	579.25		UAS- 6786/+;; (F)	929.75		UAS- 6786/+; UAS-Dicer/+; repoGS/+ (F)	736.25
;UAS-Dicer; repoGS/+ (F)	691.5		UAS- 6786/+;; (F)	992.75		UAS- 6786/+; UAS-Dicer/+; repoGS/+ (F)	781.75
;UAS-Dicer; repoGS/+ (F)	746.75		UAS- 6786/+;; (F)	809.25		UAS- 6786/+; UAS-Dicer/+; repoGS/+ (F)	912
;UAS-Dicer; repoGS/+ (F)	656		UAS- 6786/+;; (F)	980.75		UAS- 6786/+; UAS-Dicer/+; repoGS/+ (F)	818.25
;UAS-Dicer; repoGS/+ (F)	928.5		UAS- 6786/+;; (F)	869.75		UAS- 6786/+; UAS-Dicer/+; repoGS/+ (F)	882.5
;UAS-Dicer; repoGS/+ (F)	971.75		UAS- 6786/+;; (F)	1024.75		UAS- 6786/+; UAS-Dicer/+; repoGS/+ (F)	789
;UAS-Dicer; repoGS/+ (F)	927.75		UAS- 6786/+;; (F)	943.25		UAS- 6786/+; UAS-Dicer/+; repoGS/+ (F)	869.75
;UAS-Dicer; repoGS/+ (F)	467.25		UAS- 6786/+;; (F)	1081.5		UAS- 6786/+; UAS-Dicer/+; repoGS/+ (F)	818.5
;UAS-Dicer; repoGS/+ (F)	420.75		UAS- 6786/+;; (F)	894.5		UAS- 6786/+; UAS-Dicer/+; repoGS/+ (F)	826
;UAS-Dicer; repoGS/+ (F)	667.5		UAS- 6786/+;; (F)	704		UAS- 6786/+; UAS-Dicer/+; repoGS/+ (F)	709.5
;UAS-Dicer; repoGS/+ (F)	862.75		UAS- 6786/+;; (F)	1001.75		UAS- 6786/+; UAS-Dicer/+; repoGS/+ (F)	687.25
;UAS-Dicer; repoGS/+ (F)	711.75		UAS- 6786/+;; (F)	931.5
UAS-Dicer/+;repoGS/+ (F)	708		;lpr1 KK 106364/+; (F)	838.75		UAS-Dicer/lpr1 KK 106364;repoGS/+ (F)	851
UAS-Dicer/+;repoGS/+ (F)	802.5		;lpr1 KK 106364/+; (F)	976.75		UAS-Dicer/lpr1 KK 106364;repoGS/+ (F)	772.25
UAS-Dicer/+;repoGS/+ (F)	282.75		;lpr1 KK 106364/+; (F)	1164.5		UAS-Dicer/lpr1 KK 106364;repoGS/+ (F)	718.25
UAS-Dicer/+;repoGS/+ (F)	513.5		;lpr1 KK 106364/+; (F)	979.5		UAS-Dicer/lpr1 KK 106364;repoGS/+ (F)	489.25
UAS-Dicer/+;repoGS/+ (F)	482.75		;lpr1 KK 106364/+; (F)	918.75		UAS-Dicer/lpr1 KK 106364;repoGS/+ (F)	995.75
UAS-Dicer/+;repoGS/+ (F)	504		;lpr1 KK 106364/+; (F)	901.25		UAS-Dicer/lpr1 KK 106364;repoGS/+ (F)	922.75
UAS-Dicer/+;repoGS/+ (F)	850		;lpr1 KK 106364/+; (F)	730.75		UAS-Dicer/lpr1 KK 106364;repoGS/+ (F)	884.25
UAS-Dicer/+;repoGS/+ (F)	753.25		;lpr1 KK 106364/+; (F)	1075.75		UAS-Dicer/lpr1 KK 106364;repoGS/+ (F)	921
UAS-Dicer/+;repoGS/+ (F)	616		;lpr1 KK 106364/+; (F)	781.75		UAS-Dicer/lpr1 KK 106364;repoGS/+ (F)	956.5
UAS-Dicer/+;repoGS/+ (F)	699		;lpr1 KK 106364/+; (F)	753.75		UAS-Dicer/lpr1 KK 106364;repoGS/+ (F)	1230.5
UAS-Dicer/+;repoGS/+ (F)	896.75		;lpr1 KK 106364/+; (F)	626.25		UAS-Dicer/lpr1 KK 106364;repoGS/+ (F)	1006.25
UAS-Dicer/+;repoGS/+ (F)	582.5		;lpr1 KK 106364/+; (F)	767.75		UAS-Dicer/lpr1 KK 106364;repoGS/+ (F)	1037.5
UAS-Dicer/+;repoGS/+ (F)	492.5		;lpr1 KK 106364/+; (F)	641		UAS-Dicer/lpr1 KK 106364;repoGS/+ (F)	985.75
UAS-Dicer/+;repoGS/+ (F)	534.25		;lpr1 KK 106364/+; (F)	902.75		UAS-Dicer/lpr1 KK 106364;repoGS/+ (F)	1066.5
UAS-Dicer/+;repoGS/+ (F)	645.5		;lpr1 KK 106364/+; (F)	883.25		UAS-Dicer/lpr1 KK 106364;repoGS/+ (F)	870
UAS-Dicer/+;repoGS/+ (F)	626.5		;lpr1 KK 106364/+; (F)	716.25		UAS-Dicer/lpr1 KK 106364;repoGS/+ (F)	860.75
UAS-Dicer/+;repoGS/+ (F)	708		;;CG5687 GD 33262/+ (F)	737		UAS-Dicer/+;repoGS/CG5687 GD 33262 (F)	840
UAS-Dicer/+;repoGS/+ (F)	802.5		;;CG5687 GD 33262/+ (F)	878.5		UAS-Dicer/+;repoGS/CG5687 GD 33262 (F)	483.75
UAS-Dicer/+;repoGS/+ (F)	282.75		;;CG5687 GD 33262/+ (F)	748.5		UAS-Dicer/+;repoGS/CG5687 GD 33262 (F)	378.25
UAS-Dicer/+;repoGS/+ (F)	513.5		;;CG5687 GD 33262/+ (F)	708		UAS-Dicer/+;repoGS/CG5687 GD 33262 (F)	745.5
UAS-Dicer/+;repoGS/+ (F)	482.75		;;CG5687 GD 33262/+ (F)	808.5		UAS-Dicer/+;repoGS/CG5687 GD 33262 (F)	679.75
UAS-Dicer/+;repoGS/+ (F)	504		;;CG5687 GD 33262/+ (F)	975.25		UAS-Dicer/+;repoGS/CG5687 GD 33262 (F)	528.5
UAS-Dicer/+;repoGS/+ (F)	850		;;CG5687 GD 33262/+ (F)	833		UAS-Dicer/+;repoGS/CG5687 GD 33262 (F)	167.25
UAS-Dicer/+;repoGS/+ (F)	753.25		;;CG5687 GD 33262/+ (F)	796.25		UAS-Dicer/+;repoGS/CG5687 GD 33262 (F)	645.25
UAS-Dicer/+;repoGS/+ (F)	616		;;CG5687 GD 33262/+ (F)	826.5		UAS-Dicer/+;repoGS/CG5687 GD 33262 (F)	644.25
UAS-Dicer/+;repoGS/+ (F)	699		;;CG5687 GD 33262/+ (F)	768.5		UAS-Dicer/+;repoGS/CG5687 GD 33262 (F)	634.75
UAS-Dicer/+;repoGS/+ (F)	896.75		;;CG5687 GD 33262/+ (F)	778.75		UAS-Dicer/+;repoGS/CG5687 GD 33262 (F)	629.25
UAS-Dicer/+;repoGS/+ (F)	582.5		;;CG5687 GD 33262/+ (F)	938.25		UAS-Dicer/+;repoGS/CG5687 GD 33262 (F)	456.5
UAS-Dicer/+;repoGS/+ (F)	492.5		;;CG5687 GD 33262/+ (F)	917		UAS-Dicer/+;repoGS/CG5687 GD 33262 (F)	651.5
UAS-Dicer/+;repoGS/+ (F)	534.25		;;CG5687 GD 33262/+ (F)	964		UAS-Dicer/+;repoGS/CG5687 GD 33262 (F)	481.75
UAS-Dicer/+;repoGS/+ (F)	645.5		;;CG5687 GD 33262/+ (F)	816.75		UAS-Dicer/+;repoGS/CG5687 GD 33262 (F)	399.5
UAS-Dicer/+;repoGS/+ (F)	626.5		;;CG5687 GD 33262/+ (F)	750.5		UAS-Dicer/+;repoGS/CG5687 GD 33262 (F)	352.25
UAS-Dicer/+;repoGS/+ (F)	759		;CG6386 KK 108502/+; (F)	700.25		UAS-Dicer/CG6386 KK 108502;repoGS/+ (F)	790.75
UAS-Dicer/+;repoGS/+ (F)	596.5		;CG6386 KK 108502/+; (F)	786		UAS-Dicer/CG6386 KK 108502;repoGS/+ (F)	1178.25
UAS-Dicer/+;repoGS/+ (F)	869.5		;CG6386 KK 108502/+; (F)	956		UAS-Dicer/CG6386 KK 108502;repoGS/+ (F)	1173
UAS-Dicer/+;repoGS/+ (F)	593.5		;CG6386 KK 108502/+; (F)	1191		UAS-Dicer/CG6386 KK 108502;repoGS/+ (F)	1072
UAS-Dicer/+;repoGS/+ (F)	794		;CG6386 KK 108502/+; (F)	1080		UAS-Dicer/CG6386 KK 108502;repoGS/+ (F)	1096
UAS-Dicer/+;repoGS/+ (F)	726		;CG6386 KK 108502/+; (F)	1123.75		UAS-Dicer/CG6386 KK 108502;repoGS/+ (F)	1018
UAS-Dicer/+;repoGS/+ (F)	773.25		;CG6386 KK 108502/+; (F)	818.25		UAS-Dicer/CG6386 KK 108502;repoGS/+ (F)	923.75
UAS-Dicer/+;repoGS/+ (F)	913.5		;CG6386 KK 108502/+; (F)	914		UAS-Dicer/CG6386 KK 108502;repoGS/+ (F)	1248.25
UAS-Dicer/+;repoGS/+ (F)	480.25		;CG6386 KK 108502/+; (F)	693		UAS-Dicer/CG6386 KK 108502;repoGS/+ (F)	1225.75
UAS-Dicer/+;repoGS/+ (F)	671.5		;CG6386 KK 108502/+; (F)	624.5		UAS-Dicer/CG6386 KK 108502;repoGS/+ (F)	961.25
UAS-Dicer/+;repoGS/+ (F)	495		;CG6386 KK 108502/+; (F)	801		UAS-Dicer/CG6386 KK 108502;repoGS/+ (F)	1055.5
UAS-Dicer/+;repoGS/+ (F)	623.75		;CG6386 KK 108502/+; (F)	899.75		UAS-Dicer/CG6386 KK 108502;repoGS/+ (F)	1125
UAS-Dicer/+;repoGS/+ (F)	638.5		;CG6386 KK 108502/+; (F)	889.75		UAS-Dicer/CG6386 KK 108502;repoGS/+ (F)	1108.25
UAS-Dicer/+;repoGS/+ (F)	243		;CG6386 KK 108502/+; (F)	858.75		UAS-Dicer/CG6386 KK 108502;repoGS/+ (F)	1127.25
UAS-Dicer/+;repoGS/+ (F)	577		;CG6386 KK 108502/+; (F)	950.25		UAS-Dicer/CG6386 KK 108502;repoGS/+ (F)	1082
UAS-Dicer/+;repoGS/+ (F)	705.5		;CG6386 KK 108502/+; (F)	797.5		UAS-Dicer/CG6386 KK 108502;repoGS/+ (F)	1107
;;repo/+ (F)	945.333		Rh50 TriP HMC03067 50666	724.333		Rh50 TriP HMC03067 50666;repo	884
;;repo/+ (F)	732.333		Rh50 TriP HMC03067 50666	688.667		Rh50 TriP HMC03067 50666;repo	1046
;;repo/+ (F)	904.667		Rh50 TriP HMC03067 50666	891.333		Rh50 TriP HMC03067 50666;repo	754.667
;;repo/+ (F)	971		Rh50 TriP HMC03067 50666	864		Rh50 TriP HMC03067 50666;repo	884.333
;;repo/+ (F)	699.333		Rh50 TriP HMC03067 50666	765.667		Rh50 TriP HMC03067 50666;repo	868
;;repo/+ (F)	953		Rh50 TriP HMC03067 50666	734		Rh50 TriP HMC03067 50666;repo	927.333
;;repo/+ (F)	718.333		Rh50 TriP HMC03067 50666	768.333		Rh50 TriP HMC03067 50666;repo	793.333
;;repo/+ (F)	929.333		Rh50 TriP HMC03067 50666	622.333		Rh50 TriP HMC03067 50666;repo	845.333
;;repo/+ (F)	670		Rh50 TriP HMC03067 50666	691		Rh50 TriP HMC03067 50666;repo	1003
;;repo/+ (F)	701.667		Rh50 TriP HMC03067 50666	896.333		Rh50 TriP HMC03067 50666;repo	931.667
;;repo/+ (F)	597.667		Rh50 TriP HMC03067 50666	515.333		Rh50 TriP HMC03067 50666;repo	1043.67
;;repo/+ (F)	645.333		Rh50 TriP HMC03067 50666	736.333		Rh50 TriP HMC03067 50666;repo	843
;;repo/+ (F)	807		Rh50 TriP HMC03067 50666	929.667		Rh50 TriP HMC03067 50666;repo	898.667
;;repo/+ (F)	643.667		Rh50 TriP HMC03067 50666	610		Rh50 TriP HMC03067 50666;repo	893.667
;;repo/+ (F)	678		Rh50 TriP HMC03067 50666	752.667		Rh50 TriP HMC03067 50666;repo	773.333
;;repo/+ (F)	712.333		Rh50 TriP HMC03067 50666	587.667		Rh50 TriP HMC03067 50666;repo	837.667
;;repo/+ (F)	985		;;VMAT TRiP HMC02346/+ (F)	981.25		;;VMAT TRiP HMC02346/repo (F)	1058.5
;;repo/+ (F)	914		;;VMAT TRiP HMC02346/+ (F)	900		;;VMAT TRiP HMC02346/repo (F)	1030.75
;;repo/+ (F)	621.75		;;VMAT TRiP HMC02346/+ (F)	1012.75		;;VMAT TRiP HMC02346/repo (F)	1052.75
;;repo/+ (F)	757.75		;;VMAT TRiP HMC02346/+ (F)	1049.5		;;VMAT TRiP HMC02346/repo (F)	1068.75
;;repo/+ (F)	683.75		;;VMAT TRiP HMC02346/+ (F)	952.5		;;VMAT TRiP HMC02346/repo (F)	1156.75
;;repo/+ (F)	650.5		;;VMAT TRiP HMC02346/+ (F)	1075.25		;;VMAT TRiP HMC02346/repo (F)	919.333
;;repo/+ (F)	959.75		;;VMAT TRiP HMC02346/+ (F)	1103.25		;;VMAT TRiP HMC02346/repo (F)	1060.5
;;repo/+ (F)	638.667		;;VMAT TRiP HMC02346/+ (F)	588.75		;;VMAT TRiP HMC02346/repo (F)	966
;;repo/+ (F)	969.5		;;VMAT TRiP HMC02346/+ (F)	903.25		;;VMAT TRiP HMC02346/repo (F)	1102.75
;;repo/+ (F)	1074.75		;;VMAT TRiP HMC02346/+ (F)	1090.5		;;VMAT TRiP HMC02346/repo (F)	1126.5
;;repo/+ (F)	748.75		;;VMAT TRiP HMC02346/+ (F)	1114		;;VMAT TRiP HMC02346/repo (F)	1195.75
;;repo/+ (F)	839.25		;;VMAT TRiP HMC02346/+ (F)	617.5		;;VMAT TRiP HMC02346/repo (F)	1168.75
;;repo/+ (F)	1022		;;VMAT TRiP HMC02346/+ (F)	1023.75		;;VMAT TRiP HMC02346/repo (F)	1031
;;repo/+ (F)	1055.75		;;VMAT TRiP HMC02346/+ (F)	1176.5		;;VMAT TRiP HMC02346/repo (F)	1135.25
;;repo/+ (F)	607.5		;;VMAT TRiP HMC02346/+ (F)	1013.5		;;VMAT TRiP HMC02346/repo (F)	1032.75
;;repo/+ (F)	772.75		;;VMAT TRiP HMC02346/+ (F)	968.75		;;VMAT TRiP HMC02346/repo (F)	1075.75
