# Supplementary material for: Modulation of sleep by trafficking of lipids through the Drosophila blood-brain barrier
Source: eLife. 2023 May 4;12:e86336. doi: 10.7554/eLife.86336 (PMC10205086; doi:10.7554/eLife.86336)
Supplement: Figure 2—source data 1. [file elife-86336-fig2-data1.xlsx]

## Sheet: Sheet1
GAL4 Control	Total Sleep		UAS Control	Total Sleep		GAL4 x UAS	Total Sleep
;NP6293 G4 6xOC/+; (F)	912.5		;;VMAT TRiP.HMC02346/+ (F)	808.25		;NP6293 G4 6xOC/+;VMAT TRiP.HMC02346/+ (F)	1061.75
;NP6293 G4 6xOC/+; (F)	810.25		;;VMAT TRiP.HMC02346/+ (F)	862.5		;NP6293 G4 6xOC/+;VMAT TRiP.HMC02346/+ (F)	989.5
;NP6293 G4 6xOC/+; (F)	690.25		;;VMAT TRiP.HMC02346/+ (F)	1000.75		;NP6293 G4 6xOC/+;VMAT TRiP.HMC02346/+ (F)	1100.75
;NP6293 G4 6xOC/+; (F)	865.5		;;VMAT TRiP.HMC02346/+ (F)	1058		;NP6293 G4 6xOC/+;VMAT TRiP.HMC02346/+ (F)	1230.25
;NP6293 G4 6xOC/+; (F)	586.75		;;VMAT TRiP.HMC02346/+ (F)	950		;NP6293 G4 6xOC/+;VMAT TRiP.HMC02346/+ (F)	1184
;NP6293 G4 6xOC/+; (F)	745.5		;;VMAT TRiP.HMC02346/+ (F)	966		;NP6293 G4 6xOC/+;VMAT TRiP.HMC02346/+ (F)	1078.25
;NP6293 G4 6xOC/+; (F)	812.5		;;VMAT TRiP.HMC02346/+ (F)	1073		;NP6293 G4 6xOC/+;VMAT TRiP.HMC02346/+ (F)	1036
;NP6293 G4 6xOC/+; (F)	879.25		;;VMAT TRiP.HMC02346/+ (F)	930.75		;NP6293 G4 6xOC/+;VMAT TRiP.HMC02346/+ (F)	1016.25
;NP6293 G4 6xOC/+; (F)	646.5		;;VMAT TRiP.HMC02346/+ (F)	695.5		;NP6293 G4 6xOC/+;VMAT TRiP.HMC02346/+ (F)	909
;NP6293 G4 6xOC/+; (F)	758		;;VMAT TRiP.HMC02346/+ (F)	834.5		;NP6293 G4 6xOC/+;VMAT TRiP.HMC02346/+ (F)	1182.75
;NP6293 G4 6xOC/+; (F)	805.25		;;VMAT TRiP.HMC02346/+ (F)	883		;NP6293 G4 6xOC/+;VMAT TRiP.HMC02346/+ (F)	1173.5
;NP6293 G4 6xOC/+; (F)	744.5		;;VMAT TRiP.HMC02346/+ (F)	1016.5		;NP6293 G4 6xOC/+;VMAT TRiP.HMC02346/+ (F)	1069.25
;NP6293 G4 6xOC/+; (F)	725.75		;;VMAT TRiP.HMC02346/+ (F)	804.25		;NP6293 G4 6xOC/+;VMAT TRiP.HMC02346/+ (F)	1153.25
;NP6293 G4 6xOC/+; (F)	851.75		;;VMAT TRiP.HMC02346/+ (F)	754.75		;NP6293 G4 6xOC/+;VMAT TRiP.HMC02346/+ (F)	1078
;NP6293 G4 6xOC/+; (F)	896		;;VMAT TRiP.HMC02346/+ (F)	705		;NP6293 G4 6xOC/+;VMAT TRiP.HMC02346/+ (F)	1132.5
;NP6293 G4 6xOC/+; (F)	828.333		;;VMAT TRiP.HMC02346/+ (F)	856.333		;NP6293 G4 6xOC/+;VMAT TRiP.HMC02346/+ (F)	972.75
;NP6293 G4 6xOC/+; (F)	951.333		;;VMAT TRiP.HMC02346/+ (F)	828.667		;NP6293 G4 6xOC/+;VMAT TRiP.HMC02346/+ (F)	971
;NP6293 G4 6xOC/+; (F)	917		;;VMAT TRiP.HMC02346/+ (F)	967.333		;NP6293 G4 6xOC/+;VMAT TRiP.HMC02346/+ (F)	1098.67
;NP6293 G4 6xOC/+; (F)	846		;;VMAT TRiP.HMC02346/+ (F)	782.333		;NP6293 G4 6xOC/+;VMAT TRiP.HMC02346/+ (F)	1074
;NP6293 G4 6xOC/+; (F)	958.667		;;VMAT TRiP.HMC02346/+ (F)	951.667		;NP6293 G4 6xOC/+;VMAT TRiP.HMC02346/+ (F)	1160.33
;NP6293 G4 6xOC/+; (F)	803		;;VMAT TRiP.HMC02346/+ (F)	959.667		;NP6293 G4 6xOC/+;VMAT TRiP.HMC02346/+ (F)	1058.67
;NP6293 G4 6xOC/+; (F)	494		;;VMAT TRiP.HMC02346/+ (F)	803.333		;NP6293 G4 6xOC/+;VMAT TRiP.HMC02346/+ (F)	1143
;NP6293 G4 6xOC/+; (F)	434.667		;;VMAT TRiP.HMC02346/+ (F)	933.333		;NP6293 G4 6xOC/+;VMAT TRiP.HMC02346/+ (F)	1107
;NP6293 G4 6xOC/+; (F)	784.667		;;VMAT TRiP.HMC02346/+ (F)	1059.67		;NP6293 G4 6xOC/+;VMAT TRiP.HMC02346/+ (F)	971
;NP6293 G4 6xOC/+; (F)	857.667		;;VMAT TRiP.HMC02346/+ (F)	888.667		;NP6293 G4 6xOC/+;VMAT TRiP.HMC02346/+ (F)	913.667
;NP6293 G4 6xOC/+; (F)	923.667		;;VMAT TRiP.HMC02346/+ (F)	1076.33		;NP6293 G4 6xOC/+;VMAT TRiP.HMC02346/+ (F)	1072.67
;NP6293 G4 6xOC/+; (F)	1001.33		;;VMAT TRiP.HMC02346/+ (F)	954.667		;NP6293 G4 6xOC/+;VMAT TRiP.HMC02346/+ (F)	1133.67
;NP6293 G4 6xOC/+; (F)	830.667		;;VMAT TRiP.HMC02346/+ (F)	938.667		;NP6293 G4 6xOC/+;VMAT TRiP.HMC02346/+ (F)	1083.67
;NP6293 G4 6xOC/+; (F)	965.667		;;VMAT TRiP.HMC02346/+ (F)	924.667		;NP6293 G4 6xOC/+;VMAT TRiP.HMC02346/+ (F)	1032.67
;NP6293 G4 6xOC/+; (F)	794		;;VMAT TRiP.HMC02346/+ (F)	940.667		;NP6293 G4 6xOC/+;VMAT TRiP.HMC02346/+ (F)	1218.67
;NP6293 G4 6xOC/+; (F)	1066.33		;;VMAT TRiP.HMC02346/+ (F)	952		;NP6293 G4 6xOC/+;VMAT TRiP.HMC02346/+ (F)	1069.33
;NP6293 G4 6xOC/+; (F)	932.667		;;VMAT TRiP.HMC02346/+ (F)	1011.67		;NP6293 G4 6xOC/+;VMAT TRiP.HMC02346/+ (F)	1059.67
;NP6293 G4 6xOC/+; (F)	1035		;;VMAT TRiP.HMC02346/+ (F)	1004		;NP6293 G4 6xOC/+;VMAT TRiP.HMC02346/+ (F)	1016.33
;NP6293 G4 6xOC/+; (F)	964.333		;;VMAT TRiP.HMC02346/+ (F)	925		;NP6293 G4 6xOC/+;VMAT TRiP.HMC02346/+ (F)	1068.67
;NP6293 G4 6xOC/+; (F)	884.667		;;VMAT TRiP.HMC02346/+ (F)	846.333		;NP6293 G4 6xOC/+;VMAT TRiP.HMC02346/+ (F)	1150
;NP6293 G4 6xOC/+; (F)	969.333		;;VMAT TRiP.HMC02346/+ (F)	1017		;NP6293 G4 6xOC/+;VMAT TRiP.HMC02346/+ (F)	1060.33
;NP6293 G4 6xOC/+; (F)	579.667		;;VMAT TRiP.HMC02346/+ (F)	1049.67		;NP6293 G4 6xOC/+;VMAT TRiP.HMC02346/+ (F)	1059
;NP6293 G4 6xOC/+; (F)	716.667		;;VMAT TRiP.HMC02346/+ (F)	922		;NP6293 G4 6xOC/+;VMAT TRiP.HMC02346/+ (F)	1094.33
;NP6293 G4 6xOC/+; (F)	868		;;VMAT TRiP.HMC02346/+ (F)	1043		;NP6293 G4 6xOC/+;VMAT TRiP.HMC02346/+ (F)	1081.33
;NP6293 G4 6xOC/+; (F)	710		;;VMAT TRiP.HMC02346/+ (F)	828.333		;NP6293 G4 6xOC/+;VMAT TRiP.HMC02346/+ (F)	1061.67
;NP6293 G4 6xOC/+; (F)	826.333		;;VMAT TRiP.HMC02346/+ (F)	1014.33		;NP6293 G4 6xOC/+;VMAT TRiP.HMC02346/+ (F)	1103.67
;NP6293 G4 6xOC/+; (F)	894		;;VMAT TRiP.HMC02346/+ (F)	1005		;NP6293 G4 6xOC/+;VMAT TRiP.HMC02346/+ (F)	1038.67
;NP6293 G4 6xOC/+; (F)	670.333		;;VMAT TRiP.HMC02346/+ (F)	930.333		;NP6293 G4 6xOC/+;VMAT TRiP.HMC02346/+ (F)	1100.33
;NP6293 G4 6xOC/+; (F)	821.333		;;VMAT TRiP.HMC02346/+ (F)	993.333		;NP6293 G4 6xOC/+;VMAT TRiP.HMC02346/+ (F)	1011
;NP6293 G4 6xOC/+; (F)	752.667		;;VMAT TRiP.HMC02346/+ (F)	946.333		;NP6293 G4 6xOC/+;VMAT TRiP.HMC02346/+ (F)	1052
;NP6293 G4 6xOC/+; (F)	975.667		;;VMAT TRiP.HMC02346/+ (F)	901.333		;NP6293 G4 6xOC/+;VMAT TRiP.HMC02346/+ (F)	1133.67
;NP6293 G4 6xOC/+; (F)	995.333		;;VMAT TRiP.HMC02346/+ (F)	917.667		;NP6293 G4 6xOC/+;VMAT TRiP.HMC02346/+ (F)	1074.67
;NP6293 G4 6xOC/+; (F)	714					;NP6293 G4 6xOC/+;VMAT TRiP.HMC02346/+ (F)	968

## Sheet: Sheet2
GAL4 Control	rD aLSE	rD aNSE	rN aLSE	rN aNSE	AI	rDS	rNS		UAS Control	rD aLSE	rD aNSE	rN aLSE	rN aNSE	AI	rDS	rNS		GAL4 x UAS	rD aLSE	rD aNSE	rN aLSE	rN aNSE	AI	rDS	rNS
;NP6293 G4 6xOC/+; (F)	27.6821	14	117.008	5.66667	1.97149	329.333	599.333		;;VMAT TRiP.HMC02346/+ (F)	16.1401	17.3333	60.3269	10.3333	1.5389	271	551.667		;NP6293 G4 6xOC/+;VMAT TRiP.HMC02346/+ (F)	16.1808	23.6667	191.852	5	1.31018	369.333	653.333
;NP6293 G4 6xOC/+; (F)	17.9639	18.3333	75.0873	9	1.71416	306.333	581		;;VMAT TRiP.HMC02346/+ (F)	16.1892	14.6667	27.8011	20.3333	1.31359	233.333	492.333		;NP6293 G4 6xOC/+;VMAT TRiP.HMC02346/+ (F)	31.8804	14.6667	59.5337	10	1.37707	440	591
;NP6293 G4 6xOC/+; (F)	35.6981	11	101.458	6	1.80897	310	580.667		;;VMAT TRiP.HMC02346/+ (F)	41.7167	11.6667	84.9024	9.33333	1.39322	338.667	586.667		;NP6293 G4 6xOC/+;VMAT TRiP.HMC02346/+ (F)	15.8719	24.3333	78.9833	9	1.12593	370	612.667
;NP6293 G4 6xOC/+; (F)	32.0549	9.33333	127.185	6.33333	1.33881	274.667	637.333		;;VMAT TRiP.HMC02346/+ (F)	24.2075	10.6667	46.0476	13	1.18282	142.333	511		;NP6293 G4 6xOC/+;VMAT TRiP.HMC02346/+ (F)	33.3852	15.3333	165.069	6.33333	1.22793	483.667	656.667
;NP6293 G4 6xOC/+; (F)	33.1427	13.3333	41.4748	19	2.06983	434.333	495		;;VMAT TRiP.HMC02346/+ (F)	27.4413	12	330.333	3.33333	1.686	323	658.667		;NP6293 G4 6xOC/+;VMAT TRiP.HMC02346/+ (F)	25.7262	18	74.6587	9	1.42698	432.333	633
;NP6293 G4 6xOC/+; (F)	4.23087	17.6667	41.7183	12.6667	1.41841	74.3333	527.667		;;VMAT TRiP.HMC02346/+ (F)	14.2011	16	285.017	7.33333	1.31442	227	634.667		;NP6293 G4 6xOC/+;VMAT TRiP.HMC02346/+ (F)	42.6984	14.3333	158.13	6.66667	1.45412	459	635.667
;NP6293 G4 6xOC/+; (F)	11.4296	13	39.2513	11	2.1929	146	413.667		;;VMAT TRiP.HMC02346/+ (F)	9.5204	19.3333	83.8131	9	1.27927	178.333	581		;NP6293 G4 6xOC/+;VMAT TRiP.HMC02346/+ (F)	30.9907	14.6667	123.171	6.66667	1.76402	425.333	640
;NP6293 G4 6xOC/+; (F)	12.513	20.3333	27.2708	18	1.49273	253.667	482.333		;;VMAT TRiP.HMC02346/+ (F)	14.3241	12	166.96	6	1.30028	169	638.667		;NP6293 G4 6xOC/+;VMAT TRiP.HMC02346/+ (F)	21.2805	18.6667	181.4	5	2.47223	354.667	633
;NP6293 G4 6xOC/+; (F)	28.0089	12	54.0628	10.3333	2.38659	294.333	513		;;VMAT TRiP.HMC02346/+ (F)	26.6207	16.6667	167.737	7.66667	1.45377	354	623.667		;NP6293 G4 6xOC/+;VMAT TRiP.HMC02346/+ (F)	15.9802	21	43.7542	13.3333	2.45501	325.667	540.333
;NP6293 G4 6xOC/+; (F)	16.5013	20.6667	79.2111	8	1.70471	335	603.333		;;VMAT TRiP.HMC02346/+ (F)	10.3218	17.6667	69.3111	9	1.30734	175.667	616.667		;NP6293 G4 6xOC/+;VMAT TRiP.HMC02346/+ (F)	20.3317	21.6667	82.0333	8	1.51297	438.333	634.333
;NP6293 G4 6xOC/+; (F)	19.5558	16.6667	92.9291	7	1.7531	318.667	614.667		;;VMAT TRiP.HMC02346/+ (F)	28.5863	12.6667	114.933	5.66667	1.40992	333.667	636		;NP6293 G4 6xOC/+;VMAT TRiP.HMC02346/+ (F)	32.115	14.3333	116.933	5.66667	1.28658	440	644
;NP6293 G4 6xOC/+; (F)	11.96	18.3333	87.2833	7	1.4212	219	581.667		;;VMAT TRiP.HMC02346/+ (F)	27.8019	14.6667	62.0595	9.33333	1.61056	313.333	548		;NP6293 G4 6xOC/+;VMAT TRiP.HMC02346/+ (F)	24.791	18.3333	363.867	4.33333	1.06072	448.667	660.333
;NP6293 G4 6xOC/+; (F)	23.864	16.6667	126.5	7	1.4791	372.333	617.333		;;VMAT TRiP.HMC02346/+ (F)	9.90833	19.6667	100.264	11	1.08022	186.333	613.333		;NP6293 G4 6xOC/+;VMAT TRiP.HMC02346/+ (F)	18.817	21	134.278	6	1.94877	374.667	644.667
;NP6293 G4 6xOC/+; (F)	14.8076	20	50.5541	11.3333	1.3818	277.333	555		;;VMAT TRiP.HMC02346/+ (F)	17.3364	15.3333	56.7937	12.3333	1.69006	261.667	545.333		;NP6293 G4 6xOC/+;VMAT TRiP.HMC02346/+ (F)	33.2323	15.6667	373.833	2.66667	1.26088	515.667	704.667
;NP6293 G4 6xOC/+; (F)	26.6568	16	67.7566	9	1.62023	374.333	588.667		;;VMAT TRiP.HMC02346/+ (F)	22.2293	14	54.7944	11	1.17166	291.333	561		;NP6293 G4 6xOC/+;VMAT TRiP.HMC02346/+ (F)	30.7597	15.3333	216.517	3.66667	0.97976	470.667	679
;NP6293 G4 6xOC/+; (F)	20.4176	15.3333	305.333	4	1.25975	285.333	637		;;VMAT TRiP.HMC02346/+ (F)	18.5912	17	97.6389	7.33333	1.49086	306	580.333		;NP6293 G4 6xOC/+;VMAT TRiP.HMC02346/+ (F)	19.5775	22.6667	83.4028	8.33333	1.18105	391.333	608.333
;NP6293 G4 6xOC/+; (F)	41.1338	10.3333	113.431	6	2.15501	410.333	624.667		;;VMAT TRiP.HMC02346/+ (F)	17.1417	22.3333	165.322	5.33333	1.27174	372.667	639		;NP6293 G4 6xOC/+;VMAT TRiP.HMC02346/+ (F)	22.8723	18	107.389	6	1.59151	372	644.333
;NP6293 G4 6xOC/+; (F)	20.9341	13.6667	236.422	3.33333	2.47215	284.667	680		;;VMAT TRiP.HMC02346/+ (F)	40.6638	13.3333	50.9667	13	1.27159	413.333	590.667		;NP6293 G4 6xOC/+;VMAT TRiP.HMC02346/+ (F)	28.1159	16.6667	84.5717	8.33333	1.24345	449	619.667
;NP6293 G4 6xOC/+; (F)	15.5974	17.6667	131.939	5	2.26216	243.667	641		;;VMAT TRiP.HMC02346/+ (F)	28.1019	15.3333	27.0873	21	1.15599	414	511		;NP6293 G4 6xOC/+;VMAT TRiP.HMC02346/+ (F)	40.735	12.6667	141.567	4.66667	1.59019	497	653
;NP6293 G4 6xOC/+; (F)	20.4561	18.3333	97.1429	6.33333	1.7887	373.333	596		;;VMAT TRiP.HMC02346/+ (F)	20.2213	17	35.6008	15.3333	1.23182	326.667	519.667		;NP6293 G4 6xOC/+;VMAT TRiP.HMC02346/+ (F)	29.7468	15.6667	89.75	8	1.22913	422	638.333
;NP6293 G4 6xOC/+; (F)	10.3079	11	45.9152	10.3333	2.01702	105.333	474.333		;;VMAT TRiP.HMC02346/+ (F)	20.0397	24	41.2382	14	1.2973	441.333	575.667		;NP6293 G4 6xOC/+;VMAT TRiP.HMC02346/+ (F)	46.0282	10.6667	47.9818	12.3333	1.05362	480	579
;NP6293 G4 6xOC/+; (F)	17.0056	13.3333	106.933	4.66667	2.31369	222.667	494		;;VMAT TRiP.HMC02346/+ (F)	20.657	22	69.3449	10.3333	1.26023	447.667	602		;NP6293 G4 6xOC/+;VMAT TRiP.HMC02346/+ (F)	42.2034	12.6667	40.7758	14.6667	1.70426	523	571.333
;NP6293 G4 6xOC/+; (F)	11.7362	18.6667	152.583	4.33333	2.1693	213.333	654.667		;;VMAT TRiP.HMC02346/+ (F)	20.3208	20	52.97	14.3333	1.42696	399.667	522.333		;NP6293 G4 6xOC/+;VMAT TRiP.HMC02346/+ (F)	26.7655	15.3333	337.852	4.33333	1.61558	400.667	680.667
;NP6293 G4 6xOC/+; (F)	8.85185	16.3333	107.789	5.33333	1.99446	142.333	567.667		;;VMAT TRiP.HMC02346/+ (F)	31.8409	13	179.175	4.33333	1.22931	383	660		;NP6293 G4 6xOC/+;VMAT TRiP.HMC02346/+ (F)	23.284	19	161.198	4.66667	1.08928	398	663.667
;NP6293 G4 6xOC/+; (F)	7.83377	25	367.167	2.33333	1.45811	194.333	632.333		;;VMAT TRiP.HMC02346/+ (F)	17.1859	19.3333	30.3779	17.3333	0.953836	306	522.333		;NP6293 G4 6xOC/+;VMAT TRiP.HMC02346/+ (F)	21.6561	19.3333	368.75	2.66667	1.33608	414.333	689.333
;NP6293 G4 6xOC/+; (F)	28.4682	11	168.6	3.66667	2.12444	311.667	582.333		;;VMAT TRiP.HMC02346/+ (F)	34.588	12.6667	251.635	10	1.36162	429.333	585		;NP6293 G4 6xOC/+;VMAT TRiP.HMC02346/+ (F)	16.7655	24.3333	97.4667	7.66667	1.49542	396.667	642
;NP6293 G4 6xOC/+; (F)	14.4825	16.6667	69.625	9.33333	1.44904	236.667	433.667		;;VMAT TRiP.HMC02346/+ (F)	26.1073	15	92.9804	9.66667	1.61252	391.333	613.667		;NP6293 G4 6xOC/+;VMAT TRiP.HMC02346/+ (F)	21.5777	19.3333	267.278	2.66667	1.31283	414	686.333
;NP6293 G4 6xOC/+; (F)	26.4848	9.66667	125.524	5	1.9017	240.667	580.667		;;VMAT TRiP.HMC02346/+ (F)	25.4214	16.6667	29.3508	18.6667	1.17571	416.333	514		;NP6293 G4 6xOC/+;VMAT TRiP.HMC02346/+ (F)	23.8403	18	143.984	9.33333	1.7794	388.333	622.667
;NP6293 G4 6xOC/+; (F)	12.0451	17	118.333	6	2.03807	203	549.667		;;VMAT TRiP.HMC02346/+ (F)	24.8562	14.3333	280.619	7.66667	1.2082	338.333	655		;NP6293 G4 6xOC/+;VMAT TRiP.HMC02346/+ (F)	20.5542	20.6667	150.567	9.33333	1.6638	411.333	640.667
;NP6293 G4 6xOC/+; (F)	18.5035	17.6667	198.667	3.33333	1.93141	325	650.667		;;VMAT TRiP.HMC02346/+ (F)	16.7312	20.3333	109.844	7	1.41357	338.667	607.667		;NP6293 G4 6xOC/+;VMAT TRiP.HMC02346/+ (F)	26.7667	18	136.417	5.33333	1.23503	481.333	652.333
;NP6293 G4 6xOC/+; (F)	17.5364	17	547.222	1.66667	1.47384	297.667	697.667		;;VMAT TRiP.HMC02346/+ (F)	18.7448	17.3333	49.1436	12	1.37447	320.667	580.667		;NP6293 G4 6xOC/+;VMAT TRiP.HMC02346/+ (F)	21.7053	21.6667	77.8148	9.66667	1.14129	469	605.667
;NP6293 G4 6xOC/+; (F)	14.756	14	77.7121	7.66667	2.11121	203.333	510.667		;;VMAT TRiP.HMC02346/+ (F)	26.0818	13.3333	78.9333	8.33333	1.41075	331.333	586.333		;NP6293 G4 6xOC/+;VMAT TRiP.HMC02346/+ (F)	14.5761	21	282.45	6.33333	1.41505	307.333	660.667
