# Supplementary material for: Modulation of sleep by trafficking of lipids through the Drosophila blood-brain barrier
Source: eLife. 2023 May 4;12:e86336. doi: 10.7554/eLife.86336 (PMC10205086; doi:10.7554/eLife.86336)
Supplement: Figure 3—figure supplement 1—source data 1. [file elife-86336-fig3-figsupp1-data1.xlsx]

## Sheet: Sheet1
GAL4 Control	rD aLSE	rD aNSE	rN aLSE	rN aNSE	AI	rDS	rNS		UAS Control	rD aLSE	rD aNSE	rN aLSE	rN aNSE	AI	rDS	rNS		GAL4 x UAS	rD aLSE	rD aNSE	rN aLSE	rN aNSE	AI	rDS	rNS
;;repo G4/+ (F)	13.9148	17.6667	109.767	5.33333	1.58953	245.333	581.333		;105071/+;8397/+ (F)	15.9278	15	39.3671	17	2.09048	215.667	519.667		;105071/+;8397/repo G4 (F)	27.1732	14.3333	256.111	3.33333	1.50719	380.333	656
;;repo G4/+ (F)	2.62963	7	41.1013	13.3333	1.55738	19	543.667		;105071/+;8397/+ (F)	10.3658	21.6667	203.111	4	1.46399	224.667	656.333		;105071/+;8397/repo G4 (F)	36.5791	12.3333	123.64	5.33333	1.54738	435.667	623
;;repo G4/+ (F)	95.254	5.66667	249	2.66667	2.20902	453	639.333		;105071/+;8397/+ (F)	14.9929	13.3333	322.397	3.66667	2.46337	185	636.333		;105071/+;8397/repo G4 (F)	12.3361	23	69.2111	11	1.02359	282	568.333
;;repo G4/+ (F)	43.1376	11.3333	96.1063	8.33333	1.20911	398.333	641.333		;105071/+;8397/+ (F)	9.4902	14.3333	38.1083	15.3333	1.37353	136	530.333		;105071/+;8397/repo G4 (F)	22.1181	17	119.752	5.33333	1.66993	368.667	603.667
;;repo G4/+ (F)	25.7278	12.3333	72.0111	9.33333	1.53248	309	571		;105071/+;8397/+ (F)	4.95022	9.66667	25.826	19	1.2507	47	474.333		;105071/+;8397/repo G4 (F)	12.8393	20.3333	75.9722	8.33333	1.42243	257	557.667
;;repo G4/+ (F)	14.6359	19.6667	296.778	5.33333	1.39284	259	665		;105071/+;8397/+ (F)	16.0815	19.3333	55.5145	16	1.90182	298	521.333		;105071/+;8397/repo G4 (F)	16.9759	23.3333	82.9957	7.66667	1.39622	387.667	563.333
;;repo G4/+ (F)	11.6817	19	62.4625	14.6667	1.66874	215.667	579.333		;105071/+;8397/+ (F)	13.9217	22.3333	135.679	6.33333	1.47674	302	638.333		;105071/+;8397/repo G4 (F)	18.9852	20.3333	168.167	5.66667	1.55005	385.667	625.667
;;repo G4/+ (F)	20.1451	20.3333	88.0905	7.33333	1.66033	349.333	594.333		;105071/+;8397/+ (F)	12.7472	17.6667	33.6627	18.6667	1.94042	215	529.667		;105071/+;8397/repo G4 (F)	15.7693	22	114.761	7	1.30353	336.333	638
;;repo G4/+ (F)	56.1593	8.66667	211.017	3.66667	1.65973	418.667	661.333		;105071/+;8397/+ (F)	28.2514	14.3333	134.377	11.3333	2.13485	397.667	588.667		;105071/+;8397/repo G4 (F)	25.1202	15.6667	120.802	7	1.53465	384.333	571.667
;;repo G4/+ (F)	19.2763	12	53.4476	14	1.2546	205.333	603		;105071/+;8397/+ (F)						389	718		;105071/+;8397/repo G4 (F)	40.858	11.3333	159.383	4	1.5004	407	606.667
;;repo G4/+ (F)	11.8606	13.3333	120.984	9.66667	1.04374	142.333	598		;105071/+;8397/+ (F)	31.7357	12.6667	278.532	6	1.98008	359.667	646.667		;105071/+;8397/repo G4 (F)	22.1404	16.3333	129.533	5	1.59728	354	627.333
;;repo G4/+ (F)	6.5091	15.6667	32.0881	16	1.33515	102	492.333		;105071/+;8397/+ (F)	18.0658	14	39.6601	14.6667	1.23538	204	560.667		;105071/+;8397/repo G4 (F)	17.1638	19.3333	65.4423	9.33333	1.20447	323.667	599.333
;;repo G4/+ (F)	54.0303	9	359.133	4.33333	1.53387	416.333	647.333		;105071/+;8397/+ (F)	4.69608	16.6667	30.3727	17	1.10302	78.3333	464		;105071/+;8397/repo G4 (F)	42.5095	11.3333	99.0963	6.33333	1.8575	465.667	576.667
;;repo G4/+ (F)	40.0444	12.3333	81.0455	7.66667	1.76741	329.667	567.333		;105071/+;8397/+ (F)	19.8869	15.3333	36.7611	15.6667	1.76396	303	544.667		;105071/+;8397/repo G4 (F)	14.6395	25	160.2	5.33333	1.51917	349.667	610.333
;;repo G4/+ (F)	32.9962	8.33333	33.3889	16.3333	1.38646	256.667	527.667		;105071/+;8397/+ (F)	10.2481	19	39.7879	15.6667	1.36856	194.667	563.333		;105071/+;8397/repo G4 (F)	14.1818	22.3333	170.858	6	1.15123	316.667	619.333
;;repo G4/+ (F)	22.9852	13.6667	70.6222	11.6667	1.91838	273.667	616.667		;105071/+;8397/+ (F)	12.1489	20	70.4544	9	1.38328	244.333	603		;105071/+;8397/repo G4 (F)	37.3649	13	232.278	3	1.11551	425.333	637.333
;;repo G4/+ (F)	7.98061	12.75	37.411	11.75	3.47558	96.5	427		;105071/+;8397/+ (F)	29.5283	11	73.1312	8	2.16209	309	566		;105071/+;8397/repo G4 (F)	17.2874	20.75	207.417	7.5	1.59712	310	577.75
;;repo G4/+ (F)	11.3466	16.5	50.0812	11.5	1.73102	191	526.75		;105071/+;8397/+ (F)	36.7094	10.25	110.594	5.75	1.98515	334.25	620		;105071/+;8397/repo G4 (F)	20.9391	18.75	178.958	3.75	1.53121	357	616.5
;;repo G4/+ (F)	9.34464	11.25	25.1935	15.75	1.90593	114	384.75		;105071/+;8397/+ (F)	25.9798	15.5	142.361	8.25	1.51272	389	594.75		;105071/+;8397/repo G4 (F)	31.826	11.5	314.452	4	2.16615	324.25	683.75
;;repo G4/+ (F)	22.7784	15.5	117.236	6	1.65709	318.25	601.5		;105071/+;8397/+ (F)	12.5103	24.75	173.15	4.5	1.88678	280.5	633		;105071/+;8397/repo G4 (F)	18.4189	13.5	203.036	4	1.27933	245.25	658
;;repo G4/+ (F)	20.9673	7.75	167.754	4.75	1.66619	119.25	557.75		;105071/+;8397/+ (F)	15.7142	15.25	100.34	6	2.09843	223	582.25		;105071/+;8397/repo G4 (F)	46.0466	11.25	270.958	2.5	1.10922	438	653.75
;;repo G4/+ (F)	30.2521	14.5	171	4.25	1.75731	362.5	587.25		;105071/+;8397/+ (F)	9.30619	23.5	212.511	9.25	1.79027	211.5	595.5		;105071/+;8397/repo G4 (F)	8.96656	15.5	136	5	1.2235	127	614.25
;;repo G4/+ (F)	55.1637	8.5	107.278	7.75	1.55599	406	599.5		;105071/+;8397/+ (F)	16.8222	16.5	160.237	5.25	1.97287	275.25	598.75		;105071/+;8397/repo G4 (F)	31.7561	14.75	143.886	5.5	2.06324	419	614.25
;;repo G4/+ (F)	32.3169	9.5	112.688	6	1.96139	257.75	592.75		;105071/+;8397/+ (F)	19.4018	9.5	66.9036	9.5	2.26441	175.25	559.75		;105071/+;8397/repo G4 (F)	36.8705	12.5	175.475	4	2.08207	384.75	601
;;repo G4/+ (F)	17.6205	16	190.2	4	1.89239	231.5	629		;105071/+;8397/+ (F)	33.136	12.25	110.781	6	2.08188	324	624		;105071/+;8397/repo G4 (F)	22.8225	13.75	298.375	3.25	1.29358	295	626
;;repo G4/+ (F)	11.8	9.25	50.6916	12	2.18474	126.25	549		;105071/+;8397/+ (F)	25.3369	14.5	116.363	7.75	1.44061	366.5	576.5		;105071/+;8397/repo G4 (F)	13.1491	21.75	142.108	5	1.63298	279.25	622.75
;;repo G4/+ (F)	9.55737	14.5	151.452	9	1.53092	135	556		;105071/+;8397/+ (F)	15.2636	14.5	82.8275	7.75	1.8704	187.5	582.5		;105071/+;8397/repo G4 (F)	13.9216	24.75	301.2	3	1.74261	301.75	624.5
;;repo G4/+ (F)	25.7377	13.5	75.5635	9.75	1.90162	281.5	565.5		;105071/+;8397/+ (F)	24.9423	16.5	35.4851	19.5	1.52878	377	547.5		;105071/+;8397/repo G4 (F)	22.3319	21	351.188	2.25	1.48842	338.5	618.75
;;repo G4/+ (F)	28.7233	12.5	150.531	9.25	1.99304	306	557.25		;105071/+;8397/+ (F)	31.102	13.5	81.8958	8	1.80547	332.75	527.75		;105071/+;8397/repo G4 (F)	23.0909	13.75	77.7194	9.75	1.54429	279	552
;;repo G4/+ (F)	14.4863	11.5	86.0938	10	1.59662	133	492.75		;105071/+;8397/+ (F)	17.9597	16	107.249	6.25	1.90191	271	639.25		;105071/+;8397/repo G4 (F)	25.1444	12	137.129	5	1.66528	288	619
;;repo G4/+ (F)	56.2634	8.25	179.46	5.25	1.71976	338	648.25		;105071/+;8397/+ (F)	20.1048	14.75	94.9869	6.25	1.87114	293.75	580.25		;105071/+;8397/repo G4 (F)	29.8987	12.5	119.518	7	2.05911	353	576
;;repo G4/+ (F)	41.9827	8.75	160.475	4	1.8278	316.5	621.25		;105071/+;8397/+ (F)	10.5138	17.5	66.4525	9.5	1.66547	181.25	556.25		;105071/+;8397/repo G4 (F)	57.6893	7.25	210.417	3.5	1.86998	397.5	595.25
	rD aLSE	rD aNSE	rN aLSE	rN aNSE	AI	rDS	rNS			rD aLSE	rD aNSE	rN aLSE	rN aNSE	AI	rDS	rNS			rD aLSE	rD aNSE	rN aLSE	rN aNSE	AI	rDS	rNS
;NP6293 G4/+; (F)	41.1338	10.3333	113.431	6	2.15501	410.333	624.667		;105071/+;8397/+ (F)	25.3853	8.66667	122.317	6.33333	1.43416	194	620.667		;105071/NP6293 G4;8397/+ (F)	8.93682	17.6667	211.867	3.66667	1.85806	157.667	663.333
;NP6293 G4/+; (F)	20.9341	13.6667	236.422	3.33333	2.47215	284.667	680		;105071/+;8397/+ (F)	25.6319	12.3333	74.881	9.33333	1.67844	291	612		;105071/NP6293 G4;8397/+ (F)	24.9586	14.3333	67.2916	12	1.58855	331.333	574
;NP6293 G4/+; (F)	15.5974	17.6667	131.939	5	2.26216	243.667	641		;105071/+;8397/+ (F)	35.754	8.66667	162.267	4.33333	1.47631	288.333	663.333		;105071/NP6293 G4;8397/+ (F)	14.6958	19	132.85	5	1.93983	275.667	648.667
;NP6293 G4/+; (F)	20.4561	18.3333	97.1429	6.33333	1.7887	373.333	596		;105071/+;8397/+ (F)	28.3994	12.3333	72.5154	9.66667	1.05917	344.333	628.667		;105071/NP6293 G4;8397/+ (F)	6.77381	11.6667	94.3148	8.33333	1.35482	77	623.333
;NP6293 G4/+; (F)	10.3079	11	45.9152	10.3333	2.01702	105.333	474.333		;105071/+;8397/+ (F)	47.1704	8	53.7841	11.6667	1.46808	334.333	568		;105071/NP6293 G4;8397/+ (F)	19.3361	15.3333	160.556	4	1.85917	297	587.667
;NP6293 G4/+; (F)	17.0056	13.3333	106.933	4.66667	2.31369	222.667	494		;105071/+;8397/+ (F)	99.5873	5	262.417	8.33333	1.85248	444	626.333		;105071/NP6293 G4;8397/+ (F)	12.9437	17.6667	102.057	6.33333	1.48203	226.333	627.333
;NP6293 G4/+; (F)	11.7362	18.6667	152.583	4.33333	2.1693	213.333	654.667		;105071/+;8397/+ (F)	48.4569	8.66667	29.4347	16.3333	1.62586	261.667	477		;105071/NP6293 G4;8397/+ (F)	30.004	11	212.333	3	1.85845	292.667	637
;NP6293 G4/+; (F)	8.85185	16.3333	107.789	5.33333	1.99446	142.333	567.667		;105071/+;8397/+ (F)	83.0833	4	113.299	8.33333	1.72678	332.333	583.667		;105071/NP6293 G4;8397/+ (F)	16.3034	23.6667	154.6	4.33333	1.32707	342.333	662.333
;NP6293 G4/+; (F)	7.83377	25	367.167	2.33333	1.45811	194.333	632.333		;105071/+;8397/+ (F)	27.9587	10.3333	48.5325	11.6667	1.64092	260.333	530.333		;105071/NP6293 G4;8397/+ (F)	6.42444	22.3333	141.063	7	1.48414	145.667	632.667
;NP6293 G4/+; (F)	28.4682	11	168.6	3.66667	2.12444	311.667	582.333		;105071/+;8397/+ (F)	18.4833	12.3333	112.631	6	1.60429	224	607.333		;105071/NP6293 G4;8397/+ (F)	26.4191	15.6667	366.192	5.33333	1.27896	410	666.667
;NP6293 G4/+; (F)	14.4825	16.6667	69.625	9.33333	1.44904	236.667	433.667		;105071/+;8397/+ (F)	30.2402	8	67.5806	9.66667	1.71002	213.667	560.333		;105071/NP6293 G4;8397/+ (F)	24.3009	10.6667	127.331	5.33333	1.80908	239.333	642
;NP6293 G4/+; (F)	26.4848	9.66667	125.524	5	1.9017	240.667	580.667		;105071/+;8397/+ (F)	19.2381	13	107.483	6.66667	1.96326	192	609.667		;105071/NP6293 G4;8397/+ (F)	19.2986	13.6667	135.259	6	1.79811	246	654
;NP6293 G4/+; (F)	12.0451	17	118.333	6	2.03807	203	549.667		;105071/+;8397/+ (F)	24.8598	7.33333	208.45	3.66667	1.98415	172.333	653		;105071/NP6293 G4;8397/+ (F)	20.4057	18.3333	186.242	5	1.70789	357.667	658.333
;NP6293 G4/+; (F)	18.5035	17.6667	198.667	3.33333	1.93141	325	650.667		;105071/+;8397/+ (F)	28.0513	10.6667	51.3571	11	1.36565	291.333	506		;105071/NP6293 G4;8397/+ (F)	19.1322	16.6667	50.6002	14.3333	1.64671	303	584
;NP6293 G4/+; (F)	17.5364	17	547.222	1.66667	1.47384	297.667	697.667		;105071/+;8397/+ (F)	14.5583	5.66667	34.9074	16	1.49923	70.3333	552.667		;105071/NP6293 G4;8397/+ (F)	8.78788	21.3333	128.111	7.33333	1.90411	189	646.333
;NP6293 G4/+; (F)	14.756	14	77.7121	7.66667	2.11121	203.333	510.667		;105071/+;8397/+ (F)	31.5211	9.33333	142.202	7.33333	2.00972	266.333	593		;105071/NP6293 G4;8397/+ (F)	25.2573	14	319.8	3.66667	1.42553	340	665.667
;NP6293 G4/+; (F)	13.2	20	127.4	5	1.92751	264	637		;105071/+;8397/+ (F)	20.4167	12	227	3	1.71735	245	681		;105071/NP6293 G4;8397/+ (F)	12.5789	19	108.667	6	2.66241	239	652
;NP6293 G4/+; (F)	10.0417	24	82.8571	7	1.7411	241	580		;105071/+;8397/+ (F)	14.7778	18	152.5	4	1.57371	266	610		;105071/NP6293 G4;8397/+ (F)	15.125	16	342	2	1.74074	242	684
;NP6293 G4/+; (F)	16.0526	19	110.8	5	1.88448	305	554		;105071/+;8397/+ (F)	10.6316	19	91.1667	6	1.7029	202	547		;105071/NP6293 G4;8397/+ (F)	16.8889	18	216	3	1.5462	304	648
;NP6293 G4/+; (F)	19.3077	13	223.667	3	1.39652	251	671		;105071/+;8397/+ (F)	11.1053	19	158	4	1.63255	211	632		;105071/NP6293 G4;8397/+ (F)	13	17	114	5	1.44753	221	570
;NP6293 G4/+; (F)	39.8333	12	83.1429	7	2.56464	478	582		;105071/+;8397/+ (F)	8.88235	17	213.333	3	1.34877	151	640		;105071/NP6293 G4;8397/+ (F)	27.1538	13	704	1	1.4712	353	704
;NP6293 G4/+; (F)	3.72222	18	40.5714	14	1.40423	67	568		;105071/+;8397/+ (F)	27.9231	13	105.5	6	1.76072	363	633		;105071/NP6293 G4;8397/+ (F)	23.25	12	644	1	1.3624	279	644
;NP6293 G4/+; (F)	12.3125	16	46.4	10	2.38689	197	464		;105071/+;8397/+ (F)	8.07692	13	165	4	1.75371	105	660		;105071/NP6293 G4;8397/+ (F)	15.7727	22	340.5	2	1.3747	347	681
;NP6293 G4/+; (F)	15.5	18	30.375	16	1.61276	279	486		;105071/+;8397/+ (F)	15.7273	11	44	13	2.22478	173	572		;105071/NP6293 G4;8397/+ (F)	7.5	34	103.5	6	1.25933	255	621
;NP6293 G4/+; (F)	13.1176	17	62.7778	9	2.553	223	565		;105071/+;8397/+ (F)	20.8	15	95.8333	6	1.85145	312	575		;105071/NP6293 G4;8397/+ (F)	29.5385	13	218.667	3	1.48872	384	656
;NP6293 G4/+; (F)	13.8889	27	58.8	10	1.78782	375	588		;105071/+;8397/+ (F)	9.16129	31	93	7	1.06349	284	651		;105071/NP6293 G4;8397/+ (F)	9.42308	26	331.5	2	1.54802	245	663
;NP6293 G4/+; (F)	13.2632	19	67.4444	9	1.71034	252	607		;105071/+;8397/+ (F)	7.88889	18	92	6	1.89664	142	552		;105071/NP6293 G4;8397/+ (F)	14.9231	13	215.667	3	1.49666	194	647
;NP6293 G4/+; (F)	6.94444	18	75.125	8	1.37307	125	601		;105071/+;8397/+ (F)	22.5882	17	80.875	8	1.12745	384	647		;105071/NP6293 G4;8397/+ (F)	10.5	20	212.667	3	1.48223	210	638
;NP6293 G4/+; (F)	18.2632	19	105.333	6	1.47826	347	632		;105071/+;8397/+ (F)	22.5556	18	164.75	4	1.87701	406	659		;105071/NP6293 G4;8397/+ (F)	8.33333	15	216.333	3	2.0406	125	649
;NP6293 G4/+; (F)	12.2857	21	41.5714	14	1.2788	258	582		;105071/+;8397/+ (F)	4.71429	7	72.375	8	1.92382	33	579		;105071/NP6293 G4;8397/+ (F)	7.14286	14	156.5	4	2.36606	100	626
;NP6293 G4/+; (F)	12.6522	23	54	11	1.50181	291	594		;105071/+;8397/+ (F)	14	20	44.6667	12	2.04815	280	536		;105071/NP6293 G4;8397/+ (F)	10.28	25	340	2	1.35458	257	680
;NP6293 G4/+; (F)	11.0476	21	693	1	1.2607	232	693		;105071/+;8397/+ (F)	16.5625	16	201.333	3	1.87544	265	604		;105071/NP6293 G4;8397/+ (F)	6.36667	30	212	3	1.62092	191	636
