# Supplementary material for: Modulation of sleep by trafficking of lipids through the Drosophila blood-brain barrier
Source: eLife. 2023 May 4;12:e86336. doi: 10.7554/eLife.86336 (PMC10205086; doi:10.7554/eLife.86336)
Supplement: Figure 3—figure supplement 2—source data 1. [file elife-86336-fig3-figsupp2-data1.xlsx]

## Sheet: Sheet1
PG+SPG>Mgl/Lrp1 RNAi at 31 degree
GAL80 ts Control	rD aLSE	rD aNSE	rN aLSE	rN aNSE	AI	rDS	rNS		UAS Control	rD aLSE	rD aNSE	rN aLSE	rN aNSE	AI	rDS	rNS		GAL80 ts x UAS	rD aLSE	rD aNSE	rN aLSE	rN aNSE	AI	rDS	rNS
;9-137 G4/+;tub80.ts/+ (F)	27.3889	14.5	69.2381	10	1.59588	353	566		;105071/+; 8397/+ (F)	22.7738	15	49.7188	12	2.4541	337	494.5		;105071/9-137 G4;8397/tub80.ts(F)	39.9917	14.5	25.0881	19	1.25054	457	449
;9-137 G4/+;tub80.ts/+ (F)	25.5349	16.5	24.1264	20	1.23973	418	410		;105071/+; 8397/+ (F)	24.8523	17	26.3667	14.5	1.72565	348	381.5		;105071/9-137 G4;8397/tub80.ts(F)	36.9398	17.5	67.0938	11	1.36249	377.5	551
;9-137 G4/+;tub80.ts/+ (F)	12.4632	22.5	64.1667	13.5	1.07855	282	540		;105071/+; 8397/+ (F)	13.0901	22.5	17.25	15.5	1.70094	275.5	283		;105071/9-137 G4;8397/tub80.ts(F)	49.3731	11.5	88.2	8	1.81265	559.5	585
;9-137 G4/+;tub80.ts/+ (F)	37.9314	13	32.3626	17	1.50712	411.5	511		;105071/+; 8397/+ (F)	26.9345	18	54.125	9	1.75782	373	389		;105071/9-137 G4;8397/tub80.ts(F)	43.4511	15.5	120.618	10	1.12861	457.5	580.5
;9-137 G4/+;tub80.ts/+ (F)	15.3939	18.5	17.5434	19.5	1.20092	274.5	344		;105071/+; 8397/+ (F)	17.7763	22.5	61.6875	10	1.68877	357	587		;105071/9-137 G4;8397/tub80.ts(F)	58.0864	13.5	34.9583	16.5	1.56417	399	514
;9-137 G4/+;tub80.ts/+ (F)	29.8299	12.5	17.6773	21	1.6015	315.5	365		;105071/+; 8397/+ (F)	19.0139	21	38.3631	13	1.2079	379	489.5		;105071/9-137 G4;8397/tub80.ts(F)	26.7262	19	23.8207	19.5	1.05715	435	438.5
;9-137 G4/+;tub80.ts/+ (F)	12.895	19	17.5177	25.5	1.05523	255.5	405		;105071/+; 8397/+ (F)									;105071/9-137 G4;8397/tub80.ts(F)	98.3125	6	35.1212	16	1.48866	514	468
;9-137 G4/+;tub80.ts/+ (F)	32.78	16.5	54.2619	14	1.61766	377.5	517.5		;105071/+; 8397/+ (F)	19.6813	17	19.275	22	1.3001	285	405.5		;105071/9-137 G4;8397/tub80.ts(F)	86.4778	7	32.1437	16	1.73284	553.5	484.5
;9-137 G4/+;tub80.ts/+ (F)	31.8333	18	13.986	25	1.10129	375.5	351.5		;105071/+; 8397/+ (F)	50.6625	9	38.8274	13	1.51522	448.5	497.5		;105071/9-137 G4;8397/tub80.ts(F)	62.5625	8	79.2062	10.5	1.30499	500.5	560
;9-137 G4/+;tub80.ts/+ (F)	38.8045	13.5	46.0278	13	1.25025	333.5	463.5		;105071/+; 8397/+ (F)	30.725	17.5	185.417	3.5	1.04521	517	632.5		;105071/9-137 G4;8397/tub80.ts(F)	31.8714	15.5	29.8645	18	1.0825	407.5	456.5
;9-137 G4/+;tub80.ts/+ (F)	26.7	15	12.8534	26.5	0.868599	312	346.5		;105071/+; 8397/+ (F)	8.93889	24	16.7105	19	1.81054	222.5	317.5		;105071/9-137 G4;8397/tub80.ts(F)	84.7667	7	30.7045	16.5	1.33748	542.5	403
;9-137 G4/+;tub80.ts/+ (F)	28.4762	13	7.03581	28.5	1.08738	357	205.5		;105071/+; 8397/+ (F)	34.8	18.5	117.562	6	1.32997	433	616		;105071/9-137 G4;8397/tub80.ts(F)	35.7119	14.5	21.2759	22	1.00886	518.5	435
;9-137 G4/+;tub80.ts/+ (F)	28.5321	12.5	53.9333	11	1.97874	353	469		;105071/+; 8397/+ (F)	43.9021	12	46.6909	13	1.24583	523	590		;105071/9-137 G4;8397/tub80.ts(F)	59.9365	8	38.8678	14.5	1.43275	478	556
;9-137 G4/+;tub80.ts/+ (F)	26.3868	15.5	17.9947	19.5	1.67604	384	354		;105071/+; 8397/+ (F)	26.1	20	199.9	6	1.29514	332	643		;105071/9-137 G4;8397/tub80.ts(F)	45.35	10	56.3056	10.5	1.77273	453.5	575.5
;9-137 G4/+;tub80.ts/+ (F)	97.7	5	51.9125	9	2.36085	488.5	450		;105071/+; 8397/+ (F)	38.1364	10	37.13	17.5	1.86331	371.5	480.5		;105071/9-137 G4;8397/tub80.ts(F)	48.5	10.5	30.4672	20	1.4175	450.5	499
;9-137 G4/+;tub80.ts/+ (F)	30.5383	15	54.6767	13	1.22529	395.5	510		;105071/+; 8397/+ (F)	40.1389	13.5	63.6333	9.5	1.09825	472	600		;105071/9-137 G4;8397/tub80.ts(F)	84.9062	10	29.5292	15.5	1.47702	520	455
;9-137 G4/+;tub80.ts/+ (F)	26.5606	17.5	25.4391	17.5	1.25708	400.5	446.5		;105071/+; 8397/+ (F)	40.4293	15.5	42.206	13.5	1.30142	511	568.5		;105071/9-137 G4;8397/tub80.ts(F)	73.55	13.5	43.3111	14	1.08433	559	546
;9-137 G4/+;tub80.ts/+ (F)	56.6	10.5	47.6856	11.5	1.28623	463.5	546.5		;105071/+; 8397/+ (F)	62.0625	9	120.738	8.5	1.84649	546	544.5		;105071/9-137 G4;8397/tub80.ts(F)	48.8182	11	718		1.42857	537	719
;9-137 G4/+;tub80.ts/+ (F)	36.0556	16.5	48.9615	10.5	2.06473	452	489		;105071/+; 8397/+ (F)	24.6397	20.5	21.2723	22	1.05536	484.5	417.5		;105071/9-137 G4;8397/tub80.ts(F)	47.7576	10	37.6178	14.5	1.6704	474	539
;9-137 G4/+;tub80.ts/+ (F)	17.0086	20.5	33.0947	17	0.989735	320.5	478.5		;105071/+; 8397/+ (F)	34.6872	14	74.6825	8	1.59037	449.5	583		;105071/9-137 G4;8397/tub80.ts(F)	57.4333	9.5	43.4176	13.5	1.23191	544	559
;9-137 G4/+;tub80.ts/+ (F)	49.6042	10	11.0636	26.5	1.11261	473	295.5		;105071/+; 8397/+ (F)	19.8529	17	36.4697	13	1.62981	337.5	450.5		;105071/9-137 G4;8397/tub80.ts(F)	80.2292	7	356.929	7.5	1.53355	549.5	577
;9-137 G4/+;tub80.ts/+ (F)	30.3667	12.5	29.5381	14.5	1.56274	378.5	428.5		;105071/+; 8397/+ (F)	18.3237	20.5	50.95	10.5	1.18314	364.5	530.5		;105071/9-137 G4;8397/tub80.ts(F)	43.5778	12	54.8231	11.5	1.30862	484	618.5
;9-137 G4/+;tub80.ts/+ (F)	66.5972	11	39.3706	13.5	1.75588	350	477.5		;105071/+; 8397/+ (F)	28.7833	17	171.053	10.5	1.32651	390.5	555.5		;105071/9-137 G4;8397/tub80.ts(F)	88.8833	9.5	96.3056	11	1.33282	544	578.5
;9-137 G4/+;tub80.ts/+ (F)	15.9808	15.5	3.63462	19	1.21538	256.5	80.5		;105071/+; 8397/+ (F)	68.6412	11	62.5511	9.5	1.3189	498.5	572		;105071/9-137 G4;8397/tub80.ts(F)	47.75	10.5	43.6286	15.5	0.964719	495	562
;9-137 G4/+;tub80.ts/+ (F)	31.8438	12	9.27917	27	0.963005	369.5	252.5		;105071/+; 8397/+ (F)	22.6026	14	16.6964	22.5	1.43706	313.5	378.5		;105071/9-137 G4;8397/tub80.ts(F)	54.0084	12	59.9286	10	1.06747	516	451
;9-137 G4/+;tub80.ts/+ (F)	22.7574	18.5	31.8658	16.5	1.23157	401.5	527		;105071/+; 8397/+ (F)	69.0833	8.5	76.9848	8.5	1.92363	489.5	583.5		;105071/9-137 G4;8397/tub80.ts(F)	27.2262	16.5	33.6905	17.5	1.27967	397	556
;9-137 G4/+;tub80.ts/+ (F)	125.5	4.5	25.7583	15.5	1.89365	481.5	400.5		;105071/+; 8397/+ (F)	97.1591	12.5	204.536	4.5	1.69872	475	615.5		;105071/9-137 G4;8397/tub80.ts(F)	35.1761	15	15.5532	26.5	1.09072	367	402.5
;9-137 G4/+;tub80.ts/+ (F)	34.359	12.5	44.65	12.5	1.51458	430.5	525		;105071/+; 8397/+ (F)	15.1894	26	26.6381	14.5	1.64657	371.5	383		;105071/9-137 G4;8397/tub80.ts(F)	56.3788	10	18.6501	23	1.09325	557.5	406.5
;9-137 G4/+;tub80.ts/+ (F)	38.9692	11.5	106.35	7	1.00411	443	582		;105071/+; 8397/+ (F)	38.309	12.5	22.78	22.5	1.20431	429	502		;105071/9-137 G4;8397/tub80.ts(F)	20.2977	17.5	18.8043	20.5	1.40655	349	387.5
;9-137 G4/+;tub80.ts/+ (F)	16.7045	20	32.5261	13	1.55298	335.5	408.5		;105071/+; 8397/+ (F)	12.9286	23	66.0083	13	1.51283	295.5	584		;105071/9-137 G4;8397/tub80.ts(F)	41.2484	13	16.0862	25	1.04966	471	399
;9-137 G4/+;tub80.ts/+ (F)	32.261	13.5	12.9808	20	1.02538	436.5	280.5		;105071/+; 8397/+ (F)	18.4403	19	45.9554	14.5	1.81747	335	480		;105071/9-137 G4;8397/tub80.ts(F)	80.6458	7	22.6113	20	1.02665	549.5	432
;9-137 G4/+;tub80.ts/+ (F)	42.2	11	352.308	7	2.17915	454.5	632		;105071/+; 8397/+ (F)	28.2466	19.5	26.5556	16	1.43413	366	426		;105071/9-137 G4;8397/tub80.ts(F)	75.5357	7.5	27.737	18	1.24163	564	456.5
;9-137 G4/+;tub80.ts/+ (F)	42.5357	10.5	34.6042	14	1.33226	396.5	477.5		;105071/+; 8397/+ (F)	28	13.5	35.275	15.5	1.02952	367.5	485		;105071/9-137 G4;8397/tub80.ts(F)	34.3923	15	33.5788	16.5	1.29351	460	523.5
;9-137 G4/+;tub80.ts/+ (F)	17.0554	24	7.408	29	1.10923	392.5	219.5		;105071/+; 8397/+ (F)	32.7375	13	18.3676	19.5	1.83563	394.5	363.5		;105071/9-137 G4;8397/tub80.ts(F)	59.2675	12.5	23.7784	23.5	0.832994	494.5	487
;9-137 G4/+;tub80.ts/+ (F)	23.3512	18.5	12.0154	24	1.29821	411	289.5		;105071/+; 8397/+ (F)	20.1692	19	68.5625	8.5	1.18945	357	578.5		;105071/9-137 G4;8397/tub80.ts(F)	56.0354	10	54.4931	13	0.967084	549.5	581.5
;9-137 G4/+;tub80.ts/+ (F)	35.9484	11.5	11.4877	28.5	0.965426	363	328		;105071/+; 8397/+ (F)	81.0707	13.5	79.7589	7.5	1.43812	508.5	592.5		;105071/9-137 G4;8397/tub80.ts(F)	49.0983	11	27.0647	18.5	1.05351	520.5	492.5
;9-137 G4/+;tub80.ts/+ (F)	42.5247	16.5	12.0741	25.5	1.00785	480	313		;105071/+; 8397/+ (F)	27.7444	16.5	40.3788	13	1.87287	451	507.5		;105071/9-137 G4;8397/tub80.ts(F)	28.5556	12	16.8864	27	0.859698	340	428
;9-137 G4/+;tub80.ts/+ (F)	19.1939	22	18.3663	22	1.44744	410	402		;105071/+; 8397/+ (F)	11.5214	28	37.5792	15.5	1.04063	290	581.5		;105071/9-137 G4;8397/tub80.ts(F)	64.1188	10.5	51.2928	13.5	1.32069	460.5	549
;9-137 G4/+;tub80.ts/+ (F)	56.6364	9.5	11.0812	15.5	1.68943	513.5	163.5		;105071/+; 8397/+ (F)	10.0893	24	15.3069	20.5	1.52986	235.5	287		;105071/9-137 G4;8397/tub80.ts(F)	9.0668	27.5	24.355	23	0.769473	247.5	491
;9-137 G4/+;tub80.ts/+ (F)	53.85	9.5	22.4737	19	1.11869	507.5	427		;105071/+; 8397/+ (F)	21.8871	19.5	46	13.5	1.29185	364.5	518.5		;105071/9-137 G4;8397/tub80.ts(F)	56.4875	9	45.2569	16.5	1.48729	498.5	552
;9-137 G4/+;tub80.ts/+ (F)	26.7083	18	13.2386	25	1.23905	427.5	335.5		;105071/+; 8397/+ (F)	13.6667	21	40.8333	12	1.60574	287	490		;105071/9-137 G4;8397/tub80.ts(F)	67.3571	6.5	16.8011	28	0.98988	438	439
;9-137 G4/+;tub80.ts/+ (F)	21.6529	18.5	12.7989	23.5	1.10237	388.5	301		;105071/+; 8397/+ (F)	15.8854	21.5	25.9103	20.5	1.12728	327.5	525.5		;105071/9-137 G4;8397/tub80.ts(F)	34.8994	12.5	30.271	17.5	1.41457	423	478
;9-137 G4/+;tub80.ts/+ (F)	29.5893	16.5	134.628	8	1.16565	472.5	643.5		;105071/+; 8397/+ (F)	9.14788	27.5	27.2409	18.5	1.32841	251.5	470.5		;105071/9-137 G4;8397/tub80.ts(F)	31.7023	15.5	18.0752	27	1.02504	434	488.5
;9-137 G4/+;tub80.ts/+ (F)	27.5812	19.5	7.838	36	1.01596	406	283.5		;105071/+; 8397/+ (F)	63.2591	13.5	123.859	8	1.52028	438	528.5		;105071/9-137 G4;8397/tub80.ts(F)	101.2	9	21.1542	22	1.08761	524	463.5
;9-137 G4/+;tub80.ts/+ (F)	21.5857	14.5	28.2068	16.5	1.30031	308	442		;105071/+; 8397/+ (F)	19.6006	20.5	24.5571	25	1.11973	278	477.5		;105071/9-137 G4;8397/tub80.ts(F)	35.6885	11.5	31.1076	17	1.14405	394.5	527
;9-137 G4/+;tub80.ts/+ (F)	38.9861	10.5	28.6719	15	1.15064	391	430.5		;105071/+; 8397/+ (F)	38.7417	11	28.3429	17	1.55917	413.5	450.5		;105071/9-137 G4;8397/tub80.ts(F)	25.4944	16.5	11.0258	26.5	1.27367	410.5	273.5
;9-137 G4/+;tub80.ts/+ (F)	14.3714	23	15.722	29.5	0.903705	321	376.5		;105071/+; 8397/+ (F)	66.5929	8.5	135.643	5	1.23194	542.5	561.5		;105071/9-137 G4;8397/tub80.ts(F)	44.5159	11.5	24.1838	20.5	1.13431	478.5	468
;9-137 G4/+;tub80.ts/+ (F)	26.0312	12	7.42962	31	1.22321	290.5	234.5											;105071/9-137 G4;8397/tub80.ts(F)	23.7273	13.5	14.3957	28	1.43409	301	388
PG+SPG>Mgl/Lrp1 RNAi at 18 degree
GAL80 ts Control	rD aLSE	rD aNSE	rN aLSE	rN aNSE	AI	rDS	rNS		UAS Control	rD aLSE	rD aNSE	rN aLSE	rN aNSE	AI	rDS	rNS		GAL80 ts x UAS	rD aLSE	rD aNSE	rN aLSE	rN aNSE	AI	rDS	rNS
;9-137 G4/+;tub80.ts/+ (F)	42.2667	4.33333	57.9803	12	1.67011	183.333	534		;105071/+; 8397/+ (F)	20.9769	12	153.472	4.33333	1.50537	248	614		;105071/9-137 G4;8397/tub80.ts(F)	16.3317	13.6667	31.9801	18.6667	1.05362	221.667	481.333
;9-137 G4/+;tub80.ts/+ (F)	45.6032	9	88.4056	10.3333	1.36769	279	618		;105071/+; 8397/+ (F)	9.72963	17	189.424	5.33333	1.27194	163.333	588		;105071/9-137 G4;8397/tub80.ts(F)	23.4511	11.6667	41.3278	15.3333	1.34549	263.333	535.333
;9-137 G4/+;tub80.ts/+ (F)	36.4797	9.33333	38.7767	15.6667	1.24378	325.333	587		;105071/+; 8397/+ (F)	20.0276	12.6667	145.099	7	1.23228	240.333	578.333		;105071/9-137 G4;8397/tub80.ts(F)	49.9444	8	77.0707	11.3333	1.30634	362	577.333
;9-137 G4/+;tub80.ts/+ (F)	30.5076	9	62.9798	9.66667	1.57629	265.333	602.333		;105071/+; 8397/+ (F)	25.6944	12	113.733	5	1.2737	264	568.667		;105071/9-137 G4;8397/tub80.ts(F)	30.9488	8.33333	304.208	4	1.09444	253.333	584.333
;9-137 G4/+;tub80.ts/+ (F)	14.1827	17	79.1524	9.66667	1.22035	238.667	627.333		;105071/+; 8397/+ (F)	54.1762	7	299.156	4	1.70717	323.333	627.667		;105071/9-137 G4;8397/tub80.ts(F)	12.3152	10.6667	57.1359	12	1.25793	131	549
;9-137 G4/+;tub80.ts/+ (F)	25.8571	7.33333	56.8847	10.6667	1.29329	189.333	594.667		;105071/+; 8397/+ (F)	32.0929	11.3333	319.333	2	1.06288	344	638.667		;105071/9-137 G4;8397/tub80.ts(F)	28.8254	5	26.4343	19.6667	1.05956	124	483.667
;9-137 G4/+;tub80.ts/+ (F)	5.21061	22.3333	38.0809	20.3333	1.15575	116	520		;105071/+; 8397/+ (F)	9.50316	14	35.5366	14.6667	1.12585	139.333	517		;105071/9-137 G4;8397/tub80.ts(F)	41.4108	8.33333	257.534	8.66667	0.985501	308.333	592.333
;9-137 G4/+;tub80.ts/+ (F)	18.7347	12.6667	90.0823	7.66667	1.29946	226.667	616.333		;105071/+; 8397/+ (F)	22.8173	11	47.3067	13.3333	1.35723	236	546		;105071/9-137 G4;8397/tub80.ts(F)	43.8741	8.33333	111.13	9	1.18382	345	587.667
;9-137 G4/+;tub80.ts/+ (F)	14.6994	15.3333	55.7024	12.6667	1.19749	224.333	554.667		;105071/+; 8397/+ (F)	37.5357	10.6667	88.1317	8.33333	0.888494	378	592		;105071/9-137 G4;8397/tub80.ts(F)	13.8159	14.3333	132	5	1.17953	197.667	594.667
;9-137 G4/+;tub80.ts/+ (F)	16.0559	11	43.6027	14.3333	1.09617	165.333	586.333		;105071/+; 8397/+ (F)	17.03	11	182.306	3.33333	1.38348	182.333	595.667		;105071/9-137 G4;8397/tub80.ts(F)	5.33333	5.66667	44.0333	12	0.965861	30	523.333
;9-137 G4/+;tub80.ts/+ (F)	8.13158	17.3333	29.9564	17	1.19576	135.667	493		;105071/+; 8397/+ (F)	43.1058	8.33333	97.8889	6.33333	1.08374	354.333	617		;105071/9-137 G4;8397/tub80.ts(F)	21.5048	14.6667	131.6	9.33333	1.11586	315	530
;9-137 G4/+;tub80.ts/+ (F)	6.83333	10.6667	26.5	17.6667	1.19081	81.3333	455		;105071/+; 8397/+ (F)	66.4833	7	120.222	5.33333	0.990582	437.667	615.667		;105071/9-137 G4;8397/tub80.ts(F)	24.3397	14	36.9478	15.6667	1.12027	335.667	540.333
;9-137 G4/+;tub80.ts/+ (F)	8.83757	11	100.852	7.33333	1.72998	96	613.333		;105071/+; 8397/+ (F)	24.8694	10	163.989	6	1.23551	246	623		;105071/9-137 G4;8397/tub80.ts(F)	27.525	10.3333	202.556	3.33333	0.944208	270.333	662.333
;9-137 G4/+;tub80.ts/+ (F)	10.873	14	47.0449	12.3333	1.68683	150.667	518		;105071/+; 8397/+ (F)	26.3264	11.3333	129.917	5.66667	1.30728	226.667	605.333		;105071/9-137 G4;8397/tub80.ts(F)	11.7122	17	85.1852	7.66667	1.10847	201	633
;9-137 G4/+;tub80.ts/+ (F)	17.3095	6.33333	73.0143	8.33333	1.51057	106.667	595		;105071/+; 8397/+ (F)	24.0392	17.6667	389.944	3	0.805943	428	684.667		;105071/9-137 G4;8397/tub80.ts(F)	15.0929	16.6667	60.1181	11.3333	1.07674	248	566.667
;9-137 G4/+;tub80.ts/+ (F)	33.3752	10	76.9731	8.66667	1.42193	261	621.333		;105071/+; 8397/+ (F)	57.3631	8.66667	457.5	1.66667	1.00667	348.667	683.333		;105071/9-137 G4;8397/tub80.ts(F)	32.6148	9.66667	78.3593	10.3333	1.07475	315.667	589.333
;9-137 G4/+;tub80.ts/+ (F)	20.6963	6.66667	102.544	7	1.6423	124.333	654		;105071/+; 8397/+ (F)	48.1705	9	285.676	6	1.20815	428	666.333		;105071/9-137 G4;8397/tub80.ts(F)	32.2746	16.6667	313.375	4.33333	1.15381	402	658.667
;9-137 G4/+;tub80.ts/+ (F)	36.8598	10.3333	323.786	4	1.81847	299.667	681		;105071/+; 8397/+ (F)	56.6944	9	216.153	4.33333	1.29663	382.333	661		;105071/9-137 G4;8397/tub80.ts(F)	49.7019	8.33333	117.952	7.33333	0.995676	317.667	606.333
;9-137 G4/+;tub80.ts/+ (F)	28.7407	7.66667	86.9491	7.66667	1.61434	207.333	646.667		;105071/+; 8397/+ (F)	49.131	9.33333	126.124	5.33333	1.02586	335	638.333		;105071/9-137 G4;8397/tub80.ts(F)	32.3848	10	109.117	8.33333	1.09057	323	611
;9-137 G4/+;tub80.ts/+ (F)	6.85714	5.66667	122.472	7.66667	1.59222	34.6667	666.333		;105071/+; 8397/+ (F)	49.7518	8	93.8526	9.66667	1.40707	373.333	600.667		;105071/9-137 G4;8397/tub80.ts(F)	62.1816	9.66667	79.6124	8	0.949612	445.667	632.667
;9-137 G4/+;tub80.ts/+ (F)	28.45	3	171.328	4	1.44855	82.3333	659		;105071/+; 8397/+ (F)	22.1259	13	118.569	6.66667	1.05104	270.333	611		;105071/9-137 G4;8397/tub80.ts(F)	97.2963	5.33333	139.302	5.33333	0.957084	417.333	646
;9-137 G4/+;tub80.ts/+ (F)	59.1944	4.33333	93.4872	7.66667	1.96012	228.667	583.333		;105071/+; 8397/+ (F)	19.4992	16.3333	143.456	9	1.12435	318.333	600		;105071/9-137 G4;8397/tub80.ts(F)	38.8571	9.33333	76.2608	8.66667	1.1057	347.667	634
;9-137 G4/+;tub80.ts/+ (F)	16.3935	11.6667	109.83	8	1.34676	191	604.667		;105071/+; 8397/+ (F)	28.0032	10.3333	279.905	6	1.04429	261.667	643.333		;105071/9-137 G4;8397/tub80.ts(F)	61.0417	6.33333	53.8439	13	1.04045	344.333	581.333
;9-137 G4/+;tub80.ts/+ (F)	4.16667	4.66667	241.722	2.66667	1.43913	17.6667	613.333		;105071/+; 8397/+ (F)	25.2148	10	373.944	3	1.35099	251.333	665.667		;105071/9-137 G4;8397/tub80.ts(F)	30.4071	9.66667	303.081	5	1.00609	271.333	670.667
;9-137 G4/+;tub80.ts/+ (F)	3.75	2	84.2197	10.3333	1.32725	10	610.333		;105071/+; 8397/+ (F)	23.1687	11.3333	56.4258	9.66667	1.09785	252.333	534.333		;105071/9-137 G4;8397/tub80.ts(F)	46.6667	7.66667	492.167	2	1.00043	325	645.667
;9-137 G4/+;tub80.ts/+ (F)	17.1606	10.3333	177.8	5.33333	1.3541	176	617		;105071/+; 8397/+ (F)	40.026	8.33333	125.576	5.33333	1.82681	315.333	631		;105071/9-137 G4;8397/tub80.ts(F)	28.4697	9.66667	258.398	9	1.05166	235	612.333
;9-137 G4/+;tub80.ts/+ (F)	20.5722	5	280.167	2.66667	1.4344	99	671		;105071/+; 8397/+ (F)	79.9127	6	81.9841	8.66667	1.28219	386	630		;105071/9-137 G4;8397/tub80.ts(F)	7.18969	18	140.889	5.66667	0.933911	128.667	644.667
;9-137 G4/+;tub80.ts/+ (F)	19.6004	12.6667	192.25	5.33333	1.56437	248.667	664.667		;105071/+; 8397/+ (F)	17.5392	16.3333	482.19	3	1.01166	281.333	651.333		;105071/9-137 G4;8397/tub80.ts(F)	20.7864	17.6667	41.4689	14.3333	0.951938	328.333	588
;9-137 G4/+;tub80.ts/+ (F)	13.9949	14.6667	583.167	1.33333	1.01836	205.333	699.333		;105071/+; 8397/+ (F)	34.1082	8.33333	83.6786	7.66667	1.34337	268.333	638.667		;105071/9-137 G4;8397/tub80.ts(F)	11.0246	11	133.297	6.66667	1.20372	124	590.333
;9-137 G4/+;tub80.ts/+ (F)	9.02991	8	143	4.66667	1.59045	73.6667	643.667		;105071/+; 8397/+ (F)	61.9954	7	94.5262	6.66667	1.72986	375	603.333		;105071/9-137 G4;8397/tub80.ts(F)	48.7937	11.6667	93.0611	7.33333	1.18712	401	635.333
;9-137 G4/+;tub80.ts/+ (F)	8.70238	5	31.1019	15.3333	1.68729	37.6667	464.333		;105071/+; 8397/+ (F)	22.2042	11.3333	44.8907	13.6667	1.60617	234.333	598		;105071/9-137 G4;8397/tub80.ts(F)	23.8947	15.3333	309.59	4.33333	0.857962	321.333	673.667
;9-137 G4/+;tub80.ts/+ (F)	73.2444	7.33333	73.6591	9.66667	2.22698	211	641		;105071/+; 8397/+ (F)	12.6769	8.66667	45.7366	12	1.09805	99.6667	545.333		;105071/9-137 G4;8397/tub80.ts(F)	42.2857	7.66667	197.3	5	1.19802	322.667	626.333
;9-137 G4/+;tub80.ts/+ (F)	45.2976	5	282.75	2.66667	1.79973	218.333	676.333		;105071/+; 8397/+ (F)	15.5473	14.6667	167.111	3.66667	0.862563	226.667	598		;105071/9-137 G4;8397/tub80.ts(F)	17.5972	9	73.2857	9.66667	1.04219	156.333	623
;9-137 G4/+;tub80.ts/+ (F)	9.82222	12	54.2609	10.6667	1.06712	116.667	568.667		;105071/+; 8397/+ (F)	10.7724	10.3333	44.3565	12.6667	1.2605	109	500.333		;105071/9-137 G4;8397/tub80.ts(F)	5.6796	17	59.2864	14.3333	0.780726	97	605.333
;9-137 G4/+;tub80.ts/+ (F)	51.1984	5.33333	276.016	7	1.42334	231.667	627.667		;105071/+; 8397/+ (F)	12.3193	14.3333	105.772	6.33333	1.03619	164.333	643		;105071/9-137 G4;8397/tub80.ts(F)	13.5125	13	146.028	4.66667	0.820312	177	655.333
;9-137 G4/+;tub80.ts/+ (F)	3.4	5.66667	123.744	5	1.01514	15.6667	600		;105071/+; 8397/+ (F)	38.177	8	79.5333	9	1.05364	243.667	575.667		;105071/9-137 G4;8397/tub80.ts(F)	12.709	16	40.5623	14.6667	1.00055	200.333	566
;9-137 G4/+;tub80.ts/+ (F)	12.65	9.66667	103.139	7.33333	0.918812	124	603.333		;105071/+; 8397/+ (F)	24.7111	8	123.472	7	1.3545	180	595		;105071/9-137 G4;8397/tub80.ts(F)	10.2245	15.6667	116.897	7.33333	0.875409	152.667	605.667
;9-137 G4/+;tub80.ts/+ (F)	8.91005	9.66667	78.3787	10.3333	1.16219	86.3333	601.333		;105071/+; 8397/+ (F)	18.6597	15	60.918	12.6667	0.973053	277	599		;105071/9-137 G4;8397/tub80.ts(F)	23.8148	10	126.278	6.33333	1.18717	234.333	620.333
;9-137 G4/+;tub80.ts/+ (F)	24.5111	11.6667	121.15	6.33333	1.14859	283	655		;105071/+; 8397/+ (F)	8.25397	4.33333	15.0328	24.6667	1.48142	37.3333	360		;105071/9-137 G4;8397/tub80.ts(F)	3.38745	21.3333	86.9722	7.66667	1.01091	72.3333	643.333
;9-137 G4/+;tub80.ts/+ (F)	13.875	8	79.9639	8.33333	1.05571	119.333	581.667		;105071/+; 8397/+ (F)	30.977	9.66667	65.875	10	1.0999	269.333	579.667		;105071/9-137 G4;8397/tub80.ts(F)	19.795	9.33333	73.8056	9	1.33117	164.667	602.667
;9-137 G4/+;tub80.ts/+ (F)	6.57479	12.6667	46.4563	12.6667	1.20007	83	585		;105071/+; 8397/+ (F)	18.0171	14.3333	112.965	6	0.951302	267	596.333		;105071/9-137 G4;8397/tub80.ts(F)	15.463	11.3333	82.1808	8.66667	0.937374	169.667	607.333
;9-137 G4/+;tub80.ts/+ (F)	23.4306	6.66667	28.3293	20.6667	1.12726	151.333	485.333		;105071/+; 8397/+ (F)	8.44444	7.33333	52.6532	10.3333	1.02694	75	541.333		;105071/9-137 G4;8397/tub80.ts(F)	3.91582	10.6667	266.006	8	1.02826	43	597.667
;9-137 G4/+;tub80.ts/+ (F)	17.6346	10.6667	35.1193	14.3333	1.29773	175.667	479.333		;105071/+; 8397/+ (F)	11.8615	16	64.3397	10	0.970555	184.333	561.333		;105071/9-137 G4;8397/tub80.ts(F)	9.07778	13.3333	19.8508	23	1.01085	114.333	436.333
;9-137 G4/+;tub80.ts/+ (F)	8.36111	12.3333	54.2152	11.6667	1.1531	106.667	586		;105071/+; 8397/+ (F)	22.5377	10	25.5982	18	1.20836	196.333	459.333		;105071/9-137 G4;8397/tub80.ts(F)	16.4236	12.6667	76.8387	9.33333	0.799046	195.667	553.667
;9-137 G4/+;tub80.ts/+ (F)	5.9127	5.33333	81.6333	8.33333	1.53375	29.6667	605.667		;105071/+; 8397/+ (F)	11.869	17.3333	39.9984	15.6667	0.99268	209.333	561.667		;105071/9-137 G4;8397/tub80.ts(F)	48.3333	5.33333	161.956	4.33333	1.11825	231.667	662
;9-137 G4/+;tub80.ts/+ (F)	2.72222	8.66667	88.7971	10	1.16685	24.3333	611		;105071/+; 8397/+ (F)	21.8287	8.33333	92.7444	6.66667	1.28204	183.333	583.333		;105071/9-137 G4;8397/tub80.ts(F)	5.92063	17	57.9815	11	1.05036	101.333	561.333
;9-137 G4/+;tub80.ts/+ (F)	7.31713	13	123.159	7.66667	0.934174	97.6667	614.333		;105071/+; 8397/+ (F)	34.073	14	420.889	2	0.788557	425.667	688		;105071/9-137 G4;8397/tub80.ts(F)	26.1111	8.33333	169.244	4	1.02357	211	647
;9-137 G4/+;tub80.ts/+ (F)	7.5	3.33333	34.3339	19.3333	1.28002	18	520.667											;105071/9-137 G4;8397/tub80.ts(F)	4.11429	17.3333	38.8333	15.3333	1.0221	71.6667	585.333
