# Supplementary material for: Modulation of sleep by trafficking of lipids through the Drosophila blood-brain barrier
Source: eLife. 2023 May 4;12:e86336. doi: 10.7554/eLife.86336 (PMC10205086; doi:10.7554/eLife.86336)
Supplement: Figure 3—figure supplement 3—source data 1. [file elife-86336-fig3-figsupp3-data1.xlsx]

## Sheet: Sheet1
PG+SPG>Mgl/Lrp1 RNAi at 31 degree
GAL80 ts Control	rD aLSE	rD aNSE	rN aLSE	rN aNSE	AI	rDS	rNS		UAS Control	rD aLSE	rD aNSE	rN aLSE	rN aNSE	AI	rDS	rNS		GAL80 ts x UAS	rD aLSE	rD aNSE	rN aLSE	rN aNSE	AI	rDS	rNS
;9-137 G4/+;tub80.ts/+ (F)	23.4412	19	22.2961	22	0.930249	428.5	488		;36389/+; 8397/+ (F)	24.054	13.5	64.8333	2.5	4.05292	296	142.5		;36389/9-137 G4;8397/tub80.ts(F)	16.8615	21.5	20.1779	20	1.28811	364	404
;9-137 G4/+;tub80.ts/+ (F)	10.0556	18	21.8611	14.5	1.92901	181	313		;36389/+; 8397/+ (F)	37.0105	14.5	20.25	14.5	1.93566	448.5	278.5		;36389/9-137 G4;8397/tub80.ts(F)	15.6662	20	9.61429	26.5	0.914562	282.5	260.5
;9-137 G4/+;tub80.ts/+ (F)	16.1793	14.5	29.4406	12	1.77021	240	357		;36389/+; 8397/+ (F)	155.329	10.5	22.375	8	2.27275	473.5	179.5		;36389/9-137 G4;8397/tub80.ts(F)	26.4519	19	27.5278	17.5	1.1712	399	482.5
;9-137 G4/+;tub80.ts/+ (F)	9.29545	16.5	10.7751	24	1.42972	160	266.5		;36389/+; 8397/+ (F)	14.4074	22.5	5.55	24	1.81658	327	143		;36389/9-137 G4;8397/tub80.ts(F)	22.4444	18	18.4	25	1	404	460
;9-137 G4/+;tub80.ts/+ (F)	21.2375	18	19.2875	18	1.34025	370	345		;36389/+; 8397/+ (F)	15.501	22	21.7026	13	1.46691	337	288.5		;36389/9-137 G4;8397/tub80.ts(F)	30.5143	12	22.9	16.5	1.47495	319	384.5
;9-137 G4/+;tub80.ts/+ (F)	11.4683	15	16.2631	17.5	1.57671	149.5	287.5		;36389/+; 8397/+ (F)	43.8357	12	23.1786	14	2.07433	494.5	325		;36389/9-137 G4;8397/tub80.ts(F)	11.6411	27.5	30.2273	19	0.954814	328.5	555.5
;9-137 G4/+;tub80.ts/+ (F)	15.1693	24	11.9524	19.5	1.66555	351	241		;36389/+; 8397/+ (F)	15.9318	20	37.5089	7.5	2.19077	310.5	281.5		;36389/9-137 G4;8397/tub80.ts(F)	10.8235	17	18.5104	14	1.14228	184	271.5
;9-137 G4/+;tub80.ts/+ (F)	22.6476	23.5	26.5621	18.5	1.69893	382.5	442.5		;36389/+; 8397/+ (F)	34.7587	16.5	47.4667	11	1.89095	466	515.5		;36389/9-137 G4;8397/tub80.ts(F)	42.4861	10.5	78.8409	8.5	1.25403	437.5	601
;9-137 G4/+;tub80.ts/+ (F)	60.3929	9.5	45.8182	9.5	1.59263	422.5	424.5		;36389/+; 8397/+ (F)	14.8627	11.5	8.8529	28	1.92408	238	249		;36389/9-137 G4;8397/tub80.ts(F)	65.8571	7	20.25	24	1.18105	461	419.5
;9-137 G4/+;tub80.ts/+ (F)	21.5089	15	17.4345	22.5	1.06933	315.5	390.5		;36389/+; 8397/+ (F)	72.6	5	9.38889	18	2.79295	363	169		;36389/9-137 G4;8397/tub80.ts(F)	7.91228	31	2.37143	8.5	1.39046	250.5	20.5
;9-137 G4/+;tub80.ts/+ (F)	11.4048	27.5	8.78176	33.5	0.81561	314	296.5		;36389/+; 8397/+ (F)	38.9444	12	32.7699	13.5	1.76908	407.5	405		;36389/9-137 G4;8397/tub80.ts(F)	22.9955	21	13.7189	32.5	0.987769	481.5	438
;9-137 G4/+;tub80.ts/+ (F)	13.2855	18	14.7865	18.5	1.52198	233.5	273.5		;36389/+; 8397/+ (F)	20.1336	16	71.1339	7.5	1.94223	293	528.5		;36389/9-137 G4;8397/tub80.ts(F)	42.9167	16	62.9333	10.5	1.41786	449	510.5
;9-137 G4/+;tub80.ts/+ (F)	20.4309	18	18.3	22	1.22398	306.5	396.5		;36389/+; 8397/+ (F)	80.6111	6	19	11	3.00316	386.5	209		;36389/9-137 G4;8397/tub80.ts(F)	96.9405	6.5	31.9333	12.5	2.09752	626.5	392
;9-137 G4/+;tub80.ts/+ (F)	28.6228	15.5	44.773	13.5	1.93757	408.5	465		;36389/+; 8397/+ (F)	23.3071	14.5	11.3224	24.5	1.76976	333.5	279		;36389/9-137 G4;8397/tub80.ts(F)	102.1	5.5	18.5901	16.5	1.65195	559	306.5
;9-137 G4/+;tub80.ts/+ (F)	20.3444	14	16.3509	18.5	1.38548	285	301		;36389/+; 8397/+ (F)	32.0833	12	53.6944	9.5	2.00226	385	508		;36389/9-137 G4;8397/tub80.ts(F)	119.208	5	71.7	7.5	1.66335	575.5	466
;9-137 G4/+;tub80.ts/+ (F)	13.4258	27.5	9.53091	33.5	1.0584	356.5	314		;36389/+; 8397/+ (F)	73.825	6.5	32.1912	13.5	2.50591	437	367		;36389/9-137 G4;8397/tub80.ts(F)	56	8	17.601	23	1.5422	448	394.5
;9-137 G4/+;tub80.ts/+ (F)	29.4221	16	19.9192	20	1.10052	386.5	399		;36389/+; 8397/+ (F)	35.8091	10.5	20.9	15	2.83349	373	313.5		;36389/9-137 G4;8397/tub80.ts(F)	42.3833	12.5	125.232	5.5	1.34374	506	643.5
;9-137 G4/+;tub80.ts/+ (F)	35.7773	10.5	23.6964	19	1.95277	369	410.5		;36389/+; 8397/+ (F)	103	4.5	34.1923	13	1.84581	444	444.5		;36389/9-137 G4;8397/tub80.ts(F)	60.7061	12.5	23.5877	18	1.22095	524	388
;9-137 G4/+;tub80.ts/+ (F)	32.6111	13.5	31.342	16	1.36375	343.5	415.5		;36389/+; 8397/+ (F)	41.3968	11.5	63.4722	7.5	1.70017	436.5	435.5		;36389/9-137 G4;8397/tub80.ts(F)	62.8786	8.5	26.4038	16.5	1.20823	513.5	415
;9-137 G4/+;tub80.ts/+ (F)	27.4575	16	29.0833	16	1.26693	419	404		;36389/+; 8397/+ (F)	61.0714	7	72.3286	6	1.56169	427.5	434.5		;36389/9-137 G4;8397/tub80.ts(F)	26.1402	11.5	12.4524	16.5	1.30452	304	203
;9-137 G4/+;tub80.ts/+ (F)	22.8864	11.5	17.5184	14.5	1.466	262.5	246		;36389/+; 8397/+ (F)	97.6667	8	50.9444	9.5	1.81656	428	483.5		;36389/9-137 G4;8397/tub80.ts(F)	125.881	5	24.4143	17	1.09949	518.5	389.5
;9-137 G4/+;tub80.ts/+ (F)	95.7917	7.5	36.6192	18	1.57494	345.5	494.5		;36389/+; 8397/+ (F)	22.5278	10.5	20.1203	20	1.35792	262.5	400		;36389/9-137 G4;8397/tub80.ts(F)	124.708	7	10.1286	6	2.16149	359	65.5
;9-137 G4/+;tub80.ts/+ (F)	16.3396	19.5	21.4564	23	1.0421	325.5	420		;36389/+; 8397/+ (F)	49.1364	9	76.7946	7.5	1.69271	406.5	572.5		;36389/9-137 G4;8397/tub80.ts(F)	58.4481	9	222.1	3.5	1.37181	495.5	626
;9-137 G4/+;tub80.ts/+ (F)	27.3281	17	48.875	11	1.58136	453.5	528.5		;36389/+; 8397/+ (F)	50.1667	7.5	48.4091	10	2.44164	336	472.5		;36389/9-137 G4;8397/tub80.ts(F)	56.6	9.5	17.3375	22	1.42459	418	385
;9-137 G4/+;tub80.ts/+ (F)	18.5326	20.5	70.0635	8	1.46847	377.5	551
;9-137 G4/+;tub80.ts/+ (F)	11.9554	21.5	47.0346	11.5	1.49962	248.5	525.5
;9-137 G4/+;tub80.ts/+ (F)	18.0676	18.5	13.6286	24	1.17151	337	306
;9-137 G4/+;tub80.ts/+ (F)	28.1957	17.5	59.2692	10.5	1.17665	412	583
;9-137 G4/+;tub80.ts/+ (F)	26.8389	14.5	43	11	1.7694	386.5	474.5
;9-137 G4/+;tub80.ts/+ (F)	61.9881	10	74.5417	9	1.42463	498.5	578.5
;9-137 G4/+;tub80.ts/+ (F)	52.1	10	6.52632	33	1.18669	521	216
;9-137 G4/+;tub80.ts/+ (F)	13.0889	16.5	47.3417	11	1.75831	224	518.5
PG+SPG>Mgl/Lrp1 RNAi at 18 degree
GAL80 ts Control	rD aLSE	rD aNSE	rN aLSE	rN aNSE	AI	rDS	rNS		UAS Control	rD aLSE	rD aNSE	rN aLSE	rN aNSE	AI	rDS	rNS		GAL80 ts x UAS	rD aLSE	rD aNSE	rN aLSE	rN aNSE	AI	rDS	rNS
;9-137 G4/+;tub80.ts/+ (F)	17.0556	7.66667	62.3796	10.3333	1.47438	142	605		;36389/+; 8397/+ (F)	24.1515	11.6667	59.4722	9.66667	2.69154	266.667	470		;36389/9-137 G4;8397/tub80.ts(F)	44.4071	5.33333	53.4118	12.3333	2.00273	214.667	451.333
;9-137 G4/+;tub80.ts/+ (F)	3.94444	5.33333	142.4	3.66667	1.61272	21.6667	468.667		;36389/+; 8397/+ (F)	28.6853	12.3333	91.2508	13	1.75333	352	553.333		;36389/9-137 G4;8397/tub80.ts(F)	3.93159	25.6667	119.616	6.66667	0.908809	102.333	603
;9-137 G4/+;tub80.ts/+ (F)	25.2937	8	190.611	3.66667	1.53319	205	564.667		;36389/+; 8397/+ (F)	28.3011	8.66667	149.083	4	1.7568	241.667	571.667		;36389/9-137 G4;8397/tub80.ts(F)	18.4708	11.6667	286.41	6.66667	0.943091	201.667	630.333
;9-137 G4/+;tub80.ts/+ (F)	8.96768	6.33333	101.574	9.66667	1.29501	54.3333	609.667		;36389/+; 8397/+ (F)	33.4491	7.66667	59.5595	12	1.98372	248.333	453		;36389/9-137 G4;8397/tub80.ts(F)	6.64909	31	90.1111	8	0.985644	206.667	642.333
;9-137 G4/+;tub80.ts/+ (F)	43.7818	8.66667	252.319	9	1.59193	330.333	552		;36389/+; 8397/+ (F)	13.745	11.6667	64.5397	8.66667	1.01341	156.667	510.667		;36389/9-137 G4;8397/tub80.ts(F)	6.125	5	34.4805	15.6667	1.43768	31.6667	503
;9-137 G4/+;tub80.ts/+ (F)	24.1333	7.66667	93.6667	7.33333	1.21222	162.667	553		;36389/+; 8397/+ (F)	19.5654	15.3333	155.313	5.66667	1.81316	290.667	610.667		;36389/9-137 G4;8397/tub80.ts(F)	8.12865	19.6667	31.4706	15.6667	1.12391	158	483
;9-137 G4/+;tub80.ts/+ (F)	16.8194	10	142.778	4.33333	1.80535	157.333	567		;36389/+; 8397/+ (F)	25.5493	11.3333	77.1077	9	1.85166	291	534		;36389/9-137 G4;8397/tub80.ts(F)	12.6889	5.66667	53.5412	12.6667	1.20373	75	521.333
;9-137 G4/+;tub80.ts/+ (F)	21.7436	10.3333	56.6065	18.3333	2.12282	217.333	542.667		;36389/+; 8397/+ (F)	32.4537	14.6667	187.324	5	1.45267	451.333	649.333		;36389/9-137 G4;8397/tub80.ts(F)	18.6528	15.6667	137.917	5.33333	0.992936	240	657.667
;9-137 G4/+;tub80.ts/+ (F)	29.4087	8.33333	69.6667	8	1.69805	228	557.333		;36389/+; 8397/+ (F)	3.3	10	19.66	20	1.79776	36.5	375.5		;36389/9-137 G4;8397/tub80.ts(F)	42.5833	6	138.893	5	1.13644	227	649
;9-137 G4/+;tub80.ts/+ (F)	26.9226	7.66667	46.711	12.3333	1.46887	206	547.667		;36389/+; 8397/+ (F)	4.58333	3.5	192.667	3	1.63308	16	578		;36389/9-137 G4;8397/tub80.ts(F)	18.1448	11.6667	40.4304	13.3333	1.4035	170.333	510.333
;9-137 G4/+;tub80.ts/+ (F)	2.62981	11	31.6873	15.6667	1.25258	28	431		;36389/+; 8397/+ (F)	14.2083	7	343.447	10	1.35993	98	603.5		;36389/9-137 G4;8397/tub80.ts(F)	23.5306	14.6667	77.1852	9	1.11621	333.333	637.667
;9-137 G4/+;tub80.ts/+ (F)	17.2748	16	51.7353	12.6667	1.6983	275	497		;36389/+; 8397/+ (F)	18.3571	8.5	446	2	1.36444	158.5	652		;36389/9-137 G4;8397/tub80.ts(F)	16.5866	8.66667	137.278	5	1.518	149.333	615
;9-137 G4/+;tub80.ts/+ (F)	29.1111	9	64.2821	14.3333	1.29239	262	570.333		;36389/+; 8397/+ (F)	27.0595	6.5	133.405	5	1.7593	175.5	554.5		;36389/9-137 G4;8397/tub80.ts(F)	3.82143	6.5	58.7436	9.5	2.20267	24.5	458
;9-137 G4/+;tub80.ts/+ (F)	30.1926	8.66667	46.745	12.6667	1.7702	255	555		;36389/+; 8397/+ (F)	16.9167	12	201.938	5	1.54599	203	633		;36389/9-137 G4;8397/tub80.ts(F)	52.9143	8.5	156	5	1.60752	437	644
;9-137 G4/+;tub80.ts/+ (F)	34.1143	5.66667	83.0317	10.6667	1.42851	188	573.333		;36389/+; 8397/+ (F)	32.6909	8	224.5	3.5	1.67999	230	624.5		;36389/9-137 G4;8397/tub80.ts(F)	24.6883	16	192.375	3.5	1.53726	343	663
;9-137 G4/+;tub80.ts/+ (F)	17.1333	16.6667	82.5417	8	0.945035	278.333	625		;36389/+; 8397/+ (F)	20.1429	7	93.7024	6.5	1.75118	141	605.5		;36389/9-137 G4;8397/tub80.ts(F)	23.2766	17	519.25	1.5	1.43755	368.5	690
;9-137 G4/+;tub80.ts/+ (F)	18.4524	17.5	517.5	1.5	1.37682	307	688		;36389/+; 8397/+ (F)	19.5667	4	206.25	4	2.00363	73.5	603.5		;36389/9-137 G4;8397/tub80.ts(F)	11.4495	10	76.8429	9.5	2.22771	115.5	547.5
;9-137 G4/+;tub80.ts/+ (F)	15.8083	11	179	3.5	1.87793	168.5	611.5		;36389/+; 8397/+ (F)	13.0556	9	426.167	2	1.44869	117.5	612.5		;36389/9-137 G4;8397/tub80.ts(F)	11.2426	16.5	64.6667	9.5	1.44469	185	611.5
;9-137 G4/+;tub80.ts/+ (F)	18.2105	17.5	138.375	5	1.06608	313	663.5		;36389/+; 8397/+ (F)	19.8583	11	363.038	7	1.45474	218	615.5		;36389/9-137 G4;8397/tub80.ts(F)	39.2538	11.5	201.977	6.5	1.36464	451.5	658
;9-137 G4/+;tub80.ts/+ (F)	27.2167	13	102.487	6.5	1.24749	220	630		;36389/+; 8397/+ (F)	18.8	8	81.4167	8	1.16274	127	602.5		;36389/9-137 G4;8397/tub80.ts(F)	31.3819	13	244.75	3	1.67478	340.5	646.5
;9-137 G4/+;tub80.ts/+ (F)	14.1875	9	92.3611	6.5	1.41038	128.5	502.5		;36389/+; 8397/+ (F)	25.8792	11.5	72.1	9	1.50627	260	508.5		;36389/9-137 G4;8397/tub80.ts(F)	27.6607	7.5	225.5	3	1.74486	208.5	599
;9-137 G4/+;tub80.ts/+ (F)	7.47596	10.5	162.5	4.5	1.27041	80	643		;36389/+; 8397/+ (F)	10.119	11	71.3393	7.5	1.20901	97.5	533.5		;36389/9-137 G4;8397/tub80.ts(F)	3.85	3.5	189.857	4.5	1.09239	9.5	549
;9-137 G4/+;tub80.ts/+ (F)	6.02976	13	135.708	5	1.06282	76.5	652		;36389/+; 8397/+ (F)	14.3539	12.5	224.375	3	1.65317	179	609.5		;36389/9-137 G4;8397/tub80.ts(F)	3.55208	11	45.8571	12.5	1.081	33.5	564
;9-137 G4/+;tub80.ts/+ (F)	9.10633	15	185.808	7.5	1.50669	128.5	611.5		;36389/+; 8397/+ (F)	24.75	6	125.125	4.5	1.85992	148.5	554.5		;36389/9-137 G4;8397/tub80.ts(F)	21.8625	9	103.583	8	1.00863	200	604
;9-137 G4/+;tub80.ts/+ (F)	14.4861	8.5	450	2	1.19737	122	662											;36389/9-137 G4;8397/tub80.ts(F)	11.9	15	521.5	1.5	0.973023	178.5	694.5
;9-137 G4/+;tub80.ts/+ (F)	16.5298	13	198.667	3.5	1.38132	215	680											;36389/9-137 G4;8397/tub80.ts(F)	9.50568	9.5	112.733	5.5	1.56255	89	613
;9-137 G4/+;tub80.ts/+ (F)	20.3988	13	154.25	4	1.06158	258.5	617											;36389/9-137 G4;8397/tub80.ts(F)	24.2206	14.5	216.167	3	1.2294	333	648.5
;9-137 G4/+;tub80.ts/+ (F)	37.7308	9.5	185.5	7	1.27645	287.5	603.5												28.375	5.5	241.375	3	1.19094	139.5	632
;9-137 G4/+;tub80.ts/+ (F)	12.0625	6	67.75	11	1.34867	82.5	586.5
;9-137 G4/+;tub80.ts/+ (F)	23.4885	11.5	524.25	1.5	1.3328	272.5	700
;9-137 G4/+;tub80.ts/+ (F)	52.7639	8.5	202.05	6	1.01095	450	648.5
;9-137 G4/+;tub80.ts/+ (F)	16.5417	5	273.5	2.5	1.89653	90.5	655.5
