# Supplementary material for: Modulation of sleep by trafficking of lipids through the Drosophila blood-brain barrier
Source: eLife. 2023 May 4;12:e86336. doi: 10.7554/eLife.86336 (PMC10205086; doi:10.7554/eLife.86336)
Supplement: Figure 3—figure supplement 4—source data 1. [file elife-86336-fig3-figsupp4-data1.xlsx]

## Sheet: Sheet1
PG+SPG>Mgl/Lrp1 RNAi at 31 degree
GAL80 ts Control	Total sleep		UAS Control	Total sleep		GAL80 ts x UAS	Total sleep
;9-137 G4/+;tub80.ts/+ (F)	953.5		;27242/+; 8397/+ (F)	972		;27242/9-137 G4;8397/tub80.ts(F)	1106
;9-137 G4/+;tub80.ts/+ (F)	759		;27242/+; 8397/+ (F)	812		;27242/9-137 G4;8397/tub80.ts(F)	919.5
;9-137 G4/+;tub80.ts/+ (F)	1031.5		;27242/+; 8397/+ (F)	522		;27242/9-137 G4;8397/tub80.ts(F)	956
;9-137 G4/+;tub80.ts/+ (F)	610.5		;27242/+; 8397/+ (F)	660.5		;27242/9-137 G4;8397/tub80.ts(F)	966.5
;9-137 G4/+;tub80.ts/+ (F)	674.5		;27242/+; 8397/+ (F)	708.5		;27242/9-137 G4;8397/tub80.ts(F)	769
;9-137 G4/+;tub80.ts/+ (F)	968.5		;27242/+; 8397/+ (F)	475.5		;27242/9-137 G4;8397/tub80.ts(F)	972
;9-137 G4/+;tub80.ts/+ (F)	1040		;27242/+; 8397/+ (F)	864.5		;27242/9-137 G4;8397/tub80.ts(F)	1065.5
;9-137 G4/+;tub80.ts/+ (F)	1230		;27242/+; 8397/+ (F)	659		;27242/9-137 G4;8397/tub80.ts(F)	1136
;9-137 G4/+;tub80.ts/+ (F)	967		;27242/+; 8397/+ (F)	794.5		;27242/9-137 G4;8397/tub80.ts(F)	1103
;9-137 G4/+;tub80.ts/+ (F)	1052		;27242/+; 8397/+ (F)	689		;27242/9-137 G4;8397/tub80.ts(F)	954.5
;9-137 G4/+;tub80.ts/+ (F)	782		;27242/+; 8397/+ (F)	704		;27242/9-137 G4;8397/tub80.ts(F)	510.5
;9-137 G4/+;tub80.ts/+ (F)	685.5		;27242/+; 8397/+ (F)	644		;27242/9-137 G4;8397/tub80.ts(F)	745
;9-137 G4/+;tub80.ts/+ (F)	945.5		;27242/+; 8397/+ (F)	1047		;27242/9-137 G4;8397/tub80.ts(F)	1113.5
;9-137 G4/+;tub80.ts/+ (F)	684		;27242/+; 8397/+ (F)	162		;27242/9-137 G4;8397/tub80.ts(F)	951.5
;9-137 G4/+;tub80.ts/+ (F)	1007		;27242/+; 8397/+ (F)	710		;27242/9-137 G4;8397/tub80.ts(F)	1109.5
;9-137 G4/+;tub80.ts/+ (F)	474		;27242/+; 8397/+ (F)	938		;27242/9-137 G4;8397/tub80.ts(F)	1099.5
;9-137 G4/+;tub80.ts/+ (F)	737.5		;27242/+; 8397/+ (F)	530.5		;27242/9-137 G4;8397/tub80.ts(F)	873.5
;9-137 G4/+;tub80.ts/+ (F)	938		;27242/+; 8397/+ (F)	732.5		;27242/9-137 G4;8397/tub80.ts(F)	770.5
;9-137 G4/+;tub80.ts/+ (F)	958.5		;27242/+; 8397/+ (F)	335		;27242/9-137 G4;8397/tub80.ts(F)	702.5
;9-137 G4/+;tub80.ts/+ (F)	756		;27242/+; 8397/+ (F)	517		;27242/9-137 G4;8397/tub80.ts(F)	934
;9-137 G4/+;tub80.ts/+ (F)	1087.5		;27242/+; 8397/+ (F)	677.5		;27242/9-137 G4;8397/tub80.ts(F)	541
;9-137 G4/+;tub80.ts/+ (F)	956		;27242/+; 8397/+ (F)	631.5		;27242/9-137 G4;8397/tub80.ts(F)	931
;9-137 G4/+;tub80.ts/+ (F)	776		;27242/+; 8397/+ (F)	711		;27242/9-137 G4;8397/tub80.ts(F)	907.5
;9-137 G4/+;tub80.ts/+ (F)	993.5		;27242/+; 8397/+ (F)	780		;27242/9-137 G4;8397/tub80.ts(F)	885
;9-137 G4/+;tub80.ts/+ (F)	1017		;27242/+; 8397/+ (F)	311.5		;27242/9-137 G4;8397/tub80.ts(F)	473
;9-137 G4/+;tub80.ts/+ (F)	445.5		;27242/+; 8397/+ (F)	194.5		;27242/9-137 G4;8397/tub80.ts(F)	823
;9-137 G4/+;tub80.ts/+ (F)	803		;27242/+; 8397/+ (F)	285		;27242/9-137 G4;8397/tub80.ts(F)	547
;9-137 G4/+;tub80.ts/+ (F)	466.5		;27242/+; 8397/+ (F)	458		;27242/9-137 G4;8397/tub80.ts(F)	1203.5
;9-137 G4/+;tub80.ts/+ (F)	798.5		;27242/+; 8397/+ (F)	391.5		;27242/9-137 G4;8397/tub80.ts(F)	522.5
;9-137 G4/+;tub80.ts/+ (F)	990.5		;27242/+; 8397/+ (F)	657.5		;27242/9-137 G4;8397/tub80.ts(F)	875.5
;9-137 G4/+;tub80.ts/+ (F)	738		;27242/+; 8397/+ (F)	872		;27242/9-137 G4;8397/tub80.ts(F)	687.5
;9-137 G4/+;tub80.ts/+ (F)	694		;27242/+; 8397/+ (F)	799.5		;27242/9-137 G4;8397/tub80.ts(F)	534
;9-137 G4/+;tub80.ts/+ (F)	916.5		;27242/+; 8397/+ (F)	940.5		;27242/9-137 G4;8397/tub80.ts(F)	466
;9-137 G4/+;tub80.ts/+ (F)	494		;27242/+; 8397/+ (F)	679.5		;27242/9-137 G4;8397/tub80.ts(F)	604.5
;9-137 G4/+;tub80.ts/+ (F)	597		;27242/+; 8397/+ (F)	834		;27242/9-137 G4;8397/tub80.ts(F)	568.5
;9-137 G4/+;tub80.ts/+ (F)	426.5		;27242/+; 8397/+ (F)	525.5		;27242/9-137 G4;8397/tub80.ts(F)	529.5
;9-137 G4/+;tub80.ts/+ (F)	715		;27242/+; 8397/+ (F)	894.5		;27242/9-137 G4;8397/tub80.ts(F)	748.5
;9-137 G4/+;tub80.ts/+ (F)	437		;27242/+; 8397/+ (F)	876		;27242/9-137 G4;8397/tub80.ts(F)	655.5
;9-137 G4/+;tub80.ts/+ (F)	592		;27242/+; 8397/+ (F)	262.5		;27242/9-137 G4;8397/tub80.ts(F)	616
;9-137 G4/+;tub80.ts/+ (F)	825		;27242/+; 8397/+ (F)	877.5		;27242/9-137 G4;8397/tub80.ts(F)	597.5
;9-137 G4/+;tub80.ts/+ (F)	847		;27242/+; 8397/+ (F)	692		;27242/9-137 G4;8397/tub80.ts(F)	328
;9-137 G4/+;tub80.ts/+ (F)	706		;27242/+; 8397/+ (F)	657.5		;27242/9-137 G4;8397/tub80.ts(F)	467.5
;9-137 G4/+;tub80.ts/+ (F)	610.5		;27242/+; 8397/+ (F)	860.5
;9-137 G4/+;tub80.ts/+ (F)	507		;27242/+; 8397/+ (F)	688.5
;9-137 G4/+;tub80.ts/+ (F)	703		;27242/+; 8397/+ (F)	523.5
;9-137 G4/+;tub80.ts/+ (F)	873.5		;27242/+; 8397/+ (F)	862
;9-137 G4/+;tub80.ts/+ (F)	586
;9-137 G4/+;tub80.ts/+ (F)	670.5
PG+SPG>Mgl/Lrp1 RNAi at 18 degree
;9-137 G4/+;tub80.ts/+ (F)	788		;27242/+; 8397/+ (F)	894		;27242/9-137 G4;8397/tub80.ts(F)	1066.5
;9-137 G4/+;tub80.ts/+ (F)	857		;27242/+; 8397/+ (F)	818.5		;27242/9-137 G4;8397/tub80.ts(F)	734.5
;9-137 G4/+;tub80.ts/+ (F)	1018		;27242/+; 8397/+ (F)	566		;27242/9-137 G4;8397/tub80.ts(F)	694.5
;9-137 G4/+;tub80.ts/+ (F)	688		;27242/+; 8397/+ (F)	677		;27242/9-137 G4;8397/tub80.ts(F)	736
;9-137 G4/+;tub80.ts/+ (F)	698		;27242/+; 8397/+ (F)	898		;27242/9-137 G4;8397/tub80.ts(F)	653
;9-137 G4/+;tub80.ts/+ (F)	797		;27242/+; 8397/+ (F)	553		;27242/9-137 G4;8397/tub80.ts(F)	659.5
;9-137 G4/+;tub80.ts/+ (F)	759.5		;27242/+; 8397/+ (F)	742.5		;27242/9-137 G4;8397/tub80.ts(F)	880
;9-137 G4/+;tub80.ts/+ (F)	981.5		;27242/+; 8397/+ (F)	580		;27242/9-137 G4;8397/tub80.ts(F)	1030.5
;9-137 G4/+;tub80.ts/+ (F)	647		;27242/+; 8397/+ (F)	838.5		;27242/9-137 G4;8397/tub80.ts(F)	869
;9-137 G4/+;tub80.ts/+ (F)	964		;27242/+; 8397/+ (F)	659.5		;27242/9-137 G4;8397/tub80.ts(F)	874.5
;9-137 G4/+;tub80.ts/+ (F)	738		;27242/+; 8397/+ (F)	680.5		;27242/9-137 G4;8397/tub80.ts(F)	622
;9-137 G4/+;tub80.ts/+ (F)	636.5		;27242/+; 8397/+ (F)	651.5		;27242/9-137 G4;8397/tub80.ts(F)	611.5
;9-137 G4/+;tub80.ts/+ (F)	724		;27242/+; 8397/+ (F)	853		;27242/9-137 G4;8397/tub80.ts(F)	732.5
;9-137 G4/+;tub80.ts/+ (F)	799.5		;27242/+; 8397/+ (F)	486		;27242/9-137 G4;8397/tub80.ts(F)	678.5
;9-137 G4/+;tub80.ts/+ (F)	936		;27242/+; 8397/+ (F)	659.5		;27242/9-137 G4;8397/tub80.ts(F)	1088
;9-137 G4/+;tub80.ts/+ (F)	575		;27242/+; 8397/+ (F)	664.5		;27242/9-137 G4;8397/tub80.ts(F)	794
;9-137 G4/+;tub80.ts/+ (F)	666		;27242/+; 8397/+ (F)	728.5		;27242/9-137 G4;8397/tub80.ts(F)	963.5
;9-137 G4/+;tub80.ts/+ (F)	831.5		;27242/+; 8397/+ (F)	670.5		;27242/9-137 G4;8397/tub80.ts(F)	765.5
;9-137 G4/+;tub80.ts/+ (F)	856.5		;27242/+; 8397/+ (F)	653		;27242/9-137 G4;8397/tub80.ts(F)	658
;9-137 G4/+;tub80.ts/+ (F)	690		;27242/+; 8397/+ (F)	697		;27242/9-137 G4;8397/tub80.ts(F)	897.5
;9-137 G4/+;tub80.ts/+ (F)	964.5		;27242/+; 8397/+ (F)	738		;27242/9-137 G4;8397/tub80.ts(F)	585.5
;9-137 G4/+;tub80.ts/+ (F)	795		;27242/+; 8397/+ (F)	734		;27242/9-137 G4;8397/tub80.ts(F)	676
;9-137 G4/+;tub80.ts/+ (F)	695		;27242/+; 8397/+ (F)	837		;27242/9-137 G4;8397/tub80.ts(F)	694
;9-137 G4/+;tub80.ts/+ (F)	791		;27242/+; 8397/+ (F)	782		;27242/9-137 G4;8397/tub80.ts(F)	625
;9-137 G4/+;tub80.ts/+ (F)	952.5		;27242/+; 8397/+ (F)	526		;27242/9-137 G4;8397/tub80.ts(F)	561.5
;9-137 G4/+;tub80.ts/+ (F)	597		;27242/+; 8397/+ (F)	577.5		;27242/9-137 G4;8397/tub80.ts(F)	774.5
;9-137 G4/+;tub80.ts/+ (F)	904		;27242/+; 8397/+ (F)	619		;27242/9-137 G4;8397/tub80.ts(F)	657.5
;9-137 G4/+;tub80.ts/+ (F)	608.5		;27242/+; 8397/+ (F)	810		;27242/9-137 G4;8397/tub80.ts(F)	901
;9-137 G4/+;tub80.ts/+ (F)	843.5		;27242/+; 8397/+ (F)	603.5		;27242/9-137 G4;8397/tub80.ts(F)	672
;9-137 G4/+;tub80.ts/+ (F)	845.5		;27242/+; 8397/+ (F)	732.5		;27242/9-137 G4;8397/tub80.ts(F)	724.5
;9-137 G4/+;tub80.ts/+ (F)	557		;27242/+; 8397/+ (F)	832		;27242/9-137 G4;8397/tub80.ts(F)	625
;9-137 G4/+;tub80.ts/+ (F)	661.5		;27242/+; 8397/+ (F)	788.5		;27242/9-137 G4;8397/tub80.ts(F)	688.5
;9-137 G4/+;tub80.ts/+ (F)	776		;27242/+; 8397/+ (F)	1020		;27242/9-137 G4;8397/tub80.ts(F)	826.333
;9-137 G4/+;tub80.ts/+ (F)	754.667		;27242/+; 8397/+ (F)	934.667		;27242/9-137 G4;8397/tub80.ts(F)	567.667
;9-137 G4/+;tub80.ts/+ (F)	693.333		;27242/+; 8397/+ (F)	822.667		;27242/9-137 G4;8397/tub80.ts(F)	785.667
;9-137 G4/+;tub80.ts/+ (F)	665		;27242/+; 8397/+ (F)	724		;27242/9-137 G4;8397/tub80.ts(F)	825
;9-137 G4/+;tub80.ts/+ (F)	829.333		;27242/+; 8397/+ (F)	882		;27242/9-137 G4;8397/tub80.ts(F)	853.667
;9-137 G4/+;tub80.ts/+ (F)	684.667		;27242/+; 8397/+ (F)	879.333		;27242/9-137 G4;8397/tub80.ts(F)	562.667
;9-137 G4/+;tub80.ts/+ (F)	913		;27242/+; 8397/+ (F)	577.667		;27242/9-137 G4;8397/tub80.ts(F)	622.333
;9-137 G4/+;tub80.ts/+ (F)	645.333		;27242/+; 8397/+ (F)	799.333		;27242/9-137 G4;8397/tub80.ts(F)	663.333
;9-137 G4/+;tub80.ts/+ (F)	563.333		;27242/+; 8397/+ (F)	726		;27242/9-137 G4;8397/tub80.ts(F)	546.667
;9-137 G4/+;tub80.ts/+ (F)	629		;27242/+; 8397/+ (F)	741.667		;27242/9-137 G4;8397/tub80.ts(F)	553.333
;9-137 G4/+;tub80.ts/+ (F)	705.333		;27242/+; 8397/+ (F)	912.333
;9-137 G4/+;tub80.ts/+ (F)	908.667		;27242/+; 8397/+ (F)	590.667
;9-137 G4/+;tub80.ts/+ (F)	729.667		;27242/+; 8397/+ (F)	651.667
;9-137 G4/+;tub80.ts/+ (F)	725		;27242/+; 8397/+ (F)	786
;9-137 G4/+;tub80.ts/+ (F)	794
;9-137 G4/+;tub80.ts/+ (F)	671.667
