# Supplementary material for: Modulation of sleep by trafficking of lipids through the Drosophila blood-brain barrier
Source: eLife. 2023 May 4;12:e86336. doi: 10.7554/eLife.86336 (PMC10205086; doi:10.7554/eLife.86336)
Supplement: Figure 3—figure supplement 5—source data 1. [file elife-86336-fig3-figsupp5-data1.xlsx]

## Sheet: Sheet1
18 degree										31 degree
GAL4 tub80 ts Control	Total sleep		UAS Control	Total sleep		GAL4 tub80 ts x UAS	Total sleep			GAL4 tub80 ts Control	Total sleep		UAS Control	Total sleep		GAL4 tub80 ts x UAS	Total sleep
;9-137G4/+;tub80.ts/+(F)	1009		;;8397/+(F)	678		;9-137G4/+;8397/tub80.ts	1001			;9-137G4/+;tub80.ts/+(F)	725		;;8397/+(F)	593		;9-137G4/+;8397/tub80.ts	870
;9-137G4/+;tub80.ts/+(F)	906		;;8397/+(F)	567		;9-137G4/+;8397/tub80.ts	894			;9-137G4/+;tub80.ts/+(F)	428		;;8397/+(F)	347		;9-137G4/+;8397/tub80.ts	838
;9-137G4/+;tub80.ts/+(F)	973		;;8397/+(F)	658		;9-137G4/+;8397/tub80.ts	857			;9-137G4/+;tub80.ts/+(F)	653		;;8397/+(F)	537		;9-137G4/+;8397/tub80.ts	905
;9-137G4/+;tub80.ts/+(F)	902		;;8397/+(F)	645		;9-137G4/+;8397/tub80.ts	770			;9-137G4/+;tub80.ts/+(F)	709		;;8397/+(F)	504		;9-137G4/+;8397/tub80.ts	730
;9-137G4/+;tub80.ts/+(F)	1011		;;8397/+(F)	958		;9-137G4/+;8397/tub80.ts	984			;9-137G4/+;tub80.ts/+(F)	772		;;8397/+(F)	675		;9-137G4/+;8397/tub80.ts	1086
;9-137G4/+;tub80.ts/+(F)	880		;;8397/+(F)	602		;9-137G4/+;8397/tub80.ts	768			;9-137G4/+;tub80.ts/+(F)	585		;;8397/+(F)	798		;9-137G4/+;8397/tub80.ts	852
;9-137G4/+;tub80.ts/+(F)	980		;;8397/+(F)	963		;9-137G4/+;8397/tub80.ts	765			;9-137G4/+;tub80.ts/+(F)	733		;;8397/+(F)	851		;9-137G4/+;8397/tub80.ts	977
;9-137G4/+;tub80.ts/+(F)	914		;;8397/+(F)	967		;9-137G4/+;8397/tub80.ts	778			;9-137G4/+;tub80.ts/+(F)	706		;;8397/+(F)	731		;9-137G4/+;8397/tub80.ts	832
;9-137G4/+;tub80.ts/+(F)	753		;;8397/+(F)	870		;9-137G4/+;8397/tub80.ts	988			;9-137G4/+;tub80.ts/+(F)	886		;;8397/+(F)	782		;9-137G4/+;8397/tub80.ts	933
;9-137G4/+;tub80.ts/+(F)	958		;;8397/+(F)	568		;9-137G4/+;8397/tub80.ts	714			;9-137G4/+;tub80.ts/+(F)	964		;;8397/+(F)	344		;9-137G4/+;8397/tub80.ts	701
;9-137G4/+;tub80.ts/+(F)	712		;;8397/+(F)	923		;9-137G4/+;8397/tub80.ts	762			;9-137G4/+;tub80.ts/+(F)	721		;;8397/+(F)	969		;9-137G4/+;8397/tub80.ts	699
;9-137G4/+;tub80.ts/+(F)	813		;;8397/+(F)	924		;9-137G4/+;8397/tub80.ts	709			;9-137G4/+;tub80.ts/+(F)	762		;;8397/+(F)	1121		;9-137G4/+;8397/tub80.ts	527
;9-137G4/+;tub80.ts/+(F)	825		;;8397/+(F)	727		;9-137G4/+;8397/tub80.ts	528			;9-137G4/+;tub80.ts/+(F)	895		;;8397/+(F)	677		;9-137G4/+;8397/tub80.ts	146
;9-137G4/+;tub80.ts/+(F)	822		;;8397/+(F)	902		;9-137G4/+;8397/tub80.ts	848			;9-137G4/+;tub80.ts/+(F)	887		;;8397/+(F)	837		;9-137G4/+;8397/tub80.ts	862
;9-137G4/+;tub80.ts/+(F)	797		;;8397/+(F)	513		;9-137G4/+;8397/tub80.ts	1025			;9-137G4/+;tub80.ts/+(F)	1024		;;8397/+(F)	390		;9-137G4/+;8397/tub80.ts	997
;9-137G4/+;tub80.ts/+(F)	781		;;8397/+(F)	939		;9-137G4/+;8397/tub80.ts	972			;9-137G4/+;tub80.ts/+(F)	909		;;8397/+(F)	870		;9-137G4/+;8397/tub80.ts	993
;9-137G4/+;tub80.ts/+(F)	753		;;8397/+(F)	966		;9-137G4/+;8397/tub80.ts	782			;9-137G4/+;tub80.ts/+(F)	979		;;8397/+(F)	1104		;9-137G4/+;8397/tub80.ts	915
;9-137G4/+;tub80.ts/+(F)	770		;;8397/+(F)	669		;9-137G4/+;8397/tub80.ts	812			;9-137G4/+;tub80.ts/+(F)	906		;;8397/+(F)	907		;9-137G4/+;8397/tub80.ts	987
;9-137G4/+;tub80.ts/+(F)	662		;;8397/+(F)	659		;9-137G4/+;8397/tub80.ts	947			;9-137G4/+;tub80.ts/+(F)	1063		;;8397/+(F)	997		;9-137G4/+;8397/tub80.ts	973
;9-137G4/+;tub80.ts/+(F)	939		;;8397/+(F)	670		;9-137G4/+;8397/tub80.ts	792			;9-137G4/+;tub80.ts/+(F)	870		;;8397/+(F)	946		;9-137G4/+;8397/tub80.ts	969
;9-137G4/+;tub80.ts/+(F)	828		;;8397/+(F)	788		;9-137G4/+;8397/tub80.ts	873			;9-137G4/+;tub80.ts/+(F)	1045		;;8397/+(F)	990		;9-137G4/+;8397/tub80.ts	1028
;9-137G4/+;tub80.ts/+(F)	946		;;8397/+(F)	857		;9-137G4/+;8397/tub80.ts	812			;9-137G4/+;tub80.ts/+(F)	922		;;8397/+(F)	1013		;9-137G4/+;8397/tub80.ts	945
;9-137G4/+;tub80.ts/+(F)	783		;;8397/+(F)	672		;9-137G4/+;8397/tub80.ts	769			;9-137G4/+;tub80.ts/+(F)	929		;;8397/+(F)	685		;9-137G4/+;8397/tub80.ts	956
;9-137G4/+;tub80.ts/+(F)	728		;;8397/+(F)	689		;9-137G4/+;8397/tub80.ts	939						;;8397/+(F)	1008		;9-137G4/+;8397/tub80.ts	980
			;;8397/+(F)	639		;9-137G4/+;8397/tub80.ts	692						;;8397/+(F)	962		;9-137G4/+;8397/tub80.ts	918
			;;8397/+(F)	708		;9-137G4/+;8397/tub80.ts	741						;;8397/+(F)	1020		;9-137G4/+;8397/tub80.ts	913
			;;8397/+(F)	882		;9-137G4/+;8397/tub80.ts	875						;;8397/+(F)	971		;9-137G4/+;8397/tub80.ts	1103
			;;8397/+(F)	667		;9-137G4/+;8397/tub80.ts	824						;;8397/+(F)	993		;9-137G4/+;8397/tub80.ts	1045
			;;8397/+(F)	651		;9-137G4/+;8397/tub80.ts	1009						;;8397/+(F)	1044		;9-137G4/+;8397/tub80.ts	990
			;;8397/+(F)	894		;9-137G4/+;8397/tub80.ts	912						;;8397/+(F)	1125		;9-137G4/+;8397/tub80.ts	972
			;;8397/+(F)	607		;9-137G4/+;8397/tub80.ts	835						;;8397/+(F)	915		;9-137G4/+;8397/tub80.ts	941
			;;8397/+(F)	694		;9-137G4/+;8397/tub80.ts	978						;;8397/+(F)	928		;9-137G4/+;8397/tub80.ts	953
;9-137G4/+;tub80.ts/+(F)	1009		;109605/+(F)	830		;109605/9-137G4;tub80.ts/+	923			;9-137G4/+;tub80.ts/+(F)	725		;109605/+(F)	1155		;9-137G4/+;tub80.ts/+(F)	876
;9-137G4/+;tub80.ts/+(F)	906		;109605/+(F)	940		;109605/9-137G4;tub80.ts/+	788			;9-137G4/+;tub80.ts/+(F)	428		;109605/+(F)	1081		;9-137G4/+;tub80.ts/+(F)	838
;9-137G4/+;tub80.ts/+(F)	973		;109605/+(F)	809		;109605/9-137G4;tub80.ts/+	855			;9-137G4/+;tub80.ts/+(F)	653		;109605/+(F)	1070		;9-137G4/+;tub80.ts/+(F)	879
;9-137G4/+;tub80.ts/+(F)	902		;109605/+(F)	887		;109605/9-137G4;tub80.ts/+	915			;9-137G4/+;tub80.ts/+(F)	709		;109605/+(F)	1015		;9-137G4/+;tub80.ts/+(F)	958
;9-137G4/+;tub80.ts/+(F)	1011		;109605/+(F)	858		;109605/9-137G4;tub80.ts/+	861			;9-137G4/+;tub80.ts/+(F)	772		;109605/+(F)	1087		;9-137G4/+;tub80.ts/+(F)	1043
;9-137G4/+;tub80.ts/+(F)	880		;109605/+(F)	724		;109605/9-137G4;tub80.ts/+	1136			;9-137G4/+;tub80.ts/+(F)	585		;109605/+(F)	940		;9-137G4/+;tub80.ts/+(F)	1122
;9-137G4/+;tub80.ts/+(F)	980		;109605/+(F)	697		;109605/9-137G4;tub80.ts/+	837			;9-137G4/+;tub80.ts/+(F)	733		;109605/+(F)	923		;9-137G4/+;tub80.ts/+(F)	911
;9-137G4/+;tub80.ts/+(F)	914		;109605/+(F)	649		;109605/9-137G4;tub80.ts/+	1130			;9-137G4/+;tub80.ts/+(F)	706		;109605/+(F)	846		;9-137G4/+;tub80.ts/+(F)	931
;9-137G4/+;tub80.ts/+(F)	753		;109605/+(F)	892		;109605/9-137G4;tub80.ts/+	922			;9-137G4/+;tub80.ts/+(F)	886		;109605/+(F)	1066		;9-137G4/+;tub80.ts/+(F)	938
;9-137G4/+;tub80.ts/+(F)	958		;109605/+(F)	828		;109605/9-137G4;tub80.ts/+	764			;9-137G4/+;tub80.ts/+(F)	964		;109605/+(F)	1012		;9-137G4/+;tub80.ts/+(F)	958
;9-137G4/+;tub80.ts/+(F)	712		;109605/+(F)	695		;109605/9-137G4;tub80.ts/+	691			;9-137G4/+;tub80.ts/+(F)	721		;109605/+(F)	1058		;9-137G4/+;tub80.ts/+(F)	855
;9-137G4/+;tub80.ts/+(F)	813		;109605/+(F)	839		;109605/9-137G4;tub80.ts/+	775			;9-137G4/+;tub80.ts/+(F)	762		;109605/+(F)	966		;9-137G4/+;tub80.ts/+(F)	574
;9-137G4/+;tub80.ts/+(F)	825		;109605/+(F)	847		;109605/9-137G4;tub80.ts/+	1067			;9-137G4/+;tub80.ts/+(F)	895		;109605/+(F)	1125		;9-137G4/+;tub80.ts/+(F)	936
;9-137G4/+;tub80.ts/+(F)	822		;109605/+(F)	812		;109605/9-137G4;tub80.ts/+	918			;9-137G4/+;tub80.ts/+(F)	887		;109605/+(F)	1104		;9-137G4/+;tub80.ts/+(F)	854
;9-137G4/+;tub80.ts/+(F)	797		;109605/+(F)	720		;109605/9-137G4;tub80.ts/+	872			;9-137G4/+;tub80.ts/+(F)	1024		;109605/+(F)	986		;9-137G4/+;tub80.ts/+(F)	819
;9-137G4/+;tub80.ts/+(F)	781		;109605/+(F)	712		;109605/9-137G4;tub80.ts/+	958			;9-137G4/+;tub80.ts/+(F)	909		;109605/+(F)	865		;9-137G4/+;tub80.ts/+(F)	983
;9-137G4/+;tub80.ts/+(F)	753		;109605/+(F)	862		;109605/9-137G4;tub80.ts/+	561			;9-137G4/+;tub80.ts/+(F)	979		;109605/+(F)	1087		;9-137G4/+;tub80.ts/+(F)	923
;9-137G4/+;tub80.ts/+(F)	770		;109605/+(F)	878		;109605/9-137G4;tub80.ts/+	693			;9-137G4/+;tub80.ts/+(F)	906		;109605/+(F)	1114		;9-137G4/+;tub80.ts/+(F)	945
;9-137G4/+;tub80.ts/+(F)	662		;109605/+(F)	766		;109605/9-137G4;tub80.ts/+	896			;9-137G4/+;tub80.ts/+(F)	1063		;109605/+(F)	982		;9-137G4/+;tub80.ts/+(F)	907
;9-137G4/+;tub80.ts/+(F)	939		;109605/+(F)	879		;109605/9-137G4;tub80.ts/+	716			;9-137G4/+;tub80.ts/+(F)	870		;109605/+(F)	956.5		;9-137G4/+;tub80.ts/+(F)	968
;9-137G4/+;tub80.ts/+(F)	828		;109605/+(F)	942		;109605/9-137G4;tub80.ts/+	963			;9-137G4/+;tub80.ts/+(F)	1045		;109605/+(F)	1138		;9-137G4/+;tub80.ts/+(F)	998
;9-137G4/+;tub80.ts/+(F)	946		;109605/+(F)	824		;109605/9-137G4;tub80.ts/+	928			;9-137G4/+;tub80.ts/+(F)	922		;109605/+(F)	1019		;9-137G4/+;tub80.ts/+(F)	988
;9-137G4/+;tub80.ts/+(F)	783		;109605/+(F)	702		;109605/9-137G4;tub80.ts/+	960			;9-137G4/+;tub80.ts/+(F)	929		;109605/+(F)	923		;9-137G4/+;tub80.ts/+(F)	989
;9-137G4/+;tub80.ts/+(F)	728		;109605/+(F)	733		;109605/9-137G4;tub80.ts/+	844			;9-137G4/+;tub80.ts/+(F)	1015		;109605/+(F)	924		;9-137G4/+;tub80.ts/+(F)	1065
;9-137G4/+;tub80.ts/+(F)	935.667		;109605/+(F)	873		;109605/9-137G4;tub80.ts/+	1031			;9-137G4/+;tub80.ts/+(F)	1177		;109605/+(F)	1044		;9-137G4/+;tub80.ts/+(F)	941
;9-137G4/+;tub80.ts/+(F)	864.333		;109605/+(F)	9483		;109605/9-137G4;tub80.ts/+	912			;9-137G4/+;tub80.ts/+(F)	1140.5		;109605/+(F)	1008		;9-137G4/+;tub80.ts/+(F)	990
;9-137G4/+;tub80.ts/+(F)	827		;109605/+(F)	992		;109605/9-137G4;tub80.ts/+	850			;9-137G4/+;tub80.ts/+(F)	883		;109605/+(F)	1092		;9-137G4/+;tub80.ts/+(F)	867
;9-137G4/+;tub80.ts/+(F)	650.333		;109605/+(F)	929		;109605/9-137G4;tub80.ts/+	1083			;9-137G4/+;tub80.ts/+(F)	996		;109605/+(F)	1014		;9-137G4/+;tub80.ts/+(F)	604
;9-137G4/+;tub80.ts/+(F)	790.333		;109605/+(F)	9013		;109605/9-137G4;tub80.ts/+	1108			;9-137G4/+;tub80.ts/+(F)	889		;109605/+(F)	1113		;9-137G4/+;tub80.ts/+(F)	979
;9-137G4/+;tub80.ts/+(F)	567.333		;109605/+(F)	766		;109605/9-137G4;tub80.ts/+	845			;9-137G4/+;tub80.ts/+(F)	1041		;109605/+(F)	997		;9-137G4/+;tub80.ts/+(F)	829
;9-137G4/+;tub80.ts/+(F)	806.667		;109605/+(F)	825		;109605/9-137G4;tub80.ts/+	664			;9-137G4/+;tub80.ts/+(F)	1191		;109605/+(F)	958		;9-137G4/+;tub80.ts/+(F)	899
;9-137G4/+;tub80.ts/+(F)	1108.67		;109605/+(F)	959		;109605/9-137G4;tub80.ts/+	880			;9-137G4/+;tub80.ts/+(F)	1001		;109605/+(F)	964		;9-137G4/+;tub80.ts/+(F)	910
;9-137G4/+;tub80.ts/+(F)	925.667		;109605/+(F)	727		;109605/9-137G4;tub80.ts/+	913.667			;9-137G4/+;tub80.ts/+(F)	1121		;109605/+(F)	1010		;9-137G4/+;tub80.ts/+(F)	1079.5
;9-137G4/+;tub80.ts/+(F)	854.667		;109605/+(F)	835.667		;109605/9-137G4;tub80.ts/+	1003.33			;9-137G4/+;tub80.ts/+(F)	926.5		;109605/+(F)	1155		;9-137G4/+;tub80.ts/+(F)	1283.5
;9-137G4/+;tub80.ts/+(F)	806.667		;109605/+(F)	781.667		;109605/9-137G4;tub80.ts/+	996			;9-137G4/+;tub80.ts/+(F)	913.5		;109605/+(F)	1003.5		;9-137G4/+;tub80.ts/+(F)	1130.5
;9-137G4/+;tub80.ts/+(F)	623		;109605/+(F)	694		;109605/9-137G4;tub80.ts/+	751			;9-137G4/+;tub80.ts/+(F)	1087		;109605/+(F)	1081		;9-137G4/+;tub80.ts/+(F)	1134.5
;9-137G4/+;tub80.ts/+(F)	718.333		;109605/+(F)	796.333		;109605/9-137G4;tub80.ts/+	911			;9-137G4/+;tub80.ts/+(F)	1076.5		;109605/+(F)	1178		;9-137G4/+;tub80.ts/+(F)	1196
;9-137G4/+;tub80.ts/+(F)	854		;109605/+(F)	714.667		;109605/9-137G4;tub80.ts/+	847			;9-137G4/+;tub80.ts/+(F)	713		;109605/+(F)	1045.5		;9-137G4/+;tub80.ts/+(F)	1121.5
;9-137G4/+;tub80.ts/+(F)	806.333		;109605/+(F)	848		;109605/9-137G4;tub80.ts/+	691.333			;9-137G4/+;tub80.ts/+(F)	1038.5		;109605/+(F)	948.5		;9-137G4/+;tub80.ts/+(F)	959
;9-137G4/+;tub80.ts/+(F)	798.667		;109605/+(F)	850.667		;109605/9-137G4;tub80.ts/+	729.333						;109605/+(F)	1140		;9-137G4/+;tub80.ts/+(F)	1167
			;109605/+(F)	843.333		;109605/9-137G4;tub80.ts/+	938.667						;109605/+(F)	1093		;9-137G4/+;tub80.ts/+(F)	1225
			;109605/+(F)	822.667		;109605/9-137G4;tub80.ts/+	778						;109605/+(F)	1008.5		;9-137G4/+;tub80.ts/+(F)	1155.5
			;109605/+(F)	737.667		;109605/9-137G4;tub80.ts/+	840						;109605/+(F)	1146		;9-137G4/+;tub80.ts/+(F)	985.5
			;109605/+(F)	834.333		;109605/9-137G4;tub80.ts/+	846						;109605/+(F)	1115		;9-137G4/+;tub80.ts/+(F)	1123.5
			;109605/+(F)	1016		;109605/9-137G4;tub80.ts/+	694.667						;109605/+(F)	1150		;9-137G4/+;tub80.ts/+(F)	922.5
			;109605/+(F)	886.333		;109605/9-137G4;tub80.ts/+	845						;109605/+(F)	1062.5		;9-137G4/+;tub80.ts/+(F)	1152
			;109605/+(F)	710.333		;109605/9-137G4;tub80.ts/+	683						;109605/+(F)	1106.5		;9-137G4/+;tub80.ts/+(F)	1039
			;109605/+(F)	1023.67									;109605/+(F)	1169
;9-137G4/+;tub80.ts/+(F)	1009		;13913/+(F)	694		;13913/9-137G4;tub80.ts/+	975			;9-137G4/+;tub80.ts/+(F)	725		;13913/+(F)	862		;13913/9-137G4;tub80.ts/+	1084
;9-137G4/+;tub80.ts/+(F)	906		;13913/+(F)	855		;13913/9-137G4;tub80.ts/+	929			;9-137G4/+;tub80.ts/+(F)	428		;13913/+(F)	912		;13913/9-137G4;tub80.ts/+	920
;9-137G4/+;tub80.ts/+(F)	973		;13913/+(F)	824		;13913/9-137G4;tub80.ts/+	603			;9-137G4/+;tub80.ts/+(F)	653		;13913/+(F)	988		;13913/9-137G4;tub80.ts/+	721
;9-137G4/+;tub80.ts/+(F)	902		;13913/+(F)	981		;13913/9-137G4;tub80.ts/+	960			;9-137G4/+;tub80.ts/+(F)	709		;13913/+(F)	693		;13913/9-137G4;tub80.ts/+	960
;9-137G4/+;tub80.ts/+(F)	1011		;13913/+(F)	857		;13913/9-137G4;tub80.ts/+	990			;9-137G4/+;tub80.ts/+(F)	772		;13913/+(F)	699		;13913/9-137G4;tub80.ts/+	915
;9-137G4/+;tub80.ts/+(F)	880		;13913/+(F)	904		;13913/9-137G4;tub80.ts/+	828			;9-137G4/+;tub80.ts/+(F)	585		;13913/+(F)	771		;13913/9-137G4;tub80.ts/+	720
;9-137G4/+;tub80.ts/+(F)	980		;13913/+(F)	1012		;13913/9-137G4;tub80.ts/+	920			;9-137G4/+;tub80.ts/+(F)	733		;13913/+(F)	919		;13913/9-137G4;tub80.ts/+	934
;9-137G4/+;tub80.ts/+(F)	914		;13913/+(F)	879		;13913/9-137G4;tub80.ts/+	625			;9-137G4/+;tub80.ts/+(F)	706		;13913/+(F)	845		;13913/9-137G4;tub80.ts/+	704
;9-137G4/+;tub80.ts/+(F)	753		;13913/+(F)	856		;13913/9-137G4;tub80.ts/+	740			;9-137G4/+;tub80.ts/+(F)	886		;13913/+(F)	853		;13913/9-137G4;tub80.ts/+	833
;9-137G4/+;tub80.ts/+(F)	958		;13913/+(F)	920		;13913/9-137G4;tub80.ts/+	587			;9-137G4/+;tub80.ts/+(F)	964		;13913/+(F)	871		;13913/9-137G4;tub80.ts/+	751
;9-137G4/+;tub80.ts/+(F)	712		;13913/+(F)	1070		;13913/9-137G4;tub80.ts/+	845			;9-137G4/+;tub80.ts/+(F)	721		;13913/+(F)	808		;13913/9-137G4;tub80.ts/+	739
;9-137G4/+;tub80.ts/+(F)	813		;13913/+(F)	772		;13913/9-137G4;tub80.ts/+	907			;9-137G4/+;tub80.ts/+(F)	762		;13913/+(F)	746		;13913/9-137G4;tub80.ts/+	840
;9-137G4/+;tub80.ts/+(F)	825		;13913/+(F)	740		;13913/9-137G4;tub80.ts/+	753			;9-137G4/+;tub80.ts/+(F)	895		;13913/+(F)	908		;13913/9-137G4;tub80.ts/+	801
;9-137G4/+;tub80.ts/+(F)	822		;13913/+(F)	692		;13913/9-137G4;tub80.ts/+	979			;9-137G4/+;tub80.ts/+(F)	887		;13913/+(F)	772		;13913/9-137G4;tub80.ts/+	922
;9-137G4/+;tub80.ts/+(F)	797		;13913/+(F)	839		;13913/9-137G4;tub80.ts/+	1049			;9-137G4/+;tub80.ts/+(F)	1024		;13913/+(F)	704		;13913/9-137G4;tub80.ts/+	997
;9-137G4/+;tub80.ts/+(F)	781		;13913/+(F)	750		;13913/9-137G4;tub80.ts/+	773			;9-137G4/+;tub80.ts/+(F)	909		;13913/+(F)	736		;13913/9-137G4;tub80.ts/+	879
;9-137G4/+;tub80.ts/+(F)	753		;13913/+(F)	628		;13913/9-137G4;tub80.ts/+	890			;9-137G4/+;tub80.ts/+(F)	979		;13913/+(F)	909		;13913/9-137G4;tub80.ts/+	1009
;9-137G4/+;tub80.ts/+(F)	770		;13913/+(F)	680		;13913/9-137G4;tub80.ts/+	888			;9-137G4/+;tub80.ts/+(F)	906		;13913/+(F)	821		;13913/9-137G4;tub80.ts/+	1020
;9-137G4/+;tub80.ts/+(F)	662		;13913/+(F)	731		;13913/9-137G4;tub80.ts/+	1082			;9-137G4/+;tub80.ts/+(F)	1063		;13913/+(F)	991		;13913/9-137G4;tub80.ts/+	1138
;9-137G4/+;tub80.ts/+(F)	939		;13913/+(F)	867		;13913/9-137G4;tub80.ts/+	861			;9-137G4/+;tub80.ts/+(F)	870		;13913/+(F)	780		;13913/9-137G4;tub80.ts/+	952
;9-137G4/+;tub80.ts/+(F)	828		;13913/+(F)	729		;13913/9-137G4;tub80.ts/+	802			;9-137G4/+;tub80.ts/+(F)	1045		;13913/+(F)	1058		;13913/9-137G4;tub80.ts/+	964
;9-137G4/+;tub80.ts/+(F)	946		;13913/+(F)	671		;13913/9-137G4;tub80.ts/+	793			;9-137G4/+;tub80.ts/+(F)	922		;13913/+(F)	858		;13913/9-137G4;tub80.ts/+	975
;9-137G4/+;tub80.ts/+(F)	783		;13913/+(F)	708		;13913/9-137G4;tub80.ts/+	987			;9-137G4/+;tub80.ts/+(F)	929		;13913/+(F)	964		;13913/9-137G4;tub80.ts/+	1047
;9-137G4/+;tub80.ts/+(F)	728		;13913/+(F)	726		;13913/9-137G4;tub80.ts/+	1070			;9-137G4/+;tub80.ts/+(F)	1015		;13913/+(F)	1051		;13913/9-137G4;tub80.ts/+	1035
;9-137G4/+;tub80.ts/+(F)	935.667		;13913/+(F)	847		;13913/9-137G4;tub80.ts/+	871			;9-137G4/+;tub80.ts/+(F)	1177		;13913/+(F)	1051		;13913/9-137G4;tub80.ts/+	977
;9-137G4/+;tub80.ts/+(F)	864.333		;13913/+(F)	729		;13913/9-137G4;tub80.ts/+	835			;9-137G4/+;tub80.ts/+(F)	1140.5		;13913/+(F)	1011		;13913/9-137G4;tub80.ts/+	1097
;9-137G4/+;tub80.ts/+(F)	827		;13913/+(F)	701		;13913/9-137G4;tub80.ts/+	783			;9-137G4/+;tub80.ts/+(F)	883		;13913/+(F)	1034		;13913/9-137G4;tub80.ts/+	934
;9-137G4/+;tub80.ts/+(F)	650.333		;13913/+(F)	749		;13913/9-137G4;tub80.ts/+	905			;9-137G4/+;tub80.ts/+(F)	996		;13913/+(F)	960		;13913/9-137G4;tub80.ts/+	889
;9-137G4/+;tub80.ts/+(F)	790.333		;13913/+(F)	813		;13913/9-137G4;tub80.ts/+	878			;9-137G4/+;tub80.ts/+(F)	889		;13913/+(F)	822		;13913/9-137G4;tub80.ts/+	944
;9-137G4/+;tub80.ts/+(F)	567.333		;13913/+(F)	805		;13913/9-137G4;tub80.ts/+	873			;9-137G4/+;tub80.ts/+(F)	1041		;13913/+(F)	853		;13913/9-137G4;tub80.ts/+	953
;9-137G4/+;tub80.ts/+(F)	806.667		;13913/+(F)	866		;13913/9-137G4;tub80.ts/+	822			;9-137G4/+;tub80.ts/+(F)	1191		;13913/+(F)	922		;13913/9-137G4;tub80.ts/+	762
;9-137G4/+;tub80.ts/+(F)	1108.67		;13913/+(F)	793		;13913/9-137G4;tub80.ts/+	868			;9-137G4/+;tub80.ts/+(F)	1001		;13913/+(F)	882		;13913/9-137G4;tub80.ts/+	996
;9-137G4/+;tub80.ts/+(F)	925.667		;13913/+(F)	908		;13913/9-137G4;tub80.ts/+	616.333			;9-137G4/+;tub80.ts/+(F)	1121		;13913/+(F)	1052.5		;13913/9-137G4;tub80.ts/+	972.5
;9-137G4/+;tub80.ts/+(F)	854.667		;13913/+(F)	811.667		;13913/9-137G4;tub80.ts/+	820.667			;9-137G4/+;tub80.ts/+(F)	926.5		;13913/+(F)	1020		;13913/9-137G4;tub80.ts/+	966.5
;9-137G4/+;tub80.ts/+(F)	806.667		;13913/+(F)	650.333		;13913/9-137G4;tub80.ts/+	677			;9-137G4/+;tub80.ts/+(F)	913.5		;13913/+(F)	825		;13913/9-137G4;tub80.ts/+	959.5
;9-137G4/+;tub80.ts/+(F)	623		;13913/+(F)	763.333		;13913/9-137G4;tub80.ts/+	837			;9-137G4/+;tub80.ts/+(F)	1087		;13913/+(F)	998.5		;13913/9-137G4;tub80.ts/+	1181.5
;9-137G4/+;tub80.ts/+(F)	718.333		;13913/+(F)	737.667		;13913/9-137G4;tub80.ts/+	1054.67			;9-137G4/+;tub80.ts/+(F)	1076.5		;13913/+(F)	994.5		;13913/9-137G4;tub80.ts/+	934
;9-137G4/+;tub80.ts/+(F)	854		;13913/+(F)	909.667		;13913/9-137G4;tub80.ts/+	832			;9-137G4/+;tub80.ts/+(F)	713		;13913/+(F)	1146		;13913/9-137G4;tub80.ts/+	1022
;9-137G4/+;tub80.ts/+(F)	806.333		;13913/+(F)	877.333		;13913/9-137G4;tub80.ts/+	590.333			;9-137G4/+;tub80.ts/+(F)	1038.5		;13913/+(F)	1191		;13913/9-137G4;tub80.ts/+	1145.5
;9-137G4/+;tub80.ts/+(F)	798.667		;13913/+(F)	493.667		;13913/9-137G4;tub80.ts/+	741						;13913/+(F)	750.5		;13913/9-137G4;tub80.ts/+	976.5
			;13913/+(F)	599		;13913/9-137G4;tub80.ts/+	833.333						;13913/+(F)	773.5		;13913/9-137G4;tub80.ts/+	1290.5
			;13913/+(F)	647.333		;13913/9-137G4;tub80.ts/+	578.667						;13913/+(F)	922.5		;13913/9-137G4;tub80.ts/+	1178.5
			;13913/+(F)	608.667		;13913/9-137G4;tub80.ts/+	990.333						;13913/+(F)	1133		;13913/9-137G4;tub80.ts/+	1118
			;13913/+(F)	717.667		;13913/9-137G4;tub80.ts/+	783.667						;13913/+(F)	908.5		;13913/9-137G4;tub80.ts/+	1181
			;13913/+(F)	781.667		;13913/9-137G4;tub80.ts/+	989.333						;13913/+(F)	950		;13913/9-137G4;tub80.ts/+	928
			;13913/+(F)	652.667		;13913/9-137G4;tub80.ts/+	724.667						;13913/+(F)	733.5		;13913/9-137G4;tub80.ts/+	859.5
			;13913/+(F)	688.333		;13913/9-137G4;tub80.ts/+	887.667						;13913/+(F)	847
			;13913/+(F)	671.333		;13913/9-137G4;tub80.ts/+	759						;13913/+(F)	728.5
;9-137G4/+;tub80.ts/+(F)	1009		;3710/+; (F)	838		;3710/9-137G4;tub80.ts/+	811			;9-137G4/+;tub80.ts/+(F)	725		;3710/+; (F)	688		;3710/9-137G4;tub80.ts/+	977
;9-137G4/+;tub80.ts/+(F)	906		;3710/+; (F)	744		;3710/9-137G4;tub80.ts/+	903			;9-137G4/+;tub80.ts/+(F)	428		;3710/+; (F)	970		;3710/9-137G4;tub80.ts/+	965
;9-137G4/+;tub80.ts/+(F)	973		;3710/+; (F)	855		;3710/9-137G4;tub80.ts/+	775			;9-137G4/+;tub80.ts/+(F)	653		;3710/+; (F)	968		;3710/9-137G4;tub80.ts/+	862
;9-137G4/+;tub80.ts/+(F)	902		;3710/+; (F)	691		;3710/9-137G4;tub80.ts/+	927			;9-137G4/+;tub80.ts/+(F)	709		;3710/+; (F)	858		;3710/9-137G4;tub80.ts/+	983
;9-137G4/+;tub80.ts/+(F)	1011		;3710/+; (F)	643		;3710/9-137G4;tub80.ts/+	864			;9-137G4/+;tub80.ts/+(F)	772		;3710/+; (F)	716		;3710/9-137G4;tub80.ts/+	993
;9-137G4/+;tub80.ts/+(F)	880		;3710/+; (F)	695		;3710/9-137G4;tub80.ts/+	862			;9-137G4/+;tub80.ts/+(F)	585		;3710/+; (F)	920		;3710/9-137G4;tub80.ts/+	809
;9-137G4/+;tub80.ts/+(F)	980		;3710/+; (F)	785		;3710/9-137G4;tub80.ts/+	985			;9-137G4/+;tub80.ts/+(F)	733		;3710/+; (F)	844		;3710/9-137G4;tub80.ts/+	888
;9-137G4/+;tub80.ts/+(F)	914		;3710/+; (F)	892		;3710/9-137G4;tub80.ts/+	933			;9-137G4/+;tub80.ts/+(F)	706		;3710/+; (F)	1048		;3710/9-137G4;tub80.ts/+	922
;9-137G4/+;tub80.ts/+(F)	753		;3710/+; (F)	682		;3710/9-137G4;tub80.ts/+	658			;9-137G4/+;tub80.ts/+(F)	886		;3710/+; (F)	748		;3710/9-137G4;tub80.ts/+	738
;9-137G4/+;tub80.ts/+(F)	958		;3710/+; (F)	641		;3710/9-137G4;tub80.ts/+	976			;9-137G4/+;tub80.ts/+(F)	964		;3710/+; (F)	641		;3710/9-137G4;tub80.ts/+	1047
;9-137G4/+;tub80.ts/+(F)	712		;3710/+; (F)	905		;3710/9-137G4;tub80.ts/+	889			;9-137G4/+;tub80.ts/+(F)	721		;3710/+; (F)	870		;3710/9-137G4;tub80.ts/+	936
;9-137G4/+;tub80.ts/+(F)	813		;3710/+; (F)	835		;3710/9-137G4;tub80.ts/+	964			;9-137G4/+;tub80.ts/+(F)	762		;3710/+; (F)	851		;3710/9-137G4;tub80.ts/+	968
;9-137G4/+;tub80.ts/+(F)	825		;3710/+; (F)	577		;3710/9-137G4;tub80.ts/+	732			;9-137G4/+;tub80.ts/+(F)	895		;3710/+; (F)	767		;3710/9-137G4;tub80.ts/+	710
;9-137G4/+;tub80.ts/+(F)	822		;3710/+; (F)	1056		;3710/9-137G4;tub80.ts/+	923			;9-137G4/+;tub80.ts/+(F)	887		;3710/+; (F)	1009		;3710/9-137G4;tub80.ts/+	894
;9-137G4/+;tub80.ts/+(F)	797		;3710/+; (F)	776		;3710/9-137G4;tub80.ts/+	825			;9-137G4/+;tub80.ts/+(F)	1024		;3710/+; (F)	966		;3710/9-137G4;tub80.ts/+	921
;9-137G4/+;tub80.ts/+(F)	781		;3710/+; (F)	414		;3710/9-137G4;tub80.ts/+	824			;9-137G4/+;tub80.ts/+(F)	909		;3710/+; (F)	856		;3710/9-137G4;tub80.ts/+	985
;9-137G4/+;tub80.ts/+(F)	753		;3710/+; (F)	798		;3710/9-137G4;tub80.ts/+	728			;9-137G4/+;tub80.ts/+(F)	979		;3710/+; (F)	977		;3710/9-137G4;tub80.ts/+	1033
;9-137G4/+;tub80.ts/+(F)	770		;3710/+; (F)	912		;3710/9-137G4;tub80.ts/+	687			;9-137G4/+;tub80.ts/+(F)	906		;3710/+; (F)	1005		;3710/9-137G4;tub80.ts/+	987
;9-137G4/+;tub80.ts/+(F)	662		;3710/+; (F)	895		;3710/9-137G4;tub80.ts/+	835			;9-137G4/+;tub80.ts/+(F)	1063		;3710/+; (F)	1094		;3710/9-137G4;tub80.ts/+	887
;9-137G4/+;tub80.ts/+(F)	939		;3710/+; (F)	927		;3710/9-137G4;tub80.ts/+	899			;9-137G4/+;tub80.ts/+(F)	870		;3710/+; (F)	949		;3710/9-137G4;tub80.ts/+	961
;9-137G4/+;tub80.ts/+(F)	828		;3710/+; (F)	811		;3710/9-137G4;tub80.ts/+	759			;9-137G4/+;tub80.ts/+(F)	1045		;3710/+; (F)	1117		;3710/9-137G4;tub80.ts/+	991
;9-137G4/+;tub80.ts/+(F)	946		;3710/+; (F)	861		;3710/9-137G4;tub80.ts/+	681			;9-137G4/+;tub80.ts/+(F)	922		;3710/+; (F)	864		;3710/9-137G4;tub80.ts/+	970
;9-137G4/+;tub80.ts/+(F)	783		;3710/+; (F)	761		;3710/9-137G4;tub80.ts/+	756			;9-137G4/+;tub80.ts/+(F)	929		;3710/+; (F)	841		;3710/9-137G4;tub80.ts/+	953
;9-137G4/+;tub80.ts/+(F)	728		;3710/+; (F)	639		;3710/9-137G4;tub80.ts/+	756			;9-137G4/+;tub80.ts/+(F)	1015		;3710/+; (F)	1171		;3710/9-137G4;tub80.ts/+	1121
;9-137G4/+;tub80.ts/+(F)	935.667		;3710/+; (F)	809		;3710/9-137G4;tub80.ts/+	591			;9-137G4/+;tub80.ts/+(F)	1177		;3710/+; (F)	1057		;3710/9-137G4;tub80.ts/+	750
;9-137G4/+;tub80.ts/+(F)	864.333		;3710/+; (F)	762		;3710/9-137G4;tub80.ts/+	939			;9-137G4/+;tub80.ts/+(F)	1140.5		;3710/+; (F)	946		;3710/9-137G4;tub80.ts/+	975
;9-137G4/+;tub80.ts/+(F)	827		;3710/+; (F)	711		;3710/9-137G4;tub80.ts/+	963			;9-137G4/+;tub80.ts/+(F)	883		;3710/+; (F)	1075		;3710/9-137G4;tub80.ts/+	975
;9-137G4/+;tub80.ts/+(F)	650.333		;3710/+; (F)	723		;3710/9-137G4;tub80.ts/+	587			;9-137G4/+;tub80.ts/+(F)	996		;3710/+; (F)	919		;3710/9-137G4;tub80.ts/+	818
;9-137G4/+;tub80.ts/+(F)	790.333		;3710/+; (F)	722		;3710/9-137G4;tub80.ts/+	601			;9-137G4/+;tub80.ts/+(F)	889		;3710/+; (F)	1050		;3710/9-137G4;tub80.ts/+	836
;9-137G4/+;tub80.ts/+(F)	567.333		;3710/+; (F)	659		;3710/9-137G4;tub80.ts/+	716			;9-137G4/+;tub80.ts/+(F)	1041		;3710/+; (F)	1210		;3710/9-137G4;tub80.ts/+	903
;9-137G4/+;tub80.ts/+(F)	806.667		;3710/+; (F)	970		;3710/9-137G4;tub80.ts/+	672			;9-137G4/+;tub80.ts/+(F)	1191		;3710/+; (F)	1175		;3710/9-137G4;tub80.ts/+	920
;9-137G4/+;tub80.ts/+(F)	1108.67		;3710/+; (F)	1074		;3710/9-137G4;tub80.ts/+	810			;9-137G4/+;tub80.ts/+(F)	1001		;3710/+; (F)	1051		;3710/9-137G4;tub80.ts/+	927
;9-137G4/+;tub80.ts/+(F)	925.667		;3710/+; (F)	862		;3710/9-137G4;tub80.ts/+	1107.67			;9-137G4/+;tub80.ts/+(F)	1121		;3710/+; (F)	978.5		;3710/9-137G4;tub80.ts/+	1195
;9-137G4/+;tub80.ts/+(F)	854.667		;3710/+; (F)	772.333		;3710/9-137G4;tub80.ts/+	1072			;9-137G4/+;tub80.ts/+(F)	926.5		;3710/+; (F)	680.5		;3710/9-137G4;tub80.ts/+	1049.5
;9-137G4/+;tub80.ts/+(F)	806.667		;3710/+; (F)	598.333		;3710/9-137G4;tub80.ts/+	762			;9-137G4/+;tub80.ts/+(F)	913.5		;3710/+; (F)	1011.5		;3710/9-137G4;tub80.ts/+	827
;9-137G4/+;tub80.ts/+(F)	623		;3710/+; (F)	851.667		;3710/9-137G4;tub80.ts/+	870.667			;9-137G4/+;tub80.ts/+(F)	1087		;3710/+; (F)	1184.5		;3710/9-137G4;tub80.ts/+	1039
;9-137G4/+;tub80.ts/+(F)	718.333		;3710/+; (F)	1018.67		;3710/9-137G4;tub80.ts/+	937.333			;9-137G4/+;tub80.ts/+(F)	1076.5		;3710/+; (F)	1023.5		;3710/9-137G4;tub80.ts/+	1158.5
;9-137G4/+;tub80.ts/+(F)	854		;3710/+; (F)	929.333		;3710/9-137G4;tub80.ts/+	763.333			;9-137G4/+;tub80.ts/+(F)	713		;3710/+; (F)	1069		;3710/9-137G4;tub80.ts/+	988.5
;9-137G4/+;tub80.ts/+(F)	806.333		;3710/+; (F)	1026.67		;3710/9-137G4;tub80.ts/+	752.333			;9-137G4/+;tub80.ts/+(F)	1038.5		;3710/+; (F)	776		;3710/9-137G4;tub80.ts/+	1139.5
;9-137G4/+;tub80.ts/+(F)	798.667		;3710/+; (F)	697		;3710/9-137G4;tub80.ts/+	763.667						;3710/+; (F)	1052		;3710/9-137G4;tub80.ts/+	1149
			;3710/+; (F)	802.333		;3710/9-137G4;tub80.ts/+	744						;3710/+; (F)	892		;3710/9-137G4;tub80.ts/+	1061
			;3710/+; (F)	673		;3710/9-137G4;tub80.ts/+	970.333						;3710/+; (F)	1005.5		;3710/9-137G4;tub80.ts/+	1102
			;3710/+; (F)	721.333		;3710/9-137G4;tub80.ts/+	898						;3710/+; (F)	1044.5		;3710/9-137G4;tub80.ts/+	1196
			;3710/+; (F)	834		;3710/9-137G4;tub80.ts/+	554						;3710/+; (F)	1009.5		;3710/9-137G4;tub80.ts/+	849
			;3710/+; (F)	725.667		;3710/9-137G4;tub80.ts/+	758.333						;3710/+; (F)	1089		;3710/9-137G4;tub80.ts/+	1085
			;3710/+; (F)	924.333		;3710/9-137G4;tub80.ts/+	707						;3710/+; (F)	890		;3710/9-137G4;tub80.ts/+	828.5
			;3710/+; (F)	795.333		;3710/9-137G4;tub80.ts/+	855.667						;3710/+; (F)	943		;3710/9-137G4;tub80.ts/+	981
			;3710/+; (F)	845		;3710/9-137G4;tub80.ts/+	834									;3710/9-137G4;tub80.ts/+	1061.5
;9-137G4/+;tub80.ts/+(F)	848.667		;;31151/+(F)	879.667		;9-137G4/+;31151/tub80.ts	860			;9-137G4/+;tub80.ts/+(F)	775		;;31151/+	736		;9-137G4/+;31151/tub80.ts	927
;9-137G4/+;tub80.ts/+(F)	653.667		;;31151/+(F)	795.667		;9-137G4/+;31151/tub80.ts	666.333			;9-137G4/+;tub80.ts/+(F)	250		;;31151/+	829.5		;9-137G4/+;31151/tub80.ts	736.5
;9-137G4/+;tub80.ts/+(F)	572.667		;;31151/+(F)	984		;9-137G4/+;31151/tub80.ts	765			;9-137G4/+;tub80.ts/+(F)	462		;;31151/+	976		;9-137G4/+;31151/tub80.ts	892
;9-137G4/+;tub80.ts/+(F)	677		;;31151/+(F)	792.667		;9-137G4/+;31151/tub80.ts	885			;9-137G4/+;tub80.ts/+(F)	683		;;31151/+	771.5		;9-137G4/+;31151/tub80.ts	808
;9-137G4/+;tub80.ts/+(F)	788.333		;;31151/+(F)	575.333		;9-137G4/+;31151/tub80.ts	926			;9-137G4/+;tub80.ts/+(F)	416.5		;;31151/+	529		;9-137G4/+;31151/tub80.ts	905.5
;9-137G4/+;tub80.ts/+(F)	763		;;31151/+(F)	858.667		;9-137G4/+;31151/tub80.ts	728			;9-137G4/+;tub80.ts/+(F)	364.5		;;31151/+	738.5		;9-137G4/+;31151/tub80.ts	842.5
;9-137G4/+;tub80.ts/+(F)	579.333		;;31151/+(F)	798.333		;9-137G4/+;31151/tub80.ts	721			;9-137G4/+;tub80.ts/+(F)	327.5		;;31151/+	785.5		;9-137G4/+;31151/tub80.ts	739
;9-137G4/+;tub80.ts/+(F)	361.667		;;31151/+(F)	939		;9-137G4/+;31151/tub80.ts	721			;9-137G4/+;tub80.ts/+(F)	187		;;31151/+	790.5		;9-137G4/+;31151/tub80.ts	565.5
;9-137G4/+;tub80.ts/+(F)	460.333		;;31151/+(F)	818		;9-137G4/+;31151/tub80.ts	780.667			;9-137G4/+;tub80.ts/+(F)	415.5		;;31151/+	866		;9-137G4/+;31151/tub80.ts	781
;9-137G4/+;tub80.ts/+(F)	519.667		;;31151/+(F)	764.333		;9-137G4/+;31151/tub80.ts	780.667			;9-137G4/+;tub80.ts/+(F)	291.5		;;31151/+	683.5		;9-137G4/+;31151/tub80.ts	599
;9-137G4/+;tub80.ts/+(F)	570.667		;;31151/+(F)	762		;9-137G4/+;31151/tub80.ts	922.333			;9-137G4/+;tub80.ts/+(F)	737.5		;;31151/+	884.5		;9-137G4/+;31151/tub80.ts	820.5
;9-137G4/+;tub80.ts/+(F)	777.667		;;31151/+(F)	924		;9-137G4/+;31151/tub80.ts	879.333			;9-137G4/+;tub80.ts/+(F)	559.5		;;31151/+	690.5		;9-137G4/+;31151/tub80.ts	975
;9-137G4/+;tub80.ts/+(F)	910.667		;;31151/+(F)	901.667		;9-137G4/+;31151/tub80.ts	816			;9-137G4/+;tub80.ts/+(F)	548		;;31151/+	761.5		;9-137G4/+;31151/tub80.ts	608
;9-137G4/+;tub80.ts/+(F)	937.667		;;31151/+(F)	758.333		;9-137G4/+;31151/tub80.ts	733.333			;9-137G4/+;tub80.ts/+(F)	775.5		;;31151/+	626		;9-137G4/+;31151/tub80.ts	872
;9-137G4/+;tub80.ts/+(F)	803.333		;;31151/+(F)	750		;9-137G4/+;31151/tub80.ts	963.667			;9-137G4/+;tub80.ts/+(F)	616		;;31151/+	919.5		;9-137G4/+;31151/tub80.ts	632.5
;9-137G4/+;tub80.ts/+(F)	669		;;31151/+(F)	955		;9-137G4/+;31151/tub80.ts	627.667			;9-137G4/+;tub80.ts/+(F)	324.5		;;31151/+	921.5		;9-137G4/+;31151/tub80.ts	741
;9-137G4/+;tub80.ts/+(F)	731		;;31151/+(F)	602.667		;9-137G4/+;31151/tub80.ts	804			;9-137G4/+;tub80.ts/+(F)	547		;;31151/+	537.5		;9-137G4/+;31151/tub80.ts	608
;9-137G4/+;tub80.ts/+(F)	698		;;31151/+(F)	941.333		;9-137G4/+;31151/tub80.ts	704.333			;9-137G4/+;tub80.ts/+(F)	626		;;31151/+	811		;9-137G4/+;31151/tub80.ts	596.5
;9-137G4/+;tub80.ts/+(F)	721.667		;;31151/+(F)	747.667		;9-137G4/+;31151/tub80.ts	875.333			;9-137G4/+;tub80.ts/+(F)	384		;;31151/+	750.5		;9-137G4/+;31151/tub80.ts	781.5
;9-137G4/+;tub80.ts/+(F)	697.333		;;31151/+(F)	843.667		;9-137G4/+;31151/tub80.ts	831.333			;9-137G4/+;tub80.ts/+(F)	541		;;31151/+	873		;9-137G4/+;31151/tub80.ts	820.5
;9-137G4/+;tub80.ts/+(F)	903.333		;;31151/+(F)	591		;9-137G4/+;31151/tub80.ts	647			;9-137G4/+;tub80.ts/+(F)	764		;;31151/+	742		;9-137G4/+;31151/tub80.ts	647
;9-137G4/+;tub80.ts/+(F)	824		;;31151/+(F)	667.333		;9-137G4/+;31151/tub80.ts	837.333			;9-137G4/+;tub80.ts/+(F)	512		;;31151/+	640.5		;9-137G4/+;31151/tub80.ts	864.5
;9-137G4/+;tub80.ts/+(F)	879		;;31151/+(F)	644.667		;9-137G4/+;31151/tub80.ts	749.333			;9-137G4/+;tub80.ts/+(F)	715.5		;;31151/+	772.5		;9-137G4/+;31151/tub80.ts	598.5
;9-137G4/+;tub80.ts/+(F)	799.333		;;31151/+(F)	741		;9-137G4/+;31151/tub80.ts	678.667			;9-137G4/+;tub80.ts/+(F)	559		;;31151/+	880		;9-137G4/+;31151/tub80.ts	364.5
;9-137G4/+;tub80.ts/+(F)	788		;;31151/+(F)	799.667		;9-137G4/+;31151/tub80.ts	805.667			;9-137G4/+;tub80.ts/+(F)	622.5		;;31151/+	886		;9-137G4/+;31151/tub80.ts	904
;9-137G4/+;tub80.ts/+(F)	593		;;31151/+(F)	655.667		;9-137G4/+;31151/tub80.ts	480.667			;9-137G4/+;tub80.ts/+(F)	152		;;31151/+	642.5		;9-137G4/+;31151/tub80.ts	569.5
;9-137G4/+;tub80.ts/+(F)	723.333		;;31151/+(F)	680		;9-137G4/+;31151/tub80.ts	906			;9-137G4/+;tub80.ts/+(F)	420.5		;;31151/+	399.5		;9-137G4/+;31151/tub80.ts	763.5
;9-137G4/+;tub80.ts/+(F)	524.667		;;31151/+(F)	806		;9-137G4/+;31151/tub80.ts	951			;9-137G4/+;tub80.ts/+(F)	257.5		;;31151/+	874.5		;9-137G4/+;31151/tub80.ts	882
;9-137G4/+;tub80.ts/+(F)	962.667		;;31151/+(F)	680.667		;9-137G4/+;31151/tub80.ts	788.667			;9-137G4/+;tub80.ts/+(F)	840.5		;;31151/+	643.5		;9-137G4/+;31151/tub80.ts	935.5
;9-137G4/+;tub80.ts/+(F)	697.333		;;31151/+(F)	567.667		;9-137G4/+;31151/tub80.ts	710.667			;9-137G4/+;tub80.ts/+(F)	612.5		;;31151/+	866		;9-137G4/+;31151/tub80.ts	796
;9-137G4/+;tub80.ts/+(F)	882		;;31151/+(F)	975.667		;9-137G4/+;31151/tub80.ts	831			;9-137G4/+;tub80.ts/+(F)	644.5		;;31151/+	805.5		;9-137G4/+;31151/tub80.ts	505.5
;9-137G4/+;tub80.ts/+(F)	882		;;31151/+(F)	871		;9-137G4/+;31151/tub80.ts	904.667			;9-137G4/+;tub80.ts/+(F)	600		;;31151/+	848		;9-137G4/+;31151/tub80.ts	669
