# Supplementary material for: Modulation of sleep by trafficking of lipids through the Drosophila blood-brain barrier
Source: eLife. 2023 May 4;12:e86336. doi: 10.7554/eLife.86336 (PMC10205086; doi:10.7554/eLife.86336)
Supplement: Figure 3—figure supplement 6—source data 1. [file elife-86336-fig3-figsupp6-data1.xlsx]

## Sheet: Sheet1
18 degree										31 degree
GAL4 tub80 ts Control	Total sleep		UAS Control	Total sleep		GAL4 tub80 ts x UAS	Total sleep			GAL4 tub80 ts Control	Total sleep		UAS Control	Total sleep		GAL4 tub80 ts x UAS	Total sleep
;9-137G4/+;tub80.ts/+(F)	1009		;105387/+; (F)	795		;105387/9-137G4;tub80.ts/+	934			;9-137G4/+;tub80.ts/+(F)	725		;105387/+; (F)	875		;105387/9-137G4;tub80.ts/+	1095
;9-137G4/+;tub80.ts/+(F)	906		;105387/+; (F)	1070		;105387/9-137G4;tub80.ts/+	1065			;9-137G4/+;tub80.ts/+(F)	428		;105387/+; (F)	1006		;105387/9-137G4;tub80.ts/+	1066
;9-137G4/+;tub80.ts/+(F)	973		;105387/+; (F)	875		;105387/9-137G4;tub80.ts/+	1039			;9-137G4/+;tub80.ts/+(F)	653		;105387/+; (F)	925		;105387/9-137G4;tub80.ts/+	1093
;9-137G4/+;tub80.ts/+(F)	902		;105387/+; (F)	864		;105387/9-137G4;tub80.ts/+	718			;9-137G4/+;tub80.ts/+(F)	709		;105387/+; (F)	1050		;105387/9-137G4;tub80.ts/+	979
;9-137G4/+;tub80.ts/+(F)	1011		;105387/+; (F)	787		;105387/9-137G4;tub80.ts/+	973			;9-137G4/+;tub80.ts/+(F)	772		;105387/+; (F)	935		;105387/9-137G4;tub80.ts/+	1105
;9-137G4/+;tub80.ts/+(F)	880		;105387/+; (F)	825		;105387/9-137G4;tub80.ts/+	856			;9-137G4/+;tub80.ts/+(F)	585		;105387/+; (F)	799		;105387/9-137G4;tub80.ts/+	1015
;9-137G4/+;tub80.ts/+(F)	980		;105387/+; (F)	713		;105387/9-137G4;tub80.ts/+	759			;9-137G4/+;tub80.ts/+(F)	733		;105387/+; (F)	581		;105387/9-137G4;tub80.ts/+	889
;9-137G4/+;tub80.ts/+(F)	914		;105387/+; (F)	1047		;105387/9-137G4;tub80.ts/+	1000			;9-137G4/+;tub80.ts/+(F)	706		;105387/+; (F)	1139		;105387/9-137G4;tub80.ts/+	1125
;9-137G4/+;tub80.ts/+(F)	753		;105387/+; (F)	950		;105387/9-137G4;tub80.ts/+	693			;9-137G4/+;tub80.ts/+(F)	886		;105387/+; (F)	879		;105387/9-137G4;tub80.ts/+	780
;9-137G4/+;tub80.ts/+(F)	958		;105387/+; (F)	975		;105387/9-137G4;tub80.ts/+	741			;9-137G4/+;tub80.ts/+(F)	964		;105387/+; (F)	1196		;105387/9-137G4;tub80.ts/+	861
;9-137G4/+;tub80.ts/+(F)	712		;105387/+; (F)	955		;105387/9-137G4;tub80.ts/+	943			;9-137G4/+;tub80.ts/+(F)	721		;105387/+; (F)	990		;105387/9-137G4;tub80.ts/+	1020
;9-137G4/+;tub80.ts/+(F)	813		;105387/+; (F)	902		;105387/9-137G4;tub80.ts/+	1006			;9-137G4/+;tub80.ts/+(F)	762		;105387/+; (F)	1022		;105387/9-137G4;tub80.ts/+	1069
;9-137G4/+;tub80.ts/+(F)	825		;105387/+; (F)	1033		;105387/9-137G4;tub80.ts/+	1102			;9-137G4/+;tub80.ts/+(F)	895		;105387/+; (F)	1022		;105387/9-137G4;tub80.ts/+	966
;9-137G4/+;tub80.ts/+(F)	822		;105387/+; (F)	841		;105387/9-137G4;tub80.ts/+	896			;9-137G4/+;tub80.ts/+(F)	887		;105387/+; (F)	1023		;105387/9-137G4;tub80.ts/+	1101
;9-137G4/+;tub80.ts/+(F)	797		;105387/+; (F)	958		;105387/9-137G4;tub80.ts/+	835			;9-137G4/+;tub80.ts/+(F)	1024		;105387/+; (F)	945		;105387/9-137G4;tub80.ts/+	874
;9-137G4/+;tub80.ts/+(F)	781		;105387/+; (F)	840		;105387/9-137G4;tub80.ts/+	880			;9-137G4/+;tub80.ts/+(F)	909		;105387/+; (F)	871		;105387/9-137G4;tub80.ts/+	1041
;9-137G4/+;tub80.ts/+(F)	753		;105387/+; (F)	830		;105387/9-137G4;tub80.ts/+	1173			;9-137G4/+;tub80.ts/+(F)	979		;105387/+; (F)	998		;105387/9-137G4;tub80.ts/+	1067
;9-137G4/+;tub80.ts/+(F)	770		;105387/+; (F)	974		;105387/9-137G4;tub80.ts/+	1138			;9-137G4/+;tub80.ts/+(F)	906		;105387/+; (F)	1141		;105387/9-137G4;tub80.ts/+	1119
;9-137G4/+;tub80.ts/+(F)	662		;105387/+; (F)	912		;105387/9-137G4;tub80.ts/+	974			;9-137G4/+;tub80.ts/+(F)	1063		;105387/+; (F)	912		;105387/9-137G4;tub80.ts/+	1170
;9-137G4/+;tub80.ts/+(F)	939		;105387/+; (F)	1074		;105387/9-137G4;tub80.ts/+	965			;9-137G4/+;tub80.ts/+(F)	870		;105387/+; (F)	1220		;105387/9-137G4;tub80.ts/+	1082
;9-137G4/+;tub80.ts/+(F)	828		;105387/+; (F)	915		;105387/9-137G4;tub80.ts/+	1023			;9-137G4/+;tub80.ts/+(F)	1045		;105387/+; (F)	982		;105387/9-137G4;tub80.ts/+	1215
;9-137G4/+;tub80.ts/+(F)	946		;105387/+; (F)	866		;105387/9-137G4;tub80.ts/+	1225			;9-137G4/+;tub80.ts/+(F)	922		;105387/+; (F)	964		;105387/9-137G4;tub80.ts/+	1224
;9-137G4/+;tub80.ts/+(F)	783		;105387/+; (F)	890		;105387/9-137G4;tub80.ts/+	1036			;9-137G4/+;tub80.ts/+(F)	929		;105387/+; (F)	1009		;105387/9-137G4;tub80.ts/+	1118
;9-137G4/+;tub80.ts/+(F)	728		;105387/+; (F)	875		;105387/9-137G4;tub80.ts/+	1076			;9-137G4/+;tub80.ts/+(F)	1015		;105387/+; (F)	944		;105387/9-137G4;tub80.ts/+	1202
;9-137G4/+;tub80.ts/+(F)	935.667		;105387/+; (F)	775		;105387/9-137G4;tub80.ts/+	1124			;9-137G4/+;tub80.ts/+(F)	1177		;105387/+; (F)	1051		;105387/9-137G4;tub80.ts/+	1156
;9-137G4/+;tub80.ts/+(F)	864.333		;105387/+; (F)	863		;105387/9-137G4;tub80.ts/+	1076			;9-137G4/+;tub80.ts/+(F)	1140.5		;105387/+; (F)	1065		;105387/9-137G4;tub80.ts/+	1144
;9-137G4/+;tub80.ts/+(F)	827		;105387/+; (F)	897		;105387/9-137G4;tub80.ts/+	1290			;9-137G4/+;tub80.ts/+(F)	883		;105387/+; (F)	1005		;105387/9-137G4;tub80.ts/+	1333
;9-137G4/+;tub80.ts/+(F)	650.333		;105387/+; (F)	1031		;105387/9-137G4;tub80.ts/+	1149			;9-137G4/+;tub80.ts/+(F)	996		;105387/+; (F)	1101		;105387/9-137G4;tub80.ts/+	1279
;9-137G4/+;tub80.ts/+(F)	790.333		;105387/+; (F)	993		;105387/9-137G4;tub80.ts/+	1034			;9-137G4/+;tub80.ts/+(F)	889		;105387/+; (F)	1053		;105387/9-137G4;tub80.ts/+	1178
;9-137G4/+;tub80.ts/+(F)	567.333		;105387/+; (F)	890		;105387/9-137G4;tub80.ts/+	1231			;9-137G4/+;tub80.ts/+(F)	1041		;105387/+; (F)	1113		;105387/9-137G4;tub80.ts/+	1178
;9-137G4/+;tub80.ts/+(F)	806.667		;105387/+; (F)	891		;105387/9-137G4;tub80.ts/+	831			;9-137G4/+;tub80.ts/+(F)	1191		;105387/+; (F)	1043		;105387/9-137G4;tub80.ts/+	1068
;9-137G4/+;tub80.ts/+(F)	1108.67		;105387/+; (F)	944		;105387/9-137G4;tub80.ts/+	1012			;9-137G4/+;tub80.ts/+(F)	1001		;105387/+; (F)	880		;105387/9-137G4;tub80.ts/+	1172
;9-137G4/+;tub80.ts/+(F)	925.667		;105387/+; (F)	831.333		;105387/9-137G4;tub80.ts/+	1055.67			;9-137G4/+;tub80.ts/+(F)	1121		;105387/+; (F)	1071.5		;105387/9-137G4;tub80.ts/+	1179
;9-137G4/+;tub80.ts/+(F)	854.667		;105387/+; (F)	891.667		;105387/9-137G4;tub80.ts/+	887			;9-137G4/+;tub80.ts/+(F)	926.5		;105387/+; (F)	1234.5		;105387/9-137G4;tub80.ts/+	1085
;9-137G4/+;tub80.ts/+(F)	806.667		;105387/+; (F)	829.333		;105387/9-137G4;tub80.ts/+	1007.33			;9-137G4/+;tub80.ts/+(F)	913.5		;105387/+; (F)	1094		;105387/9-137G4;tub80.ts/+	1095.5
;9-137G4/+;tub80.ts/+(F)	623		;105387/+; (F)	771.667		;105387/9-137G4;tub80.ts/+	1074			;9-137G4/+;tub80.ts/+(F)	1087		;105387/+; (F)	1016		;105387/9-137G4;tub80.ts/+	1234.5
;9-137G4/+;tub80.ts/+(F)	718.333		;105387/+; (F)	869		;105387/9-137G4;tub80.ts/+	896			;9-137G4/+;tub80.ts/+(F)	1076.5		;105387/+; (F)	1070.5		;105387/9-137G4;tub80.ts/+	1057
;9-137G4/+;tub80.ts/+(F)	854		;105387/+; (F)	856.333		;105387/9-137G4;tub80.ts/+	1023.67			;9-137G4/+;tub80.ts/+(F)	713		;105387/+; (F)	1040.5		;105387/9-137G4;tub80.ts/+	1257
;9-137G4/+;tub80.ts/+(F)	806.333		;105387/+; (F)	876.333		;105387/9-137G4;tub80.ts/+	1091			;9-137G4/+;tub80.ts/+(F)	1038.5		;105387/+; (F)	959.5		;105387/9-137G4;tub80.ts/+	1201.5
;9-137G4/+;tub80.ts/+(F)	798.667		;105387/+; (F)	864		;105387/9-137G4;tub80.ts/+	857						;105387/+; (F)	1107		;105387/9-137G4;tub80.ts/+	1165.5
			;105387/+; (F)	864		;105387/9-137G4;tub80.ts/+	826						;105387/+; (F)	1094		;105387/9-137G4;tub80.ts/+	1026
			;105387/+; (F)	879.667		;105387/9-137G4;tub80.ts/+	671.667						;105387/+; (F)	1150.5		;105387/9-137G4;tub80.ts/+	990.5
			;105387/+; (F)	1091		;105387/9-137G4;tub80.ts/+	890.333						;105387/+; (F)	1184.5		;105387/9-137G4;tub80.ts/+	1048
			;105387/+; (F)	750.667		;105387/9-137G4;tub80.ts/+	1002						;105387/+; (F)	1055		;105387/9-137G4;tub80.ts/+	1187.5
			;105387/+; (F)	895.333		;105387/9-137G4;tub80.ts/+	916.333						;105387/+; (F)	1060.5		;105387/9-137G4;tub80.ts/+	1089.5
			;105387/+; (F)	861.333		;105387/9-137G4;tub80.ts/+	938						;105387/+; (F)	1101.5		;105387/9-137G4;tub80.ts/+	1048
			;105387/+; (F)	750.333		;105387/9-137G4;tub80.ts/+	883						;105387/+; (F)	919		;105387/9-137G4;tub80.ts/+	1026
			;105387/+; (F)	825		;105387/9-137G4;tub80.ts/+	1039.33						;105387/+; (F)	1108		;105387/9-137G4;tub80.ts/+	1181.5
;9-137G4/+;tub80.ts/+(F)	1009		;105071/+; (F)	813		;105071/9-137G4;tub80.ts/+	772			;9-137G4/+;tub80.ts/+(F)	725		;105071/+; (F)	730		;105071/9-137G4;tub80.ts/+	717
;9-137G4/+;tub80.ts/+(F)	906		;105071/+; (F)	850		;105071/9-137G4;tub80.ts/+	1102			;9-137G4/+;tub80.ts/+(F)	428		;105071/+; (F)	848		;105071/9-137G4;tub80.ts/+	1045
;9-137G4/+;tub80.ts/+(F)	973		;105071/+; (F)	1027		;105071/9-137G4;tub80.ts/+	767			;9-137G4/+;tub80.ts/+(F)	653		;105071/+; (F)	1022		;105071/9-137G4;tub80.ts/+	763
;9-137G4/+;tub80.ts/+(F)	902		;105071/+; (F)	870		;105071/9-137G4;tub80.ts/+	1049			;9-137G4/+;tub80.ts/+(F)	709		;105071/+; (F)	765		;105071/9-137G4;tub80.ts/+	1089
;9-137G4/+;tub80.ts/+(F)	1011		;105071/+; (F)	963		;105071/9-137G4;tub80.ts/+	909			;9-137G4/+;tub80.ts/+(F)	772		;105071/+; (F)	869		;105071/9-137G4;tub80.ts/+	1030
;9-137G4/+;tub80.ts/+(F)	880		;105071/+; (F)	802		;105071/9-137G4;tub80.ts/+	860			;9-137G4/+;tub80.ts/+(F)	585		;105071/+; (F)	752		;105071/9-137G4;tub80.ts/+	818
;9-137G4/+;tub80.ts/+(F)	980		;105071/+; (F)	908		;105071/9-137G4;tub80.ts/+	929			;9-137G4/+;tub80.ts/+(F)	733		;105071/+; (F)	1015		;105071/9-137G4;tub80.ts/+	791
;9-137G4/+;tub80.ts/+(F)	914		;105071/+; (F)	932		;105071/9-137G4;tub80.ts/+	782			;9-137G4/+;tub80.ts/+(F)	706		;105071/+; (F)	897		;105071/9-137G4;tub80.ts/+	926
;9-137G4/+;tub80.ts/+(F)	753		;105071/+; (F)	819		;105071/9-137G4;tub80.ts/+	671			;9-137G4/+;tub80.ts/+(F)	886		;105071/+; (F)	781		;105071/9-137G4;tub80.ts/+	931
;9-137G4/+;tub80.ts/+(F)	958		;105071/+; (F)	826		;105071/9-137G4;tub80.ts/+	920			;9-137G4/+;tub80.ts/+(F)	964		;105071/+; (F)	655		;105071/9-137G4;tub80.ts/+	851
;9-137G4/+;tub80.ts/+(F)	712		;105071/+; (F)	1078		;105071/9-137G4;tub80.ts/+	823			;9-137G4/+;tub80.ts/+(F)	721		;105071/+; (F)	960		;105071/9-137G4;tub80.ts/+	725
;9-137G4/+;tub80.ts/+(F)	813		;105071/+; (F)	970		;105071/9-137G4;tub80.ts/+	949			;9-137G4/+;tub80.ts/+(F)	762		;105071/+; (F)	958		;105071/9-137G4;tub80.ts/+	932
;9-137G4/+;tub80.ts/+(F)	825		;105071/+; (F)	948		;105071/9-137G4;tub80.ts/+	985			;9-137G4/+;tub80.ts/+(F)	895		;105071/+; (F)	944		;105071/9-137G4;tub80.ts/+	1005
;9-137G4/+;tub80.ts/+(F)	822		;105071/+; (F)	1051		;105071/9-137G4;tub80.ts/+	698			;9-137G4/+;tub80.ts/+(F)	887		;105071/+; (F)	836		;105071/9-137G4;tub80.ts/+	606
;9-137G4/+;tub80.ts/+(F)	797		;105071/+; (F)	963		;105071/9-137G4;tub80.ts/+	797			;9-137G4/+;tub80.ts/+(F)	1024		;105071/+; (F)	939		;105071/9-137G4;tub80.ts/+	993
;9-137G4/+;tub80.ts/+(F)	781		;105071/+; (F)	823		;105071/9-137G4;tub80.ts/+	805			;9-137G4/+;tub80.ts/+(F)	909		;105071/+; (F)	885		;105071/9-137G4;tub80.ts/+	801
;9-137G4/+;tub80.ts/+(F)	753		;105071/+; (F)	995		;105071/9-137G4;tub80.ts/+	899			;9-137G4/+;tub80.ts/+(F)	979		;105071/+; (F)	1100		;105071/9-137G4;tub80.ts/+	1169
;9-137G4/+;tub80.ts/+(F)	770		;105071/+; (F)	1011		;105071/9-137G4;tub80.ts/+	654			;9-137G4/+;tub80.ts/+(F)	906		;105071/+; (F)	1195		;105071/9-137G4;tub80.ts/+	920
;9-137G4/+;tub80.ts/+(F)	662		;105071/+; (F)	868		;105071/9-137G4;tub80.ts/+	865			;9-137G4/+;tub80.ts/+(F)	1063		;105071/+; (F)	934		;105071/9-137G4;tub80.ts/+	1002
;9-137G4/+;tub80.ts/+(F)	939		;105071/+; (F)	832		;105071/9-137G4;tub80.ts/+	634			;9-137G4/+;tub80.ts/+(F)	870		;105071/+; (F)	1185		;105071/9-137G4;tub80.ts/+	1002
;9-137G4/+;tub80.ts/+(F)	828		;105071/+; (F)	965		;105071/9-137G4;tub80.ts/+	856			;9-137G4/+;tub80.ts/+(F)	1045		;105071/+; (F)	1110		;105071/9-137G4;tub80.ts/+	1185
;9-137G4/+;tub80.ts/+(F)	946		;105071/+; (F)	827		;105071/9-137G4;tub80.ts/+	800			;9-137G4/+;tub80.ts/+(F)	922		;105071/+; (F)	1005		;105071/9-137G4;tub80.ts/+	1060
;9-137G4/+;tub80.ts/+(F)	783		;105071/+; (F)	881		;105071/9-137G4;tub80.ts/+	932			;9-137G4/+;tub80.ts/+(F)	929		;105071/+; (F)	1012		;105071/9-137G4;tub80.ts/+	963
;9-137G4/+;tub80.ts/+(F)	728		;105071/+; (F)	1083		;105071/9-137G4;tub80.ts/+	797			;9-137G4/+;tub80.ts/+(F)	1015		;105071/+; (F)	1187		;105071/9-137G4;tub80.ts/+	1053
;9-137G4/+;tub80.ts/+(F)	935.667		;105071/+; (F)	1004		;105071/9-137G4;tub80.ts/+	594			;9-137G4/+;tub80.ts/+(F)	1177		;105071/+; (F)	1218		;105071/9-137G4;tub80.ts/+	964
;9-137G4/+;tub80.ts/+(F)	864.333		;105071/+; (F)	950		;105071/9-137G4;tub80.ts/+	950			;9-137G4/+;tub80.ts/+(F)	1140.5		;105071/+; (F)	1100		;105071/9-137G4;tub80.ts/+	1029
;9-137G4/+;tub80.ts/+(F)	827		;105071/+; (F)	1058		;105071/9-137G4;tub80.ts/+	1021			;9-137G4/+;tub80.ts/+(F)	883		;105071/+; (F)	1030		;105071/9-137G4;tub80.ts/+	1278
;9-137G4/+;tub80.ts/+(F)	650.333		;105071/+; (F)	700		;105071/9-137G4;tub80.ts/+	980			;9-137G4/+;tub80.ts/+(F)	996		;105071/+; (F)	1181		;105071/9-137G4;tub80.ts/+	1145
;9-137G4/+;tub80.ts/+(F)	790.333		;105071/+; (F)	852		;105071/9-137G4;tub80.ts/+	765			;9-137G4/+;tub80.ts/+(F)	889		;105071/+; (F)	937		;105071/9-137G4;tub80.ts/+	1148
;9-137G4/+;tub80.ts/+(F)	567.333		;105071/+; (F)	1025		;105071/9-137G4;tub80.ts/+	869			;9-137G4/+;tub80.ts/+(F)	1041		;105071/+; (F)	946		;105071/9-137G4;tub80.ts/+	1086
;9-137G4/+;tub80.ts/+(F)	806.667		;105071/+; (F)	792		;105071/9-137G4;tub80.ts/+	959			;9-137G4/+;tub80.ts/+(F)	1191		;105071/+; (F)	976		;105071/9-137G4;tub80.ts/+	1135
;9-137G4/+;tub80.ts/+(F)	1108.67		;105071/+; (F)	884		;105071/9-137G4;tub80.ts/+	815			;9-137G4/+;tub80.ts/+(F)	1001		;105071/+; (F)	963		;105071/9-137G4;tub80.ts/+	1062
;9-137G4/+;tub80.ts/+(F)	925.667		;105071/+; (F)	808		;105071/9-137G4;tub80.ts/+	1002			;9-137G4/+;tub80.ts/+(F)	1121		;105071/+; (F)	1098		;105071/9-137G4;tub80.ts/+	1232
;9-137G4/+;tub80.ts/+(F)	854.667		;105071/+; (F)	981		;105071/9-137G4;tub80.ts/+	732			;9-137G4/+;tub80.ts/+(F)	926.5		;105071/+; (F)	1017.5		;105071/9-137G4;tub80.ts/+	1037
;9-137G4/+;tub80.ts/+(F)	806.667		;105071/+; (F)	938		;105071/9-137G4;tub80.ts/+	946			;9-137G4/+;tub80.ts/+(F)	913.5		;105071/+; (F)	1148		;105071/9-137G4;tub80.ts/+	1067.5
;9-137G4/+;tub80.ts/+(F)	623		;105071/+; (F)	896.667		;105071/9-137G4;tub80.ts/+	773			;9-137G4/+;tub80.ts/+(F)	1087		;105071/+; (F)	1136		;105071/9-137G4;tub80.ts/+	990.5
;9-137G4/+;tub80.ts/+(F)	718.333		;105071/+; (F)	843		;105071/9-137G4;tub80.ts/+	986			;9-137G4/+;tub80.ts/+(F)	1076.5		;105071/+; (F)	1035		;105071/9-137G4;tub80.ts/+	1178
;9-137G4/+;tub80.ts/+(F)	854		;105071/+; (F)	729		;105071/9-137G4;tub80.ts/+	702.667			;9-137G4/+;tub80.ts/+(F)	713		;105071/+; (F)	923		;105071/9-137G4;tub80.ts/+	976
;9-137G4/+;tub80.ts/+(F)	806.333		;105071/+; (F)	849.667		;105071/9-137G4;tub80.ts/+	964.667			;9-137G4/+;tub80.ts/+(F)	1038.5		;105071/+; (F)	1123.5		;105071/9-137G4;tub80.ts/+	1168.5
;9-137G4/+;tub80.ts/+(F)	798.667		;105071/+; (F)	763.667		;105071/9-137G4;tub80.ts/+	929.667			;9-137G4/+;tub80.ts/+(F)			;105071/+; (F)	972		;105071/9-137G4;tub80.ts/+	1012.5
			;105071/+; (F)	666		;105071/9-137G4;tub80.ts/+	1046						;105071/+; (F)	896		;105071/9-137G4;tub80.ts/+	1183.5
			;105071/+; (F)	777		;105071/9-137G4;tub80.ts/+	929						;105071/+; (F)	1043		;105071/9-137G4;tub80.ts/+	1109
			;105071/+; (F)	826		;105071/9-137G4;tub80.ts/+	948.667						;105071/+; (F)	1119		;105071/9-137G4;tub80.ts/+	1106.5
			;105071/+; (F)	682.667		;105071/9-137G4;tub80.ts/+	933						;105071/+; (F)	1016.5		;105071/9-137G4;tub80.ts/+	1003.5
			;105071/+; (F)	736.667		;105071/9-137G4;tub80.ts/+	1107						;105071/+; (F)	969.5		;105071/9-137G4;tub80.ts/+	1217.5
			;105071/+; (F)	610.333		;105071/9-137G4;tub80.ts/+	660						;105071/+; (F)	930		;105071/9-137G4;tub80.ts/+	1192.5
			;105071/+; (F)	778.667		;105071/9-137G4;tub80.ts/+	1086.67						;105071/+; (F)	1126		;105071/9-137G4;tub80.ts/+	1155.5
						;105071/9-137G4;tub80.ts/+	809.667									;105071/9-137G4;tub80.ts/+	1190.5
;9-137G4/+;tub80.ts/+(F)	848.667		;36389/+	738		;36389/9-137G4;tub80.ts/+	657			;9-137G4/+;tub80.ts/+(F)	775		;36389/+	353		;36389/9-137G4;tub80.ts/+	692
;9-137G4/+;tub80.ts/+(F)	653.667		;36389/+	685.333		;36389/9-137G4;tub80.ts/+	744			;9-137G4/+;tub80.ts/+(F)	250		;36389/+	462		;36389/9-137G4;tub80.ts/+	680.5
;9-137G4/+;tub80.ts/+(F)	572.667		;36389/+	660.333		;36389/9-137G4;tub80.ts/+	778			;9-137G4/+;tub80.ts/+(F)	462		;36389/+	657.5		;36389/9-137G4;tub80.ts/+	550.5
;9-137G4/+;tub80.ts/+(F)	677		;36389/+	629		;36389/9-137G4;tub80.ts/+	701			;9-137G4/+;tub80.ts/+(F)	683		;36389/+	339		;36389/9-137G4;tub80.ts/+	511.5
;9-137G4/+;tub80.ts/+(F)	788.333		;36389/+	562.333		;36389/9-137G4;tub80.ts/+	737.333			;9-137G4/+;tub80.ts/+(F)	416.5		;36389/+	469		;36389/9-137G4;tub80.ts/+	736.5
;9-137G4/+;tub80.ts/+(F)	763		;36389/+	555		;36389/9-137G4;tub80.ts/+	850			;9-137G4/+;tub80.ts/+(F)	364.5		;36389/+	372.5		;36389/9-137G4;tub80.ts/+	530
;9-137G4/+;tub80.ts/+(F)	579.333		;36389/+	909.333		;36389/9-137G4;tub80.ts/+	628.333			;9-137G4/+;tub80.ts/+(F)	327.5		;36389/+	1294		;36389/9-137G4;tub80.ts/+	365
;9-137G4/+;tub80.ts/+(F)	361.667		;36389/+	665		;36389/9-137G4;tub80.ts/+	455.667			;9-137G4/+;tub80.ts/+(F)	187		;36389/+	740		;36389/9-137G4;tub80.ts/+	403
;9-137G4/+;tub80.ts/+(F)	460.333		;36389/+	954.667		;36389/9-137G4;tub80.ts/+	542			;9-137G4/+;tub80.ts/+(F)	415.5		;36389/+	971.5		;36389/9-137G4;tub80.ts/+	431
;9-137G4/+;tub80.ts/+(F)	519.667		;36389/+	710		;36389/9-137G4;tub80.ts/+	562.667			;9-137G4/+;tub80.ts/+(F)	291.5		;36389/+	236.5		;36389/9-137G4;tub80.ts/+	299.5
;9-137G4/+;tub80.ts/+(F)	570.667		;36389/+	683.667		;36389/9-137G4;tub80.ts/+	753.667			;9-137G4/+;tub80.ts/+(F)	737.5		;36389/+	737.5		;36389/9-137G4;tub80.ts/+	658.5
;9-137G4/+;tub80.ts/+(F)	777.667		;36389/+	658.333		;36389/9-137G4;tub80.ts/+	794.667			;9-137G4/+;tub80.ts/+(F)	559.5		;36389/+	664.5		;36389/9-137G4;tub80.ts/+	726.5
;9-137G4/+;tub80.ts/+(F)	910.667		;36389/+	547.333		;36389/9-137G4;tub80.ts/+	521.333			;9-137G4/+;tub80.ts/+(F)	548		;36389/+	512.5		;36389/9-137G4;tub80.ts/+	519.5
;9-137G4/+;tub80.ts/+(F)	937.667		;36389/+	584.333		;36389/9-137G4;tub80.ts/+	627.667			;9-137G4/+;tub80.ts/+(F)	775.5		;36389/+	281		;36389/9-137G4;tub80.ts/+	309
;9-137G4/+;tub80.ts/+(F)	803.333		;36389/+	521.333		;36389/9-137G4;tub80.ts/+	590.667			;9-137G4/+;tub80.ts/+(F)	616		;36389/+	198		;36389/9-137G4;tub80.ts/+	454
;9-137G4/+;tub80.ts/+(F)	669		;36389/+	519		;36389/9-137G4;tub80.ts/+	654			;9-137G4/+;tub80.ts/+(F)	324.5		;36389/+	492.5		;36389/9-137G4;tub80.ts/+	457.5
;9-137G4/+;tub80.ts/+(F)	731		;36389/+	418.333		;36389/9-137G4;tub80.ts/+	402.333			;9-137G4/+;tub80.ts/+(F)	547		;36389/+	339		;36389/9-137G4;tub80.ts/+	244.5
;9-137G4/+;tub80.ts/+(F)	698		;36389/+	446		;36389/9-137G4;tub80.ts/+	846			;9-137G4/+;tub80.ts/+(F)	626		;36389/+	511		;36389/9-137G4;tub80.ts/+	954.5
;9-137G4/+;tub80.ts/+(F)	721.667		;36389/+	511		;36389/9-137G4;tub80.ts/+	437.667			;9-137G4/+;tub80.ts/+(F)	384		;36389/+	229.5		;36389/9-137G4;tub80.ts/+	228.5
;9-137G4/+;tub80.ts/+(F)	697.333		;36389/+	753		;36389/9-137G4;tub80.ts/+	682.333			;9-137G4/+;tub80.ts/+(F)	541		;36389/+	544.5		;36389/9-137G4;tub80.ts/+	218
;9-137G4/+;tub80.ts/+(F)	903.333		;36389/+	483.667		;36389/9-137G4;tub80.ts/+	647.333			;9-137G4/+;tub80.ts/+(F)	764		;36389/+	136.5		;36389/9-137G4;tub80.ts/+	232
;9-137G4/+;tub80.ts/+(F)	824		;36389/+	614		;36389/9-137G4;tub80.ts/+	514.333			;9-137G4/+;tub80.ts/+(F)	512		;36389/+	487.5		;36389/9-137G4;tub80.ts/+	337
;9-137G4/+;tub80.ts/+(F)	879		;36389/+	657.333		;36389/9-137G4;tub80.ts/+	573.667			;9-137G4/+;tub80.ts/+(F)	715.5		;36389/+	584		;36389/9-137G4;tub80.ts/+	390.5
;9-137G4/+;tub80.ts/+(F)	799.333		;36389/+	825.333		;36389/9-137G4;tub80.ts/+	586			;9-137G4/+;tub80.ts/+(F)	559		;36389/+	696.5		;36389/9-137G4;tub80.ts/+	339.5
;9-137G4/+;tub80.ts/+(F)	788		;36389/+	639		;36389/9-137G4;tub80.ts/+	572.333			;9-137G4/+;tub80.ts/+(F)	622.5		;36389/+	264		;36389/9-137G4;tub80.ts/+	378
;9-137G4/+;tub80.ts/+(F)	593		;36389/+	769.667		;36389/9-137G4;tub80.ts/+	520			;9-137G4/+;tub80.ts/+(F)	152		;36389/+	451.5		;36389/9-137G4;tub80.ts/+	293
;9-137G4/+;tub80.ts/+(F)	723.333		;36389/+	463		;36389/9-137G4;tub80.ts/+	604.667			;9-137G4/+;tub80.ts/+(F)	420.5		;36389/+	321.5		;36389/9-137G4;tub80.ts/+	575.5
;9-137G4/+;tub80.ts/+(F)	524.667		;36389/+	501		;36389/9-137G4;tub80.ts/+	547.333			;9-137G4/+;tub80.ts/+(F)	257.5		;36389/+	288		;36389/9-137G4;tub80.ts/+	529.5
;9-137G4/+;tub80.ts/+(F)	962.667		;36389/+	491		;36389/9-137G4;tub80.ts/+	1019.33			;9-137G4/+;tub80.ts/+(F)	840.5		;36389/+	373		;36389/9-137G4;tub80.ts/+	846
;9-137G4/+;tub80.ts/+(F)	697.333		;36389/+	767		;36389/9-137G4;tub80.ts/+	566.333			;9-137G4/+;tub80.ts/+(F)	612.5		;36389/+	420		;36389/9-137G4;tub80.ts/+	451
;9-137G4/+;tub80.ts/+(F)	882		;36389/+	489.333		;36389/9-137G4;tub80.ts/+	547.333			;9-137G4/+;tub80.ts/+(F)	644.5		;36389/+	285		;36389/9-137G4;tub80.ts/+	353.5
;9-137G4/+;tub80.ts/+(F)	882		;36389/+	511.667		;36389/9-137G4;tub80.ts/+	561			;9-137G4/+;tub80.ts/+(F)	600		;36389/+	189		;36389/9-137G4;tub80.ts/+	410
;9-137G4/+;tub80.ts/+(F)	848.667		;27242/+	1025.33		;27242/9-137G4;tub80.ts/+	750.333			;9-137G4/+;tub80.ts/+(F)	775		;27242/+	542.5		;27242/9-137G4;tub80.ts/+	505.5
;9-137G4/+;tub80.ts/+(F)	653.667		;27242/+	703		;27242/9-137G4;tub80.ts/+	712.667			;9-137G4/+;tub80.ts/+(F)	250		;27242/+	617		;27242/9-137G4;tub80.ts/+	698.5
;9-137G4/+;tub80.ts/+(F)	572.667		;27242/+	792		;27242/9-137G4;tub80.ts/+	482			;9-137G4/+;tub80.ts/+(F)	462		;27242/+	505.5		;27242/9-137G4;tub80.ts/+	307.5
;9-137G4/+;tub80.ts/+(F)	677		;27242/+	830.667		;27242/9-137G4;tub80.ts/+	494.333			;9-137G4/+;tub80.ts/+(F)	683		;27242/+	551		;27242/9-137G4;tub80.ts/+	299
;9-137G4/+;tub80.ts/+(F)	788.333		;27242/+	748		;27242/9-137G4;tub80.ts/+	636.667			;9-137G4/+;tub80.ts/+(F)	416.5		;27242/+	300.5		;27242/9-137G4;tub80.ts/+	504
;9-137G4/+;tub80.ts/+(F)	763		;27242/+	613		;27242/9-137G4;tub80.ts/+	592.333			;9-137G4/+;tub80.ts/+(F)	364.5		;27242/+	561.5		;27242/9-137G4;tub80.ts/+	234
;9-137G4/+;tub80.ts/+(F)	579.333		;27242/+	754		;27242/9-137G4;tub80.ts/+	704.333			;9-137G4/+;tub80.ts/+(F)	327.5		;27242/+	387.5		;27242/9-137G4;tub80.ts/+	485
;9-137G4/+;tub80.ts/+(F)	361.667		;27242/+	552		;27242/9-137G4;tub80.ts/+	617.667			;9-137G4/+;tub80.ts/+(F)	187		;27242/+	322		;27242/9-137G4;tub80.ts/+	521.5
;9-137G4/+;tub80.ts/+(F)	460.333		;27242/+	697		;27242/9-137G4;tub80.ts/+	970			;9-137G4/+;tub80.ts/+(F)	415.5		;27242/+	731.5		;27242/9-137G4;tub80.ts/+	525
;9-137G4/+;tub80.ts/+(F)	519.667		;27242/+	734.333		;27242/9-137G4;tub80.ts/+	647.667			;9-137G4/+;tub80.ts/+(F)	291.5		;27242/+	702		;27242/9-137G4;tub80.ts/+	587
;9-137G4/+;tub80.ts/+(F)	570.667		;27242/+	712.333		;27242/9-137G4;tub80.ts/+	710			;9-137G4/+;tub80.ts/+(F)	737.5		;27242/+	914.5		;27242/9-137G4;tub80.ts/+	498
;9-137G4/+;tub80.ts/+(F)	777.667		;27242/+	907.333		;27242/9-137G4;tub80.ts/+	715.667			;9-137G4/+;tub80.ts/+(F)	559.5		;27242/+	339.5		;27242/9-137G4;tub80.ts/+	518.5
;9-137G4/+;tub80.ts/+(F)	910.667		;27242/+	601.333		;27242/9-137G4;tub80.ts/+	587			;9-137G4/+;tub80.ts/+(F)	548		;27242/+	498.5		;27242/9-137G4;tub80.ts/+	455.5
;9-137G4/+;tub80.ts/+(F)	937.667		;27242/+	707.667		;27242/9-137G4;tub80.ts/+	536.333			;9-137G4/+;tub80.ts/+(F)	775.5		;27242/+	328		;27242/9-137G4;tub80.ts/+	311
;9-137G4/+;tub80.ts/+(F)	803.333		;27242/+	732.333		;27242/9-137G4;tub80.ts/+	767.333			;9-137G4/+;tub80.ts/+(F)	616		;27242/+	662		;27242/9-137G4;tub80.ts/+	428
;9-137G4/+;tub80.ts/+(F)	669		;27242/+	804.333		;27242/9-137G4;tub80.ts/+	421			;9-137G4/+;tub80.ts/+(F)	324.5		;27242/+	273		;27242/9-137G4;tub80.ts/+	234
;9-137G4/+;tub80.ts/+(F)	731		;27242/+	543.333		;27242/9-137G4;tub80.ts/+	634.333			;9-137G4/+;tub80.ts/+(F)	547		;27242/+	749.5		;27242/9-137G4;tub80.ts/+	589.5
;9-137G4/+;tub80.ts/+(F)	698		;27242/+	708		;27242/9-137G4;tub80.ts/+	521.667			;9-137G4/+;tub80.ts/+(F)	626		;27242/+	236		;27242/9-137G4;tub80.ts/+	607.5
;9-137G4/+;tub80.ts/+(F)	721.667		;27242/+	527.333		;27242/9-137G4;tub80.ts/+	652			;9-137G4/+;tub80.ts/+(F)	384		;27242/+	180.5		;27242/9-137G4;tub80.ts/+	548.5
;9-137G4/+;tub80.ts/+(F)	697.333		;27242/+	449.667		;27242/9-137G4;tub80.ts/+	746.667			;9-137G4/+;tub80.ts/+(F)	541		;27242/+	499.5		;27242/9-137G4;tub80.ts/+	495.5
;9-137G4/+;tub80.ts/+(F)	903.333		;27242/+	796		;27242/9-137G4;tub80.ts/+	714			;9-137G4/+;tub80.ts/+(F)	764		;27242/+	429.5		;27242/9-137G4;tub80.ts/+	619
;9-137G4/+;tub80.ts/+(F)	824		;27242/+	593.667		;27242/9-137G4;tub80.ts/+	647			;9-137G4/+;tub80.ts/+(F)	512		;27242/+	558.5		;27242/9-137G4;tub80.ts/+	513.5
;9-137G4/+;tub80.ts/+(F)	879		;27242/+	682.333		;27242/9-137G4;tub80.ts/+	832.333			;9-137G4/+;tub80.ts/+(F)	715.5		;27242/+	182.5		;27242/9-137G4;tub80.ts/+	656.5
;9-137G4/+;tub80.ts/+(F)	799.333		;27242/+	745.333		;27242/9-137G4;tub80.ts/+	490.333			;9-137G4/+;tub80.ts/+(F)	559		;27242/+	185.5		;27242/9-137G4;tub80.ts/+	452.5
;9-137G4/+;tub80.ts/+(F)	788		;27242/+	451.667		;27242/9-137G4;tub80.ts/+	559			;9-137G4/+;tub80.ts/+(F)	622.5		;27242/+	272.5		;27242/9-137G4;tub80.ts/+	359
;9-137G4/+;tub80.ts/+(F)	593		;27242/+	473		;27242/9-137G4;tub80.ts/+	657			;9-137G4/+;tub80.ts/+(F)	152		;27242/+	379.5		;27242/9-137G4;tub80.ts/+	626
;9-137G4/+;tub80.ts/+(F)	723.333		;27242/+	646		;27242/9-137G4;tub80.ts/+	636.667			;9-137G4/+;tub80.ts/+(F)	420.5		;27242/+	692		;27242/9-137G4;tub80.ts/+	561
;9-137G4/+;tub80.ts/+(F)	524.667		;27242/+	692		;27242/9-137G4;tub80.ts/+	415.667			;9-137G4/+;tub80.ts/+(F)	257.5		;27242/+	513		;27242/9-137G4;tub80.ts/+	436
;9-137G4/+;tub80.ts/+(F)	962.667		;27242/+	555		;27242/9-137G4;tub80.ts/+	712			;9-137G4/+;tub80.ts/+(F)	840.5		;27242/+	562		;27242/9-137G4;tub80.ts/+	581
;9-137G4/+;tub80.ts/+(F)	697.333		;27242/+	564.333		;27242/9-137G4;tub80.ts/+	565.667			;9-137G4/+;tub80.ts/+(F)	612.5		;27242/+	513.5		;27242/9-137G4;tub80.ts/+	642.5
;9-137G4/+;tub80.ts/+(F)	882		;27242/+	682.667		;27242/9-137G4;tub80.ts/+	527.667			;9-137G4/+;tub80.ts/+(F)	644.5		;27242/+	521		;27242/9-137G4;tub80.ts/+	574
;9-137G4/+;tub80.ts/+(F)	882		;27242/+	701.667		;27242/9-137G4;tub80.ts/+	769			;9-137G4/+;tub80.ts/+(F)	600					;27242/9-137G4;tub80.ts/+	476.5
