# Supplementary material for: Modulation of sleep by trafficking of lipids through the Drosophila blood-brain barrier
Source: eLife. 2023 May 4;12:e86336. doi: 10.7554/eLife.86336 (PMC10205086; doi:10.7554/eLife.86336)
Supplement: Figure 3—figure supplement 7—source data 1. [file elife-86336-fig3-figsupp7-data1.xlsx]

## Sheet: Sheet1
Lrp1	relative cDNA level (ddCT)		Megalin	relative cDNA level(ddCT)
;105071/Act G4;8397/+	0.402152		;36389/Act G4	0.267478
;105071/Act G4;8397/+	0.256691		;36389/Act G4	0.332527
;105071/Act G4;8397/+	0.223987		;36389/Act G4	0.277718
;Act G4/3710	1.18754		;105387/Act G4	0.649473
;Act G4/3710	1.25133		;105387/Act G4	0.683529
;Act G4/3710	1.31531		;105387/Act G4	0.490983
;Act G4/31151	1.67933		;27242/Act G4	0.781019
;Act G4/31151	1.46236		;27242/Act G4	1.10189
;Act G4/31151	1.31831		;27242/Act G4	0.716279
;ActG4/8397	0.488185		;105071/Act/G4;8397/+	0.402152
;ActG4/8397	0.187967		;105071/Act/G4;8397/+	0.256691
;ActG4/8397	0.211416		;105071/Act/G4;8397/+	0.223987
;ActG4/13913	0.692782		Iso31	1.01639
;ActG4/13913	0.278225		Iso31	0.900442
;ActG4/13913	0.378602		Iso31	1.09266
;ActG4/109605	1.93223
;ActG4/109605	1.26477
;ActG4/109605	1.56872
Iso31	0.747251
Iso31	1.26146
Iso31	1.06087
