# Supplementary material for: Modulation of sleep by trafficking of lipids through the Drosophila blood-brain barrier
Source: eLife. 2023 May 4;12:e86336. doi: 10.7554/eLife.86336 (PMC10205086; doi:10.7554/eLife.86336)
Supplement: Figure 3—figure supplement 8—source data 1. [file elife-86336-fig3-figsupp8-data1.xlsx]

## Sheet: Sheet1
18 degree									31 degree
GAL4 Control	Total Sleep		UAS Control	Total Sleep		GAL4 x UAS	Total Sleep		GAL4 Control	Total Sleep		UAS Control	Total Sleep		GAL4 x UAS	Total Sleep
; tub80.ts/+;MZ0709/+(F)	676.5		;105071/+;8397/+(F)	1022.25		;105071/tub80ts;8397/MZ0709 (F)	748.75		; tub80.ts/+;MZ0709/+(F)	824		;105071/+;8397/+(F)	1204.5		;105071/tub80ts;8397/MZ0709 (F)	924.5
; tub80.ts/+;MZ0709/+(F)	657		;105071/+;8397/+(F)	987.5		;105071/tub80ts;8397/MZ0709 (F)	731		; tub80.ts/+;MZ0709/+(F)	787.5		;105071/+;8397/+(F)	1051.5		;105071/tub80ts;8397/MZ0709 (F)	931
; tub80.ts/+;MZ0709/+(F)	1006.75		;105071/+;8397/+(F)	760.25		;105071/tub80ts;8397/MZ0709 (F)	722.25		; tub80.ts/+;MZ0709/+(F)	1004		;105071/+;8397/+(F)	1060.5		;105071/tub80ts;8397/MZ0709 (F)	879
; tub80.ts/+;MZ0709/+(F)	784.5		;105071/+;8397/+(F)	885.75		;105071/tub80ts;8397/MZ0709 (F)	933.5		; tub80.ts/+;MZ0709/+(F)	892.5		;105071/+;8397/+(F)	1108		;105071/tub80ts;8397/MZ0709 (F)	1010.5
; tub80.ts/+;MZ0709/+(F)	748.75		;105071/+;8397/+(F)	931.5		;105071/tub80ts;8397/MZ0709 (F)	910.5		; tub80.ts/+;MZ0709/+(F)	1022.5		;105071/+;8397/+(F)	1159		;105071/tub80ts;8397/MZ0709 (F)	1008
; tub80.ts/+;MZ0709/+(F)	737.5		;105071/+;8397/+(F)	807.25		;105071/tub80ts;8397/MZ0709 (F)	901.75		; tub80.ts/+;MZ0709/+(F)	939.5		;105071/+;8397/+(F)	1192.5		;105071/tub80ts;8397/MZ0709 (F)	946
; tub80.ts/+;MZ0709/+(F)	693		;105071/+;8397/+(F)	882.25		;105071/tub80ts;8397/MZ0709 (F)	920		; tub80.ts/+;MZ0709/+(F)	787.5		;105071/+;8397/+(F)	1205		;105071/tub80ts;8397/MZ0709 (F)	951
; tub80.ts/+;MZ0709/+(F)	782.75		;105071/+;8397/+(F)	865.25		;105071/tub80ts;8397/MZ0709 (F)	935.75		; tub80.ts/+;MZ0709/+(F)	974		;105071/+;8397/+(F)	1104.5		;105071/tub80ts;8397/MZ0709 (F)	1130
; tub80.ts/+;MZ0709/+(F)	746.5		;105071/+;8397/+(F)	824		;105071/tub80ts;8397/MZ0709 (F)	1004.5		; tub80.ts/+;MZ0709/+(F)	699.5		;105071/+;8397/+(F)	1160.5		;105071/tub80ts;8397/MZ0709 (F)	1047
; tub80.ts/+;MZ0709/+(F)	880		;105071/+;8397/+(F)	841.25		;105071/tub80ts;8397/MZ0709 (F)	991.5		; tub80.ts/+;MZ0709/+(F)	1021.5		;105071/+;8397/+(F)	1198.5		;105071/tub80ts;8397/MZ0709 (F)	866.5
; tub80.ts/+;MZ0709/+(F)	735.5		;105071/+;8397/+(F)	732.25		;105071/tub80ts;8397/MZ0709 (F)	801.25		; tub80.ts/+;MZ0709/+(F)	993.5		;105071/+;8397/+(F)	1137.5		;105071/tub80ts;8397/MZ0709 (F)	945
; tub80.ts/+;MZ0709/+(F)	936.25		;105071/+;8397/+(F)	990.75		;105071/tub80ts;8397/MZ0709 (F)	807.75		; tub80.ts/+;MZ0709/+(F)	1076.5		;105071/+;8397/+(F)	1140.5		;105071/tub80ts;8397/MZ0709 (F)	1047.5
; tub80.ts/+;MZ0709/+(F)	718		;105071/+;8397/+(F)	887.75		;105071/tub80ts;8397/MZ0709 (F)	782.5		; tub80.ts/+;MZ0709/+(F)	1023		;105071/+;8397/+(F)	1114		;105071/tub80ts;8397/MZ0709 (F)	949.5
; tub80.ts/+;MZ0709/+(F)	555.75		;105071/+;8397/+(F)	864.75		;105071/tub80ts;8397/MZ0709 (F)	853.5		; tub80.ts/+;MZ0709/+(F)	762		;105071/+;8397/+(F)	1245		;105071/tub80ts;8397/MZ0709 (F)	1061
; tub80.ts/+;MZ0709/+(F)	699.5		;105071/+;8397/+(F)	1057.25		;105071/tub80ts;8397/MZ0709 (F)	778.25		; tub80.ts/+;MZ0709/+(F)	978		;105071/+;8397/+(F)	1267		;105071/tub80ts;8397/MZ0709 (F)	929
; tub80.ts/+;MZ0709/+(F)	782		;105071/+;8397/+(F)	987.5		;105071/tub80ts;8397/MZ0709 (F)	872.5		; tub80.ts/+;MZ0709/+(F)	1056		;105071/+;8397/+(F)	943		;105071/tub80ts;8397/MZ0709 (F)	876.5
; tub80.ts/+;MZ0709/+(F)	854.667		;105071/+;8397/+(F)	748.333		;105071/tub80ts;8397/MZ0709 (F)	912.333		; tub80.ts/+;MZ0709/+(F)	797		;105071/+;8397/+(F)	1028		;105071/tub80ts;8397/MZ0709 (F)	827.5
; tub80.ts/+;MZ0709/+(F)	755		;105071/+;8397/+(F)	880.667		;105071/tub80ts;8397/MZ0709 (F)	841.333		; tub80.ts/+;MZ0709/+(F)	933.5		;105071/+;8397/+(F)	833.5		;105071/tub80ts;8397/MZ0709 (F)	850
; tub80.ts/+;MZ0709/+(F)	736.333		;105071/+;8397/+(F)	707.667		;105071/tub80ts;8397/MZ0709 (F)	874.667		; tub80.ts/+;MZ0709/+(F)	467.5		;105071/+;8397/+(F)	1062.5		;105071/tub80ts;8397/MZ0709 (F)	720.5
; tub80.ts/+;MZ0709/+(F)	655		;105071/+;8397/+(F)	938.667		;105071/tub80ts;8397/MZ0709 (F)	760		; tub80.ts/+;MZ0709/+(F)	538.5		;105071/+;8397/+(F)	1010.5		;105071/tub80ts;8397/MZ0709 (F)	846
; tub80.ts/+;MZ0709/+(F)	730		;105071/+;8397/+(F)	915		;105071/tub80ts;8397/MZ0709 (F)	899		; tub80.ts/+;MZ0709/+(F)	752.5		;105071/+;8397/+(F)	993.5		;105071/tub80ts;8397/MZ0709 (F)	743.5
; tub80.ts/+;MZ0709/+(F)	612		;105071/+;8397/+(F)	871.333		;105071/tub80ts;8397/MZ0709 (F)	792		; tub80.ts/+;MZ0709/+(F)	566.5		;105071/+;8397/+(F)	1160.5		;105071/tub80ts;8397/MZ0709 (F)	753
; tub80.ts/+;MZ0709/+(F)	577.667		;105071/+;8397/+(F)	935		;105071/tub80ts;8397/MZ0709 (F)	743.667		; tub80.ts/+;MZ0709/+(F)	886		;105071/+;8397/+(F)	1005.5		;105071/tub80ts;8397/MZ0709 (F)	901.5
; tub80.ts/+;MZ0709/+(F)	661.333		;105071/+;8397/+(F)	955		;105071/tub80ts;8397/MZ0709 (F)	827.667		; tub80.ts/+;MZ0709/+(F)	709		;105071/+;8397/+(F)	975.5		;105071/tub80ts;8397/MZ0709 (F)	874
; tub80.ts/+;MZ0709/+(F)	636.667		;105071/+;8397/+(F)	740		;105071/tub80ts;8397/MZ0709 (F)	874.333		; tub80.ts/+;MZ0709/+(F)	698.5		;105071/+;8397/+(F)	1030		;105071/tub80ts;8397/MZ0709 (F)	780
; tub80.ts/+;MZ0709/+(F)	789		;105071/+;8397/+(F)	841.333		;105071/tub80ts;8397/MZ0709 (F)	824		; tub80.ts/+;MZ0709/+(F)	630.5		;105071/+;8397/+(F)	745.5		;105071/tub80ts;8397/MZ0709 (F)	922.5
; tub80.ts/+;MZ0709/+(F)	754.333		;105071/+;8397/+(F)	628.667		;105071/tub80ts;8397/MZ0709 (F)	998		; tub80.ts/+;MZ0709/+(F)	1186.5		;105071/+;8397/+(F)	909		;105071/tub80ts;8397/MZ0709 (F)	1015
; tub80.ts/+;MZ0709/+(F)	583		;105071/+;8397/+(F)	788		;105071/tub80ts;8397/MZ0709 (F)	941.333		; tub80.ts/+;MZ0709/+(F)	580.5		;105071/+;8397/+(F)	804		;105071/tub80ts;8397/MZ0709 (F)	1090.5
; tub80.ts/+;MZ0709/+(F)	779.667		;105071/+;8397/+(F)	648.333		;105071/tub80ts;8397/MZ0709 (F)	737.667		; tub80.ts/+;MZ0709/+(F)	692.5		;105071/+;8397/+(F)	1004.5		;105071/tub80ts;8397/MZ0709 (F)	629
; tub80.ts/+;MZ0709/+(F)	833		;105071/+;8397/+(F)	874		;105071/tub80ts;8397/MZ0709 (F)	827		; tub80.ts/+;MZ0709/+(F)	770.5		;105071/+;8397/+(F)	817.5		;105071/tub80ts;8397/MZ0709 (F)	861
; tub80.ts/+;MZ0709/+(F)	663.333		;105071/+;8397/+(F)	657.333		;105071/tub80ts;8397/MZ0709 (F)	667		; tub80.ts/+;MZ0709/+(F)	786		;105071/+;8397/+(F)	1114		;105071/tub80ts;8397/MZ0709 (F)	939
; tub80.ts/+;MZ0709/+(F)	759		;105071/+;8397/+(F)	774.333		;105071/tub80ts;8397/MZ0709 (F)	696		; tub80.ts/+;MZ0709/+(F)	852.5		;105071/+;8397/+(F)	803		;105071/tub80ts;8397/MZ0709 (F)	865
; tub80.ts/+;MZ0709/+(F)	941.667		;105071/+;8397/+(F)	777.667		;105071/tub80ts;8397/MZ0709 (F)	946		; tub80.ts/+;MZ0709/+(F)	828.5		;105071/+;8397/+(F)	991.5		;105071/tub80ts;8397/MZ0709 (F)	917.5
; tub80.ts/+;MZ0709/+(F)	975		;105071/+;8397/+(F)	1022.33		;105071/tub80ts;8397/MZ0709 (F)	979.667		; tub80.ts/+;MZ0709/+(F)	699		;105071/+;8397/+(F)	1197		;105071/tub80ts;8397/MZ0709 (F)	1012.5
; tub80.ts/+;MZ0709/+(F)	1022.33		;105071/+;8397/+(F)	1027.33		;105071/tub80ts;8397/MZ0709 (F)	1021		; tub80.ts/+;MZ0709/+(F)	720.5		;105071/+;8397/+(F)	1159		;105071/tub80ts;8397/MZ0709 (F)	881
; tub80.ts/+;MZ0709/+(F)	857		;105071/+;8397/+(F)	1085.33		;105071/tub80ts;8397/MZ0709 (F)	1012.33		; tub80.ts/+;MZ0709/+(F)	647.5		;105071/+;8397/+(F)	1219.5		;105071/tub80ts;8397/MZ0709 (F)	928.5
; tub80.ts/+;MZ0709/+(F)	876.667		;105071/+;8397/+(F)	1136.33		;105071/tub80ts;8397/MZ0709 (F)	926		; tub80.ts/+;MZ0709/+(F)	552.5		;105071/+;8397/+(F)	1140.5		;105071/tub80ts;8397/MZ0709 (F)	842.5
; tub80.ts/+;MZ0709/+(F)	942.667		;105071/+;8397/+(F)	980		;105071/tub80ts;8397/MZ0709 (F)	944.333		; tub80.ts/+;MZ0709/+(F)	895.5		;105071/+;8397/+(F)	1115.5		;105071/tub80ts;8397/MZ0709 (F)	708.5
; tub80.ts/+;MZ0709/+(F)	1090		;105071/+;8397/+(F)	922.667		;105071/tub80ts;8397/MZ0709 (F)	817.667		; tub80.ts/+;MZ0709/+(F)	1007		;105071/+;8397/+(F)	1214.5		;105071/tub80ts;8397/MZ0709 (F)	1141.5
; tub80.ts/+;MZ0709/+(F)	858.333		;105071/+;8397/+(F)	933.667		;105071/tub80ts;8397/MZ0709 (F)	1044.67		; tub80.ts/+;MZ0709/+(F)	413		;105071/+;8397/+(F)	968		;105071/tub80ts;8397/MZ0709 (F)	985.5
; tub80.ts/+;MZ0709/+(F)	966.333		;105071/+;8397/+(F)	764.667		;105071/tub80ts;8397/MZ0709 (F)	891		; tub80.ts/+;MZ0709/+(F)	876		;105071/+;8397/+(F)	1153		;105071/tub80ts;8397/MZ0709 (F)	887.5
; tub80.ts/+;MZ0709/+(F)	1080.67		;105071/+;8397/+(F)	1076.67		;105071/tub80ts;8397/MZ0709 (F)	948.667		; tub80.ts/+;MZ0709/+(F)	940.5		;105071/+;8397/+(F)	1238		;105071/tub80ts;8397/MZ0709 (F)	970
; tub80.ts/+;MZ0709/+(F)	875.667		;105071/+;8397/+(F)	812		;105071/tub80ts;8397/MZ0709 (F)	918		; tub80.ts/+;MZ0709/+(F)	723.5		;105071/+;8397/+(F)	807.5		;105071/tub80ts;8397/MZ0709 (F)	984.5
; tub80.ts/+;MZ0709/+(F)	1030		;105071/+;8397/+(F)	819.667		;105071/tub80ts;8397/MZ0709 (F)	1023		; tub80.ts/+;MZ0709/+(F)	985		;105071/+;8397/+(F)	1140		;105071/tub80ts;8397/MZ0709 (F)	956
; tub80.ts/+;MZ0709/+(F)	1081.5		;105071/+;8397/+(F)	833		;105071/tub80ts;8397/MZ0709 (F)	880.667		; tub80.ts/+;MZ0709/+(F)	872		;105071/+;8397/+(F)	1063		;105071/tub80ts;8397/MZ0709 (F)	938
; tub80.ts/+;MZ0709/+(F)	826.667		;105071/+;8397/+(F)	878.667		;105071/tub80ts;8397/MZ0709 (F)	917.333		; tub80.ts/+;MZ0709/+(F)	901		;105071/+;8397/+(F)	1020		;105071/tub80ts;8397/MZ0709 (F)	1048.5
; tub80.ts/+;MZ0709/+(F)	785.333		;105071/+;8397/+(F)	909.667		;105071/tub80ts;8397/MZ0709 (F)	954.333					;105071/+;8397/+(F)	1068		;105071/tub80ts;8397/MZ0709 (F)	873
			;105071/+;8397/+(F)	882.333		;105071/tub80ts;8397/MZ0709 (F)	929.333
;NP2222G4/+;tub80.ts/+(F)	858.5		;105071/+;8397/+(F)	1022.25		; 105071/NP2222G4;8397/tub80.ts(F)	996.75		;NP2222G4/+;tub80.ts/+(F)	931.5		;105071/+;8397/+(F)	1204.5		; 105071/NP2222G4;8397/tub80.ts(F)	1213
;NP2222G4/+;tub80.ts/+(F)	878.5		;105071/+;8397/+(F)	987.5		; 105071/NP2222G4;8397/tub80.ts(F)	1053.75		;NP2222G4/+;tub80.ts/+(F)	1016.5		;105071/+;8397/+(F)	1051.5		; 105071/NP2222G4;8397/tub80.ts(F)	1164.5
;NP2222G4/+;tub80.ts/+(F)	877.25		;105071/+;8397/+(F)	760.25		; 105071/NP2222G4;8397/tub80.ts(F)	855		;NP2222G4/+;tub80.ts/+(F)	951.5		;105071/+;8397/+(F)	1060.5		; 105071/NP2222G4;8397/tub80.ts(F)	1164
;NP2222G4/+;tub80.ts/+(F)	830.75		;105071/+;8397/+(F)	885.75		; 105071/NP2222G4;8397/tub80.ts(F)	894.25		;NP2222G4/+;tub80.ts/+(F)	1044		;105071/+;8397/+(F)	1108		; 105071/NP2222G4;8397/tub80.ts(F)	1094
;NP2222G4/+;tub80.ts/+(F)	564		;105071/+;8397/+(F)	931.5		; 105071/NP2222G4;8397/tub80.ts(F)	1016		;NP2222G4/+;tub80.ts/+(F)	715		;105071/+;8397/+(F)	1159		; 105071/NP2222G4;8397/tub80.ts(F)	1244
;NP2222G4/+;tub80.ts/+(F)	837		;105071/+;8397/+(F)	807.25		; 105071/NP2222G4;8397/tub80.ts(F)	918.25		;NP2222G4/+;tub80.ts/+(F)	1067.5		;105071/+;8397/+(F)	1192.5		; 105071/NP2222G4;8397/tub80.ts(F)	1061.5
;NP2222G4/+;tub80.ts/+(F)	888.25		;105071/+;8397/+(F)	882.25		; 105071/NP2222G4;8397/tub80.ts(F)	1027.75		;NP2222G4/+;tub80.ts/+(F)	1121		;105071/+;8397/+(F)	1205		; 105071/NP2222G4;8397/tub80.ts(F)	1193.5
;NP2222G4/+;tub80.ts/+(F)	729.5		;105071/+;8397/+(F)	865.25		; 105071/NP2222G4;8397/tub80.ts(F)	988.75		;NP2222G4/+;tub80.ts/+(F)	956.5		;105071/+;8397/+(F)	1104.5		; 105071/NP2222G4;8397/tub80.ts(F)	1188.5
;NP2222G4/+;tub80.ts/+(F)	764		;105071/+;8397/+(F)	824		; 105071/NP2222G4;8397/tub80.ts(F)	779.5		;NP2222G4/+;tub80.ts/+(F)	848.5		;105071/+;8397/+(F)	1160.5		; 105071/NP2222G4;8397/tub80.ts(F)	944.5
;NP2222G4/+;tub80.ts/+(F)	788.5		;105071/+;8397/+(F)	841.25		; 105071/NP2222G4;8397/tub80.ts(F)	828		;NP2222G4/+;tub80.ts/+(F)	992		;105071/+;8397/+(F)	1198.5		; 105071/NP2222G4;8397/tub80.ts(F)	1003
;NP2222G4/+;tub80.ts/+(F)	846		;105071/+;8397/+(F)	732.25		; 105071/NP2222G4;8397/tub80.ts(F)	918.25		;NP2222G4/+;tub80.ts/+(F)	1086		;105071/+;8397/+(F)	1137.5		; 105071/NP2222G4;8397/tub80.ts(F)	1242.5
;NP2222G4/+;tub80.ts/+(F)	992.25		;105071/+;8397/+(F)	990.75		; 105071/NP2222G4;8397/tub80.ts(F)	895.75		;NP2222G4/+;tub80.ts/+(F)	966.5		;105071/+;8397/+(F)			; 105071/NP2222G4;8397/tub80.ts(F)	1214
;NP2222G4/+;tub80.ts/+(F)	908.25		;105071/+;8397/+(F)	887.75		; 105071/NP2222G4;8397/tub80.ts(F)	942.75		;NP2222G4/+;tub80.ts/+(F)	997.5		;105071/+;8397/+(F)	1140.5		; 105071/NP2222G4;8397/tub80.ts(F)	1035
;NP2222G4/+;tub80.ts/+(F)	683.25		;105071/+;8397/+(F)	864.75		; 105071/NP2222G4;8397/tub80.ts(F)	947.5		;NP2222G4/+;tub80.ts/+(F)	874		;105071/+;8397/+(F)	1114		; 105071/NP2222G4;8397/tub80.ts(F)	1229
;NP2222G4/+;tub80.ts/+(F)	973		;105071/+;8397/+(F)	1057.25		; 105071/NP2222G4;8397/tub80.ts(F)	834.75		;NP2222G4/+;tub80.ts/+(F)	1061		;105071/+;8397/+(F)	1245		; 105071/NP2222G4;8397/tub80.ts(F)	1105.5
;NP2222G4/+;tub80.ts/+(F)	957.75		;105071/+;8397/+(F)	987.5		; 105071/NP2222G4;8397/tub80.ts(F)	876		;NP2222G4/+;tub80.ts/+(F)	1166		;105071/+;8397/+(F)	1267		; 105071/NP2222G4;8397/tub80.ts(F)	1006
;NP2222G4/+;tub80.ts/+(F)	731		;105071/+;8397/+(F)	748.333		; 105071/NP2222G4;8397/tub80.ts(F)	1013.33		;NP2222G4/+;tub80.ts/+(F)	955.5		;105071/+;8397/+(F)	943		; 105071/NP2222G4;8397/tub80.ts(F)	1008
;NP2222G4/+;tub80.ts/+(F)	764		;105071/+;8397/+(F)	880.667		; 105071/NP2222G4;8397/tub80.ts(F)	964.667		;NP2222G4/+;tub80.ts/+(F)	594		;105071/+;8397/+(F)	1028		; 105071/NP2222G4;8397/tub80.ts(F)	968.5
;NP2222G4/+;tub80.ts/+(F)	845.667		;105071/+;8397/+(F)	707.667		; 105071/NP2222G4;8397/tub80.ts(F)	860.333		;NP2222G4/+;tub80.ts/+(F)	823		;105071/+;8397/+(F)	833.5		; 105071/NP2222G4;8397/tub80.ts(F)	974
;NP2222G4/+;tub80.ts/+(F)	867.667		;105071/+;8397/+(F)	938.667		; 105071/NP2222G4;8397/tub80.ts(F)	939		;NP2222G4/+;tub80.ts/+(F)	689.5		;105071/+;8397/+(F)	1062.5		; 105071/NP2222G4;8397/tub80.ts(F)	951.5
;NP2222G4/+;tub80.ts/+(F)	736.667		;105071/+;8397/+(F)	915		; 105071/NP2222G4;8397/tub80.ts(F)	862.667		;NP2222G4/+;tub80.ts/+(F)	713		;105071/+;8397/+(F)	1010.5		; 105071/NP2222G4;8397/tub80.ts(F)	1134
;NP2222G4/+;tub80.ts/+(F)	867		;105071/+;8397/+(F)	871.333		; 105071/NP2222G4;8397/tub80.ts(F)	847.333		;NP2222G4/+;tub80.ts/+(F)	899		;105071/+;8397/+(F)	993.5		; 105071/NP2222G4;8397/tub80.ts(F)	903
;NP2222G4/+;tub80.ts/+(F)	908		;105071/+;8397/+(F)	935		; 105071/NP2222G4;8397/tub80.ts(F)	955.333		;NP2222G4/+;tub80.ts/+(F)	789.5		;105071/+;8397/+(F)	1160.5		; 105071/NP2222G4;8397/tub80.ts(F)	1236
;NP2222G4/+;tub80.ts/+(F)	734.333		;105071/+;8397/+(F)	955		; 105071/NP2222G4;8397/tub80.ts(F)	982.667		;NP2222G4/+;tub80.ts/+(F)	991.5		;105071/+;8397/+(F)	1005.5		; 105071/NP2222G4;8397/tub80.ts(F)	913.5
;NP2222G4/+;tub80.ts/+(F)	866.333		;105071/+;8397/+(F)	740		; 105071/NP2222G4;8397/tub80.ts(F)	838.667		;NP2222G4/+;tub80.ts/+(F)	750		;105071/+;8397/+(F)	975.5		; 105071/NP2222G4;8397/tub80.ts(F)	960.5
;NP2222G4/+;tub80.ts/+(F)	794.333		;105071/+;8397/+(F)	841.333		; 105071/NP2222G4;8397/tub80.ts(F)	858		;NP2222G4/+;tub80.ts/+(F)	842		;105071/+;8397/+(F)	1030		; 105071/NP2222G4;8397/tub80.ts(F)	1078.5
;NP2222G4/+;tub80.ts/+(F)	774.333		;105071/+;8397/+(F)	628.667		; 105071/NP2222G4;8397/tub80.ts(F)	732.667		;NP2222G4/+;tub80.ts/+(F)	1065.5		;105071/+;8397/+(F)	745.5		; 105071/NP2222G4;8397/tub80.ts(F)	942.5
;NP2222G4/+;tub80.ts/+(F)	827.333		;105071/+;8397/+(F)	788		; 105071/NP2222G4;8397/tub80.ts(F)	923.667		;NP2222G4/+;tub80.ts/+(F)	963.5		;105071/+;8397/+(F)	909		; 105071/NP2222G4;8397/tub80.ts(F)	1103.5
;NP2222G4/+;tub80.ts/+(F)	751		;105071/+;8397/+(F)	648.333		; 105071/NP2222G4;8397/tub80.ts(F)	998.333		;NP2222G4/+;tub80.ts/+(F)	713.5		;105071/+;8397/+(F)	804		; 105071/NP2222G4;8397/tub80.ts(F)	1088.5
;NP2222G4/+;tub80.ts/+(F)	772.333		;105071/+;8397/+(F)	874		; 105071/NP2222G4;8397/tub80.ts(F)	912		;NP2222G4/+;tub80.ts/+(F)	674.5		;105071/+;8397/+(F)	1004.5		; 105071/NP2222G4;8397/tub80.ts(F)	1004
;NP2222G4/+;tub80.ts/+(F)	786		;105071/+;8397/+(F)	657.333		; 105071/NP2222G4;8397/tub80.ts(F)	946.667		;NP2222G4/+;tub80.ts/+(F)	611		;105071/+;8397/+(F)	817.5		; 105071/NP2222G4;8397/tub80.ts(F)	1138
;NP2222G4/+;tub80.ts/+(F)	802.333		;105071/+;8397/+(F)	774.333		; 105071/NP2222G4;8397/tub80.ts(F)	939.667		;NP2222G4/+;tub80.ts/+(F)	658		;105071/+;8397/+(F)	1114		; 105071/NP2222G4;8397/tub80.ts(F)	916.5
;NP2222G4/+;tub80.ts/+(F)	932.333		;105071/+;8397/+(F)	777.667		; 105071/NP2222G4;8397/tub80.ts(F)	1008.33		;NP2222G4/+;tub80.ts/+(F)	1063		;105071/+;8397/+(F)	803		; 105071/NP2222G4;8397/tub80.ts(F)	1052.5
;NP2222G4/+;tub80.ts/+(F)	845.667		;105071/+;8397/+(F)	1022.33		; 105071/NP2222G4;8397/tub80.ts(F)	1030.67		;NP2222G4/+;tub80.ts/+(F)	915.5		;105071/+;8397/+(F)	991.5		; 105071/NP2222G4;8397/tub80.ts(F)	1072.5
;NP2222G4/+;tub80.ts/+(F)	832.667		;105071/+;8397/+(F)	1027.33		; 105071/NP2222G4;8397/tub80.ts(F)	1041.33		;NP2222G4/+;tub80.ts/+(F)	835		;105071/+;8397/+(F)	1197		; 105071/NP2222G4;8397/tub80.ts(F)	1186.5
;NP2222G4/+;tub80.ts/+(F)	784.333		;105071/+;8397/+(F)	1085.33		; 105071/NP2222G4;8397/tub80.ts(F)	949.667		;NP2222G4/+;tub80.ts/+(F)	991		;105071/+;8397/+(F)	1159		; 105071/NP2222G4;8397/tub80.ts(F)	1120.5
;NP2222G4/+;tub80.ts/+(F)	930.333		;105071/+;8397/+(F)	1136.33		; 105071/NP2222G4;8397/tub80.ts(F)	919.333		;NP2222G4/+;tub80.ts/+(F)	1207.5		;105071/+;8397/+(F)	1219.5		; 105071/NP2222G4;8397/tub80.ts(F)	997
;NP2222G4/+;tub80.ts/+(F)	793.333		;105071/+;8397/+(F)	980		; 105071/NP2222G4;8397/tub80.ts(F)	1008		;NP2222G4/+;tub80.ts/+(F)	851.5		;105071/+;8397/+(F)	1140.5		; 105071/NP2222G4;8397/tub80.ts(F)	1149.5
;NP2222G4/+;tub80.ts/+(F)	699.333		;105071/+;8397/+(F)	922.667		; 105071/NP2222G4;8397/tub80.ts(F)	1020.33		;NP2222G4/+;tub80.ts/+(F)	834		;105071/+;8397/+(F)	1115.5		; 105071/NP2222G4;8397/tub80.ts(F)	1226
;NP2222G4/+;tub80.ts/+(F)	985		;105071/+;8397/+(F)	933.667		; 105071/NP2222G4;8397/tub80.ts(F)	909		;NP2222G4/+;tub80.ts/+(F)	1021		;105071/+;8397/+(F)	1214.5		; 105071/NP2222G4;8397/tub80.ts(F)	903
;NP2222G4/+;tub80.ts/+(F)	619.333		;105071/+;8397/+(F)	764.667		; 105071/NP2222G4;8397/tub80.ts(F)	1134.33		;NP2222G4/+;tub80.ts/+(F)	663		;105071/+;8397/+(F)	968		; 105071/NP2222G4;8397/tub80.ts(F)	1165
;NP2222G4/+;tub80.ts/+(F)	753.333		;105071/+;8397/+(F)	1076.67		; 105071/NP2222G4;8397/tub80.ts(F)	1031		;NP2222G4/+;tub80.ts/+(F)	796.5		;105071/+;8397/+(F)	1153		; 105071/NP2222G4;8397/tub80.ts(F)	1061
;NP2222G4/+;tub80.ts/+(F)	829.667		;105071/+;8397/+(F)	812		; 105071/NP2222G4;8397/tub80.ts(F)	1079.33		;NP2222G4/+;tub80.ts/+(F)	1078		;105071/+;8397/+(F)	1238		; 105071/NP2222G4;8397/tub80.ts(F)	1240
;NP2222G4/+;tub80.ts/+(F)	933.667		;105071/+;8397/+(F)	819.667		; 105071/NP2222G4;8397/tub80.ts(F)	1027		;NP2222G4/+;tub80.ts/+(F)	1062.5		;105071/+;8397/+(F)	807.5		; 105071/NP2222G4;8397/tub80.ts(F)	1143.5
;NP2222G4/+;tub80.ts/+(F)	864		;105071/+;8397/+(F)	833		; 105071/NP2222G4;8397/tub80.ts(F)	1072.33		;NP2222G4/+;tub80.ts/+(F)	867.5		;105071/+;8397/+(F)	1140		; 105071/NP2222G4;8397/tub80.ts(F)	1134.5
;NP2222G4/+;tub80.ts/+(F)	744.333		;105071/+;8397/+(F)	878.667		; 105071/NP2222G4;8397/tub80.ts(F)	1032		;NP2222G4/+;tub80.ts/+(F)	918.5		;105071/+;8397/+(F)	1063		; 105071/NP2222G4;8397/tub80.ts(F)	1310.5
;NP2222G4/+;tub80.ts/+(F)	647		;105071/+;8397/+(F)	909.667		; 105071/NP2222G4;8397/tub80.ts(F)	936.667		;NP2222G4/+;tub80.ts/+(F)	440		;105071/+;8397/+(F)	1020		; 105071/NP2222G4;8397/tub80.ts(F)	1100
;NP2222G4/+;tub80.ts/+(F)	942		;105071/+;8397/+(F)	882.333		; 105071/NP2222G4;8397/tub80.ts(F)	766		;NP2222G4/+;tub80.ts/+(F)	856		;105071/+;8397/+(F)	1068		; 105071/NP2222G4;8397/tub80.ts(F)	958.5
; EaatG4/+; tub80.ts/+(F)	775.25		;105071/+;8397/+(F)	1022.25		;105071/EaatG4;8397/tub80.ts(F)	922.75		; EaatG4/+; tub80.ts/+(F)	875		;105071/+;8397/+(F)	1204.5		;105071/EaatG4;8397/tub80.ts(F)	1185.5
; EaatG4/+; tub80.ts/+(F)	756		;105071/+;8397/+(F)	987.5		;105071/EaatG4;8397/tub80.ts(F)	806		; EaatG4/+; tub80.ts/+(F)	994		;105071/+;8397/+(F)	1051.5		;105071/EaatG4;8397/tub80.ts(F)	1050
; EaatG4/+; tub80.ts/+(F)	547		;105071/+;8397/+(F)	760.25		;105071/EaatG4;8397/tub80.ts(F)	830.5		; EaatG4/+; tub80.ts/+(F)	724		;105071/+;8397/+(F)	1060.5		;105071/EaatG4;8397/tub80.ts(F)	1208
; EaatG4/+; tub80.ts/+(F)	770.5		;105071/+;8397/+(F)	885.75		;105071/EaatG4;8397/tub80.ts(F)	975.5		; EaatG4/+; tub80.ts/+(F)	1181		;105071/+;8397/+(F)	1108		;105071/EaatG4;8397/tub80.ts(F)	1152.5
; EaatG4/+; tub80.ts/+(F)	645.75		;105071/+;8397/+(F)	931.5		;105071/EaatG4;8397/tub80.ts(F)	886.25		; EaatG4/+; tub80.ts/+(F)	878		;105071/+;8397/+(F)	1159		;105071/EaatG4;8397/tub80.ts(F)	1084.5
; EaatG4/+; tub80.ts/+(F)	698.5		;105071/+;8397/+(F)	807.25		;105071/EaatG4;8397/tub80.ts(F)	1070		; EaatG4/+; tub80.ts/+(F)	1010		;105071/+;8397/+(F)	1192.5		;105071/EaatG4;8397/tub80.ts(F)	1157
; EaatG4/+; tub80.ts/+(F)	854.75		;105071/+;8397/+(F)	882.25		;105071/EaatG4;8397/tub80.ts(F)	939.5		; EaatG4/+; tub80.ts/+(F)	1025		;105071/+;8397/+(F)	1205		;105071/EaatG4;8397/tub80.ts(F)	992.5
; EaatG4/+; tub80.ts/+(F)	774.75		;105071/+;8397/+(F)	865.25		;105071/EaatG4;8397/tub80.ts(F)	540.5		; EaatG4/+; tub80.ts/+(F)	787.5		;105071/+;8397/+(F)	1104.5		;105071/EaatG4;8397/tub80.ts(F)	1110
; EaatG4/+; tub80.ts/+(F)	831.25		;105071/+;8397/+(F)	824		;105071/EaatG4;8397/tub80.ts(F)	701		; EaatG4/+; tub80.ts/+(F)	955		;105071/+;8397/+(F)	1160.5		;105071/EaatG4;8397/tub80.ts(F)	1151.5
; EaatG4/+; tub80.ts/+(F)	615.5		;105071/+;8397/+(F)	841.25		;105071/EaatG4;8397/tub80.ts(F)	906.75		; EaatG4/+; tub80.ts/+(F)	875.5		;105071/+;8397/+(F)	1198.5		;105071/EaatG4;8397/tub80.ts(F)	1169.5
; EaatG4/+; tub80.ts/+(F)	791.75		;105071/+;8397/+(F)	732.25		;105071/EaatG4;8397/tub80.ts(F)	822		; EaatG4/+; tub80.ts/+(F)	1083		;105071/+;8397/+(F)	1137.5		;105071/EaatG4;8397/tub80.ts(F)	1090
; EaatG4/+; tub80.ts/+(F)	654.75		;105071/+;8397/+(F)	990.75		;105071/EaatG4;8397/tub80.ts(F)	823.5		; EaatG4/+; tub80.ts/+(F)	891		;105071/+;8397/+(F)	1140.5		;105071/EaatG4;8397/tub80.ts(F)	987
; EaatG4/+; tub80.ts/+(F)	644.5		;105071/+;8397/+(F)	887.75		;105071/EaatG4;8397/tub80.ts(F)	809		; EaatG4/+; tub80.ts/+(F)	853.5		;105071/+;8397/+(F)	1114		;105071/EaatG4;8397/tub80.ts(F)	1165
; EaatG4/+; tub80.ts/+(F)	811.5		;105071/+;8397/+(F)	864.75		;105071/EaatG4;8397/tub80.ts(F)	962.5		; EaatG4/+; tub80.ts/+(F)	925		;105071/+;8397/+(F)	1245		;105071/EaatG4;8397/tub80.ts(F)	1074.5
; EaatG4/+; tub80.ts/+(F)	744.5		;105071/+;8397/+(F)	1057.25		;105071/EaatG4;8397/tub80.ts(F)	951		; EaatG4/+; tub80.ts/+(F)	1045		;105071/+;8397/+(F)	1267		;105071/EaatG4;8397/tub80.ts(F)	1090
; EaatG4/+; tub80.ts/+(F)	616.25		;105071/+;8397/+(F)	987.5		;105071/EaatG4;8397/tub80.ts(F)	683		; EaatG4/+; tub80.ts/+(F)	694.5		;105071/+;8397/+(F)	943		;105071/EaatG4;8397/tub80.ts(F)	1079
; EaatG4/+; tub80.ts/+(F)	787.333		;105071/+;8397/+(F)	748.333		;105071/EaatG4;8397/tub80.ts(F)	793.333		; EaatG4/+; tub80.ts/+(F)	573		;105071/+;8397/+(F)	1028		;105071/EaatG4;8397/tub80.ts(F)	740.5
; EaatG4/+; tub80.ts/+(F)	816		;105071/+;8397/+(F)	880.667		;105071/EaatG4;8397/tub80.ts(F)	723		; EaatG4/+; tub80.ts/+(F)	855		;105071/+;8397/+(F)	833.5		;105071/EaatG4;8397/tub80.ts(F)	849.5
; EaatG4/+; tub80.ts/+(F)	706.333		;105071/+;8397/+(F)	707.667		;105071/EaatG4;8397/tub80.ts(F)	838		; EaatG4/+; tub80.ts/+(F)	723		;105071/+;8397/+(F)	1062.5		;105071/EaatG4;8397/tub80.ts(F)	549.5
; EaatG4/+; tub80.ts/+(F)	753		;105071/+;8397/+(F)	938.667		;105071/EaatG4;8397/tub80.ts(F)	625.333		; EaatG4/+; tub80.ts/+(F)	792.5		;105071/+;8397/+(F)	1010.5		;105071/EaatG4;8397/tub80.ts(F)	923.5
; EaatG4/+; tub80.ts/+(F)	815		;105071/+;8397/+(F)	915		;105071/EaatG4;8397/tub80.ts(F)	773.333		; EaatG4/+; tub80.ts/+(F)	546		;105071/+;8397/+(F)	993.5		;105071/EaatG4;8397/tub80.ts(F)	900.5
; EaatG4/+; tub80.ts/+(F)	1004.67		;105071/+;8397/+(F)	871.333		;105071/EaatG4;8397/tub80.ts(F)	796.667		; EaatG4/+; tub80.ts/+(F)	477.5		;105071/+;8397/+(F)	1160.5		;105071/EaatG4;8397/tub80.ts(F)	382.5
; EaatG4/+; tub80.ts/+(F)	688		;105071/+;8397/+(F)	935		;105071/EaatG4;8397/tub80.ts(F)	576		; EaatG4/+; tub80.ts/+(F)	688.5		;105071/+;8397/+(F)	1005.5		;105071/EaatG4;8397/tub80.ts(F)	438.5
; EaatG4/+; tub80.ts/+(F)	735.333		;105071/+;8397/+(F)	955		;105071/EaatG4;8397/tub80.ts(F)	770		; EaatG4/+; tub80.ts/+(F)	626		;105071/+;8397/+(F)	975.5		;105071/EaatG4;8397/tub80.ts(F)	942.5
; EaatG4/+; tub80.ts/+(F)	737		;105071/+;8397/+(F)	740		;105071/EaatG4;8397/tub80.ts(F)	646.667		; EaatG4/+; tub80.ts/+(F)	670		;105071/+;8397/+(F)	1030		;105071/EaatG4;8397/tub80.ts(F)	189
; EaatG4/+; tub80.ts/+(F)	703		;105071/+;8397/+(F)	841.333		;105071/EaatG4;8397/tub80.ts(F)	982		; EaatG4/+; tub80.ts/+(F)	446.5		;105071/+;8397/+(F)	745.5		;105071/EaatG4;8397/tub80.ts(F)	915
; EaatG4/+; tub80.ts/+(F)	747		;105071/+;8397/+(F)	628.667		;105071/EaatG4;8397/tub80.ts(F)	864		; EaatG4/+; tub80.ts/+(F)	845.5		;105071/+;8397/+(F)	909		;105071/EaatG4;8397/tub80.ts(F)	971
; EaatG4/+; tub80.ts/+(F)	754		;105071/+;8397/+(F)	788		;105071/EaatG4;8397/tub80.ts(F)	867.333		; EaatG4/+; tub80.ts/+(F)	605.5		;105071/+;8397/+(F)	804		;105071/EaatG4;8397/tub80.ts(F)	957
; EaatG4/+; tub80.ts/+(F)	670.667		;105071/+;8397/+(F)	648.333		;105071/EaatG4;8397/tub80.ts(F)	628.667		; EaatG4/+; tub80.ts/+(F)	1162.5		;105071/+;8397/+(F)	1004.5		;105071/EaatG4;8397/tub80.ts(F)	332
; EaatG4/+; tub80.ts/+(F)	978		;105071/+;8397/+(F)	874		;105071/EaatG4;8397/tub80.ts(F)	686		; EaatG4/+; tub80.ts/+(F)	576		;105071/+;8397/+(F)	817.5		;105071/EaatG4;8397/tub80.ts(F)	813.5
; EaatG4/+; tub80.ts/+(F)	730.333		;105071/+;8397/+(F)	657.333		;105071/EaatG4;8397/tub80.ts(F)	748		; EaatG4/+; tub80.ts/+(F)	875.5		;105071/+;8397/+(F)	1114		;105071/EaatG4;8397/tub80.ts(F)	591.5
; EaatG4/+; tub80.ts/+(F)	871.667		;105071/+;8397/+(F)	774.333		;105071/EaatG4;8397/tub80.ts(F)	778		; EaatG4/+; tub80.ts/+(F)	766.5		;105071/+;8397/+(F)	803		;105071/EaatG4;8397/tub80.ts(F)	850.5
; EaatG4/+; tub80.ts/+(F)	795		;105071/+;8397/+(F)	777.667		;105071/EaatG4;8397/tub80.ts(F)	836		; EaatG4/+; tub80.ts/+(F)	607		;105071/+;8397/+(F)	991.5		;105071/EaatG4;8397/tub80.ts(F)	864
; EaatG4/+; tub80.ts/+(F)	860.333		;105071/+;8397/+(F)	1022.33		;105071/EaatG4;8397/tub80.ts(F)	716.333		; EaatG4/+; tub80.ts/+(F)	584		;105071/+;8397/+(F)	1197		;105071/EaatG4;8397/tub80.ts(F)	799
; EaatG4/+; tub80.ts/+(F)	900.667		;105071/+;8397/+(F)	1027.33		;105071/EaatG4;8397/tub80.ts(F)	792.667		; EaatG4/+; tub80.ts/+(F)	610		;105071/+;8397/+(F)	1159		;105071/EaatG4;8397/tub80.ts(F)	1002
; EaatG4/+; tub80.ts/+(F)	710.667		;105071/+;8397/+(F)	1085.33		;105071/EaatG4;8397/tub80.ts(F)	704		; EaatG4/+; tub80.ts/+(F)	804.5		;105071/+;8397/+(F)	1219.5		;105071/EaatG4;8397/tub80.ts(F)	857.5
; EaatG4/+; tub80.ts/+(F)	827		;105071/+;8397/+(F)	1136.33		;105071/EaatG4;8397/tub80.ts(F)	895		; EaatG4/+; tub80.ts/+(F)	678		;105071/+;8397/+(F)	1140.5		;105071/EaatG4;8397/tub80.ts(F)	821.5
; EaatG4/+; tub80.ts/+(F)	884.333		;105071/+;8397/+(F)	980		;105071/EaatG4;8397/tub80.ts(F)	572.667		; EaatG4/+; tub80.ts/+(F)	438		;105071/+;8397/+(F)	1115.5		;105071/EaatG4;8397/tub80.ts(F)	657
; EaatG4/+; tub80.ts/+(F)	588.667		;105071/+;8397/+(F)	922.667		;105071/EaatG4;8397/tub80.ts(F)	861		; EaatG4/+; tub80.ts/+(F)	627.5		;105071/+;8397/+(F)	1214.5		;105071/EaatG4;8397/tub80.ts(F)	832
; EaatG4/+; tub80.ts/+(F)	729		;105071/+;8397/+(F)	933.667		;105071/EaatG4;8397/tub80.ts(F)	903		; EaatG4/+; tub80.ts/+(F)	711		;105071/+;8397/+(F)	968		;105071/EaatG4;8397/tub80.ts(F)	954
; EaatG4/+; tub80.ts/+(F)	757.333		;105071/+;8397/+(F)	764.667		;105071/EaatG4;8397/tub80.ts(F)	881		; EaatG4/+; tub80.ts/+(F)	910.5		;105071/+;8397/+(F)	1153		;105071/EaatG4;8397/tub80.ts(F)	1041
; EaatG4/+; tub80.ts/+(F)	866.667		;105071/+;8397/+(F)	1076.67		;105071/EaatG4;8397/tub80.ts(F)	867		; EaatG4/+; tub80.ts/+(F)	673.5		;105071/+;8397/+(F)	1238		;105071/EaatG4;8397/tub80.ts(F)	1199.5
; EaatG4/+; tub80.ts/+(F)	956.333		;105071/+;8397/+(F)	812		;105071/EaatG4;8397/tub80.ts(F)	1110.67		; EaatG4/+; tub80.ts/+(F)	845		;105071/+;8397/+(F)	807.5		;105071/EaatG4;8397/tub80.ts(F)	1211.5
; EaatG4/+; tub80.ts/+(F)	799.333		;105071/+;8397/+(F)	819.667		;105071/EaatG4;8397/tub80.ts(F)	873.667		; EaatG4/+; tub80.ts/+(F)	529.5		;105071/+;8397/+(F)	1140		;105071/EaatG4;8397/tub80.ts(F)	743.5
; EaatG4/+; tub80.ts/+(F)	747		;105071/+;8397/+(F)	833		;105071/EaatG4;8397/tub80.ts(F)	880		; EaatG4/+; tub80.ts/+(F)	668		;105071/+;8397/+(F)	1063		;105071/EaatG4;8397/tub80.ts(F)	1037
; EaatG4/+; tub80.ts/+(F)	732		;105071/+;8397/+(F)	878.667		;105071/EaatG4;8397/tub80.ts(F)	738.333		; EaatG4/+; tub80.ts/+(F)	650		;105071/+;8397/+(F)	1020		;105071/EaatG4;8397/tub80.ts(F)	624.5
; EaatG4/+; tub80.ts/+(F)	788.333		;105071/+;8397/+(F)	909.667		;105071/EaatG4;8397/tub80.ts(F)	895.667		; EaatG4/+; tub80.ts/+(F)	900		;105071/+;8397/+(F)	1068		;105071/EaatG4;8397/tub80.ts(F)	1004
; EaatG4/+; tub80.ts/+(F)	757.333		;105071/+;8397/+(F)	882.333		;105071/EaatG4;8397/tub80.ts(F)	773								;105071/EaatG4;8397/tub80.ts(F)	1086
