# Supplementary material for: Modulation of sleep by trafficking of lipids through the Drosophila blood-brain barrier
Source: eLife. 2023 May 4;12:e86336. doi: 10.7554/eLife.86336 (PMC10205086; doi:10.7554/eLife.86336)
Supplement: Figure 3—source data 1. [file elife-86336-fig3-data1.xlsx]

## Sheet: Sheet1
GAL4 Control	Total Sleep		UAS Control	Total Sleep		GAL4 x UAS	Total Sleep
;;repo G4/+ (F)	856.5		;105071/+;8397/+ (F)	795.5		;105071/+;8397/repo G4 (F)	919.5
;;repo G4/+ (F)	1110.75		;105071/+;8397/+ (F)	701.5		;105071/+;8397/repo G4 (F)	975.25
;;repo G4/+ (F)	849.75		;105071/+;8397/+ (F)	774.25		;105071/+;8397/repo G4 (F)	976.25
;;repo G4/+ (F)	749.5		;105071/+;8397/+ (F)	946		;105071/+;8397/repo G4 (F)	964
;;repo G4/+ (F)	874.75		;105071/+;8397/+ (F)	814		;105071/+;8397/repo G4 (F)	1190.75
;;repo G4/+ (F)	947.5		;105071/+;8397/+ (F)	807		;105071/+;8397/repo G4 (F)	976
;;repo G4/+ (F)	838.5		;105071/+;8397/+ (F)	824.75		;105071/+;8397/repo G4 (F)	973
;;repo G4/+ (F)	751.5		;105071/+;8397/+ (F)	718.5		;105071/+;8397/repo G4 (F)	930.25
;;repo G4/+ (F)	722.75		;105071/+;8397/+ (F)	1019.75		;105071/+;8397/repo G4 (F)	1036.75
;;repo G4/+ (F)	772		;105071/+;8397/+ (F)	977.25		;105071/+;8397/repo G4 (F)	1031
;;repo G4/+ (F)	747		;105071/+;8397/+ (F)	1198.25		;105071/+;8397/repo G4 (F)	931
;;repo G4/+ (F)	738.75		;105071/+;8397/+ (F)	1060.75		;105071/+;8397/repo G4 (F)	943.75
;;repo G4/+ (F)	680.25		;105071/+;8397/+ (F)	654.5		;105071/+;8397/repo G4 (F)	981.75
;;repo G4/+ (F)	927		;105071/+;8397/+ (F)	656.75		;105071/+;8397/repo G4 (F)	816
;;repo G4/+ (F)	1046.25		;105071/+;8397/+ (F)	851.25		;105071/+;8397/repo G4 (F)	965.75
;;repo G4/+ (F)	985.75		;105071/+;8397/+ (F)	740.75		;105071/+;8397/repo G4 (F)	765.5
;;repo G4/+ (F)	832		;105071/+;8397/+ (F)	741.75		;105071/+;8397/repo G4 (F)	900.75
;;repo G4/+ (F)	670.75		;105071/+;8397/+ (F)	889.25		;105071/+;8397/repo G4 (F)	1002.5
;;repo G4/+ (F)	1039.5		;105071/+;8397/+ (F)	873.25		;105071/+;8397/repo G4 (F)	895.25
;;repo G4/+ (F)	956.75		;105071/+;8397/+ (F)	731.5		;105071/+;8397/repo G4 (F)	902.75
;;repo G4/+ (F)	900.25		;105071/+;8397/+ (F)	600.75		;105071/+;8397/repo G4 (F)	879.25
;;repo G4/+ (F)	887		;105071/+;8397/+ (F)	847.75		;105071/+;8397/repo G4 (F)	900
;;repo G4/+ (F)	872.75		;105071/+;8397/+ (F)	887.75		;105071/+;8397/repo G4 (F)	882.25
;;repo G4/+ (F)	889.5		;105071/+;8397/+ (F)	772.75		;105071/+;8397/repo G4 (F)	940.75
;;repo G4/+ (F)	1006.5		;105071/+;8397/+ (F)	910.75		;105071/+;8397/repo G4 (F)	900
;;repo G4/+ (F)	826		;105071/+;8397/+ (F)	956.25		;105071/+;8397/repo G4 (F)	918
;;repo G4/+ (F)	802		;105071/+;8397/+ (F)	755.75		;105071/+;8397/repo G4 (F)	973
;;repo G4/+ (F)	649.25		;105071/+;8397/+ (F)	621.25		;105071/+;8397/repo G4 (F)	887.75
;;repo G4/+ (F)	1013.25		;105071/+;8397/+ (F)	856		;105071/+;8397/repo G4 (F)	973.5
;;repo G4/+ (F)	901.25		;105071/+;8397/+ (F)	772		;105071/+;8397/repo G4 (F)	1008
;;repo G4/+ (F)	813		;105071/+;8397/+ (F)	875.5		;105071/+;8397/repo G4 (F)	903.25
;;repo G4/+ (F)	915.5		;105071/+;8397/+ (F)	875		;105071/+;8397/repo G4 (F)	1091.75
;;repo G4/+ (F)	523.5		;105071/+;8397/+ (F)	954.25		;105071/+;8397/repo G4 (F)	741.25
;;repo G4/+ (F)	717.75		;105071/+;8397/+ (F)	983.75		;105071/+;8397/repo G4 (F)	1033.25
;;repo G4/+ (F)	498.75		;105071/+;8397/+ (F)	913.5		;105071/+;8397/repo G4 (F)	985.75
;;repo G4/+ (F)	919.75		;105071/+;8397/+ (F)	805.25		;105071/+;8397/repo G4 (F)	921
;;repo G4/+ (F)	677		;105071/+;8397/+ (F)	807		;105071/+;8397/repo G4 (F)	902
;;repo G4/+ (F)	949.75		;105071/+;8397/+ (F)	874		;105071/+;8397/repo G4 (F)	926.25
;;repo G4/+ (F)	1005.5		;105071/+;8397/+ (F)	735		;105071/+;8397/repo G4 (F)	957.25
;;repo G4/+ (F)	850.5		;105071/+;8397/+ (F)	948		;105071/+;8397/repo G4 (F)	831
;;repo G4/+ (F)	860.5		;105071/+;8397/+ (F)	943		;105071/+;8397/repo G4 (F)	907
;;repo G4/+ (F)	675.25		;105071/+;8397/+ (F)	770		;105071/+;8397/repo G4 (F)	929
;;repo G4/+ (F)	691		;105071/+;8397/+ (F)	924.5		;105071/+;8397/repo G4 (F)	992.75
;;repo G4/+ (F)	847		;105071/+;8397/+ (F)	860.5
;;repo G4/+ (F)	863.25		;105071/+;8397/+ (F)	910.25
;;repo G4/+ (F)	625.75		;105071/+;8397/+ (F)	874
;;repo G4/+ (F)	986.25		;105071/+;8397/+ (F)	737.5
;;repo G4/+ (F)	937.75
;NP6293 G4/+; (F)	832		;105071/+;8397/+ (F)	742.667		;105071/NP6293 G4;8397/+ (F)	1000
;NP6293 G4/+; (F)	838		;105071/+;8397/+ (F)	866		;105071/NP6293 G4;8397/+ (F)	776.667
;NP6293 G4/+; (F)	941.667		;105071/+;8397/+ (F)	928		;105071/NP6293 G4;8397/+ (F)	925.667
;NP6293 G4/+; (F)	939		;105071/+;8397/+ (F)	796		;105071/NP6293 G4;8397/+ (F)	979.667
;NP6293 G4/+; (F)	972.667		;105071/+;8397/+ (F)	875.333		;105071/NP6293 G4;8397/+ (F)	927
;NP6293 G4/+; (F)	864.333		;105071/+;8397/+ (F)	951.333		;105071/NP6293 G4;8397/+ (F)	974.667
;NP6293 G4/+; (F)	655		;105071/+;8397/+ (F)	665.667		;105071/NP6293 G4;8397/+ (F)	861.333
;NP6293 G4/+; (F)	850		;105071/+;8397/+ (F)	845		;105071/NP6293 G4;8397/+ (F)	975.667
;NP6293 G4/+; (F)	690.667		;105071/+;8397/+ (F)	752.333		;105071/NP6293 G4;8397/+ (F)	930
;NP6293 G4/+; (F)	828.667		;105071/+;8397/+ (F)	806.333		;105071/NP6293 G4;8397/+ (F)	916
;NP6293 G4/+; (F)	917.667		;105071/+;8397/+ (F)	990		;105071/NP6293 G4;8397/+ (F)	871.333
;NP6293 G4/+; (F)	763.667		;105071/+;8397/+ (F)	859.333		;105071/NP6293 G4;8397/+ (F)	906
;NP6293 G4/+; (F)	781.333		;105071/+;8397/+ (F)	759.333		;105071/NP6293 G4;8397/+ (F)	840
;NP6293 G4/+; (F)	741.333		;105071/+;8397/+ (F)	737.667		;105071/NP6293 G4;8397/+ (F)	794
;NP6293 G4/+; (F)	821.333		;105071/+;8397/+ (F)	810.667		;105071/NP6293 G4;8397/+ (F)	918
;NP6293 G4/+; (F)	898.333		;105071/+;8397/+ (F)	916		;105071/NP6293 G4;8397/+ (F)	950
;NP6293 G4/+; (F)	1058		;105071/+;8397/+ (F)	762		;105071/NP6293 G4;8397/+ (F)	715.5
;NP6293 G4/+; (F)	951		;105071/+;8397/+ (F)	894		;105071/NP6293 G4;8397/+ (F)	869
;NP6293 G4/+; (F)	855.5		;105071/+;8397/+ (F)	939		;105071/NP6293 G4;8397/+ (F)	882
;NP6293 G4/+; (F)	976.5		;105071/+;8397/+ (F)	960.5		;105071/NP6293 G4;8397/+ (F)	929
;NP6293 G4/+; (F)	582.5		;105071/+;8397/+ (F)	881.5		;105071/NP6293 G4;8397/+ (F)	982
;NP6293 G4/+; (F)	727		;105071/+;8397/+ (F)	1046.5		;105071/NP6293 G4;8397/+ (F)	730
;NP6293 G4/+; (F)	864		;105071/+;8397/+ (F)	721.5		;105071/NP6293 G4;8397/+ (F)	1044
;NP6293 G4/+; (F)	704.5		;105071/+;8397/+ (F)	899.5		;105071/NP6293 G4;8397/+ (F)	897.5
;NP6293 G4/+; (F)	832.5		;105071/+;8397/+ (F)	785.5		;105071/NP6293 G4;8397/+ (F)	922.5
;NP6293 G4/+; (F)	872		;105071/+;8397/+ (F)	791.5		;105071/NP6293 G4;8397/+ (F)	1036
;NP6293 G4/+; (F)	697.5		;105071/+;8397/+ (F)	775		;105071/NP6293 G4;8397/+ (F)	893.5
;NP6293 G4/+; (F)	823		;105071/+;8397/+ (F)	773.5		;105071/NP6293 G4;8397/+ (F)	853.5
;NP6293 G4/+; (F)	707.5		;105071/+;8397/+ (F)	811.5		;105071/NP6293 G4;8397/+ (F)	985
;NP6293 G4/+; (F)	968.5		;105071/+;8397/+ (F)	820.5
;NP6293 G4/+; (F)	997.5		;105071/+;8397/+ (F)	576.5
;NP6293 G4/+; (F)	690		;105071/+;8397/+ (F)	894
;moody G4/+; (F)	853		;105071/+;8397/+ (F)	742.667		;105071/moody G4;8397/+ (F)	853.667
;moody G4/+; (F)	1004.67		;105071/+;8397/+ (F)	866		;105071/moody G4;8397/+ (F)	774.667
;moody G4/+; (F)	1029.33		;105071/+;8397/+ (F)	928		;105071/moody G4;8397/+ (F)	788.667
;moody G4/+; (F)	790.667		;105071/+;8397/+ (F)	796		;105071/moody G4;8397/+ (F)	881.667
;moody G4/+; (F)	900		;105071/+;8397/+ (F)	875.333		;105071/moody G4;8397/+ (F)	821.667
;moody G4/+; (F)	935.333		;105071/+;8397/+ (F)	951.333		;105071/moody G4;8397/+ (F)	882.333
;moody G4/+; (F)	942.333		;105071/+;8397/+ (F)	665.667		;105071/moody G4;8397/+ (F)	869.333
;moody G4/+; (F)	1006.33		;105071/+;8397/+ (F)	845		;105071/moody G4;8397/+ (F)	769
;moody G4/+; (F)	991.667		;105071/+;8397/+ (F)	752.333		;105071/moody G4;8397/+ (F)	674
;moody G4/+; (F)	908.333		;105071/+;8397/+ (F)	806.333		;105071/moody G4;8397/+ (F)	872.667
;moody G4/+; (F)	892.667		;105071/+;8397/+ (F)	990		;105071/moody G4;8397/+ (F)	898.667
;moody G4/+; (F)	915.667		;105071/+;8397/+ (F)	859.333		;105071/moody G4;8397/+ (F)	1047
;moody G4/+; (F)	946.333		;105071/+;8397/+ (F)	759.333		;105071/moody G4;8397/+ (F)	940.667
;moody G4/+; (F)	793.333		;105071/+;8397/+ (F)	737.667		;105071/moody G4;8397/+ (F)	917
;moody G4/+; (F)	826		;105071/+;8397/+ (F)	810.667		;105071/moody G4;8397/+ (F)	868
;moody G4/+; (F)	892.667		;105071/+;8397/+ (F)	916		;105071/moody G4;8397/+ (F)	873.333
;moody G4/+; (F)	915.333		;105071/+;8397/+ (F)	692.333		;105071/moody G4;8397/+ (F)	981.333
;moody G4/+; (F)	1003.33		;105071/+;8397/+ (F)	692.667		;105071/moody G4;8397/+ (F)	1007.33
;moody G4/+; (F)	707		;105071/+;8397/+ (F)	736.333		;105071/moody G4;8397/+ (F)	967
;moody G4/+; (F)	699.333		;105071/+;8397/+ (F)	612.667		;105071/moody G4;8397/+ (F)	957.333
;moody G4/+; (F)	930.667		;105071/+;8397/+ (F)	678.333		;105071/moody G4;8397/+ (F)	988
;moody G4/+; (F)	1022.67		;105071/+;8397/+ (F)	693		;105071/moody G4;8397/+ (F)	1021.67
;moody G4/+; (F)	861		;105071/+;8397/+ (F)	705		;105071/moody G4;8397/+ (F)	982.333
;moody G4/+; (F)	1001		;105071/+;8397/+ (F)	742.333		;105071/moody G4;8397/+ (F)	1015
;moody G4/+; (F)	713		;105071/+;8397/+ (F)	1012.33		;105071/moody G4;8397/+ (F)	863.333
;moody G4/+; (F)	797.333		;105071/+;8397/+ (F)	826.333		;105071/moody G4;8397/+ (F)	1053
;moody G4/+; (F)	946.667		;105071/+;8397/+ (F)	680		;105071/moody G4;8397/+ (F)	852
;moody G4/+; (F)	839.333		;105071/+;8397/+ (F)	970.333		;105071/moody G4;8397/+ (F)	1014.67
;moody G4/+; (F)	825.667		;105071/+;8397/+ (F)	765		;105071/moody G4;8397/+ (F)	844.333
;moody G4/+; (F)	713.333		;105071/+;8397/+ (F)	819		;105071/moody G4;8397/+ (F)	962.667
;moody G4/+; (F)	748.667		;105071/+;8397/+ (F)	682.667		;105071/moody G4;8397/+ (F)	941.333
;moody G4/+; (F)	856		;105071/+;8397/+ (F)	960		;105071/moody G4;8397/+ (F)	904
;moody G4/+; (F)	1026.67		;105071/+;8397/+ (F)	814.667		;105071/moody G4;8397/+ (F)	839.333
;moody G4/+; (F)	919.667		;105071/+;8397/+ (F)	903		;105071/moody G4;8397/+ (F)	790
;moody G4/+; (F)	761.667		;105071/+;8397/+ (F)	951.667		;105071/moody G4;8397/+ (F)	799.333
;moody G4/+; (F)	929.667		;105071/+;8397/+ (F)	973		;105071/moody G4;8397/+ (F)	867
;moody G4/+; (F)	1076.67		;105071/+;8397/+ (F)	902.333		;105071/moody G4;8397/+ (F)	809
;moody G4/+; (F)	1092		;105071/+;8397/+ (F)	1070.33		;105071/moody G4;8397/+ (F)	788
;moody G4/+; (F)	919.667		;105071/+;8397/+ (F)	738.667		;105071/moody G4;8397/+ (F)	929.333
;moody G4/+; (F)	744.333		;105071/+;8397/+ (F)	916		;105071/moody G4;8397/+ (F)	906.667
;moody G4/+; (F)	1031.67		;105071/+;8397/+ (F)	790.667		;105071/moody G4;8397/+ (F)	699
;moody G4/+; (F)	849		;105071/+;8397/+ (F)	831.333		;105071/moody G4;8397/+ (F)	913.333
;moody G4/+; (F)	883		;105071/+;8397/+ (F)	774		;105071/moody G4;8397/+ (F)	692
;moody G4/+; (F)	801		;105071/+;8397/+ (F)	801.667		;105071/moody G4;8397/+ (F)	828.667
;moody G4/+; (F)	819.333		;105071/+;8397/+ (F)	825.333		;105071/moody G4;8397/+ (F)	710.667
;moody G4/+; (F)	967		;105071/+;8397/+ (F)	797.333		;105071/moody G4;8397/+ (F)	899
;moody G4/+; (F)	874.333		;105071/+;8397/+ (F)	623		;105071/moody G4;8397/+ (F)	907
;moody G4/+; (F)	898.667		;105071/+;8397/+ (F)	859.333
;;Rab9 G4/+ (F)	837.333		;105071/+;8397/+ (F)	742.667		;105071/+;8397/Rab9 G4 (F)	894.667
;;Rab9 G4/+ (F)	1064.33		;105071/+;8397/+ (F)	866		;105071/+;8397/Rab9 G4 (F)	780.333
;;Rab9 G4/+ (F)	1065		;105071/+;8397/+ (F)	928		;105071/+;8397/Rab9 G4 (F)	839.333
;;Rab9 G4/+ (F)	827		;105071/+;8397/+ (F)	796		;105071/+;8397/Rab9 G4 (F)	884.333
;;Rab9 G4/+ (F)	1156		;105071/+;8397/+ (F)	875.333		;105071/+;8397/Rab9 G4 (F)	785.333
;;Rab9 G4/+ (F)	969.333		;105071/+;8397/+ (F)	951.333		;105071/+;8397/Rab9 G4 (F)	765
;;Rab9 G4/+ (F)	1059.33		;105071/+;8397/+ (F)	665.667		;105071/+;8397/Rab9 G4 (F)	832.333
;;Rab9 G4/+ (F)	939		;105071/+;8397/+ (F)	845		;105071/+;8397/Rab9 G4 (F)	899.333
;;Rab9 G4/+ (F)	921		;105071/+;8397/+ (F)	752.333		;105071/+;8397/Rab9 G4 (F)	780
;;Rab9 G4/+ (F)	820		;105071/+;8397/+ (F)	806.333		;105071/+;8397/Rab9 G4 (F)	808
;;Rab9 G4/+ (F)	1006.33		;105071/+;8397/+ (F)	990		;105071/+;8397/Rab9 G4 (F)	979
;;Rab9 G4/+ (F)	983.333		;105071/+;8397/+ (F)	859.333		;105071/+;8397/Rab9 G4 (F)	856.333
;;Rab9 G4/+ (F)	1060.33		;105071/+;8397/+ (F)	759.333		;105071/+;8397/Rab9 G4 (F)	953.333
;;Rab9 G4/+ (F)	1026.33		;105071/+;8397/+ (F)	737.667		;105071/+;8397/Rab9 G4 (F)	744
;;Rab9 G4/+ (F)	826.667		;105071/+;8397/+ (F)	810.667		;105071/+;8397/Rab9 G4 (F)	524
;;Rab9 G4/+ (F)	1026.67		;105071/+;8397/+ (F)	916		;105071/+;8397/Rab9 G4 (F)	1062
;;Rab9 G4/+ (F)	987.333		;105071/+;8397/+ (F)	704.667		;105071/+;8397/Rab9 G4 (F)	642.667
;;Rab9 G4/+ (F)	1154		;105071/+;8397/+ (F)	873.333		;105071/+;8397/Rab9 G4 (F)	843.667
;;Rab9 G4/+ (F)	723		;105071/+;8397/+ (F)	884		;105071/+;8397/Rab9 G4 (F)	935.333
;;Rab9 G4/+ (F)	1022.33		;105071/+;8397/+ (F)	971		;105071/+;8397/Rab9 G4 (F)	879.333
;;Rab9 G4/+ (F)	939.667		;105071/+;8397/+ (F)	1061.67		;105071/+;8397/Rab9 G4 (F)	615.333
;;Rab9 G4/+ (F)	1104		;105071/+;8397/+ (F)	858		;105071/+;8397/Rab9 G4 (F)	874.333
;;Rab9 G4/+ (F)	825.333		;105071/+;8397/+ (F)	945.667		;105071/+;8397/Rab9 G4 (F)	932.333
;;Rab9 G4/+ (F)	1018		;105071/+;8397/+ (F)	864.333		;105071/+;8397/Rab9 G4 (F)	909.333
;;Rab9 G4/+ (F)	1035.67		;105071/+;8397/+ (F)	620		;105071/+;8397/Rab9 G4 (F)	795.333
;;Rab9 G4/+ (F)	822		;105071/+;8397/+ (F)	793.333		;105071/+;8397/Rab9 G4 (F)	794
;;Rab9 G4/+ (F)	1136.33		;105071/+;8397/+ (F)	819.333		;105071/+;8397/Rab9 G4 (F)	518
;;Rab9 G4/+ (F)	1065.33		;105071/+;8397/+ (F)	850.667		;105071/+;8397/Rab9 G4 (F)	648.333
;;Rab9 G4/+ (F)	1090.33		;105071/+;8397/+ (F)	947.333		;105071/+;8397/Rab9 G4 (F)	797.333
;;Rab9 G4/+ (F)	842.667		;105071/+;8397/+ (F)	969.333		;105071/+;8397/Rab9 G4 (F)	923.667
;;Rab9 G4/+ (F)	792.333		;105071/+;8397/+ (F)	949.667		;105071/+;8397/Rab9 G4 (F)	1044.67
;;Rab9 G4/+ (F)	715		;105071/+;8397/+ (F)	868.667		;105071/+;8397/Rab9 G4 (F)	971.667
;;Rab9 G4/+ (F)	971		;105071/+;8397/+ (F)	1034		;105071/+;8397/Rab9 G4 (F)	927
;;Rab9 G4/+ (F)	1041.67		;105071/+;8397/+ (F)	1022.33		;105071/+;8397/Rab9 G4 (F)	723
;;Rab9 G4/+ (F)	981.333		;105071/+;8397/+ (F)	830		;105071/+;8397/Rab9 G4 (F)	764.333
;;Rab9 G4/+ (F)	944.667		;105071/+;8397/+ (F)	971		;105071/+;8397/Rab9 G4 (F)	964.333
;;Rab9 G4/+ (F)	907.333		;105071/+;8397/+ (F)	931.667		;105071/+;8397/Rab9 G4 (F)	1104
;;Rab9 G4/+ (F)	691.667		;105071/+;8397/+ (F)	876.667		;105071/+;8397/Rab9 G4 (F)	922.667
;;Rab9 G4/+ (F)	922.333		;105071/+;8397/+ (F)	974.667		;105071/+;8397/Rab9 G4 (F)	1018.67
;;Rab9 G4/+ (F)	878.333		;105071/+;8397/+ (F)	770		;105071/+;8397/Rab9 G4 (F)	947
;;Rab9 G4/+ (F)	954.667		;105071/+;8397/+ (F)	855		;105071/+;8397/Rab9 G4 (F)	988.333
;;Rab9 G4/+ (F)	863		;105071/+;8397/+ (F)	935.667		;105071/+;8397/Rab9 G4 (F)	825.667
;;Rab9 G4/+ (F)	869		;105071/+;8397/+ (F)	731.667		;105071/+;8397/Rab9 G4 (F)	833.333
;;Rab9 G4/+ (F)	851		;105071/+;8397/+ (F)	986		;105071/+;8397/Rab9 G4 (F)	964.667
;;Rab9 G4/+ (F)	1038.33		;105071/+;8397/+ (F)	854.333		;105071/+;8397/Rab9 G4 (F)	870
;;Rab9 G4/+ (F)	955		;105071/+;8397/+ (F)	873.333		;105071/+;8397/Rab9 G4 (F)	962.333
;;Rab9 G4/+ (F)	834.333		;105071/+;8397/+ (F)	949		;105071/+;8397/Rab9 G4 (F)	691
;;Rab9 G4/+ (F)	960.667		;105071/+;8397/+ (F)	833.333		;105071/+;8397/Rab9 G4 (F)	801
;;Rab9 G4/+ (F)	1085		;105071/+;8397/+ (F)	814.333		;105071/+;8397/Rab9 G4 (F)	1046.67
;;Rab9 G4/+ (F)	1114		;105071/+;8397/+ (F)	894.667		;105071/+;8397/Rab9 G4 (F)	1079
;;Rab9 G4/+ (F)	959		;105071/+;8397/+ (F)	572.333		;105071/+;8397/Rab9 G4 (F)	655.333
;;Rab9 G4/+ (F)	830		;105071/+;8397/+ (F)	961		;105071/+;8397/Rab9 G4 (F)	981.333
;;Rab9 G4/+ (F)	844.667		;105071/+;8397/+ (F)	873.333		;105071/+;8397/Rab9 G4 (F)	740.667
;;Rab9 G4/+ (F)	1081		;105071/+;8397/+ (F)	875.333		;105071/+;8397/Rab9 G4 (F)	757.667
;;Rab9 G4/+ (F)	960		;105071/+;8397/+ (F)	676		;105071/+;8397/Rab9 G4 (F)	1002.67
;;Rab9 G4/+ (F)	973		;105071/+;8397/+ (F)	968.667		;105071/+;8397/Rab9 G4 (F)	809.667
;;Rab9 G4/+ (F)	1044.67		;105071/+;8397/+ (F)	817		;105071/+;8397/Rab9 G4 (F)	1014.33
;;Rab9 G4/+ (F)	1021.67		;105071/+;8397/+ (F)	651.333		;105071/+;8397/Rab9 G4 (F)	1213.67
;;Rab9 G4/+ (F)	931		;105071/+;8397/+ (F)	975		;105071/+;8397/Rab9 G4 (F)	957.333
;;Rab9 G4/+ (F)	1070.33		;105071/+;8397/+ (F)	1102.33		;105071/+;8397/Rab9 G4 (F)	890.667
;;Rab9 G4/+ (F)	857		;105071/+;8397/+ (F)	928.667		;105071/+;8397/Rab9 G4 (F)	994
;;Rab9 G4/+ (F)	1054		;105071/+;8397/+ (F)	780
;;Rab9 G4/+ (F)	935		;105071/+;8397/+ (F)	563.333
;;Rab9 G4/+ (F)	702.667		;105071/+;8397/+ (F)	905.333

## Sheet: Sheet2
PG+SPG>Mgl/Lrp1 RNAi at 31 degree
GAL4 tub80 ts Control	Total sleep		UAS Control	Total sleep		GAL4 tub80 ts x UAS	Total sleep
;9-137 G4/+;tub80.ts/+ (F)	725		;105071/+; 8397/+ (F)	884		;105071/9-137 G4;8397/tub80.ts(F)	967
;9-137 G4/+;tub80.ts/+ (F)	428		;105071/+; 8397/+ (F)	850		;105071/9-137 G4;8397/tub80.ts(F)	1039
;9-137 G4/+;tub80.ts/+ (F)	653		;105071/+; 8397/+ (F)	716		;105071/9-137 G4;8397/tub80.ts(F)	965
;9-137 G4/+;tub80.ts/+ (F)	709		;105071/+; 8397/+ (F)	991		;105071/9-137 G4;8397/tub80.ts(F)	827
;9-137 G4/+;tub80.ts/+ (F)	772		;105071/+; 8397/+ (F)	586		;105071/9-137 G4;8397/tub80.ts(F)	1096
;9-137 G4/+;tub80.ts/+ (F)	585		;105071/+; 8397/+ (F)	903		;105071/9-137 G4;8397/tub80.ts(F)	991
;9-137 G4/+;tub80.ts/+ (F)	733		;105071/+; 8397/+ (F)	968		;105071/9-137 G4;8397/tub80.ts(F)	1303
;9-137 G4/+;tub80.ts/+ (F)	706		;105071/+; 8397/+ (F)	833		;105071/9-137 G4;8397/tub80.ts(F)	1048
;9-137 G4/+;tub80.ts/+ (F)	886		;105071/+; 8397/+ (F)	825		;105071/9-137 G4;8397/tub80.ts(F)	825
;9-137 G4/+;tub80.ts/+ (F)	964		;105071/+; 8397/+ (F)	795		;105071/9-137 G4;8397/tub80.ts(F)	1056
;9-137 G4/+;tub80.ts/+ (F)	721		;105071/+; 8397/+ (F)	1144		;105071/9-137 G4;8397/tub80.ts(F)	1142
;9-137 G4/+;tub80.ts/+ (F)	762		;105071/+; 8397/+ (F)	661		;105071/9-137 G4;8397/tub80.ts(F)	1014
;9-137 G4/+;tub80.ts/+ (F)	895		;105071/+; 8397/+ (F)	680		;105071/9-137 G4;8397/tub80.ts(F)	915
;9-137 G4/+;tub80.ts/+ (F)	887		;105071/+; 8397/+ (F)	980		;105071/9-137 G4;8397/tub80.ts(F)	856
;9-137 G4/+;tub80.ts/+ (F)	1024		;105071/+; 8397/+ (F)	938		;105071/9-137 G4;8397/tub80.ts(F)	936
;9-137 G4/+;tub80.ts/+ (F)	909		;105071/+; 8397/+ (F)	979		;105071/9-137 G4;8397/tub80.ts(F)	877
;9-137 G4/+;tub80.ts/+ (F)	979		;105071/+; 8397/+ (F)	1025		;105071/9-137 G4;8397/tub80.ts(F)	1018
;9-137 G4/+;tub80.ts/+ (F)	906		;105071/+; 8397/+ (F)	963		;105071/9-137 G4;8397/tub80.ts(F)	1010
;9-137 G4/+;tub80.ts/+ (F)	1063		;105071/+; 8397/+ (F)	1142		;105071/9-137 G4;8397/tub80.ts(F)	1177
;9-137 G4/+;tub80.ts/+ (F)	870		;105071/+; 8397/+ (F)	908		;105071/9-137 G4;8397/tub80.ts(F)	1073
;9-137 G4/+;tub80.ts/+ (F)	1045		;105071/+; 8397/+ (F)	1072		;105071/9-137 G4;8397/tub80.ts(F)	1009
;9-137 G4/+;tub80.ts/+ (F)	922		;105071/+; 8397/+ (F)	1034		;105071/9-137 G4;8397/tub80.ts(F)	1126
;9-137 G4/+;tub80.ts/+ (F)	929		;105071/+; 8397/+ (F)	1150		;105071/9-137 G4;8397/tub80.ts(F)	1000
;9-137 G4/+;tub80.ts/+ (F)	919		;105071/+; 8397/+ (F)	887		;105071/9-137 G4;8397/tub80.ts(F)	1129
;9-137 G4/+;tub80.ts/+ (F)	828		;105071/+; 8397/+ (F)	1101		;105071/9-137 G4;8397/tub80.ts(F)	1167
;9-137 G4/+;tub80.ts/+ (F)	822		;105071/+; 8397/+ (F)	1090		;105071/9-137 G4;8397/tub80.ts(F)	1101
;9-137 G4/+;tub80.ts/+ (F)	922.5		;105071/+; 8397/+ (F)	1124		;105071/9-137 G4;8397/tub80.ts(F)	1204
;9-137 G4/+;tub80.ts/+ (F)	618.5		;105071/+; 8397/+ (F)	996		;105071/9-137 G4;8397/tub80.ts(F)	987
;9-137 G4/+;tub80.ts/+ (F)	680.5		;105071/+; 8397/+ (F)	955		;105071/9-137 G4;8397/tub80.ts(F)	1193
;9-137 G4/+;tub80.ts/+ (F)	660.5		;105071/+; 8397/+ (F)	1098		;105071/9-137 G4;8397/tub80.ts(F)	1068
;9-137 G4/+;tub80.ts/+ (F)	895		;105071/+; 8397/+ (F)	972		;105071/9-137 G4;8397/tub80.ts(F)	1094
;9-137 G4/+;tub80.ts/+ (F)	727		;105071/+; 8397/+ (F)	1087		;105071/9-137 G4;8397/tub80.ts(F)	906
;9-137 G4/+;tub80.ts/+ (F)	797		;105071/+; 8397/+ (F)	831.5		;105071/9-137 G4;8397/tub80.ts(F)	928.5
;9-137 G4/+;tub80.ts/+ (F)	658.5		;105071/+; 8397/+ (F)	729.5		;105071/9-137 G4;8397/tub80.ts(F)	1144.5
;9-137 G4/+;tub80.ts/+ (F)	562.5		;105071/+; 8397/+ (F)	558.5		;105071/9-137 G4;8397/tub80.ts(F)	1038
;9-137 G4/+;tub80.ts/+ (F)	822		;105071/+; 8397/+ (F)	762		;105071/9-137 G4;8397/tub80.ts(F)	913
;9-137 G4/+;tub80.ts/+ (F)	738		;105071/+; 8397/+ (F)	944		;105071/9-137 G4;8397/tub80.ts(F)	873.5
;9-137 G4/+;tub80.ts/+ (F)	938.5		;105071/+; 8397/+ (F)	868.5		;105071/9-137 G4;8397/tub80.ts(F)	982
;9-137 G4/+;tub80.ts/+ (F)	905.5		;105071/+; 8397/+ (F)	690.5		;105071/9-137 G4;8397/tub80.ts(F)	1038
			;105071/+; 8397/+ (F)	946		;105071/9-137 G4;8397/tub80.ts(F)	1060.5
			;105071/+; 8397/+ (F)	1149.5		;105071/9-137 G4;8397/tub80.ts(F)	864
			;105071/+; 8397/+ (F)	540		;105071/9-137 G4;8397/tub80.ts(F)	945.5
			;105071/+; 8397/+ (F)	1049		;105071/9-137 G4;8397/tub80.ts(F)	953.5
			;105071/+; 8397/+ (F)	1113		;105071/9-137 G4;8397/tub80.ts(F)	1034
			;105071/+; 8397/+ (F)	975		;105071/9-137 G4;8397/tub80.ts(F)	1029
			;105071/+; 8397/+ (F)	852		;105071/9-137 G4;8397/tub80.ts(F)	949.5
						;105071/9-137 G4;8397/tub80.ts(F)	975
;9-137 G4/+;tub80.ts/+ (F)	737.5		;36389/+; 8397/+ (F)	633.5		;36389/9-137 G4;8397/tub80.ts(F)	1018.5
;9-137 G4/+;tub80.ts/+ (F)	938		;36389/+; 8397/+ (F)	920.5		;36389/9-137 G4;8397/tub80.ts(F)	865.5
;9-137 G4/+;tub80.ts/+ (F)	958.5		;36389/+; 8397/+ (F)	848.5		;36389/9-137 G4;8397/tub80.ts(F)	1041.5
;9-137 G4/+;tub80.ts/+ (F)	756		;36389/+; 8397/+ (F)	1104.5		;36389/9-137 G4;8397/tub80.ts(F)	842.5
;9-137 G4/+;tub80.ts/+ (F)	1087.5		;36389/+; 8397/+ (F)	697.5		;36389/9-137 G4;8397/tub80.ts(F)	1149.5
;9-137 G4/+;tub80.ts/+ (F)	956		;36389/+; 8397/+ (F)	560		;36389/9-137 G4;8397/tub80.ts(F)	912
;9-137 G4/+;tub80.ts/+ (F)	776		;36389/+; 8397/+ (F)	435		;36389/9-137 G4;8397/tub80.ts(F)	928.5
;9-137 G4/+;tub80.ts/+ (F)	993.5		;36389/+; 8397/+ (F)	667		;36389/9-137 G4;8397/tub80.ts(F)	507
;9-137 G4/+;tub80.ts/+ (F)	1017		;36389/+; 8397/+ (F)	769		;36389/9-137 G4;8397/tub80.ts(F)	908
;9-137 G4/+;tub80.ts/+ (F)	445.5		;36389/+; 8397/+ (F)	1088.5		;36389/9-137 G4;8397/tub80.ts(F)	424.5
;9-137 G4/+;tub80.ts/+ (F)	803		;36389/+; 8397/+ (F)	925.5		;36389/9-137 G4;8397/tub80.ts(F)	1121.5
;9-137 G4/+;tub80.ts/+ (F)	466.5		;36389/+; 8397/+ (F)	438.5		;36389/9-137 G4;8397/tub80.ts(F)	803
;9-137 G4/+;tub80.ts/+ (F)	798.5		;36389/+; 8397/+ (F)	727		;36389/9-137 G4;8397/tub80.ts(F)	768
;9-137 G4/+;tub80.ts/+ (F)	990.5		;36389/+; 8397/+ (F)	653		;36389/9-137 G4;8397/tub80.ts(F)	881.5
;9-137 G4/+;tub80.ts/+ (F)	738		;36389/+; 8397/+ (F)	470		;36389/9-137 G4;8397/tub80.ts(F)	703.5
;9-137 G4/+;tub80.ts/+ (F)	694		;36389/+; 8397/+ (F)	625.5		;36389/9-137 G4;8397/tub80.ts(F)	884
;9-137 G4/+;tub80.ts/+ (F)	916.5		;36389/+; 8397/+ (F)	819.5		;36389/9-137 G4;8397/tub80.ts(F)	1038.5
;9-137 G4/+;tub80.ts/+ (F)	494		;36389/+; 8397/+ (F)	592		;36389/9-137 G4;8397/tub80.ts(F)	880.5
;9-137 G4/+;tub80.ts/+ (F)	597		;36389/+; 8397/+ (F)	981.5		;36389/9-137 G4;8397/tub80.ts(F)	919.5
;9-137 G4/+;tub80.ts/+ (F)	426.5					;36389/9-137 G4;8397/tub80.ts(F)	959.5
;9-137 G4/+;tub80.ts/+ (F)	715
;9-137 G4/+;tub80.ts/+ (F)	437
;9-137 G4/+;tub80.ts/+ (F)	592
;9-137 G4/+;tub80.ts/+ (F)	825
;9-137 G4/+;tub80.ts/+ (F)	847
;9-137 G4/+;tub80.ts/+ (F)	706
;9-137 G4/+;tub80.ts/+ (F)	610.5
;9-137 G4/+;tub80.ts/+ (F)	507
;9-137 G4/+;tub80.ts/+ (F)	703
;9-137 G4/+;tub80.ts/+ (F)	873.5
;9-137 G4/+;tub80.ts/+ (F)	586
;9-137 G4/+;tub80.ts/+ (F)	670.5
PG+SPG>Mgl/Lrp1 RNAi at 18 degree
;9-137 G4/+;tub80.ts/+ (F)	1009		;105071/+; 8397/+ (F)	957		;105071/9-137 G4;8397/tub80.ts(F)	862
;9-137 G4/+;tub80.ts/+ (F)	906		;105071/+; 8397/+ (F)	767		;105071/9-137 G4;8397/tub80.ts(F)	805
;9-137 G4/+;tub80.ts/+ (F)	973		;105071/+; 8397/+ (F)	784		;105071/9-137 G4;8397/tub80.ts(F)	993
;9-137 G4/+;tub80.ts/+ (F)	902		;105071/+; 8397/+ (F)	896		;105071/9-137 G4;8397/tub80.ts(F)	670
;9-137 G4/+;tub80.ts/+ (F)	1011		;105071/+; 8397/+ (F)	735		;105071/9-137 G4;8397/tub80.ts(F)	922
;9-137 G4/+;tub80.ts/+ (F)	880		;105071/+; 8397/+ (F)	870		;105071/9-137 G4;8397/tub80.ts(F)	902
;9-137 G4/+;tub80.ts/+ (F)	980		;105071/+; 8397/+ (F)	748		;105071/9-137 G4;8397/tub80.ts(F)	1141
;9-137 G4/+;tub80.ts/+ (F)	914		;105071/+; 8397/+ (F)	833		;105071/9-137 G4;8397/tub80.ts(F)	879
;9-137 G4/+;tub80.ts/+ (F)	753		;105071/+; 8397/+ (F)	840		;105071/9-137 G4;8397/tub80.ts(F)	947
;9-137 G4/+;tub80.ts/+ (F)	958		;105071/+; 8397/+ (F)	924		;105071/9-137 G4;8397/tub80.ts(F)	1052
;9-137 G4/+;tub80.ts/+ (F)	712		;105071/+; 8397/+ (F)	927		;105071/9-137 G4;8397/tub80.ts(F)	972
;9-137 G4/+;tub80.ts/+ (F)	813		;105071/+; 8397/+ (F)	616		;105071/9-137 G4;8397/tub80.ts(F)	900
;9-137 G4/+;tub80.ts/+ (F)	825		;105071/+; 8397/+ (F)	820		;105071/9-137 G4;8397/tub80.ts(F)	853
;9-137 G4/+;tub80.ts/+ (F)	822		;105071/+; 8397/+ (F)	833		;105071/9-137 G4;8397/tub80.ts(F)	826
;9-137 G4/+;tub80.ts/+ (F)	797		;105071/+; 8397/+ (F)	929		;105071/9-137 G4;8397/tub80.ts(F)	801
;9-137 G4/+;tub80.ts/+ (F)	781		;105071/+; 8397/+ (F)	940		;105071/9-137 G4;8397/tub80.ts(F)	941
;9-137 G4/+;tub80.ts/+ (F)	753		;105071/+; 8397/+ (F)	850		;105071/9-137 G4;8397/tub80.ts(F)	907
;9-137 G4/+;tub80.ts/+ (F)	770		;105071/+; 8397/+ (F)	832		;105071/9-137 G4;8397/tub80.ts(F)	794
;9-137 G4/+;tub80.ts/+ (F)	662		;105071/+; 8397/+ (F)	973		;105071/9-137 G4;8397/tub80.ts(F)	938
;9-137 G4/+;tub80.ts/+ (F)	939		;105071/+; 8397/+ (F)	898		;105071/9-137 G4;8397/tub80.ts(F)	929
;9-137 G4/+;tub80.ts/+ (F)	828		;105071/+; 8397/+ (F)	960		;105071/9-137 G4;8397/tub80.ts(F)	868
;9-137 G4/+;tub80.ts/+ (F)	946		;105071/+; 8397/+ (F)	785		;105071/9-137 G4;8397/tub80.ts(F)	857
;9-137 G4/+;tub80.ts/+ (F)	783		;105071/+; 8397/+ (F)	853		;105071/9-137 G4;8397/tub80.ts(F)	882
;9-137 G4/+;tub80.ts/+ (F)	728		;105071/+; 8397/+ (F)	830		;105071/9-137 G4;8397/tub80.ts(F)	1009
;9-137 G4/+;tub80.ts/+ (F)	717.333		;105071/+; 8397/+ (F)	930		;105071/9-137 G4;8397/tub80.ts(F)	1027
;9-137 G4/+;tub80.ts/+ (F)	897		;105071/+; 8397/+ (F)	855		;105071/9-137 G4;8397/tub80.ts(F)	982
;9-137 G4/+;tub80.ts/+ (F)	912.333		;105071/+; 8397/+ (F)	896		;105071/9-137 G4;8397/tub80.ts(F)	1060
;9-137 G4/+;tub80.ts/+ (F)	867.667		;105071/+; 8397/+ (F)	773		;105071/9-137 G4;8397/tub80.ts(F)	860
;9-137 G4/+;tub80.ts/+ (F)	866		;105071/+; 8397/+ (F)	771		;105071/9-137 G4;8397/tub80.ts(F)	994
;9-137 G4/+;tub80.ts/+ (F)	784		;105071/+; 8397/+ (F)	860		;105071/9-137 G4;8397/tub80.ts(F)	797
;9-137 G4/+;tub80.ts/+ (F)	636		;105071/+; 8397/+ (F)	876		;105071/9-137 G4;8397/tub80.ts(F)	961
;9-137 G4/+;tub80.ts/+ (F)	843		;105071/+; 8397/+ (F)	972		;105071/9-137 G4;8397/tub80.ts(F)	703
;9-137 G4/+;tub80.ts/+ (F)	779		;105071/+; 8397/+ (F)	862		;105071/9-137 G4;8397/tub80.ts(F)	798.667
;9-137 G4/+;tub80.ts/+ (F)	751.667		;105071/+; 8397/+ (F)	751.333		;105071/9-137 G4;8397/tub80.ts(F)	939.333
;9-137 G4/+;tub80.ts/+ (F)	628.667		;105071/+; 8397/+ (F)	818.667		;105071/9-137 G4;8397/tub80.ts(F)	837.667
;9-137 G4/+;tub80.ts/+ (F)	536.333		;105071/+; 8397/+ (F)	832.667		;105071/9-137 G4;8397/tub80.ts(F)	680
;9-137 G4/+;tub80.ts/+ (F)	709.333		;105071/+; 8397/+ (F)	951		;105071/9-137 G4;8397/tub80.ts(F)	607.667
;9-137 G4/+;tub80.ts/+ (F)	668.667		;105071/+; 8397/+ (F)	982.667		;105071/9-137 G4;8397/tub80.ts(F)	900.667
;9-137 G4/+;tub80.ts/+ (F)	701.667		;105071/+; 8397/+ (F)			;105071/9-137 G4;8397/tub80.ts(F)	932.667
;9-137 G4/+;tub80.ts/+ (F)	882.333		;105071/+; 8397/+ (F)	656.333		;105071/9-137 G4;8397/tub80.ts(F)	792.333
			;105071/+; 8397/+ (F)	782		;105071/9-137 G4;8397/tub80.ts(F)	553.333
			;105071/+; 8397/+ (F)	970		;105071/9-137 G4;8397/tub80.ts(F)	845
			;105071/+; 8397/+ (F)	778		;105071/9-137 G4;8397/tub80.ts(F)	876
			;105071/+; 8397/+ (F)	971.333		;105071/9-137 G4;8397/tub80.ts(F)	932.667
			;105071/+; 8397/+ (F)	1053.33		;105071/9-137 G4;8397/tub80.ts(F)	834
			;105071/+; 8397/+ (F)	869		;105071/9-137 G4;8397/tub80.ts(F)	814.667
			;105071/+; 8397/+ (F)	832		;105071/9-137 G4;8397/tub80.ts(F)	905
			;105071/+; 8397/+ (F)	1112.67
;9-137 G4/+;tub80.ts/+ (F)	995		;36389/+; 8397/+ (F)	878.5		;36389/9-137 G4;8397/tub80.ts(F)	482.5
;9-137 G4/+;tub80.ts/+ (F)	780		;36389/+; 8397/+ (F)	739.5		;36389/9-137 G4;8397/tub80.ts(F)	1081
;9-137 G4/+;tub80.ts/+ (F)	976.5		;36389/+; 8397/+ (F)	875.5		;36389/9-137 G4;8397/tub80.ts(F)	1006
;9-137 G4/+;tub80.ts/+ (F)	850		;36389/+; 8397/+ (F)	802		;36389/9-137 G4;8397/tub80.ts(F)	1058.5
;9-137 G4/+;tub80.ts/+ (F)	631		;36389/+; 8397/+ (F)	915.5		;36389/9-137 G4;8397/tub80.ts(F)	663
;9-137 G4/+;tub80.ts/+ (F)	723		;36389/+; 8397/+ (F)	699.5		;36389/9-137 G4;8397/tub80.ts(F)	796.5
;9-137 G4/+;tub80.ts/+ (F)	728.5		;36389/+; 8397/+ (F)	673		;36389/9-137 G4;8397/tub80.ts(F)	1109.5
;9-137 G4/+;tub80.ts/+ (F)	740		;36389/+; 8397/+ (F)	679		;36389/9-137 G4;8397/tub80.ts(F)	987
;9-137 G4/+;tub80.ts/+ (F)	784		;36389/+; 8397/+ (F)	710.5		;36389/9-137 G4;8397/tub80.ts(F)	807.5
;9-137 G4/+;tub80.ts/+ (F)	895		;36389/+; 8397/+ (F)	752.5		;36389/9-137 G4;8397/tub80.ts(F)	558.5
;9-137 G4/+;tub80.ts/+ (F)	875.5		;36389/+; 8397/+ (F)	846.5		;36389/9-137 G4;8397/tub80.ts(F)	597.5
;9-137 G4/+;tub80.ts/+ (F)	891		;36389/+; 8397/+ (F)	867		;36389/9-137 G4;8397/tub80.ts(F)	804
;9-137 G4/+;tub80.ts/+ (F)	669		;36389/+; 8397/+ (F)	753.5		;36389/9-137 G4;8397/tub80.ts(F)	873
;9-137 G4/+;tub80.ts/+ (F)	972.5		;36389/+; 8397/+ (F)	768		;36389/9-137 G4;8397/tub80.ts(F)	702
;9-137 G4/+;tub80.ts/+ (F)	1098.5		;36389/+; 8397/+ (F)	696		;36389/9-137 G4;8397/tub80.ts(F)	981.5
;9-137 G4/+;tub80.ts/+ (F)	746		;36389/+; 8397/+ (F)	879		;36389/9-137 G4;8397/tub80.ts(F)	771.5
;9-137 G4/+;tub80.ts/+ (F)	776		;36389/+; 8397/+ (F)	736.667		;36389/9-137 G4;8397/tub80.ts(F)	666
;9-137 G4/+;tub80.ts/+ (F)	754.667		;36389/+; 8397/+ (F)	905.333		;36389/9-137 G4;8397/tub80.ts(F)	705.333
;9-137 G4/+;tub80.ts/+ (F)	693.333		;36389/+; 8397/+ (F)	813.333		;36389/9-137 G4;8397/tub80.ts(F)	832
;9-137 G4/+;tub80.ts/+ (F)	665		;36389/+; 8397/+ (F)	700.667		;36389/9-137 G4;8397/tub80.ts(F)	849
;9-137 G4/+;tub80.ts/+ (F)	829.333		;36389/+; 8397/+ (F)	667.333		;36389/9-137 G4;8397/tub80.ts(F)	534.667
;9-137 G4/+;tub80.ts/+ (F)	684.667		;36389/+; 8397/+ (F)	900.667		;36389/9-137 G4;8397/tub80.ts(F)	641
;9-137 G4/+;tub80.ts/+ (F)	913		;36389/+; 8397/+ (F)	825		;36389/9-137 G4;8397/tub80.ts(F)	595.667
;9-137 G4/+;tub80.ts/+ (F)	645.333		;36389/+; 8397/+ (F)	1100.67		;36389/9-137 G4;8397/tub80.ts(F)	897.667
;9-137 G4/+;tub80.ts/+ (F)	563.333					;36389/9-137 G4;8397/tub80.ts(F)	876
;9-137 G4/+;tub80.ts/+ (F)	629					;36389/9-137 G4;8397/tub80.ts(F)	680.667
;9-137 G4/+;tub80.ts/+ (F)	705.333					;36389/9-137 G4;8397/tub80.ts(F)	971
;9-137 G4/+;tub80.ts/+ (F)	908.667					;36389/9-137 G4;8397/tub80.ts(F)	764.333
;9-137 G4/+;tub80.ts/+ (F)	729.667
;9-137 G4/+;tub80.ts/+ (F)	725
;9-137 G4/+;tub80.ts/+ (F)	794
;9-137 G4/+;tub80.ts/+ (F)	671.667
