# Supplementary material for: Modulation of sleep by trafficking of lipids through the Drosophila blood-brain barrier
Source: eLife. 2023 May 4;12:e86336. doi: 10.7554/eLife.86336 (PMC10205086; doi:10.7554/eLife.86336)
Supplement: Figure 4—figure supplement 1—source data 1. [file elife-86336-fig4-figsupp1-data1.xlsx]

## Sheet: Sheet1
GAL4 Control									UAS Control									GAL4 x UAS
	rD aLSE	rD aNSE	rN aLSE	rN aNSE	AI	rDS	rNS			rD aLSE	rD aNSE	rN aLSE	rN aNSE	AI	rDS	rNS			rD aLSE	rD aNSE	rN aLSE	rN aNSE	AI	rDS	rNS
;;repo G4/+	13.9148	17.6667	109.767	5.33333	1.58953	245.333	581.333		;106681/+;6782/+ (F)	38.1217	15	69.4167	9.66667	2.79462	430	605.333		;106681/+;6782/repo G4 (F)	29.0434	16.6667	150.722	8	1.84661	379.333	589.667
;;repo G4/+	2.62963	7	41.1013	13.3333	1.55738	19	543.667		;106681/+;6782/+ (F)	14.4955	22.3333	77.5139	9.33333	1.79999	315.333	576.333		;106681/+;6782/repo G4 (F)	39.8624	12.3333	240.739	10.3333	1.52606	376.667	576.667
;;repo G4/+	95.254	5.66667	249	2.66667	2.20902	453	639.333		;106681/+;6782/+ (F)	29.8706	14.3333	15.4128	27.6667	1.89024	372	421.333		;106681/+;6782/repo G4 (F)	13.5131	20.3333	74.6456	8.66667	1.77405	264.667	621.333
;;repo G4/+	43.1376	11.3333	96.1063	8.33333	1.20911	398.333	641.333		;106681/+;6782/+ (F)	8.44841	19.6667	45.8749	14.3333	1.61253	155.667	577.667		;106681/+;6782/repo G4 (F)	14.3251	25	91.9333	8.33333	1.88037	275.667	589.667
;;repo G4/+	25.7278	12.3333	72.0111	9.33333	1.53248	309	571		;106681/+;6782/+ (F)	9.56676	17.3333	35.1907	16.6667	1.72768	163.667	539		;106681/+;6782/repo G4 (F)	32.1881	18.6667	62.5582	10.6667	1.48771	463.333	584.333
;;repo G4/+	14.6359	19.6667	296.778	5.33333	1.39284	259	665		;106681/+;6782/+ (F)	28.7319	16.6667	49.5581	12.3333	1.66569	392.667	605.333		;106681/+;6782/repo G4 (F)	16.3706	19.3333	33.2447	16.6667	1.27272	315.333	494.667
;;repo G4/+	11.6817	19	62.4625	14.6667	1.66874	215.667	579.333		;106681/+;6782/+ (F)	44.8667	10.3333	45.0686	13.6667	1.46979	271.333	595.333		;106681/+;6782/repo G4 (F)	29.6415	21.6667	210.819	4.33333	1.90688	410.333	654.667
;;repo G4/+	20.1451	20.3333	88.0905	7.33333	1.66033	349.333	594.333		;106681/+;6782/+ (F)	14.4242	20.3333	267.111	2.66667	1.85335	255.667	686.667		;106681/+;6782/repo G4 (F)	27.1389	16.3333	138.528	6.33333	1.67377	417	610.333
;;repo G4/+	56.1593	8.66667	211.017	3.66667	1.65973	418.667	661.333		;106681/+;6782/+ (F)	11.0309	21	36.6904	17	1.59797	228.333	581		;106681/+;6782/repo G4 (F)	50.5393	10.6667	102.594	6.33333	2.11369	506	621.667
;;repo G4/+	19.2763	12	53.4476	14	1.2546	205.333	603		;106681/+;6782/+ (F)	46.7464	9.33333	146.678	9.66667	1.51818	392	638		;106681/+;6782/repo G4 (F)	27.4103	14.3333	128.689	5	1.81482	384.333	623
;;repo G4/+	11.8606	13.3333	120.984	9.66667	1.04374	142.333	598		;106681/+;6782/+ (F)	21.2333	18.3333	46.9167	13	2.03646	307.333	523.333		;106681/+;6782/repo G4 (F)	26.3361	17.3333	141.126	5.66667	1.87036	428.667	655.333
;;repo G4/+	6.5091	15.6667	32.0881	16	1.33515	102	492.333		;106681/+;6782/+ (F)	17.2862	17	26.7659	19.6667	1.5103	260.333	487.333		;106681/+;6782/repo G4 (F)	17.8877	18.6667	273.058	6.33333	1.50827	305.667	636
;;repo G4/+	54.0303	9	359.133	4.33333	1.53387	416.333	647.333		;106681/+;6782/+ (F)	26.5111	13.3333	33.2446	16.6667	2.06402	240	525.667		;106681/+;6782/repo G4 (F)	54.9405	7.33333	115.283	6.33333	1.65025	400.667	615.333
;;repo G4/+	40.0444	12.3333	81.0455	7.66667	1.76741	329.667	567.333		;106681/+;6782/+ (F)	18.2873	17.3333	98.8333	8.66667	1.81267	259	603.333		;106681/+;6782/repo G4 (F)	12.3577	24.6667	400	2.33333	1.43006	298.333	678.333
;;repo G4/+	32.9962	8.33333	33.3889	16.3333	1.38646	256.667	527.667		;106681/+;6782/+ (F)	51.0865	10	236.315	4.33333	1.7792	327.667	637		;106681/+;6782/repo G4 (F)	14.1345	23.3333	152.5	5	1.65923	291.667	640.667
;;repo G4/+	22.9852	13.6667	70.6222	11.6667	1.91838	273.667	616.667		;106681/+;6782/+ (F)	40.2983	9.66667	140.681	5	2.42675	360.333	582.333		;106681/+;6782/repo G4 (F)	35.8042	11.3333	128.338	6.66667	1.7084	392.333	666
;;repo G4/+	7.98061	12.75	37.411	11.75	3.47558	96.5	427		;106681/+;6782/+ (F)	11.3855	22	114.976	8.5	2.23272	227.5	605.25		;106681/+;6782/repo G4 (F)	21.3107	18.5	102.165	6.75	2.15035	333.5	625
;;repo G4/+	11.3466	16.5	50.0812	11.5	1.73102	191	526.75		;106681/+;6782/+ (F)	133.177	14.75	214.571	3.5	1.91987	367	666.75		;106681/+;6782/repo G4 (F)	56.5057	8.5	269.812	3.75	1.58923	467.5	639.25
;;repo G4/+	9.34464	11.25	25.1935	15.75	1.90593	114	384.75		;106681/+;6782/+ (F)	32.2687	14.25	253.25	4	1.6633	401.75	610.25		;106681/+;6782/repo G4 (F)	50.4881	11.75	183.506	4.75	1.49661	492.5	644
;;repo G4/+	22.7784	15.5	117.236	6	1.65709	318.25	601.5		;106681/+;6782/+ (F)	27.8544	13.25	118.432	6.5	1.65128	311.75	604.75		;106681/+;6782/repo G4 (F)	27.8068	17.75	183.256	4.5	1.9431	411.5	622
;;repo G4/+	20.9673	7.75	167.754	4.75	1.66619	119.25	557.75		;106681/+;6782/+ (F)	64.3141	12.75	107.412	9.5	1.75542	323	639		;106681/+;6782/repo G4 (F)	14.2477	22.75	134.482	5	1.57666	292.25	632.75
;;repo G4/+	30.2521	14.5	171	4.25	1.75731	362.5	587.25		;106681/+;6782/+ (F)	30.0993	16.5	66.6192	10	1.52951	358.25	619		;106681/+;6782/repo G4 (F)	42.4114	11.25	73.8643	9.25	1.66	432.5	612.25
;;repo G4/+	55.1637	8.5	107.278	7.75	1.55599	406	599.5		;106681/+;6782/+ (F)	15.9583	18.5	60.8352	10.25	1.61201	248.75	548		;106681/+;6782/repo G4 (F)	34.8088	17.5	428.375	1.75	1.62824	386.25	684
;;repo G4/+	32.3169	9.5	112.688	6	1.96139	257.75	592.75		;106681/+;6782/+ (F)	9.94556	23.5	95.0667	8	1.74594	214.25	616.5		;106681/+;6782/repo G4 (F)	24.9367	15.75	311.316	6.25	1.64992	364.25	641.25
;;repo G4/+	17.6205	16	190.2	4	1.89239	231.5	629		;106681/+;6782/+ (F)	27.3661	13.75	77.4833	10.5	1.88384	304	594.25		;106681/+;6782/repo G4 (F)	39.8309	14	184.167	3.66667	1.66009	445.667	659.667
;;repo G4/+	11.8	9.25	50.6916	12	2.18474	126.25	549		;106681/+;6782/+ (F)	8.67777	20.75	43.5931	11.75	2.12773	179.5	505		;106681/+;6782/repo G4 (F)	17.9459	19.25	134.934	8	1.70286	306.25	638.5
;;repo G4/+	9.55737	14.5	151.452	9	1.53092	135	556		;106681/+;6782/+ (F)	15.4027	16.75	66.379	10.75	1.48416	242	622.75		;106681/+;6782/repo G4 (F)	34.9907	11.5	76.6764	8.25	2.11222	358.5	608
;;repo G4/+	25.7377	13.5	75.5635	9.75	1.90162	281.5	565.5		;106681/+;6782/+ (F)	20.5023	17	87.7847	8	1.81378	279.25	601.5		;106681/+;6782/repo G4 (F)	53.1754	15.25	476.5	1.75	1.56116	421.5	669.25
;;repo G4/+	28.7233	12.5	150.531	9.25	1.99304	306	557.25		;106681/+;6782/+ (F)	25.6614	13	91.392	7.75	1.71381	288.75	612.5		;106681/+;6782/repo G4 (F)	37.7108	12.5	139.883	5	1.92025	385.5	634.25
;;repo G4/+	14.4863	11.5	86.0938	10	1.59662	133	492.75		;106681/+;6782/+ (F)	12.0116	21	165.136	4.5	2.21524	232.75	601		;106681/+;6782/repo G4 (F)	48.8406	10.25	121.863	5.5	2.04778	402.25	626.75
;;repo G4/+	56.2634	8.25	179.46	5.25	1.71976	338	648.25		;106681/+;6782/+ (F)	27.5168	14.25	153.562	4	1.85401	363.5	593		;106681/+;6782/repo G4 (F)	24.7007	15.25	55.8673	12.75	1.41607	370.25	575.25
;;repo G4/+	41.9827	8.75	160.475	4	1.8278	316.5	621.25		;106681/+;6782/+ (F)	35.3676	11	73.2714	9.5	1.66787	369.25	624.5		;106681/+;6782/repo G4 (F)	27.6715	18.75	100.289	10	1.6283	361	598.25
GAL4 Control									UAS Control									GAL4 x UAS
	rD aLSE	rD aNSE	rN aLSE	rN aNSE	AI	rDS	rNS			rD aLSE	rD aNSE	rN aLSE	rN aNSE	AI	rDS	rNS			rD aLSE	rD aNSE	rN aLSE	rN aNSE	AI	rDS	rNS
;NP6293 G4/+; (F)	41.1338	10.3333	113.431	6	2.15501	410.333	624.667		;106681/+;6782/+ (F)	7.42577	13.6667	21.7963	20.6667	1.23551	87.6667	436.333		;106681/NP6293 G4;6782/+ (F)	19.3871	12.3333	64.3148	9.66667	1.63436	218	602.667
;NP6293 G4/+; (F)	20.9341	13.6667	236.422	3.33333	2.47215	284.667	680		;106681/+;6782/+ (F)	20.4907	9.66667	67.7	11	2.03609	190.667	565		;106681/NP6293 G4;6782/+ (F)	12.7314	15	118.377	5.66667	1.73657	178.667	630.667
;NP6293 G4/+; (F)	15.5974	17.6667	131.939	5	2.26216	243.667	641		;106681/+;6782/+ (F)	47.0306	11	133.92	7	1.65938	481.333	639.667		;106681/NP6293 G4;6782/+ (F)	25.997	9.66667	68.7321	9	1.55932	243	592
;NP6293 G4/+; (F)	20.4561	18.3333	97.1429	6.33333	1.7887	373.333	596		;106681/+;6782/+ (F)	33.1306	12.6667	182.85	5.33333	1.99353	373	633.667		;106681/NP6293 G4;6782/+ (F)	35.5389	8	134.373	5.33333	2.0778	268.667	619.333
;NP6293 G4/+; (F)	10.3079	11	45.9152	10.3333	2.01702	105.333	474.333		;106681/+;6782/+ (F)	37.6852	11	51.7074	12.3333	1.61559	401.667	574.333		;106681/NP6293 G4;6782/+ (F)	16.8826	12.6667	242.917	3	1.62232	207	671.333
;NP6293 G4/+; (F)	17.0056	13.3333	106.933	4.66667	2.31369	222.667	494		;106681/+;6782/+ (F)	18.5848	17.6667	79.7361	12	1.36572	312	525		;106681/NP6293 G4;6782/+ (F)	28.813	10.3333	186.833	4.33333	2.16009	289.667	613.333
;NP6293 G4/+; (F)	11.7362	18.6667	152.583	4.33333	2.1693	213.333	654.667		;106681/+;6782/+ (F)	11.2167	10.6667	90.8778	7.66667	2.30402	123.667	600.667		;106681/NP6293 G4;6782/+ (F)	23.5541	14.3333	542	1.66667	1.93343	319.667	696
;NP6293 G4/+; (F)	8.85185	16.3333	107.789	5.33333	1.99446	142.333	567.667		;106681/+;6782/+ (F)	50.6167	10.6667	89.2238	9.33333	1.64254	412.667	620.333		;106681/NP6293 G4;6782/+ (F)
;NP6293 G4/+; (F)	7.83377	25	367.167	2.33333	1.45811	194.333	632.333		;106681/+;6782/+ (F)	25.6616	15.6667	113.189	5.66667	2.1615	375	636.333		;106681/NP6293 G4;6782/+ (F)	7.19394	18.3333	192.711	3.66667	1.67429	129	666.667
;NP6293 G4/+; (F)	28.4682	11	168.6	3.66667	2.12444	311.667	582.333		;106681/+;6782/+ (F)	18.4017	12.6667	51.5634	11.6667	1.51809	232.333	535.333		;106681/NP6293 G4;6782/+ (F)	30.2873	14.3333	108.067	6.66667	1.75155	386.333	642.333
;NP6293 G4/+; (F)	14.4825	16.6667	69.625	9.33333	1.44904	236.667	433.667		;106681/+;6782/+ (F)	27.4444	9.33333	131.981	5	2.03453	234	578		;106681/NP6293 G4;6782/+ (F)	38.6222	13	84.2011	7.66667	1.29091	461.333	635.333
;NP6293 G4/+; (F)	26.4848	9.66667	125.524	5	1.9017	240.667	580.667		;106681/+;6782/+ (F)	22.9911	14.6667	78.0556	9	1.60058	284.333	561.333		;106681/NP6293 G4;6782/+ (F)	24.9524	13.3333	53.9473	14	1.46275	333.333	617.333
;NP6293 G4/+; (F)	12.0451	17	118.333	6	2.03807	203	549.667		;106681/+;6782/+ (F)	27.197	14	66.6852	8.33333	1.81417	339.667	554		;106681/NP6293 G4;6782/+ (F)	41.5072	10	84.1741	8	1.86095	393.667	603.333
;NP6293 G4/+; (F)	18.5035	17.6667	198.667	3.33333	1.93141	325	650.667		;106681/+;6782/+ (F)	25.8426	14.6667	55.2768	11.6667	1.70996	331	573.667		;106681/NP6293 G4;6782/+ (F)	46.219	6.33333	132.63	5.33333	1.10455	283	578.333
;NP6293 G4/+; (F)	17.5364	17	547.222	1.66667	1.47384	297.667	697.667		;106681/+;6782/+ (F)	34.0578	11.3333	69.7778	8	1.83406	377.333	527		;106681/NP6293 G4;6782/+ (F)	16.3832	11.3333	128.083	5	1.6887	181	620.667
;NP6293 G4/+; (F)	14.756	14	77.7121	7.66667	2.11121	203.333	510.667		;106681/+;6782/+ (F)	58.131	7	47.5264	13	1.52488	404	552		;106681/NP6293 G4;6782/+ (F)	47.0919	8.66667	37.4932	15.6667	1.71804	306	541
;NP6293 G4/+; (F)	27.6821	14	117.008	5.66667	1.97149	329.333	599.333		;106681/+;6782/+ (F)	16.3032	12.3333	111.967	6.66667	1.30286	177.667	644		;106681/NP6293 G4;6782/+ (F)	37.8538	13	68.7736	9.33333	1.40403	465.333	618.333
;NP6293 G4/+; (F)	17.9639	18.3333	75.0873	9	1.71416	306.333	581		;106681/+;6782/+ (F)	7.80303	14	45.5671	13.3333	1.65488	105.667	517		;106681/NP6293 G4;6782/+ (F)	33.9259	14.6667	90.9583	7	1.5694	434.333	629
;NP6293 G4/+; (F)	35.6981	11	101.458	6	1.80897	310	580.667		;106681/+;6782/+ (F)	20.812	15.3333	32.9159	19.6667	1.31602	295	520.333		;106681/NP6293 G4;6782/+ (F)	25.7111	12	71.8203	8.66667	1.32902	222.667	594.333
;NP6293 G4/+; (F)	32.0549	9.33333	127.185	6.33333	1.33881	274.667	637.333		;106681/+;6782/+ (F)	38.343	9	107.522	5.33333	1.80169	300	569		;106681/NP6293 G4;6782/+ (F)	10.7224	18	87.1917	7.66667	1.60098	193.333	613
;NP6293 G4/+; (F)	33.1427	13.3333	41.4748	19	2.06983	434.333	495		;106681/+;6782/+ (F)	16.7857	10.6667	99.5139	7	1.85199	150.667	610.667		;106681/NP6293 G4;6782/+ (F)	19.8738	16	100.004	6.66667	1.47918	310.333	623.667
;NP6293 G4/+; (F)	4.23087	17.6667	41.7183	12.6667	1.41841	74.3333	527.667		;106681/+;6782/+ (F)	26.7579	8.66667	155.326	9.66667	1.29286	196.333	625.667		;106681/NP6293 G4;6782/+ (F)	26.7167	13	90.6919	7.66667	1.31275	343.333	634
;NP6293 G4/+; (F)	11.4296	13	39.2513	11	2.1929	146	413.667		;106681/+;6782/+ (F)	57.0794	4.66667	112.456	5.66667	1.70569	204.333	632		;106681/NP6293 G4;6782/+ (F)	14.3877	16.3333	91.6012	7	1.93215	231.667	632
;NP6293 G4/+; (F)	12.513	20.3333	27.2708	18	1.49273	253.667	482.333		;106681/+;6782/+ (F)	40.925	8	127.381	5.66667	1.96886	274	611.667		;106681/NP6293 G4;6782/+ (F)	13.9663	17.6667	45.6005	14.3333	1.36784	236.333	536.667
;NP6293 G4/+; (F)	28.0089	12	54.0628	10.3333	2.38659	294.333	513		;106681/+;6782/+ (F)	41.3556	9.33333	336.587	3.66667	1.82759	291.667	666.333		;106681/NP6293 G4;6782/+ (F)	21.9048	9.66667	73.6825	8.33333	1.8375	174.667	604
;NP6293 G4/+; (F)	16.5013	20.6667	79.2111	8	1.70471	335	603.333		;106681/+;6782/+ (F)	18.3993	14	34.7945	17.6667	1.15397	256.667	542.667		;106681/NP6293 G4;6782/+ (F)	22.6712	12.6667	72.9333	9.66667	1.51747	279.333	606
;NP6293 G4/+; (F)	19.5558	16.6667	92.9291	7	1.7531	318.667	614.667		;106681/+;6782/+ (F)	41.7746	9	96.8944	7.66667	2.21541	334	636		;106681/NP6293 G4;6782/+ (F)	25.2958	12.6667	133.483	4.66667	1.35092	306	616.667
;NP6293 G4/+; (F)	11.96	18.3333	87.2833	7	1.4212	219	581.667		;106681/+;6782/+ (F)	57.7094	7.66667	92.181	7.33333	1.77367	314	620		;106681/NP6293 G4;6782/+ (F)	16.0967	21.6667	89.3373	7.66667	1.42239	338.333	545.667
;NP6293 G4/+; (F)	23.864	16.6667	126.5	7	1.4791	372.333	617.333		;106681/+;6782/+ (F)	13.8051	12	96.2222	8	1.22698	164.667	619.333		;106681/NP6293 G4;6782/+ (F)	26.829	14.3333	172.762	6.66667	1.47265	380.667	606.333
;NP6293 G4/+; (F)	14.8076	20	50.5541	11.3333	1.3818	277.333	555		;106681/+;6782/+ (F)	26.0778	11	82.0417	8	1.71337	214	623.667		;106681/NP6293 G4;6782/+ (F)	12.5121	21.6667	347.833	2	1.70815	269.333	695.667
;NP6293 G4/+; (F)	26.6568	16	67.7566	9	1.62023	374.333	588.667		;106681/+;6782/+ (F)	11.6333	5	88.8444	8.33333	1.32225	63.3333	646		;106681/NP6293 G4;6782/+ (F)	13.1402	16	135.086	5	1.85387	204.333	594.667
;NP6293 G4/+; (F)	20.4176	15.3333	305.333	4	1.25975	285.333	637		;106681/+;6782/+ (F)	13.9381	15	52.1946	12	1.11984	204	573.333		;106681/NP6293 G4;6782/+ (F)	10.0556	13.3333	83.8242	8.33333	1.69968	133	614.333
