# Supplementary material for: Modulation of sleep by trafficking of lipids through the Drosophila blood-brain barrier
Source: eLife. 2023 May 4;12:e86336. doi: 10.7554/eLife.86336 (PMC10205086; doi:10.7554/eLife.86336)
Supplement: Figure 4—figure supplement 2—source data 1. [file elife-86336-fig4-figsupp2-data1.xlsx]

## Sheet: Sheet1
PG+SPG>Orct2/Orct RNAi at 18 degree
GAL80 ts Control	rD aLSE	rD aNSE	rN aLSE	rN aNSE	AI	rDS	rNS		UAS Control	rD aLSE	rD aNSE	rN aLSE	rN aNSE	AI	rDS	rNS		GAL80 ts x UAS	rD aLSE	rD aNSE	rN aLSE	rN aNSE	AI	rDS	rNS
;9-137 G4/+;tub80.ts/+ (F)	42.2667	4.33333	57.9803	12	1.67011	183.333	534		;106681/+; 6782/+ (F)	24.0698	13.6667	30.8855	17.3333	1.17671	311.333	502		;106681/9-137 G4;6782/tub80.ts (F)	25.1687	11.3333	75.8762	8.33333	1.0845	266	617.333
;9-137 G4/+;tub80.ts/+ (F)	45.6032	9	88.4056	10.3333	1.36769	279	618		;106681/+; 6782/+ (F)	22.3	16	59.6124	11	1.00853	308	591		;106681/9-137 G4;6782/tub80.ts (F)	15.0324	15	20.7684	22	1.20647	223	440
;9-137 G4/+;tub80.ts/+ (F)	36.4797	9.33333	38.7767	15.6667	1.24378	325.333	587		;106681/+; 6782/+ (F)	58.3836	6.66667	37.5261	14.3333	1.13608	336.667	492		;106681/9-137 G4;6782/tub80.ts (F)	39.6381	9	48.4812	12.6667	1.12175	338.667	593
;9-137 G4/+;tub80.ts/+ (F)	30.5076	9	62.9798	9.66667	1.57629	265.333	602.333		;106681/+; 6782/+ (F)	45.5226	8.33333	118.26	5.33333	1.01902	367.667	601.333		;106681/9-137 G4;6782/tub80.ts (F)	21.0049	16.3333	106.21	7	0.754349	321.667	639
;9-137 G4/+;tub80.ts/+ (F)	14.1827	17	79.1524	9.66667	1.22035	238.667	627.333		;106681/+; 6782/+ (F)	28.9524	13	92.8963	7.66667	1.14573	304.333	590.333		;106681/9-137 G4;6782/tub80.ts (F)	18.8283	18.6667	62.4517	15	1.05587	323.333	555.333
;9-137 G4/+;tub80.ts/+ (F)	25.8571	7.33333	56.8847	10.6667	1.29329	189.333	594.667		;106681/+; 6782/+ (F)	35.2758	10.6667	71.202	9.66667	1.19642	376	616		;106681/9-137 G4;6782/tub80.ts (F)	26.3616	15	137.852	11.6667	1.65747	317.667	621
;9-137 G4/+;tub80.ts/+ (F)	5.21061	22.3333	38.0809	20.3333	1.15575	116	520		;106681/+; 6782/+ (F)	55.85	8	102.917	6.66667	1.14282	427	611.333		;106681/9-137 G4;6782/tub80.ts (F)	46.7206	11	81.7	9	1.22118	335.333	631.667
;9-137 G4/+;tub80.ts/+ (F)	18.7347	12.6667	90.0823	7.66667	1.29946	226.667	616.333		;106681/+; 6782/+ (F)	16.0704	17	25.1285	20.6667	0.998227	271	412.333		;106681/9-137 G4;6782/tub80.ts (F)	42.5384	8	215.569	4.33333	1.18217	337	666.333
;9-137 G4/+;tub80.ts/+ (F)	14.6994	15.3333	55.7024	12.6667	1.19749	224.333	554.667		;106681/+; 6782/+ (F)	51.2821	8.33333	45.5222	13.3333	1.03399	358.667	579.667		;106681/9-137 G4;6782/tub80.ts (F)	35.7321	10.3333	42.001	14	1.13236	345	570.667
;9-137 G4/+;tub80.ts/+ (F)	16.0559	11	43.6027	14.3333	1.09617	165.333	586.333		;106681/+; 6782/+ (F)	15.924	16.3333	68.1966	10.6667	0.945425	253.667	571.333		;106681/9-137 G4;6782/tub80.ts (F)	28.0178	10	163.009	6.33333	0.986191	275.667	634.667
;9-137 G4/+;tub80.ts/+ (F)	8.13158	17.3333	29.9564	17	1.19576	135.667	493		;106681/+; 6782/+ (F)	16.5333	13.3333	40.1889	15	1.18407	206.667	492		;106681/9-137 G4;6782/tub80.ts (F)	51.2139	9.33333	72.6171	9	1.11085	373.667	616.667
;9-137 G4/+;tub80.ts/+ (F)	6.83333	10.6667	26.5	17.6667	1.19081	81.3333	455		;106681/+; 6782/+ (F)	56.8185	6.66667	31.5333	17.3333	1.17672	360	541		;106681/9-137 G4;6782/tub80.ts (F)	20.5595	15.3333	292.361	5	0.916077	316	661
;9-137 G4/+;tub80.ts/+ (F)	8.83757	11	100.852	7.33333	1.72998	96	613.333		;106681/+; 6782/+ (F)	29.303	13.3333	48.6684	14.3333	1.06282	281.333	550.667		;106681/9-137 G4;6782/tub80.ts (F)	11.1873	16.6667	76.5904	9.33333	1.11499	172.333	597
;9-137 G4/+;tub80.ts/+ (F)	10.873	14	47.0449	12.3333	1.68683	150.667	518		;106681/+; 6782/+ (F)	19.8143	14	52.46	12	1.16578	263.333	580		;106681/9-137 G4;6782/tub80.ts (F)	20.7279	16	68.0278	9.33333	1.08343	319.667	611.333
;9-137 G4/+;tub80.ts/+ (F)	17.3095	6.33333	73.0143	8.33333	1.51057	106.667	595		;106681/+; 6782/+ (F)	17.4192	19.3333	58.1477	12.3333	1.24531	301	555.667		;106681/9-137 G4;6782/tub80.ts (F)	54.5056	10	111.528	9	1.04128	413.333	618.333
;9-137 G4/+;tub80.ts/+ (F)	33.3752	10	76.9731	8.66667	1.42193	261	621.333		;106681/+; 6782/+ (F)	49.5635	8	40.2232	14	1.15819	388	524.333		;106681/9-137 G4;6782/tub80.ts (F)	25.1695	12.6667	110.971	9	1.16234	315.333	631.667
;9-137 G4/+;tub80.ts/+ (F)	20.6963	6.66667	102.544	7	1.6423	124.333	654		;106681/+; 6782/+ (F)	40.0099	10.3333	105.845	10.6667	1.26522	385	593		;106681/9-137 G4;6782/tub80.ts (F)	21.7249	12.3333	324.278	3.66667	0.905314	246	669
;9-137 G4/+;tub80.ts/+ (F)	36.8598	10.3333	323.786	4	1.81847	299.667	681		;106681/+; 6782/+ (F)	29.8889	9	110.16	9	1.12706	269	618.667		;106681/9-137 G4;6782/tub80.ts (F)	36.2419	12.6667	98.1111	7	1.02456	378	659.333
;9-137 G4/+;tub80.ts/+ (F)	28.7407	7.66667	86.9491	7.66667	1.61434	207.333	646.667		;106681/+; 6782/+ (F)	68.0952	6	66.0556	10	1.04344	385.667	589.667		;106681/9-137 G4;6782/tub80.ts (F)	105.6	4.66667	93.1717	8.66667	1.00878	439.333	625
;9-137 G4/+;tub80.ts/+ (F)	6.85714	5.66667	122.472	7.66667	1.59222	34.6667	666.333		;106681/+; 6782/+ (F)	45.7348	7.33333	107.967	7	1.61542	234.667	626.667		;106681/9-137 G4;6782/tub80.ts (F)	49.6466	8.66667	518.2	2.33333	1.12074	417.667	699
;9-137 G4/+;tub80.ts/+ (F)	28.45	3	171.328	4	1.44855	82.3333	659		;106681/+; 6782/+ (F)	46.3492	7.66667	383.067	2.66667	1.29935	298.667	656		;106681/9-137 G4;6782/tub80.ts (F)	47.2667	8.33333	74.8	9.33333	1.0763	351.333	633.333
;9-137 G4/+;tub80.ts/+ (F)	59.1944	4.33333	93.4872	7.66667	1.96012	228.667	583.333		;106681/+; 6782/+ (F)	64.4161	9.66667	222.833	3.66667	1.41872	375.667	654.667		;106681/9-137 G4;6782/tub80.ts (F)	35.2444	8	225.889	3.66667	1.13516	234.333	676.333
;9-137 G4/+;tub80.ts/+ (F)	16.3935	11.6667	109.83	8	1.34676	191	604.667		;106681/+; 6782/+ (F)	91.8778	3.33333	156.194	7.33333	1.72677	264.667	610		;106681/9-137 G4;6782/tub80.ts (F)	74.2286	5	129.292	5.66667	1.25403	330.667	671.667
;9-137 G4/+;tub80.ts/+ (F)	4.16667	4.66667	241.722	2.66667	1.43913	17.6667	613.333		;106681/+; 6782/+ (F)	62.9739	8	713.333	1	1.05538	406.333	713.333		;106681/9-137 G4;6782/tub80.ts (F)	27.1333	10.6667	170.828	7.66667	1.58994	291	615.667
;9-137 G4/+;tub80.ts/+ (F)	3.75	2	84.2197	10.3333	1.32725	10	610.333		;106681/+; 6782/+ (F)	200.861	3.66667	131.733	5	1.79208	371	658.667		;106681/9-137 G4;6782/tub80.ts (F)	27.7171	16	157.783	8	0.875047	427.333	661
;9-137 G4/+;tub80.ts/+ (F)	17.1606	10.3333	177.8	5.33333	1.3541	176	617		;106681/+; 6782/+ (F)	55.2644	8	72.9	9.66667	1.6555	376.333	573		;106681/9-137 G4;6782/tub80.ts (F)	26.8649	15	162.472	4.66667	1.21894	378.333	671.667
;9-137 G4/+;tub80.ts/+ (F)	20.5722	5	280.167	2.66667	1.4344	99	671		;106681/+; 6782/+ (F)	22.4683	17	89.0595	7.33333	1.32399	370	649		;106681/9-137 G4;6782/tub80.ts (F)	21.6071	7	234.144	3.33333	0.874795	148.667	677
;9-137 G4/+;tub80.ts/+ (F)	19.6004	12.6667	192.25	5.33333	1.56437	248.667	664.667		;106681/+; 6782/+ (F)	144.778	3.66667	71.1857	11.3333	1.03184	428	613		;106681/9-137 G4;6782/tub80.ts (F)	76.5437	6.66667	225.913	4	0.977166	451	688
;9-137 G4/+;tub80.ts/+ (F)	13.9949	14.6667	583.167	1.33333	1.01836	205.333	699.333		;106681/+; 6782/+ (F)	84.6048	5.33333	84.3521	8	1.12213	426.667	629.667		;106681/9-137 G4;6782/tub80.ts (F)	16.8017	20.3333	100.856	7	0.679088	310.667	644.333
;9-137 G4/+;tub80.ts/+ (F)	9.02991	8	143	4.66667	1.59045	73.6667	643.667		;106681/+; 6782/+ (F)	60.8758	8.33333	215.711	5	1.24512	401.667	682		;106681/9-137 G4;6782/tub80.ts (F)	59.125	6.66667	190.167	4.66667	1.2383	362.667	677
;9-137 G4/+;tub80.ts/+ (F)	8.70238	5	31.1019	15.3333	1.68729	37.6667	464.333		;106681/+; 6782/+ (F)	92.7619	5	86.3963	8	1.49114	320	623.667		;106681/9-137 G4;6782/tub80.ts (F)	32.4091	15.3333	108.889	9.66667	0.844442	446.667	646.333
;9-137 G4/+;tub80.ts/+ (F)	73.2444	7.33333	73.6591	9.66667	2.22698	211	641		;106681/+; 6782/+ (F)	72.4769	6.66667	172.194	5.33333	1.29981	348	644.333		;106681/9-137 G4;6782/tub80.ts (F)	56.8042	8	116.746	10.3333	1.13779	449.333	637
;9-137 G4/+;tub80.ts/+ (F)	45.2976	5	282.75	2.66667	1.79973	218.333	676.333		;106681/+; 6782/+ (F)	23.5635	15	212.431	4.33333	1.39508	319	654		;106681/9-137 G4;6782/tub80.ts (F)	13.119	9.66667	300.881	6.33333	0.971048	147.333	655
;9-137 G4/+;tub80.ts/+ (F)	9.82222	12	54.2609	10.6667	1.06712	116.667	568.667		;106681/+; 6782/+ (F)	19.3939	16	120.811	5	0.881207	284	583.667		;106681/9-137 G4;6782/tub80.ts (F)	8.18444	20.3333	96.2339	11.3333	1.0525	163	574
;9-137 G4/+;tub80.ts/+ (F)	51.1984	5.33333	276.016	7	1.42334	231.667	627.667		;106681/+; 6782/+ (F)	16.8111	15.6667	89.7286	7.33333	1.4025	216.333	602		;106681/9-137 G4;6782/tub80.ts (F)	13.9105	17.6667	69.7061	9.33333	0.868988	243.667	623.667
;9-137 G4/+;tub80.ts/+ (F)	3.4	5.66667	123.744	5	1.01514	15.6667	600		;106681/+; 6782/+ (F)	27.5704	9.33333	141.326	7.33333	1.29755	256.667	558.333		;106681/9-137 G4;6782/tub80.ts (F)	5.82456	18.6667	55.2593	12	0.939335	109.667	586
;9-137 G4/+;tub80.ts/+ (F)	12.65	9.66667	103.139	7.33333	0.918812	124	603.333		;106681/+; 6782/+ (F)	12.8601	15	80.825	8	1.25431	189.667	616.333		;106681/9-137 G4;6782/tub80.ts (F)	8.8547	10.3333	45.9096	12.6667	1.25628	86.6667	571.667
;9-137 G4/+;tub80.ts/+ (F)	8.91005	9.66667	78.3787	10.3333	1.16219	86.3333	601.333		;106681/+; 6782/+ (F)	16.9167	12.3333	45.4877	13.6667	1.23058	208	549.667		;106681/9-137 G4;6782/tub80.ts (F)	26.3198	11.3333	70.9199	9.33333	0.848207	286	635.333
;9-137 G4/+;tub80.ts/+ (F)	24.5111	11.6667	121.15	6.33333	1.14859	283	655		;106681/+; 6782/+ (F)	22.8492	16	88.5515	8.33333	1.14534	325.667	589.667		;106681/9-137 G4;6782/tub80.ts (F)	20.4699	18	382.333	3	1.41523	366.667	681.333
;9-137 G4/+;tub80.ts/+ (F)	13.875	8	79.9639	8.33333	1.05571	119.333	581.667		;106681/+; 6782/+ (F)	33.9788	8.33333	128.375	5.33333	1.08818	282	609		;106681/9-137 G4;6782/tub80.ts (F)	14.5278	12.3333	79.5655	7.33333	1.28704	167	582
;9-137 G4/+;tub80.ts/+ (F)	6.57479	12.6667	46.4563	12.6667	1.20007	83	585		;106681/+; 6782/+ (F)	8.06375	24.3333	33.4534	17.6667	0.907697	176	525.333		;106681/9-137 G4;6782/tub80.ts (F)	32.7783	11.3333	43.3056	12.3333	1.64696	366.667	520.333
;9-137 G4/+;tub80.ts/+ (F)	23.4306	6.66667	28.3293	20.6667	1.12726	151.333	485.333		;106681/+; 6782/+ (F)	20.7943	10.3333	61.9	10.6667	1.3742	200.333	514.667		;106681/9-137 G4;6782/tub80.ts (F)	20.0227	11.6667	77.5128	10	1.22562	230.667	548.667
;9-137 G4/+;tub80.ts/+ (F)	17.6346	10.6667	35.1193	14.3333	1.29773	175.667	479.333		;106681/+; 6782/+ (F)	15.9639	15.3333	47.6677	11	1.30159	244.667	502.333		;106681/9-137 G4;6782/tub80.ts (F)	21.6476	12.6667	118.086	5.66667	1.02793	266	649.667
;9-137 G4/+;tub80.ts/+ (F)	8.36111	12.3333	54.2152	11.6667	1.1531	106.667	586		;106681/+; 6782/+ (F)	28.0676	13	67.2778	8.66667	1.287	358.333	539		;106681/9-137 G4;6782/tub80.ts (F)	20.1486	12.6667	127.262	5.33333	0.904204	238.333	644.667
;9-137 G4/+;tub80.ts/+ (F)	5.9127	5.33333	81.6333	8.33333	1.53375	29.6667	605.667		;106681/+; 6782/+ (F)	17.544	13.3333	34.5405	17	1.10375	234.333	457.333		;106681/9-137 G4;6782/tub80.ts (F)	30.5572	11.6667	86.7738	7.33333	1.12037	271.333	634
;9-137 G4/+;tub80.ts/+ (F)	2.72222	8.66667	88.7971	10	1.16685	24.3333	611		;106681/+; 6782/+ (F)	38.3434	12.6667	55.2517	10.6667	1.2196	410	557.333		;106681/9-137 G4;6782/tub80.ts (F)	22.0906	14	73.3642	8.66667	1.26716	262.667	609.667
;9-137 G4/+;tub80.ts/+ (F)	7.31713	13	123.159	7.66667	0.934174	97.6667	614.333		;106681/+; 6782/+ (F)	22.1693	14	57.5921	14.3333	1.13349	303	524.667		;106681/9-137 G4;6782/tub80.ts (F)	33.3619	11.6667	68.0675	11	0.966643	290.667	617.333
;9-137 G4/+;tub80.ts/+ (F)	7.5	3.33333	34.3339	19.3333	1.28002	18	520.667		;106681/+; 6782/+ (F)	12.0741	18.3333	267.843	6	1.04431	222	593		;106681/9-137 G4;6782/tub80.ts (F)	13.0271	20	76.8056	10.3333	1.35749	258.333	544
PG+SPG>Orct2/Orct RNAi at 31 degree
GAL80 ts Control	rD aLSE	rD aNSE	rN aLSE	rN aNSE	AI	rDS	rNS		UAS Control	rD aLSE	rD aNSE	rN aLSE	rN aNSE	AI	rDS	rNS		GAL80 ts x UAS	rD aLSE	rD aNSE	rN aLSE	rN aNSE	AI	rDS	rNS
;9-137 G4/+;tub80.ts/+ (F)	27.3889	14.5	69.2381	10	1.59588	353	566		;106681/+; 6782/+ (F)	20.1261	26	15.5548	26	1.20494	400	402		;106681/9-137 G4;6782/tub80.ts (F)	58.6127	11.5	161	4	1.58357	517	644
;9-137 G4/+;tub80.ts/+ (F)	25.5349	16.5	24.1264	20	1.23973	418	410		;106681/+; 6782/+ (F)	21.2138	24.5	27.8095	27	1.06809	513	473		;106681/9-137 G4;6782/tub80.ts (F)	13.7375	24.5	29.4586	19.5	1.33668	335	514.5
;9-137 G4/+;tub80.ts/+ (F)	12.4632	22.5	64.1667	13.5	1.07855	282	540		;106681/+; 6782/+ (F)	39.3563	13	20.9577	21	1.31524	471	427.5		;106681/9-137 G4;6782/tub80.ts (F)	77.2643	9.5	193.429	4.5	1.75141	552.5	576.5
;9-137 G4/+;tub80.ts/+ (F)	37.9314	13	32.3626	17	1.50712	411.5	511		;106681/+; 6782/+ (F)	16.337	26	35.2	14	1.30517	424.5	446		;106681/9-137 G4;6782/tub80.ts (F)	109.029	6	73.7121	8.5	1.22237	637	570
;9-137 G4/+;tub80.ts/+ (F)	15.3939	18.5	17.5434	19.5	1.20092	274.5	344		;106681/+; 6782/+ (F)	22.5911	16	32.0524	18	1.43115	342	559.5		;106681/9-137 G4;6782/tub80.ts (F)	42.25	14	128.732	5.5	1.33114	591.5	649.5
;9-137 G4/+;tub80.ts/+ (F)	29.8299	12.5	17.6773	21	1.6015	315.5	365		;106681/+; 6782/+ (F)	49.6429	14	147.167	6	1.13993	494.5	654.5		;106681/9-137 G4;6782/tub80.ts (F)	155.006	22.5	55.675	11	1.46076	443.5	606.5
;9-137 G4/+;tub80.ts/+ (F)	12.895	19	17.5177	25.5	1.05523	255.5	405		;106681/+; 6782/+ (F)	45.4588	13.5	24.0894	21	0.943418	570.5	486		;106681/9-137 G4;6782/tub80.ts (F)	61.26	15	124.476	12	1.47089	493.5	586
;9-137 G4/+;tub80.ts/+ (F)	32.78	16.5	54.2619	14	1.61766	377.5	517.5		;106681/+; 6782/+ (F)	8.84259	27.5	15.2443	26.5	0.968015	243	403		;106681/9-137 G4;6782/tub80.ts (F)	44.9037	15	205.639	5.5	1.52093	478.5	662.5
;9-137 G4/+;tub80.ts/+ (F)	31.8333	18	13.986	25	1.10129	375.5	351.5		;106681/+; 6782/+ (F)	39.4773	13.5	24.7167	19.5	1.26138	508	448		;106681/9-137 G4;6782/tub80.ts (F)	32.7875	17	113.25	7	1.42414	449.5	642
;9-137 G4/+;tub80.ts/+ (F)	38.8045	13.5	46.0278	13	1.25025	333.5	463.5		;106681/+; 6782/+ (F)	67.0563	10.5	56.479	12	1.47053	469	503		;106681/9-137 G4;6782/tub80.ts (F)	38.1143	21	47.5648	17.5	1.47447	368	557.5
;9-137 G4/+;tub80.ts/+ (F)	26.7	15	12.8534	26.5	0.868599	312	346.5		;106681/+; 6782/+ (F)	10.7626	29	88.1964	5.5	1.6366	306	419		;106681/9-137 G4;6782/tub80.ts (F)	13.1687	31	73.6364	9	1.02028	407	626
;9-137 G4/+;tub80.ts/+ (F)	28.4762	13	7.03581	28.5	1.08738	357	205.5		;106681/+; 6782/+ (F)	31.05	16	192.5	8	1.30699	454	628		;106681/9-137 G4;6782/tub80.ts (F)	111.048	12	354.941	9	1.33683	568	626
;9-137 G4/+;tub80.ts/+ (F)	28.5321	12.5	53.9333	11	1.97874	353	469		;106681/+; 6782/+ (F)	8.75758	30	129.095	8.5	1.02363	260	579		;106681/9-137 G4;6782/tub80.ts (F)	48.2333	11	16.2407	26	1.15542	522	420.5
;9-137 G4/+;tub80.ts/+ (F)	26.3868	15.5	17.9947	19.5	1.67604	384	354		;106681/+; 6782/+ (F)	30.8269	13.5	338.711	10	1.11928	415.5	558.5		;106681/9-137 G4;6782/tub80.ts (F)	65.8125	9	55.8182	11	0.985317	586.5	614
;9-137 G4/+;tub80.ts/+ (F)	97.7	5	51.9125	9	2.36085	488.5	450		;106681/+; 6782/+ (F)	25.5	21	20.7271	23.5	1.23111	394.5	477		;106681/9-137 G4;6782/tub80.ts (F)	39.5427	17.5	61.7143	12	0.940149	503	602
;9-137 G4/+;tub80.ts/+ (F)	30.5383	15	54.6767	13	1.22529	395.5	510		;106681/+; 6782/+ (F)	41.7125	14	74.5238	8	1.53647	455.5	582		;106681/9-137 G4;6782/tub80.ts (F)	60.175	13	369.833	6.5	1.44902	528	654
;9-137 G4/+;tub80.ts/+ (F)	26.5606	17.5	25.4391	17.5	1.25708	400.5	500		;106681/+; 6782/+ (F)	21.3158	25	194.917	5.5	1.3919	489	604.5		;106681/9-137 G4;6782/tub80.ts (F)	66.375	9	71.0397	8	1.28042	524	554.5
;9-137 G4/+;tub80.ts/+ (F)	56.6	10.5	47.6856	11.5	1.28623	463.5	566		;106681/+; 6782/+ (F)	24.6299	18	47.7389	14	1.09763	415	602.5		;106681/9-137 G4;6782/tub80.ts (F)	124.278	6	189.288	7.5	1.30935	560.5	615.5
;9-137 G4/+;tub80.ts/+ (F)	36.0556	16.5	48.9615	10.5	2.06473	452	472		;106681/+; 6782/+ (F)	35.9167	13.5	34.4346	16.5	1.43022	478.5	535.5		;106681/9-137 G4;6782/tub80.ts (F)	63.9205	9.5	21.7768	24.5	1.05931	592.5	530
;9-137 G4/+;tub80.ts/+ (F)	17.0086	20.5	33.0947	17	0.989735	320.5	599		;106681/+; 6782/+ (F)	39.7113	15.5	33.2249	15	1.67177	420	464		;106681/9-137 G4;6782/tub80.ts (F)	33.2857	14	58.3182	11	1.07123	466	641.5
;9-137 G4/+;tub80.ts/+ (F)	49.6042	10	11.0636	26.5	1.11261	473	353		;106681/+; 6782/+ (F)	38.711	12.5	147.4	6.5	1.28893	473.5	665.5		;106681/9-137 G4;6782/tub80.ts (F)	76.7262	12.5	47.366	13	1.19099	485	531
;9-137 G4/+;tub80.ts/+ (F)	30.3667	12.5	29.5381	14.5	1.56274	378.5	449		;106681/+; 6782/+ (F)	26.8514	17.5	65.3333	9.5	1.55621	436	574		;106681/9-137 G4;6782/tub80.ts (F)	151	4	353.688	8.5	1.26509	557	589
;9-137 G4/+;tub80.ts/+ (F)	66.5972	11	39.3706	13.5	1.75588	350	548		;106681/+; 6782/+ (F)	59.62	15	30.5353	19	1.69847	476.5	490		;106681/9-137 G4;6782/tub80.ts (F)	99.4375	6	52.0208	14.5	1.28621	533.5	583
;9-137 G4/+;tub80.ts/+ (F)	15.9808	15.5	3.63462	19	1.21538	256.5	137		;106681/+; 6782/+ (F)	28.6923	19.5	48.9	13.5	0.974668	497	604.5		;106681/9-137 G4;6782/tub80.ts (F)	67.8264	8.5	343.233	8	1.48602	573.5	556.5
;9-137 G4/+;tub80.ts/+ (F)	31.8438	12	9.27917	27	0.963005	369.5	298		;106681/+; 6782/+ (F)	69.1364	8.5	185.875	3.5	2.04344	535.5	642.5		;106681/9-137 G4;6782/tub80.ts (F)	37.2434	15.5	44.4	15	0.765765	533.5	589.5
;9-137 G4/+;tub80.ts/+ (F)	22.7574	18.5	31.8658	16.5	1.23157	401.5	583		;106681/+; 6782/+ (F)	92.6964	5.5	32.9333	18.5	1.55357	486.5	507		;106681/9-137 G4;6782/tub80.ts (F)	174.958	3.5	384.444	5	1.72903	598	676
;9-137 G4/+;tub80.ts/+ (F)	125.5	4.5	25.7583	15.5	1.89365	481.5	452		;106681/+; 6782/+ (F)	13.8591	21	23.6452	23	1.28221	289	522		;106681/9-137 G4;6782/tub80.ts (F)	44.9952	10.5	49.8571	12	1.3398	449	579
;9-137 G4/+;tub80.ts/+ (F)	34.359	12.5	44.65	12.5	1.51458	430.5	579		;106681/+; 6782/+ (F)	68.8136	13.5	52.5682	11.5	1.31991	507.5	603		;106681/9-137 G4;6782/tub80.ts (F)	184.5	3	220	4	1.40613	553.5	655
;9-137 G4/+;tub80.ts/+ (F)	38.9692	11.5	106.35	7	1.00411	443	642		;106681/+; 6782/+ (F)	74.0417	7	136.455	7	1.36842	506	633		;106681/9-137 G4;6782/tub80.ts (F)	73.8897	10.5	15.8251	32.5	0.792606	468	435
;9-137 G4/+;tub80.ts/+ (F)	16.7045	20	32.5261	13	1.55298	335.5	492		;106681/+; 6782/+ (F)	43.7692	12	254.5	3	1.38614	520	680		;106681/9-137 G4;6782/tub80.ts (F)	235.833	2.5	289.25	2.5	1.82908	567.5	691.5
;9-137 G4/+;tub80.ts/+ (F)	32.261	13.5	12.9808	20	1.02538	436.5	428		;106681/+; 6782/+ (F)	100.411	5.5	27.1024	22	1.57979	519.5	500.5		;106681/9-137 G4;6782/tub80.ts (F)	121.062	5.5	85.1875	10.5	1.18721	543.5	609.5
;9-137 G4/+;tub80.ts/+ (F)	42.2	11	352.308	7	2.17915	454.5	658		;106681/+; 6782/+ (F)	72	7	78.373	8	1.78851	504	614.5		;106681/9-137 G4;6782/tub80.ts (F)	45.1028	14.5	21.2848	23	1.2422	536	482.5
;9-137 G4/+;tub80.ts/+ (F)	42.5357	10.5	34.6042	14	1.33226	396.5	477.5		;106681/+; 6782/+ (F)	12.063	28.5	57.375	13	1.56839	343.5	517.5		;106681/9-137 G4;6782/tub80.ts (F)	25.275	17.5	26.8881	23.5	1.06921	429	549
;9-137 G4/+;tub80.ts/+ (F)	17.0554	24	7.408	29	1.10923	392.5	219.5		;106681/+; 6782/+ (F)	23.0533	20	35.7833	13.5	1.14982	428	480		;106681/9-137 G4;6782/tub80.ts (F)	15.3825	28.5	36.3121	20.5	1.11253	362.5	537.5
;9-137 G4/+;tub80.ts/+ (F)	23.3512	18.5	12.0154	24	1.29821	411	289.5		;106681/+; 6782/+ (F)	8.39672	26.5	20.9778	21.5	1.67128	222.5	438.5		;106681/9-137 G4;6782/tub80.ts (F)	30.7811	24.5	25.9632	22	0.899553	450.5	561
;9-137 G4/+;tub80.ts/+ (F)	35.9484	11.5	11.4877	28.5	0.965426	363	328		;106681/+; 6782/+ (F)	9.31773	25	79.9	8.5	1.67256	228.5	550		;106681/9-137 G4;6782/tub80.ts (F)	44.9123	12.5	42.7632	15	1.31975	413.5	588.5
;9-137 G4/+;tub80.ts/+ (F)	42.5247	16.5	12.0741	25.5	1.00785	480	313		;106681/+; 6782/+ (F)	7.89583	22.5	74.0667	10	1.64639	176.5	539		;106681/9-137 G4;6782/tub80.ts (F)	13.5556	27	22.6083	22	1.1332	311.5	488.5
;9-137 G4/+;tub80.ts/+ (F)	19.1939	22	18.3663	22	1.44744	410	402		;106681/+; 6782/+ (F)	8.74259	28.5	32.3585	19	1.29219	248.5	538.5		;106681/9-137 G4;6782/tub80.ts (F)	66.3269	9.5	77.8458	14.5	1.20226	538.5	591.5
;9-137 G4/+;tub80.ts/+ (F)	56.6364	9.5	11.0812	15.5	1.68943	513.5	163.5		;106681/+; 6782/+ (F)	19.65	18	23.741	21.5	1.23493	349.5	477.5		;106681/9-137 G4;6782/tub80.ts (F)	92.8	7.5	348.25	2	1.96743	613	697
;9-137 G4/+;tub80.ts/+ (F)	53.85	9.5	22.4737	19	1.11869	507.5	427		;106681/+; 6782/+ (F)	10.212	29	17.5645	27	1.04458	284.5	460.5		;106681/9-137 G4;6782/tub80.ts (F)	41.4416	12.5	39.7917	13.5	1.3938	515	524
;9-137 G4/+;tub80.ts/+ (F)	26.7083	18	13.2386	25	1.23905	427.5	335.5		;106681/+; 6782/+ (F)	27.9563	21	69.3684	12.5	1.32304	404	597		;106681/9-137 G4;6782/tub80.ts (F)	16.8587	23.5	37.8106	14.5	1.35676	396	518
;9-137 G4/+;tub80.ts/+ (F)	21.6529	18.5	12.7989	23.5	1.10237	388.5	301		;106681/+; 6782/+ (F)	8.81048	33.5	20.1692	20	1.47726	266	401.5		;106681/9-137 G4;6782/tub80.ts (F)	15.8929	26.5	95.2889	7	1.30646	380.5	612
;9-137 G4/+;tub80.ts/+ (F)	29.5893	16.5	134.628	8	1.16565	472.5	643.5		;106681/+; 6782/+ (F)	23.875	15	13.8033	27.5	1.28199	354.5	380.5		;106681/9-137 G4;6782/tub80.ts (F)	73.5769	9	43.9533	13.5	1.1704	524.5	593
;9-137 G4/+;tub80.ts/+ (F)	27.5812	19.5	7.838	36	1.01596	406	283.5		;106681/+; 6782/+ (F)	30.7195	15	31.75	16	1.40562	449	508		;106681/9-137 G4;6782/tub80.ts (F)	53.3958	10	96.3182	13	1.00904	515	602.5
;9-137 G4/+;tub80.ts/+ (F)	21.5857	14.5	28.2068	16.5	1.30031	308	442		;106681/+; 6782/+ (F)	12.4305	22	19.989	21.5	1.26425	264.5	420		;106681/9-137 G4;6782/tub80.ts (F)	41.0812	13	35.5365	16.5	1.20485	502.5	550
;9-137 G4/+;tub80.ts/+ (F)	38.9861	10.5	28.6719	15	1.15064	391	430.5		;106681/+; 6782/+ (F)	15.2692	26	715	1	1.41896	397	715		;106681/9-137 G4;6782/tub80.ts (F)	34.1872	14	78.2917	9	1.54433	456	612
;9-137 G4/+;tub80.ts/+ (F)	14.3714	23	15.722	29.5	0.903705	321	376.5		;106681/+; 6782/+ (F)	11.7896	30	29.0357	14	1.17913	350.5	406.5		;106681/9-137 G4;6782/tub80.ts (F)	89	6	20.7101	23.5	1.05021	534	486
;9-137 G4/+;tub80.ts/+ (F)	26.0312	12	7.42962	31	1.22321	290.5	234.5		;106681/+; 6782/+ (F)	16.0647	21.5	16.6504	23.5	1.17754	337	390.5		;106681/9-137 G4;6782/tub80.ts (F)	33.9279	14.5	38.2812	14.5	1.14211	488.5	545
