# Supplementary material for: Modulation of sleep by trafficking of lipids through the Drosophila blood-brain barrier
Source: eLife. 2023 May 4;12:e86336. doi: 10.7554/eLife.86336 (PMC10205086; doi:10.7554/eLife.86336)
Supplement: Figure 4—figure supplement 3—source data 1. [file elife-86336-fig4-figsupp3-data1.xlsx]

## Sheet: Sheet1
PG+SPG>Orct2/Orct RNAi at 18 degree
GAL80 ts Control	rD aLSE	rD aNSE	rN aLSE	rN aNSE	AI	rDS	rNS		UAS Control	rD aLSE	rD aNSE	rN aLSE	rN aNSE	AI	rDS	rNS		GAL80 ts x UAS	rD aLSE	rD aNSE	rN aLSE	rN aNSE	AI	rDS	rNS
;9-137 G4/+;tub80.ts/+ (F)	42.2667	4.33333	57.9803	12	1.67011	183.333	534		;106681/+; 47133/+ (F)	20.0196	14.6667	49.7553	17	0.885533	297.667	589.667		;106681/9-137 G4; 47133/tub80.ts (F)	25.275	9.33333	340.405	12.6667	0.99849	248.667	594.333
;9-137 G4/+;tub80.ts/+ (F)	45.6032	9	88.4056	10.3333	1.36769	279	618		;106681/+; 47133/+ (F)	26.7725	11.6667	88.0197	8	0.789679	298.333	589.667		;106681/9-137 G4; 47133/tub80.ts (F)	25.8833	9.33333	185.003	8	1.17083	219.667	591.667
;9-137 G4/+;tub80.ts/+ (F)	36.4797	9.33333	38.7767	15.6667	1.24378	325.333	587		;106681/+; 47133/+ (F)	11.8889	12	371.889	2.33333	0.920306	142.667	663		;106681/9-137 G4; 47133/tub80.ts (F)	10.6768	14.3333	41.5622	20.3333	1.14812	156	506.667
;9-137 G4/+;tub80.ts/+ (F)	30.5076	9	62.9798	9.66667	1.57629	265.333	602.333		;106681/+; 47133/+ (F)	20.5041	13	150.756	7.66667	0.931436	259.333	560		;106681/9-137 G4; 47133/tub80.ts (F)	4.16955	13.3333	52.0468	10	1.15175	56	461
;9-137 G4/+;tub80.ts/+ (F)	14.1827	17	79.1524	9.66667	1.22035	238.667	627.333		;106681/+; 47133/+ (F)	47.5051	12.3333	126.313	7.33333	0.851758	388.333	626.667		;106681/9-137 G4; 47133/tub80.ts (F)	15.9125	12.6667	51.7099	13.6667	1.03092	170	570.667
;9-137 G4/+;tub80.ts/+ (F)	25.8571	7.33333	56.8847	10.6667	1.29329	189.333	594.667		;106681/+; 47133/+ (F)	32.9698	11.6667	90.5667	9.33333	1.02427	306.667	607.333		;106681/9-137 G4; 47133/tub80.ts (F)	38.8241	10.6667	247.056	5.33333	0.906405	384.667	668
;9-137 G4/+;tub80.ts/+ (F)	5.21061	22.3333	38.0809	20.3333	1.15575	116	520		;106681/+; 47133/+ (F)	48.705	6.66667	99.7564	11.6667	1.1478	286.333	504		;106681/9-137 G4; 47133/tub80.ts (F)	28.1389	10.3333	61.8689	9.66667	1.16437	283.667	586.333
;9-137 G4/+;tub80.ts/+ (F)	18.7347	12.6667	90.0823	7.66667	1.29946	226.667	616.333		;106681/+; 47133/+ (F)	42.3818	10	53.9936	13.3333	0.837718	299.667	531.333		;106681/9-137 G4; 47133/tub80.ts (F)	27.3333	8	158.115	6.66667	1.21466	217.333	619
;9-137 G4/+;tub80.ts/+ (F)	14.6994	15.3333	55.7024	12.6667	1.19749	224.333	554.667		;106681/+; 47133/+ (F)	8.91158	19.3333	85.2364	8	1.02809	173.333	602		;106681/9-137 G4; 47133/tub80.ts (F)	61.8131	9	69.8881	11	0.977238	464.333	566.333
;9-137 G4/+;tub80.ts/+ (F)	16.0559	11	43.6027	14.3333	1.09617	165.333	586.333		;106681/+; 47133/+ (F)	14.1696	15.3333	290.298	4	0.945544	216	612.333		;106681/9-137 G4; 47133/tub80.ts (F)	47.9952	8.33333	76.8	9	1.32056	391	587.333
;9-137 G4/+;tub80.ts/+ (F)	8.13158	17.3333	29.9564	17	1.19576	135.667	493		;106681/+; 47133/+ (F)	20.7559	14.6667	100.4	6.33333	1.10685	290.333	613		;106681/9-137 G4; 47133/tub80.ts (F)	2.90098	16.3333	34.5503	14.3333	1.17983	47	468.333
;9-137 G4/+;tub80.ts/+ (F)	6.83333	10.6667	26.5	17.6667	1.19081	81.3333	455		;106681/+; 47133/+ (F)	58.175	7.33333	119.189	8	1.2194	360.333	615		;106681/9-137 G4; 47133/tub80.ts (F)	24.7444	10.6667	100.063	12	1.12158	260	551.667
;9-137 G4/+;tub80.ts/+ (F)	8.83757	11	100.852	7.33333	1.72998	96	613.333		;106681/+; 47133/+ (F)	7.33965	21.3333	55.0244	10.6667	0.781174	155.333	575		;106681/9-137 G4; 47133/tub80.ts (F)	19.7	16.6667	28.7679	17.3333	0.970317	257	456
;9-137 G4/+;tub80.ts/+ (F)	10.873	14	47.0449	12.3333	1.68683	150.667	518		;106681/+; 47133/+ (F)	7.25246	23.3333	48.2684	17.6667	0.921362	170	529		;106681/9-137 G4; 47133/tub80.ts (F)	12.897	10.6667	87.4495	7.66667	1.05051	135.667	615
;9-137 G4/+;tub80.ts/+ (F)	17.3095	6.33333	73.0143	8.33333	1.51057	106.667	595		;106681/+; 47133/+ (F)	16.781	12.6667	52.9822	14.3333	1.13993	198	554.333		;106681/9-137 G4; 47133/tub80.ts (F)	11.2278	12.3333	41.6438	14.3333	1.03037	132.667	501.667
;9-137 G4/+;tub80.ts/+ (F)	33.3752	10	76.9731	8.66667	1.42193	261	621.333		;106681/+; 47133/+ (F)	43.037	9	103.367	8	1.08215	355	582.667		;106681/9-137 G4; 47133/tub80.ts (F)	11.5246	16.3333	26.8542	18.6667	1.0994	185	481
;9-137 G4/+;tub80.ts/+ (F)	14.3351	11.6667	55.7386	11.3333	1.03924	163.333	612.667		;106681/+; 47133/+ (F)	42.3986	9.33333	203.963	4.66667	0.892846	387.667	629.333		;106681/9-137 G4; 47133/tub80.ts (F)	5.86667	16	77.1973	12.3333	0.861778	84.6667	574.667
;9-137 G4/+;tub80.ts/+ (F)	17.419	10	55.5185	11.3333	0.800133	162.667	592		;106681/+; 47133/+ (F)	28.7762	11.6667	47.3273	18	1.1317	335	486		;106681/9-137 G4; 47133/tub80.ts (F)	5.58964	32	249.103	15.3333	0.554076	186	551.333
;9-137 G4/+;tub80.ts/+ (F)	6.95833	8	195.333	4	1.2746	55.6667	637.667		;106681/+; 47133/+ (F)	19.4194	10	38.173	16	0.929242	176.667	571.667		;106681/9-137 G4; 47133/tub80.ts (F)	13.3406	18	133.606	5	0.84258	235	646.333
;9-137 G4/+;tub80.ts/+ (F)	6.95833	8.66667	87.6667	7	1.09637	61.3333	603.667		;106681/+; 47133/+ (F)	31.9101	12.3333	150.956	8	1.14895	372.667	585		;106681/9-137 G4; 47133/tub80.ts (F)	13.3349	15.6667	59.8524	11.3333	0.924003	199	601.333
;9-137 G4/+;tub80.ts/+ (F)	16.1015	13.6667	81.131	7.66667	1.21509	210.333	619		;106681/+; 47133/+ (F)	26.1815	12.6667	40.4018	14	0.992176	283	509.667		;106681/9-137 G4; 47133/tub80.ts (F)	6.7684	13	36.686	16	0.807127	87.6667	509.667
;9-137 G4/+;tub80.ts/+ (F)	14.0417	6	119.267	5	1.4919	88.3333	596.333		;106681/+; 47133/+ (F)	40.631	12	54.6662	12	1.08918	373.333	552.667		;106681/9-137 G4; 47133/tub80.ts (F)	20.0119	18.6667	233.456	3.33333	0.731885	355.667	678.333
;9-137 G4/+;tub80.ts/+ (F)	21.9672	11.3333	230.011	3.33333	1.00623	249.667	664		;106681/+; 47133/+ (F)	23.3697	14.3333	126.644	9.66667	1.16206	290.333	605.667		;106681/9-137 G4; 47133/tub80.ts (F)	14.96	15.3333	139.421	5.33333	1.18425	229	643.667
;9-137 G4/+;tub80.ts/+ (F)	4.41401	30.6667	28.8009	18.6667	0.677984	134	511.333		;106681/+; 47133/+ (F)	25.1171	14.6667	249.222	2.66667	1.27738	345.333	640.667		;106681/9-137 G4; 47133/tub80.ts (F)	25.2092	14.6667	139.708	5.33333	0.679913	350.667	664.333
;9-137 G4/+;tub80.ts/+ (F)	7.05926	7.33333	40.9516	14.3333	1.84159	57.3333	506		;106681/+; 47133/+ (F)	21.1545	16	49.0764	16.6667	0.811047	306.333	522.667		;106681/9-137 G4; 47133/tub80.ts (F)	14.2956	19	124.431	8.33333	0.694969	248.333	640
;9-137 G4/+;tub80.ts/+ (F)	8.88889	17	51.3907	11.3333	1.1269	154.333	474.667		;106681/+; 47133/+ (F)	21.7787	12.6667	41.1208	14	1.07927	242.333	544.333		;106681/9-137 G4; 47133/tub80.ts (F)	13.0979	25.3333	278.505	13.3333	0.661901	324	624.667
;9-137 G4/+;tub80.ts/+ (F)	25.229	8.66667	35.159	14.3333	1.22312	206	499.333		;106681/+; 47133/+ (F)	22.7429	12	31.0667	16.3333	1.03413	266.667	504.667		;106681/9-137 G4; 47133/tub80.ts (F)	14.8763	21	255.987	12.6667	0.672698	293.667	595
;9-137 G4/+;tub80.ts/+ (F)	27.1909	10.3333	142.194	5	1.29459	281.667	627		;106681/+; 47133/+ (F)	10.3922	15.6667	108.542	6	1.03246	162	597		;106681/9-137 G4; 47133/tub80.ts (F)	15.4409	18.3333	76.4566	9	0.57866	212.667	641.333
;9-137 G4/+;tub80.ts/+ (F)	7.53333	18	62.2037	10.3333	1.1724	127.667	602		;106681/+; 47133/+ (F)	22.1039	15.6667	58.0486	11.3333	1.04703	340.333	538		;106681/9-137 G4; 47133/tub80.ts (F)	13.5788	21.3333	159.944	5	0.769258	282	670
;9-137 G4/+;tub80.ts/+ (F)	9.59608	14.6667	82.7583	7.66667	1.12656	141.667	584		;106681/+; 47133/+ (F)	6.06092	13	69.0281	8.66667	1.30957	84	579.333		;106681/9-137 G4; 47133/tub80.ts (F)	4.64773	20	131.735	6.33333	0.569472	94	661.333
;9-137 G4/+;tub80.ts/+ (F)	25.3333	10	39.1831	16	1.20988	253.333	541.333		;106681/+; 47133/+ (F)	18.6095	14.6667	51.0657	11.3333	1.15162	272.333	576.667		;106681/9-137 G4; 47133/tub80.ts (F)	6.15618	23	104.308	8	0.605156	141	654
;9-137 G4/+;tub80.ts/+ (F)	8.78519	11	51.5489	11.6667	1.18888	94.6667	577		;106681/+; 47133/+ (F)	30.6496	11.6667	81.449	10.3333	1.28664	342	564.667		;106681/9-137 G4; 47133/tub80.ts (F)	28.7889	11.6667	186.076	4.66667	1.05406	318	646.667
PG+SPG>Orct2/Orct RNAi at 31 degree
GAL80 ts Control	rD aLSE	rD aNSE	rN aLSE	rN aNSE	AI	rDS	rNS		UAS Control	rD aLSE	rD aNSE	rN aLSE	rN aNSE	AI	rDS	rNS		GAL80 ts x UAS	rD aLSE	rD aNSE	rN aLSE	rN aNSE	AI	rDS	rNS
;9-137 G4/+;tub80.ts/+ (F)	27.3889	14.5	69.2381	10	1.59588	353	566		;106681/+; 47133/+ (F)	39.1548	14.5	20.1357	17	1.68146	435.5	344		;106681/9-137 G4; 47133/tub80.ts (F)	61.0227	9.5	24.1141	21	1.61565	567	468.5
;9-137 G4/+;tub80.ts/+ (F)	25.5349	16.5	24.1264	20	1.23973	418	410		;106681/+; 47133/+ (F)	26.294	21.5	28.9263	23	0.911686	388	524.5		;106681/9-137 G4; 47133/tub80.ts (F)	57.447	14	31.6278	19	0.977773	522.5	581
;9-137 G4/+;tub80.ts/+ (F)	12.4632	22.5	64.1667	13.5	1.07855	282	540		;106681/+; 47133/+ (F)	47.6705	9.5	36.875	12	1.89092	437	442.5		;106681/9-137 G4; 47133/tub80.ts (F)	74.5662	10.5	51.3824	12.5	1.37665	505.5	558.5
;9-137 G4/+;tub80.ts/+ (F)	37.9314	13	32.3626	17	1.50712	411.5	511		;106681/+; 47133/+ (F)	73.125	10.5	26.9692	16.5	1.34036	442	436		;106681/9-137 G4; 47133/tub80.ts (F)	42.3217	12	72.9667	10	1.33917	502	528.5
;9-137 G4/+;tub80.ts/+ (F)	15.3939	18.5	17.5434	19.5	1.20092	274.5	344		;106681/+; 47133/+ (F)	22.7147	23.5	82.7143	7	1.15618	470	579		;106681/9-137 G4; 47133/tub80.ts (F)	61.4964	14.5	19.7632	22.5	1.4963	529	417.5
;9-137 G4/+;tub80.ts/+ (F)	29.8299	12.5	17.6773	21	1.6015	315.5	365		;106681/+; 47133/+ (F)	46.2898	9.5	31.744	13	1.72667	425	417		;106681/9-137 G4; 47133/tub80.ts (F)	84.1548	6.5	55.6778	12	1.30379	543.5	620.5
;9-137 G4/+;tub80.ts/+ (F)	12.895	19	17.5177	25.5	1.05523	255.5	405		;106681/+; 47133/+ (F)	28.8882	13.5	15.4524	19	1.48504	338.5	285.5		;106681/9-137 G4; 47133/tub80.ts (F)	62.2647	11	44.0631	15.5	1.35074	452.5	544
;9-137 G4/+;tub80.ts/+ (F)	32.78	16.5	54.2619	14	1.61766	377.5	517.5		;106681/+; 47133/+ (F)	14.609	27	34.0868	14.5	0.904011	387.5	442		;106681/9-137 G4; 47133/tub80.ts (F)	163.75	8	204.812	5	1.72699	561.5	638
;9-137 G4/+;tub80.ts/+ (F)	31.8333	18	13.986	25	1.10129	375.5	351.5		;106681/+; 47133/+ (F)	48.9583	10	7.61324	38	0.912647	476	286		;106681/9-137 G4; 47133/tub80.ts (F)	76.0238	8	54.2468	9	1.46506	597.5	485
;9-137 G4/+;tub80.ts/+ (F)	38.8045	13.5	46.0278	13	1.25025	333.5	463.5		;106681/+; 47133/+ (F)	42.4556	12	20.2229	15.5	1.33755	467.5	315		;106681/9-137 G4; 47133/tub80.ts (F)	14.6519	27.5	28.7763	25.5	1.46568	402	506
;9-137 G4/+;tub80.ts/+ (F)	26.7	15	12.8534	26.5	0.868599	312	346.5		;106681/+; 47133/+ (F)	31.3333	15	26.8958	14	1.50845	470	384		;106681/9-137 G4; 47133/tub80.ts (F)	88.9615	15	134.2	9	0.57703	586	655
;9-137 G4/+;tub80.ts/+ (F)	28.4762	13	7.03581	28.5	1.08738	357	205.5		;106681/+; 47133/+ (F)	35.9702	15.5	39.3116	16	1.2443	346	451.5		;106681/9-137 G4; 47133/tub80.ts (F)	49.1891	12	102.153	6.5	1.69868	480.5	562.5
;9-137 G4/+;tub80.ts/+ (F)	28.5321	12.5	53.9333	11	1.97874	353	469		;106681/+; 47133/+ (F)	12.1667	23.5	17.1698	19.5	0.951611	285	337		;106681/9-137 G4; 47133/tub80.ts (F)	51.131	13.5	25.3558	18.5	1.52139	427.5	402.5
;9-137 G4/+;tub80.ts/+ (F)	26.3868	15.5	17.9947	19.5	1.67604	384	354		;106681/+; 47133/+ (F)	28.025	15	14.5673	31.5	0.99086	371.5	402.5		;106681/9-137 G4; 47133/tub80.ts (F)	35.2837	17	175.955	12	1.46027	396.5	511
;9-137 G4/+;tub80.ts/+ (F)	97.7	5	51.9125	9	2.36085	488.5	450		;106681/+; 47133/+ (F)	27.6263	14.5	58.0667	9.5	1.7459	353	552		;106681/9-137 G4; 47133/tub80.ts (F)	43.224	12.5	45.0143	12	1.49999	528.5	508
;9-137 G4/+;tub80.ts/+ (F)	30.5383	15	54.6767	13	1.22529	395.5	510		;106681/+; 47133/+ (F)	16.8308	16.5	11.939	24.5	1.55867	263	296		;106681/9-137 G4; 47133/tub80.ts (F)	110.583	5	59.9875	9	1.95293	524	523.5
;9-137 G4/+;tub80.ts/+ (F)	50.3905	11	22.1856	21.5	1.28239	453	448		;106681/+; 47133/+ (F)	37.5794	13.5	22.9984	17.5	1.34645	467	404.5		;106681/9-137 G4; 47133/tub80.ts (F)	50.9083	11	129.812	5.5	1.50529	557.5	558.5
;9-137 G4/+;tub80.ts/+ (F)	26.9124	15.5	13.3424	26.5	0.958541	405	335		;106681/+; 47133/+ (F)	24.2556	20	17.4255	23.5	1.17533	485	410		;106681/9-137 G4; 47133/tub80.ts (F)	53.2579	11.5	113.736	6.5	1.05183	584.5	625.5
;9-137 G4/+;tub80.ts/+ (F)	61.5	7	17.4876	18	1.72784	427	321.5		;106681/+; 47133/+ (F)	33.2227	16	9.57917	35	0.976182	437.5	314		;106681/9-137 G4; 47133/tub80.ts (F)	25.7919	18.5	34.3125	18	1.11509	437	529
;9-137 G4/+;tub80.ts/+ (F)	59.575	6.5	26.749	16	1.44094	377	427		;106681/+; 47133/+ (F)	79.9375	7	30.756	13	1.61445	546	388.5		;106681/9-137 G4; 47133/tub80.ts (F)	81.125	7	30.4213	19.5	1.08535	557	502
;9-137 G4/+;tub80.ts/+ (F)	32.2017	13.5	27.1375	18	1.22367	402.5	474.5		;106681/+; 47133/+ (F)	35.0385	13	12.5042	31	0.800897	455.5	373.5		;106681/9-137 G4; 47133/tub80.ts (F)	53.5833	10.5	38.1769	18	0.871927	551	491
;9-137 G4/+;tub80.ts/+ (F)	98.525	7	11.1944	13.5	1.54276	540.5	151		;106681/+; 47133/+ (F)	16.1111	22.5	13.1516	33.5	0.81615	357	425.5		;106681/9-137 G4; 47133/tub80.ts (F)	67.9792	10	73.9363	11.5	0.529094	647	629.5
;9-137 G4/+;tub80.ts/+ (F)	36.7167	13.5	27.8947	19	1.25424	495.5	530.5		;106681/+; 47133/+ (F)	9.53175	32	15.5499	28.5	0.627615	294	444		;106681/9-137 G4; 47133/tub80.ts (F)	38.9354	15	21.5333	13.5	1.5267	532.5	308.5
;9-137 G4/+;tub80.ts/+ (F)	9.28846	27	18.8532	27.5	0.716666	251	518.5		;106681/+; 47133/+ (F)	32.6432	15.5	19.6	24	0.763208	456.5	458		;106681/9-137 G4; 47133/tub80.ts (F)	22.5934	20	53.0422	14.5	1.0234	433	530.5
;9-137 G4/+;tub80.ts/+ (F)	20	17	9.56818	22	1.45062	340	210.5		;106681/+; 47133/+ (F)	21.5429	20	9.57785	31	0.835088	421.5	294		;106681/9-137 G4; 47133/tub80.ts (F)	46.6042	13	27.0347	17	0.997872	499.5	453.5
;9-137 G4/+;tub80.ts/+ (F)	56.8125	9	14.325	28.5	1.03343	504.5	391		;106681/+; 47133/+ (F)	16.4311	21.5	11.8281	25	1.21393	340	284		;106681/9-137 G4; 47133/tub80.ts (F)	10.0528	34.5	23.2442	23	0.686105	342.5	522
;9-137 G4/+;tub80.ts/+ (F)	18.6638	20.5	15.0643	23.5	0.75871	369	355.5		;106681/+; 47133/+ (F)	20.9108	18.5	12.6533	21	1.17154	386	268.5		;106681/9-137 G4; 47133/tub80.ts (F)	40.3186	14.5	13.7051	34.5	0.834581	565	464
;9-137 G4/+;tub80.ts/+ (F)	53.2143	8.5	8.22059	21.5	1.26117	441.5	191.5		;106681/+; 47133/+ (F)	13.1844	27.5	10.3554	35.5	0.481458	364	356.5		;106681/9-137 G4; 47133/tub80.ts (F)	36.9762	13	31.684	17	0.742292	476.5	536
;9-137 G4/+;tub80.ts/+ (F)	29.1016	13.5	37.385	14	1.48125	393.5	509		;106681/+; 47133/+ (F)	60.4755	11.5	16.5318	21.5	1.33705	512	341.5		;106681/9-137 G4; 47133/tub80.ts (F)	44	12	36.4688	16	0.812494	520	583.5
;9-137 G4/+;tub80.ts/+ (F)	29.682	15.5	7.27741	31	0.872287	415.5	222		;106681/+; 47133/+ (F)	81.5778	7	9.25897	28	1.17823	507	262		;106681/9-137 G4; 47133/tub80.ts (F)	34.537	18	27.9127	19.5	1.41332	425.5	540.5
;9-137 G4/+;tub80.ts/+ (F)	37.5818	13	6.29293	25.5	0.929495	465	169		;106681/+; 47133/+ (F)	52.8512	9.5	11.7083	31.5	1.12482	453.5	360		;106681/9-137 G4; 47133/tub80.ts (F)	26.5417	21	43.8199	12.5	1.44238	434	435
;9-137 G4/+;tub80.ts/+ (F)	38.6389	10.5	52.7875	14	1.65092	398	579.5		;106681/+; 47133/+ (F)	53.3407	10	16.1429	21	1.49613	486	339		;106681/9-137 G4; 47133/tub80.ts (F)	43.6167	12.5	19.7449	20	1.11304	513	381.5
;9-137 G4/+;tub80.ts/+ (F)	29.4221	16	19.9192	20	1.10052	386.5	399		;106681/+; 47133/+ (F)	24.6527	19	15.2	25	0.908281	461	380		;106681/9-137 G4; 47133/tub80.ts (F)	57.2429	11	98.9375	6.5	1.6102	537.5	599.5
;9-137 G4/+;tub80.ts/+ (F)	35.7773	10.5	23.6964	19	1.95277	369	410.5		;106681/+; 47133/+ (F)	30.7885	16.5	15.3348	30	1.12563	465	453.5		;106681/9-137 G4; 47133/tub80.ts (F)	135.1	4.5	237.25	3.5	2.09334	602.5	679
;9-137 G4/+;tub80.ts/+ (F)	32.6111	13.5	31.342	16	1.36375	343.5	415.5		;106681/+; 47133/+ (F)	10.5144	21.5	8.94103	34.5	1.06392	212.5	305.5		;106681/9-137 G4; 47133/tub80.ts (F)	73.7308	9.5	15.2167	27.5	1.32313	608.5	410.5
;9-137 G4/+;tub80.ts/+ (F)	27.4575	16	29.0833	16	1.26693	419	404		;106681/+; 47133/+ (F)	6.70139	21	35.3237	24	0.761751	143.5	506.5		;106681/9-137 G4; 47133/tub80.ts (F)	53.2967	15.5	30.5521	14	2.08527	431.5	407.5
;9-137 G4/+;tub80.ts/+ (F)	22.8864	11.5	17.5184	14.5	1.466	262.5	246		;106681/+; 47133/+ (F)	26.5958	17	8.8176	29.5	1.18825	352	261.5		;106681/9-137 G4; 47133/tub80.ts (F)	90.6786	9	44.65	11	2.53535	532	489
;9-137 G4/+;tub80.ts/+ (F)	95.7917	7.5	36.6192	18	1.57494	345.5	494.5		;106681/+; 47133/+ (F)	27.5083	17.5	14.5964	29	1.04881	467.5	420.5		;106681/9-137 G4; 47133/tub80.ts (F)	100.222	6	48.8476	11	2.41007	416	423
;9-137 G4/+;tub80.ts/+ (F)	16.3396	19.5	21.4564	23	1.0421	325.5	420		;106681/+; 47133/+ (F)	38.8706	12	31.5	18	0.967078	464.5	564		;106681/9-137 G4; 47133/tub80.ts (F)	79.9167	8	121.056	6	2.21401	470	504.5
;9-137 G4/+;tub80.ts/+ (F)	27.3281	17	48.875	11	1.58136	453.5	528.5		;106681/+; 47133/+ (F)	10.2262	26	35.44	17.5	1.06368	255.5	430		;106681/9-137 G4; 47133/tub80.ts (F)	100.812	6	41.7778	9.5	1.92454	523.5	391
;9-137 G4/+;tub80.ts/+ (F)	18.5326	20.5	70.0635	8	1.46847	377.5	551		;106681/+; 47133/+ (F)	13.7403	25	21.004	19.5	1.02365	337	412		;106681/9-137 G4; 47133/tub80.ts (F)	87.9524	6.5	46.5779	12.5	1.9648	565.5	570
;9-137 G4/+;tub80.ts/+ (F)	11.9554	21.5	47.0346	11.5	1.49962	248.5	525.5		;106681/+; 47133/+ (F)	98.3167	5.5	275.417	2.5	2.60318	536.5	658.5		;106681/9-137 G4; 47133/tub80.ts (F)	21.694	20.5	58.0321	9.5	2.07198	444	475
;9-137 G4/+;tub80.ts/+ (F)	18.0676	18.5	13.6286	24	1.17151	337	306		;106681/+; 47133/+ (F)	9.63636	31.5	27.6259	17.5	1.20951	303.5	456.5		;106681/9-137 G4; 47133/tub80.ts (F)	40.8111	12	131.667	5	1.33979	444.5	625
;9-137 G4/+;tub80.ts/+ (F)	28.1957	17.5	59.2692	10.5	1.17665	412	583		;106681/+; 47133/+ (F)	238.875	3	64.5556	9	2.17228	623.5	581		;106681/9-137 G4; 47133/tub80.ts (F)	77.2857	7	32.1282	15.5	1.7326	541	495.5
;9-137 G4/+;tub80.ts/+ (F)	26.8389	14.5	43	11	1.7694	386.5	474.5		;106681/+; 47133/+ (F)	104.929	5.5	89.7833	5.5	2.71865	529	483.5		;106681/9-137 G4; 47133/tub80.ts (F)	84.5444	7	32.9375	14	2.30517	552.5	455
;9-137 G4/+;tub80.ts/+ (F)	61.9881	10	74.5417	9	1.42463	498.5	578.5											;106681/9-137 G4; 47133/tub80.ts (F)	40.451	12	32.9583	14	1.68273	483.5	452.5
;9-137 G4/+;tub80.ts/+ (F)	52.1	10	6.52632	33	1.18669	521	216											;106681/9-137 G4; 47133/tub80.ts (F)	25.9127	16	64.8766	9	1.72296	401	560.5
;9-137 G4/+;tub80.ts/+ (F)	13.0889	16.5	47.3417	11	1.75831	224	518.5											;106681/9-137 G4; 47133/tub80.ts (F)	39.7441	13.5	45.9375	12	1.61217	494	477
