# Supplementary material for: Modulation of sleep by trafficking of lipids through the Drosophila blood-brain barrier
Source: eLife. 2023 May 4;12:e86336. doi: 10.7554/eLife.86336 (PMC10205086; doi:10.7554/eLife.86336)
Supplement: Figure 4—figure supplement 4—source data 1. [file elife-86336-fig4-figsupp4-data1.xlsx]

## Sheet: Sheet1
18 degree										31 degree
GAL4 tub80 ts Control	Total sleep		UAS Control	Total sleep		GAL4 tub80 ts x UAS	Total sleep			GAL4 tub80 ts Control	Total sleep		UAS Control	Total sleep		GAL4 tub80 ts x UAS	Total sleep
;9-137G4/+;tub80.ts/+(F)	848.667		;60125/+; (F)	1130		;60125/9-137G4;tub80.ts/+	839			;9-137G4/+;tub80.ts/+(F)	775		;60125/+; (F)	947		;60125/9-137G4;tub80.ts/+	868.5
;9-137G4/+;tub80.ts/+(F)	653.667		;60125/+; (F)	1072		;60125/9-137G4;tub80.ts/+	929			;9-137G4/+;tub80.ts/+(F)	250		;60125/+; (F)	1076		;60125/9-137G4;tub80.ts/+	1020
;9-137G4/+;tub80.ts/+(F)	572.667		;60125/+; (F)	1040		;60125/9-137G4;tub80.ts/+	1087.33			;9-137G4/+;tub80.ts/+(F)	462		;60125/+; (F)	987.5		;60125/9-137G4;tub80.ts/+	1039.5
;9-137G4/+;tub80.ts/+(F)	677		;60125/+; (F)	826		;60125/9-137G4;tub80.ts/+	1111.33			;9-137G4/+;tub80.ts/+(F)	683		;60125/+; (F)	1002		;60125/9-137G4;tub80.ts/+	1114
;9-137G4/+;tub80.ts/+(F)	788.333		;60125/+; (F)	875		;60125/9-137G4;tub80.ts/+	1076.33			;9-137G4/+;tub80.ts/+(F)	416.5		;60125/+; (F)	1023.5		;60125/9-137G4;tub80.ts/+	1178
;9-137G4/+;tub80.ts/+(F)	763		;60125/+; (F)	941		;60125/9-137G4;tub80.ts/+	900			;9-137G4/+;tub80.ts/+(F)	364.5		;60125/+; (F)	1077.5		;60125/9-137G4;tub80.ts/+	878.5
;9-137G4/+;tub80.ts/+(F)	579.333		;60125/+; (F)	929		;60125/9-137G4;tub80.ts/+	1044			;9-137G4/+;tub80.ts/+(F)	327.5		;60125/+; (F)	909.5		;60125/9-137G4;tub80.ts/+	979.5
;9-137G4/+;tub80.ts/+(F)	361.667		;60125/+; (F)	856		;60125/9-137G4;tub80.ts/+	981.333			;9-137G4/+;tub80.ts/+(F)	187		;60125/+; (F)	884.5		;60125/9-137G4;tub80.ts/+	1075.5
;9-137G4/+;tub80.ts/+(F)	460.333		;60125/+; (F)	1096		;60125/9-137G4;tub80.ts/+	1035			;9-137G4/+;tub80.ts/+(F)	415.5		;60125/+; (F)	1083		;60125/9-137G4;tub80.ts/+	1068
;9-137G4/+;tub80.ts/+(F)	519.667		;60125/+; (F)	1069		;60125/9-137G4;tub80.ts/+	897			;9-137G4/+;tub80.ts/+(F)	291.5		;60125/+; (F)	1158		;60125/9-137G4;tub80.ts/+	895
;9-137G4/+;tub80.ts/+(F)	570.667		;60125/+; (F)	604		;60125/9-137G4;tub80.ts/+	879.667			;9-137G4/+;tub80.ts/+(F)	737.5		;60125/+; (F)	770.5		;60125/9-137G4;tub80.ts/+	989
;9-137G4/+;tub80.ts/+(F)	777.667		;60125/+; (F)	735		;60125/9-137G4;tub80.ts/+	972.333			;9-137G4/+;tub80.ts/+(F)	559.5		;60125/+; (F)	948.5		;60125/9-137G4;tub80.ts/+	974
;9-137G4/+;tub80.ts/+(F)	910.667		;60125/+; (F)	849		;60125/9-137G4;tub80.ts/+	1061.67			;9-137G4/+;tub80.ts/+(F)	548		;60125/+; (F)	835.5		;60125/9-137G4;tub80.ts/+	1064
;9-137G4/+;tub80.ts/+(F)	937.667		;60125/+; (F)	957		;60125/9-137G4;tub80.ts/+	1077			;9-137G4/+;tub80.ts/+(F)	775.5		;60125/+; (F)	939.5		;60125/9-137G4;tub80.ts/+	1157.5
;9-137G4/+;tub80.ts/+(F)	803.333		;60125/+; (F)	927		;60125/9-137G4;tub80.ts/+	969.667			;9-137G4/+;tub80.ts/+(F)	616		;60125/+; (F)	962		;60125/9-137G4;tub80.ts/+	917.5
;9-137G4/+;tub80.ts/+(F)	669		;60125/+; (F)	930		;60125/9-137G4;tub80.ts/+	974			;9-137G4/+;tub80.ts/+(F)	324.5		;60125/+; (F)	938		;60125/9-137G4;tub80.ts/+	741
;9-137G4/+;tub80.ts/+(F)	731		;60125/+; (F)	933.333		;60125/9-137G4;tub80.ts/+	831			;9-137G4/+;tub80.ts/+(F)	547		;60125/+; (F)	991		;60125/9-137G4;tub80.ts/+	772.5
;9-137G4/+;tub80.ts/+(F)	698		;60125/+; (F)	1004.67		;60125/9-137G4;tub80.ts/+	848.333			;9-137G4/+;tub80.ts/+(F)	626		;60125/+; (F)	1064.5		;60125/9-137G4;tub80.ts/+	819.5
;9-137G4/+;tub80.ts/+(F)	721.667		;60125/+; (F)	1137		;60125/9-137G4;tub80.ts/+	861.667			;9-137G4/+;tub80.ts/+(F)	384		;60125/+; (F)	1098		;60125/9-137G4;tub80.ts/+	927
;9-137G4/+;tub80.ts/+(F)	697.333		;60125/+; (F)	860.333		;60125/9-137G4;tub80.ts/+	826.333			;9-137G4/+;tub80.ts/+(F)	541		;60125/+; (F)	934		;60125/9-137G4;tub80.ts/+	894.5
;9-137G4/+;tub80.ts/+(F)	903.333		;60125/+; (F)	1041.67		;60125/9-137G4;tub80.ts/+	979.333			;9-137G4/+;tub80.ts/+(F)	764		;60125/+; (F)	973.5		;60125/9-137G4;tub80.ts/+	771.5
;9-137G4/+;tub80.ts/+(F)	824		;60125/+; (F)	792.667		;60125/9-137G4;tub80.ts/+	1048.33			;9-137G4/+;tub80.ts/+(F)	512		;60125/+; (F)	893		;60125/9-137G4;tub80.ts/+	853.5
;9-137G4/+;tub80.ts/+(F)	879		;60125/+; (F)	764		;60125/9-137G4;tub80.ts/+	801.667			;9-137G4/+;tub80.ts/+(F)	715.5		;60125/+; (F)	884.5		;60125/9-137G4;tub80.ts/+	793
;9-137G4/+;tub80.ts/+(F)	799.333		;60125/+; (F)	981.333		;60125/9-137G4;tub80.ts/+	864.333			;9-137G4/+;tub80.ts/+(F)	559		;60125/+; (F)	1038.5		;60125/9-137G4;tub80.ts/+	826
;9-137G4/+;tub80.ts/+(F)	788		;60125/+; (F)	1072.33		;60125/9-137G4;tub80.ts/+	937.333			;9-137G4/+;tub80.ts/+(F)	622.5		;60125/+; (F)	864		;60125/9-137G4;tub80.ts/+	947
;9-137G4/+;tub80.ts/+(F)	593		;60125/+; (F)	956		;60125/9-137G4;tub80.ts/+	1034			;9-137G4/+;tub80.ts/+(F)	152		;60125/+; (F)	1041.5		;60125/9-137G4;tub80.ts/+	1058.5
;9-137G4/+;tub80.ts/+(F)	723.333		;60125/+; (F)	934.667		;60125/9-137G4;tub80.ts/+	903.333			;9-137G4/+;tub80.ts/+(F)	420.5		;60125/+; (F)	795		;60125/9-137G4;tub80.ts/+	806.5
;9-137G4/+;tub80.ts/+(F)	524.667		;60125/+; (F)	911.667		;60125/9-137G4;tub80.ts/+	652.667			;9-137G4/+;tub80.ts/+(F)	257.5		;60125/+; (F)	850		;60125/9-137G4;tub80.ts/+	913.5
;9-137G4/+;tub80.ts/+(F)	962.667		;60125/+; (F)	744.667		;60125/9-137G4;tub80.ts/+	984			;9-137G4/+;tub80.ts/+(F)	840.5		;60125/+; (F)	942		;60125/9-137G4;tub80.ts/+	1073.5
;9-137G4/+;tub80.ts/+(F)	697.333		;60125/+; (F)	869.333		;60125/9-137G4;tub80.ts/+	776.667			;9-137G4/+;tub80.ts/+(F)	612.5		;60125/+; (F)	688		;60125/9-137G4;tub80.ts/+	826.5
;9-137G4/+;tub80.ts/+(F)	882		;60125/+; (F)	962.667		;60125/9-137G4;tub80.ts/+	854			;9-137G4/+;tub80.ts/+(F)	644.5		;60125/+; (F)	1000		;60125/9-137G4;tub80.ts/+	661.5
;9-137G4/+;tub80.ts/+(F)	882		;60125/+; (F)	960		;60125/9-137G4;tub80.ts/+	943.667			;9-137G4/+;tub80.ts/+(F)	600		;60125/+; (F)	906		;60125/9-137G4;tub80.ts/+	913
;9-137G4/+;tub80.ts/+(F)	848.667		;;52658/+	747.333		;9-137G4/+;52658/tub80.ts	945			;9-137G4/+;tub80.ts/+(F)	775		;;52658/+	790.5		;9-137G4/+;52658/tub80.ts	803.5
;9-137G4/+;tub80.ts/+(F)	653.667		;;52658/+	1095.67		;9-137G4/+;52658/tub80.ts	662.667			;9-137G4/+;tub80.ts/+(F)	250		;;52658/+	884.5		;9-137G4/+;52658/tub80.ts	623.5
;9-137G4/+;tub80.ts/+(F)	572.667		;;52658/+	913		;9-137G4/+;52658/tub80.ts	764			;9-137G4/+;tub80.ts/+(F)	462		;;52658/+	607.5		;9-137G4/+;52658/tub80.ts	711.5
;9-137G4/+;tub80.ts/+(F)	677		;;52658/+	568.667		;9-137G4/+;52658/tub80.ts	827.333			;9-137G4/+;tub80.ts/+(F)	683		;;52658/+	516.5		;9-137G4/+;52658/tub80.ts	987.5
;9-137G4/+;tub80.ts/+(F)	788.333		;;52658/+	1038		;9-137G4/+;52658/tub80.ts	718			;9-137G4/+;tub80.ts/+(F)	416.5		;;52658/+	728		;9-137G4/+;52658/tub80.ts	770.5
;9-137G4/+;tub80.ts/+(F)	763		;;52658/+	791.333		;9-137G4/+;52658/tub80.ts	797.667			;9-137G4/+;tub80.ts/+(F)	364.5		;;52658/+	741		;9-137G4/+;52658/tub80.ts	640
;9-137G4/+;tub80.ts/+(F)	579.333		;;52658/+	804		;9-137G4/+;52658/tub80.ts	580.667			;9-137G4/+;tub80.ts/+(F)	327.5		;;52658/+	806		;9-137G4/+;52658/tub80.ts	548.5
;9-137G4/+;tub80.ts/+(F)	361.667		;;52658/+	726.333		;9-137G4/+;52658/tub80.ts	631.333			;9-137G4/+;tub80.ts/+(F)	187		;;52658/+	721.5		;9-137G4/+;52658/tub80.ts	756
;9-137G4/+;tub80.ts/+(F)	460.333		;;52658/+	718.667		;9-137G4/+;52658/tub80.ts	818.667			;9-137G4/+;tub80.ts/+(F)	415.5		;;52658/+	657.5		;9-137G4/+;52658/tub80.ts	584
;9-137G4/+;tub80.ts/+(F)	519.667		;;52658/+	950.333		;9-137G4/+;52658/tub80.ts	770			;9-137G4/+;tub80.ts/+(F)	291.5		;;52658/+	660.5		;9-137G4/+;52658/tub80.ts	816.5
;9-137G4/+;tub80.ts/+(F)	570.667		;;52658/+	816.333		;9-137G4/+;52658/tub80.ts	640.333			;9-137G4/+;tub80.ts/+(F)	737.5		;;52658/+	792.5		;9-137G4/+;52658/tub80.ts	676
;9-137G4/+;tub80.ts/+(F)	777.667		;;52658/+	621		;9-137G4/+;52658/tub80.ts	590			;9-137G4/+;tub80.ts/+(F)	559.5		;;52658/+	581		;9-137G4/+;52658/tub80.ts	479
;9-137G4/+;tub80.ts/+(F)	910.667		;;52658/+	593		;9-137G4/+;52658/tub80.ts	625			;9-137G4/+;tub80.ts/+(F)	548		;;52658/+	614		;9-137G4/+;52658/tub80.ts	534.5
;9-137G4/+;tub80.ts/+(F)	937.667		;;52658/+	913.333		;9-137G4/+;52658/tub80.ts	554.667			;9-137G4/+;tub80.ts/+(F)	775.5		;;52658/+	987		;9-137G4/+;52658/tub80.ts	728
;9-137G4/+;tub80.ts/+(F)	803.333		;;52658/+	1039		;9-137G4/+;52658/tub80.ts	717.333			;9-137G4/+;tub80.ts/+(F)	616		;;52658/+	613.5		;9-137G4/+;52658/tub80.ts	829.5
;9-137G4/+;tub80.ts/+(F)	669		;;52658/+	706.667		;9-137G4/+;52658/tub80.ts	987.333			;9-137G4/+;tub80.ts/+(F)	324.5		;;52658/+	466.5		;9-137G4/+;52658/tub80.ts	914
;9-137G4/+;tub80.ts/+(F)	731		;;52658/+	676.667		;9-137G4/+;52658/tub80.ts	757.333			;9-137G4/+;tub80.ts/+(F)	547		;;52658/+	579		;9-137G4/+;52658/tub80.ts	770
;9-137G4/+;tub80.ts/+(F)	698		;;52658/+	917.333		;9-137G4/+;52658/tub80.ts	972.333			;9-137G4/+;tub80.ts/+(F)	626		;;52658/+	786		;9-137G4/+;52658/tub80.ts	959.5
;9-137G4/+;tub80.ts/+(F)	721.667		;;52658/+	915.333		;9-137G4/+;52658/tub80.ts	722			;9-137G4/+;tub80.ts/+(F)	384		;;52658/+	676.5		;9-137G4/+;52658/tub80.ts	829.5
;9-137G4/+;tub80.ts/+(F)	697.333		;;52658/+	733.667		;9-137G4/+;52658/tub80.ts	815.667			;9-137G4/+;tub80.ts/+(F)	541		;;52658/+	487.5		;9-137G4/+;52658/tub80.ts	910.5
;9-137G4/+;tub80.ts/+(F)	903.333		;;52658/+	859.667		;9-137G4/+;52658/tub80.ts	896			;9-137G4/+;tub80.ts/+(F)	764		;;52658/+	834		;9-137G4/+;52658/tub80.ts	882.5
;9-137G4/+;tub80.ts/+(F)	824		;;52658/+	840.333		;9-137G4/+;52658/tub80.ts	752.333			;9-137G4/+;tub80.ts/+(F)	512		;;52658/+	291.5		;9-137G4/+;52658/tub80.ts	540
;9-137G4/+;tub80.ts/+(F)	879		;;52658/+	681.333		;9-137G4/+;52658/tub80.ts	952.333			;9-137G4/+;tub80.ts/+(F)	715.5		;;52658/+	627.5		;9-137G4/+;52658/tub80.ts	869.5
;9-137G4/+;tub80.ts/+(F)	799.333		;;52658/+	985.667		;9-137G4/+;52658/tub80.ts	531.667			;9-137G4/+;tub80.ts/+(F)	559		;;52658/+	657		;9-137G4/+;52658/tub80.ts	665.5
;9-137G4/+;tub80.ts/+(F)	788		;;52658/+	752		;9-137G4/+;52658/tub80.ts	689.667			;9-137G4/+;tub80.ts/+(F)	622.5		;;52658/+	658		;9-137G4/+;52658/tub80.ts	941.5
;9-137G4/+;tub80.ts/+(F)	593		;;52658/+	752		;9-137G4/+;52658/tub80.ts	706.333			;9-137G4/+;tub80.ts/+(F)	152		;;52658/+	685		;9-137G4/+;52658/tub80.ts	767.5
;9-137G4/+;tub80.ts/+(F)	723.333		;;52658/+	563		;9-137G4/+;52658/tub80.ts	827			;9-137G4/+;tub80.ts/+(F)	420.5		;;52658/+	385		;9-137G4/+;52658/tub80.ts	655
;9-137G4/+;tub80.ts/+(F)	524.667		;;52658/+	713.333		;9-137G4/+;52658/tub80.ts	694.333			;9-137G4/+;tub80.ts/+(F)	257.5		;;52658/+	753.5		;9-137G4/+;52658/tub80.ts	787.5
;9-137G4/+;tub80.ts/+(F)	962.667		;;52658/+	831.667		;9-137G4/+;52658/tub80.ts	894			;9-137G4/+;tub80.ts/+(F)	840.5		;;52658/+	772		;9-137G4/+;52658/tub80.ts	931
;9-137G4/+;tub80.ts/+(F)	697.333		;;52658/+	1010		;9-137G4/+;52658/tub80.ts	802.333			;9-137G4/+;tub80.ts/+(F)	612.5		;;52658/+	569.5		;9-137G4/+;52658/tub80.ts	773
;9-137G4/+;tub80.ts/+(F)	882		;;52658/+	890		;9-137G4/+;52658/tub80.ts	868.667			;9-137G4/+;tub80.ts/+(F)	644.5					;9-137G4/+;52658/tub80.ts	680.5
;9-137G4/+;tub80.ts/+(F)	882					;9-137G4/+;52658/tub80.ts	864.333			;9-137G4/+;tub80.ts/+(F)	600					;9-137G4/+;52658/tub80.ts	897
;9-137G4/+;tub80.ts/+(F)	848.667		;57583/+; (F)	1121		;57583/9-137G4;tub80.ts/+	986			;9-137G4/+;tub80.ts/+(F)	775		;57583/+; (F)	1005.5		;57583/9-137G4;tub80.ts/+	1063.5
;9-137G4/+;tub80.ts/+(F)	653.667		;57583/+; (F)	806		;57583/9-137G4;tub80.ts/+	1105			;9-137G4/+;tub80.ts/+(F)	250		;57583/+; (F)	723.5		;57583/9-137G4;tub80.ts/+	1134
;9-137G4/+;tub80.ts/+(F)	572.667		;57583/+; (F)	871.333		;57583/9-137G4;tub80.ts/+	994.667			;9-137G4/+;tub80.ts/+(F)	462		;57583/+; (F)	920		;57583/9-137G4;tub80.ts/+	1077
;9-137G4/+;tub80.ts/+(F)	677		;57583/+; (F)	793.333		;57583/9-137G4;tub80.ts/+	1004.33			;9-137G4/+;tub80.ts/+(F)	683		;57583/+; (F)	792.5		;57583/9-137G4;tub80.ts/+	781
;9-137G4/+;tub80.ts/+(F)	788.333		;57583/+; (F)	942		;57583/9-137G4;tub80.ts/+	1069.33			;9-137G4/+;tub80.ts/+(F)	416.5		;57583/+; (F)	939		;57583/9-137G4;tub80.ts/+	1097.5
;9-137G4/+;tub80.ts/+(F)	763		;57583/+; (F)	839.667		;57583/9-137G4;tub80.ts/+	963.667			;9-137G4/+;tub80.ts/+(F)	364.5		;57583/+; (F)	692.5		;57583/9-137G4;tub80.ts/+	902.5
;9-137G4/+;tub80.ts/+(F)	579.333		;57583/+; (F)	937.667		;57583/9-137G4;tub80.ts/+	965			;9-137G4/+;tub80.ts/+(F)	327.5		;57583/+; (F)	894.5		;57583/9-137G4;tub80.ts/+	972.5
;9-137G4/+;tub80.ts/+(F)	361.667		;57583/+; (F)	803		;57583/9-137G4;tub80.ts/+	894			;9-137G4/+;tub80.ts/+(F)	187		;57583/+; (F)	863		;57583/9-137G4;tub80.ts/+	1019.5
;9-137G4/+;tub80.ts/+(F)	460.333		;57583/+; (F)	792		;57583/9-137G4;tub80.ts/+	965.333			;9-137G4/+;tub80.ts/+(F)	415.5		;57583/+; (F)	712		;57583/9-137G4;tub80.ts/+	960.5
;9-137G4/+;tub80.ts/+(F)	519.667		;57583/+; (F)	1016.67		;57583/9-137G4;tub80.ts/+	785.333			;9-137G4/+;tub80.ts/+(F)	291.5		;57583/+; (F)	927		;57583/9-137G4;tub80.ts/+	805.5
;9-137G4/+;tub80.ts/+(F)	570.667		;57583/+; (F)	829		;57583/9-137G4;tub80.ts/+	904			;9-137G4/+;tub80.ts/+(F)	737.5		;57583/+; (F)	835.5		;57583/9-137G4;tub80.ts/+	1119
;9-137G4/+;tub80.ts/+(F)	777.667		;57583/+; (F)	844.333		;57583/9-137G4;tub80.ts/+	1101.33			;9-137G4/+;tub80.ts/+(F)	559.5		;57583/+; (F)	692.5		;57583/9-137G4;tub80.ts/+	1032
;9-137G4/+;tub80.ts/+(F)	910.667		;57583/+; (F)	805.333		;57583/9-137G4;tub80.ts/+	1080.67			;9-137G4/+;tub80.ts/+(F)	548		;57583/+; (F)	821.5		;57583/9-137G4;tub80.ts/+	1201.5
;9-137G4/+;tub80.ts/+(F)	937.667		;57583/+; (F)	765.333		;57583/9-137G4;tub80.ts/+	995.333			;9-137G4/+;tub80.ts/+(F)	775.5		;57583/+; (F)	886		;57583/9-137G4;tub80.ts/+	937.5
;9-137G4/+;tub80.ts/+(F)	803.333		;57583/+; (F)	808		;57583/9-137G4;tub80.ts/+	946			;9-137G4/+;tub80.ts/+(F)	616		;57583/+; (F)	839		;57583/9-137G4;tub80.ts/+	1032.5
;9-137G4/+;tub80.ts/+(F)	669		;57583/+; (F)	845.333		;57583/9-137G4;tub80.ts/+	780.667			;9-137G4/+;tub80.ts/+(F)	324.5		;57583/+; (F)	924.5		;57583/9-137G4;tub80.ts/+	765.5
;9-137G4/+;tub80.ts/+(F)	731		;57583/+; (F)	977		;57583/9-137G4;tub80.ts/+	1046.33			;9-137G4/+;tub80.ts/+(F)	547		;57583/+; (F)	1150		;57583/9-137G4;tub80.ts/+	1146
;9-137G4/+;tub80.ts/+(F)	698		;57583/+; (F)	901		;57583/9-137G4;tub80.ts/+	872.667			;9-137G4/+;tub80.ts/+(F)	626		;57583/+; (F)	1039		;57583/9-137G4;tub80.ts/+	789
;9-137G4/+;tub80.ts/+(F)	721.667		;57583/+; (F)	916.667		;57583/9-137G4;tub80.ts/+	1094.67			;9-137G4/+;tub80.ts/+(F)	384		;57583/+; (F)	1089.5		;57583/9-137G4;tub80.ts/+	1122.5
;9-137G4/+;tub80.ts/+(F)	697.333		;57583/+; (F)	799		;57583/9-137G4;tub80.ts/+	993.333			;9-137G4/+;tub80.ts/+(F)	541		;57583/+; (F)	931		;57583/9-137G4;tub80.ts/+	1009
;9-137G4/+;tub80.ts/+(F)	903.333		;57583/+; (F)	926.333		;57583/9-137G4;tub80.ts/+	1194			;9-137G4/+;tub80.ts/+(F)	764		;57583/+; (F)	1127.5		;57583/9-137G4;tub80.ts/+	1226.5
;9-137G4/+;tub80.ts/+(F)	824		;57583/+; (F)	1002.33		;57583/9-137G4;tub80.ts/+	1015.33			;9-137G4/+;tub80.ts/+(F)	512		;57583/+; (F)	962.5		;57583/9-137G4;tub80.ts/+	1151
;9-137G4/+;tub80.ts/+(F)	879		;57583/+; (F)	972.667		;57583/9-137G4;tub80.ts/+	814			;9-137G4/+;tub80.ts/+(F)	715.5		;57583/+; (F)	1199		;57583/9-137G4;tub80.ts/+	883.5
;9-137G4/+;tub80.ts/+(F)	799.333		;57583/+; (F)	963.333		;57583/9-137G4;tub80.ts/+	1034.67			;9-137G4/+;tub80.ts/+(F)	559		;57583/+; (F)	1162.5		;57583/9-137G4;tub80.ts/+	1034
;9-137G4/+;tub80.ts/+(F)	788		;57583/+; (F)	1021		;57583/9-137G4;tub80.ts/+	1078.67			;9-137G4/+;tub80.ts/+(F)	622.5		;57583/+; (F)	1058.5		;57583/9-137G4;tub80.ts/+	1011.5
;9-137G4/+;tub80.ts/+(F)	593		;57583/+; (F)	1063.33		;57583/9-137G4;tub80.ts/+	990.333			;9-137G4/+;tub80.ts/+(F)	152		;57583/+; (F)	1190.5		;57583/9-137G4;tub80.ts/+	1088.5
;9-137G4/+;tub80.ts/+(F)	723.333		;57583/+; (F)	981		;57583/9-137G4;tub80.ts/+	853			;9-137G4/+;tub80.ts/+(F)	420.5		;57583/+; (F)	1103.5		;57583/9-137G4;tub80.ts/+	1078
;9-137G4/+;tub80.ts/+(F)	524.667		;57583/+; (F)	972.333		;57583/9-137G4;tub80.ts/+	964.333			;9-137G4/+;tub80.ts/+(F)	257.5		;57583/+; (F)	1052.5		;57583/9-137G4;tub80.ts/+	934.5
;9-137G4/+;tub80.ts/+(F)	962.667		;57583/+; (F)	874.667		;57583/9-137G4;tub80.ts/+	780.333			;9-137G4/+;tub80.ts/+(F)	840.5		;57583/+; (F)	1173		;57583/9-137G4;tub80.ts/+	892
;9-137G4/+;tub80.ts/+(F)	697.333		;57583/+; (F)	907.667		;57583/9-137G4;tub80.ts/+	1005.67			;9-137G4/+;tub80.ts/+(F)	612.5		;57583/+; (F)	1021.5		;57583/9-137G4;tub80.ts/+	1078.5
;9-137G4/+;tub80.ts/+(F)	882		;57583/+; (F)	921.667		;57583/9-137G4;tub80.ts/+	960.333			;9-137G4/+;tub80.ts/+(F)	644.5		;57583/+; (F)	929.5		;57583/9-137G4;tub80.ts/+	980.5
;9-137G4/+;tub80.ts/+(F)	882					;57583/9-137G4;tub80.ts/+	834.667			;9-137G4/+;tub80.ts/+(F)	600					;57583/9-137G4;tub80.ts/+	844.5
;9-137G4/+;tub80.ts/+(F)	848.667		;;1176/+	661		;9-137G4/+;1176/tub80.ts	505.333			;9-137G4/+;tub80.ts/+(F)	775		;;1176/+	178		;9-137G4/+;1176/tub80.ts	313
;9-137G4/+;tub80.ts/+(F)	653.667		;;1176/+	498.333		;9-137G4/+;1176/tub80.ts	749.333			;9-137G4/+;tub80.ts/+(F)	250		;;1176/+	470		;9-137G4/+;1176/tub80.ts	536.5
;9-137G4/+;tub80.ts/+(F)	572.667		;;1176/+	615.333		;9-137G4/+;1176/tub80.ts	421.667			;9-137G4/+;tub80.ts/+(F)	462		;;1176/+	492		;9-137G4/+;1176/tub80.ts	212
;9-137G4/+;tub80.ts/+(F)	677		;;1176/+	527		;9-137G4/+;1176/tub80.ts	638.667			;9-137G4/+;tub80.ts/+(F)	683		;;1176/+	277.5		;9-137G4/+;1176/tub80.ts	480
;9-137G4/+;tub80.ts/+(F)	788.333		;;1176/+	674.333		;9-137G4/+;1176/tub80.ts	804			;9-137G4/+;tub80.ts/+(F)	416.5		;;1176/+	464.5		;9-137G4/+;1176/tub80.ts	646
;9-137G4/+;tub80.ts/+(F)	763		;;1176/+	469.333		;9-137G4/+;1176/tub80.ts	475			;9-137G4/+;tub80.ts/+(F)	364.5		;;1176/+	316.5		;9-137G4/+;1176/tub80.ts	391.5
;9-137G4/+;tub80.ts/+(F)	579.333		;;1176/+	772.333		;9-137G4/+;1176/tub80.ts	623.333			;9-137G4/+;tub80.ts/+(F)	327.5		;;1176/+	757.5		;9-137G4/+;1176/tub80.ts	363
;9-137G4/+;tub80.ts/+(F)	361.667		;;1176/+	854.333		;9-137G4/+;1176/tub80.ts	674.667			;9-137G4/+;tub80.ts/+(F)	187		;;1176/+	452		;9-137G4/+;1176/tub80.ts	416.5
;9-137G4/+;tub80.ts/+(F)	460.333		;;1176/+	809.667		;9-137G4/+;1176/tub80.ts	537.667			;9-137G4/+;tub80.ts/+(F)	415.5		;;1176/+	759.5		;9-137G4/+;1176/tub80.ts	343.5
;9-137G4/+;tub80.ts/+(F)	519.667		;;1176/+	540		;9-137G4/+;1176/tub80.ts	680			;9-137G4/+;tub80.ts/+(F)	291.5		;;1176/+	333.5		;9-137G4/+;1176/tub80.ts	304
;9-137G4/+;tub80.ts/+(F)	570.667		;;1176/+	409		;9-137G4/+;1176/tub80.ts	551.667			;9-137G4/+;tub80.ts/+(F)	737.5		;;1176/+	72		;9-137G4/+;1176/tub80.ts	429.5
;9-137G4/+;tub80.ts/+(F)	777.667		;;1176/+	648		;9-137G4/+;1176/tub80.ts	619			;9-137G4/+;tub80.ts/+(F)	559.5		;;1176/+	702		;9-137G4/+;1176/tub80.ts	390
;9-137G4/+;tub80.ts/+(F)	910.667		;;1176/+	461		;9-137G4/+;1176/tub80.ts	760.667			;9-137G4/+;tub80.ts/+(F)	548		;;1176/+	248		;9-137G4/+;1176/tub80.ts	762
;9-137G4/+;tub80.ts/+(F)	937.667		;;1176/+	692		;9-137G4/+;1176/tub80.ts	763.333			;9-137G4/+;tub80.ts/+(F)	775.5		;;1176/+	752.5		;9-137G4/+;1176/tub80.ts	372.5
;9-137G4/+;tub80.ts/+(F)	803.333		;;1176/+	655		;9-137G4/+;1176/tub80.ts	651			;9-137G4/+;tub80.ts/+(F)	616		;;1176/+	496.5		;9-137G4/+;1176/tub80.ts	674.5
;9-137G4/+;tub80.ts/+(F)	669		;;1176/+	553.333		;9-137G4/+;1176/tub80.ts	502			;9-137G4/+;tub80.ts/+(F)	324.5		;;1176/+	504.5		;9-137G4/+;1176/tub80.ts	203
;9-137G4/+;tub80.ts/+(F)	731		;;1176/+	867.333		;9-137G4/+;1176/tub80.ts	311.333			;9-137G4/+;tub80.ts/+(F)	547		;;1176/+	524		;9-137G4/+;1176/tub80.ts	244
;9-137G4/+;tub80.ts/+(F)	698		;;1176/+	611		;9-137G4/+;1176/tub80.ts	781.333			;9-137G4/+;tub80.ts/+(F)	626		;;1176/+	522.5		;9-137G4/+;1176/tub80.ts	602.5
;9-137G4/+;tub80.ts/+(F)	721.667		;;1176/+	706.667		;9-137G4/+;1176/tub80.ts	694			;9-137G4/+;tub80.ts/+(F)	384		;;1176/+	733		;9-137G4/+;1176/tub80.ts	531.5
;9-137G4/+;tub80.ts/+(F)	697.333		;;1176/+	780.667		;9-137G4/+;1176/tub80.ts	622.667			;9-137G4/+;tub80.ts/+(F)	541		;;1176/+	737.5		;9-137G4/+;1176/tub80.ts	375.5
;9-137G4/+;tub80.ts/+(F)	903.333		;;1176/+	371		;9-137G4/+;1176/tub80.ts	1167			;9-137G4/+;tub80.ts/+(F)	764		;;1176/+	421		;9-137G4/+;1176/tub80.ts	1234.5
;9-137G4/+;tub80.ts/+(F)	824		;;1176/+	918.333		;9-137G4/+;1176/tub80.ts	829			;9-137G4/+;tub80.ts/+(F)	512		;;1176/+	765.5		;9-137G4/+;1176/tub80.ts	645.5
;9-137G4/+;tub80.ts/+(F)	879		;;1176/+	666.667		;9-137G4/+;1176/tub80.ts	627.333			;9-137G4/+;tub80.ts/+(F)	715.5		;;1176/+	473.5		;9-137G4/+;1176/tub80.ts	128.5
;9-137G4/+;tub80.ts/+(F)	799.333		;;1176/+	648.667		;9-137G4/+;1176/tub80.ts	865			;9-137G4/+;tub80.ts/+(F)	559		;;1176/+	482.5		;9-137G4/+;1176/tub80.ts	550.5
;9-137G4/+;tub80.ts/+(F)	788		;;1176/+	560		;9-137G4/+;1176/tub80.ts	523			;9-137G4/+;tub80.ts/+(F)	622.5		;;1176/+	212.5		;9-137G4/+;1176/tub80.ts	322.5
;9-137G4/+;tub80.ts/+(F)	593		;;1176/+	642.333		;9-137G4/+;1176/tub80.ts	823.667			;9-137G4/+;tub80.ts/+(F)	152		;;1176/+	371.5		;9-137G4/+;1176/tub80.ts	692.5
;9-137G4/+;tub80.ts/+(F)	723.333		;;1176/+	711.667		;9-137G4/+;1176/tub80.ts	568			;9-137G4/+;tub80.ts/+(F)	420.5		;;1176/+	864		;9-137G4/+;1176/tub80.ts	474
;9-137G4/+;tub80.ts/+(F)	524.667		;;1176/+	618		;9-137G4/+;1176/tub80.ts	640.333			;9-137G4/+;tub80.ts/+(F)	257.5		;;1176/+	281		;9-137G4/+;1176/tub80.ts	468.5
;9-137G4/+;tub80.ts/+(F)	962.667		;;1176/+	576.667		;9-137G4/+;1176/tub80.ts	552.667			;9-137G4/+;tub80.ts/+(F)	840.5		;;1176/+	374.5		;9-137G4/+;1176/tub80.ts	427.5
;9-137G4/+;tub80.ts/+(F)	697.333		;;1176/+	598		;9-137G4/+;1176/tub80.ts	716.333			;9-137G4/+;tub80.ts/+(F)	612.5		;;1176/+	446.5		;9-137G4/+;1176/tub80.ts	536.5
;9-137G4/+;tub80.ts/+(F)	882		;;1176/+	645.333		;9-137G4/+;1176/tub80.ts	620			;9-137G4/+;tub80.ts/+(F)	644.5		;;1176/+	379.5		;9-137G4/+;1176/tub80.ts	388.5
;9-137G4/+;tub80.ts/+(F)	882		;;1176/+	440.667		;9-137G4/+;1176/tub80.ts	477.333			;9-137G4/+;tub80.ts/+(F)	600		;;1176/+	652		;9-137G4/+;1176/tub80.ts	475.5
