# Supplementary material for: Modulation of sleep by trafficking of lipids through the Drosophila blood-brain barrier
Source: eLife. 2023 May 4;12:e86336. doi: 10.7554/eLife.86336 (PMC10205086; doi:10.7554/eLife.86336)
Supplement: Figure 4—figure supplement 5—source data 1. [file elife-86336-fig4-figsupp5-data1.xlsx]

## Sheet: Sheet1
18 degree									31 degree
GAL4 Control	Total Sleep		UAS Control	Total Sleep		GAL4 x UAS	Total Sleep		GAL4 Control	Total Sleep		UAS Control	Total Sleep		GAL4 x UAS	Total Sleep
; tub80.ts/+;MZ0709/+(F)	676.5		;106681/+;6782/+(F)	957.75		;106681/tub80ts;6782/MZ0709 (F)	950.75		; tub80.ts/+;MZ0709/+(F)	824		;106681/+;6782/+(F)	1195.5		;106681/tub80ts;6782/MZ0709 (F)	947
; tub80.ts/+;MZ0709/+(F)	657		;106681/+;6782/+(F)	908.5		;106681/tub80ts;6782/MZ0709 (F)	932.75		; tub80.ts/+;MZ0709/+(F)	787.5		;106681/+;6782/+(F)	1162		;106681/tub80ts;6782/MZ0709 (F)	1000
; tub80.ts/+;MZ0709/+(F)	1006.75		;106681/+;6782/+(F)	900.75		;106681/tub80ts;6782/MZ0709 (F)	918.75		; tub80.ts/+;MZ0709/+(F)	1004		;106681/+;6782/+(F)	1126		;106681/tub80ts;6782/MZ0709 (F)	855.5
; tub80.ts/+;MZ0709/+(F)	784.5		;106681/+;6782/+(F)	801.75		;106681/tub80ts;6782/MZ0709 (F)	950.5		; tub80.ts/+;MZ0709/+(F)	892.5		;106681/+;6782/+(F)	1103.5		;106681/tub80ts;6782/MZ0709 (F)	1021.5
; tub80.ts/+;MZ0709/+(F)	748.75		;106681/+;6782/+(F)	873.5		;106681/tub80ts;6782/MZ0709 (F)	970.75		; tub80.ts/+;MZ0709/+(F)	1022.5		;106681/+;6782/+(F)	1127.5		;106681/tub80ts;6782/MZ0709 (F)	1098
; tub80.ts/+;MZ0709/+(F)	737.5		;106681/+;6782/+(F)	659.5		;106681/tub80ts;6782/MZ0709 (F)	1021.25		; tub80.ts/+;MZ0709/+(F)	939.5		;106681/+;6782/+(F)	822.5		;106681/tub80ts;6782/MZ0709 (F)	1058.5
; tub80.ts/+;MZ0709/+(F)	693		;106681/+;6782/+(F)	814.5		;106681/tub80ts;6782/MZ0709 (F)	1076.75		; tub80.ts/+;MZ0709/+(F)	787.5		;106681/+;6782/+(F)	1025.5		;106681/tub80ts;6782/MZ0709 (F)	1123.5
; tub80.ts/+;MZ0709/+(F)	782.75		;106681/+;6782/+(F)	892		;106681/tub80ts;6782/MZ0709 (F)	937.75		; tub80.ts/+;MZ0709/+(F)	974		;106681/+;6782/+(F)	1074		;106681/tub80ts;6782/MZ0709 (F)	1047.5
; tub80.ts/+;MZ0709/+(F)	746.5		;106681/+;6782/+(F)	876.75		;106681/tub80ts;6782/MZ0709 (F)	1043.75		; tub80.ts/+;MZ0709/+(F)	699.5		;106681/+;6782/+(F)	1070		;106681/tub80ts;6782/MZ0709 (F)	1092
; tub80.ts/+;MZ0709/+(F)	880		;106681/+;6782/+(F)	927.5		;106681/tub80ts;6782/MZ0709 (F)	998		; tub80.ts/+;MZ0709/+(F)	1021.5		;106681/+;6782/+(F)	1113		;106681/tub80ts;6782/MZ0709 (F)	1125
; tub80.ts/+;MZ0709/+(F)	735.5		;106681/+;6782/+(F)	920.5		;106681/tub80ts;6782/MZ0709 (F)	921.5		; tub80.ts/+;MZ0709/+(F)	993.5		;106681/+;6782/+(F)	1171.5		;106681/tub80ts;6782/MZ0709 (F)	1157.5
; tub80.ts/+;MZ0709/+(F)	936.25		;106681/+;6782/+(F)	832.25		;106681/tub80ts;6782/MZ0709 (F)	977		; tub80.ts/+;MZ0709/+(F)	1076.5		;106681/+;6782/+(F)	1084.5		;106681/tub80ts;6782/MZ0709 (F)	1232
; tub80.ts/+;MZ0709/+(F)	718		;106681/+;6782/+(F)	967		;106681/tub80ts;6782/MZ0709 (F)	945		; tub80.ts/+;MZ0709/+(F)	1023		;106681/+;6782/+(F)	1134		;106681/tub80ts;6782/MZ0709 (F)	1121
; tub80.ts/+;MZ0709/+(F)	555.75		;106681/+;6782/+(F)	707.75		;106681/tub80ts;6782/MZ0709 (F)	1001.5		; tub80.ts/+;MZ0709/+(F)	762		;106681/+;6782/+(F)	1162.5		;106681/tub80ts;6782/MZ0709 (F)	1029.5
; tub80.ts/+;MZ0709/+(F)	699.5		;106681/+;6782/+(F)	721.5		;106681/tub80ts;6782/MZ0709 (F)	893.25		; tub80.ts/+;MZ0709/+(F)	978		;106681/+;6782/+(F)	896		;106681/tub80ts;6782/MZ0709 (F)	1178
; tub80.ts/+;MZ0709/+(F)	782		;106681/+;6782/+(F)	868		;106681/tub80ts;6782/MZ0709 (F)	1144.5		; tub80.ts/+;MZ0709/+(F)	1056		;106681/+;6782/+(F)	1021		;106681/tub80ts;6782/MZ0709 (F)	1014.5
; tub80.ts/+;MZ0709/+(F)	854.667		;106681/+;6782/+(F)	874.333		;106681/tub80ts;6782/MZ0709 (F)	893.333		; tub80.ts/+;MZ0709/+(F)	797		;106681/+;6782/+(F)	950.5		;106681/tub80ts;6782/MZ0709 (F)	764.5
; tub80.ts/+;MZ0709/+(F)	755		;106681/+;6782/+(F)	901.667		;106681/tub80ts;6782/MZ0709 (F)	964.333		; tub80.ts/+;MZ0709/+(F)	933.5		;106681/+;6782/+(F)	1065		;106681/tub80ts;6782/MZ0709 (F)	989
; tub80.ts/+;MZ0709/+(F)	736.333		;106681/+;6782/+(F)	887		;106681/tub80ts;6782/MZ0709 (F)	900.667		; tub80.ts/+;MZ0709/+(F)	467.5		;106681/+;6782/+(F)	935.5		;106681/tub80ts;6782/MZ0709 (F)	849.5
; tub80.ts/+;MZ0709/+(F)	655		;106681/+;6782/+(F)	1175.67		;106681/tub80ts;6782/MZ0709 (F)	897		; tub80.ts/+;MZ0709/+(F)	538.5		;106681/+;6782/+(F)	798.5		;106681/tub80ts;6782/MZ0709 (F)	883.5
; tub80.ts/+;MZ0709/+(F)	730		;106681/+;6782/+(F)	951.667		;106681/tub80ts;6782/MZ0709 (F)	914.333		; tub80.ts/+;MZ0709/+(F)	752.5		;106681/+;6782/+(F)	1054.5		;106681/tub80ts;6782/MZ0709 (F)	981.5
; tub80.ts/+;MZ0709/+(F)	612		;106681/+;6782/+(F)	1046.67		;106681/tub80ts;6782/MZ0709 (F)	1021		; tub80.ts/+;MZ0709/+(F)	566.5		;106681/+;6782/+(F)	947.5		;106681/tub80ts;6782/MZ0709 (F)	838
; tub80.ts/+;MZ0709/+(F)	577.667		;106681/+;6782/+(F)	864.333		;106681/tub80ts;6782/MZ0709 (F)	927.333		; tub80.ts/+;MZ0709/+(F)	886		;106681/+;6782/+(F)	1021		;106681/tub80ts;6782/MZ0709 (F)	829.5
; tub80.ts/+;MZ0709/+(F)	661.333		;106681/+;6782/+(F)	941.333		;106681/tub80ts;6782/MZ0709 (F)	785		; tub80.ts/+;MZ0709/+(F)	709		;106681/+;6782/+(F)	957		;106681/tub80ts;6782/MZ0709 (F)	1037.5
; tub80.ts/+;MZ0709/+(F)	636.667		;106681/+;6782/+(F)	705.333		;106681/tub80ts;6782/MZ0709 (F)	922		; tub80.ts/+;MZ0709/+(F)	698.5		;106681/+;6782/+(F)	801		;106681/tub80ts;6782/MZ0709 (F)	1074.5
; tub80.ts/+;MZ0709/+(F)	789		;106681/+;6782/+(F)	778.667		;106681/tub80ts;6782/MZ0709 (F)	970		; tub80.ts/+;MZ0709/+(F)	630.5		;106681/+;6782/+(F)	1009		;106681/tub80ts;6782/MZ0709 (F)	956.5
; tub80.ts/+;MZ0709/+(F)	754.333		;106681/+;6782/+(F)	907.667		;106681/tub80ts;6782/MZ0709 (F)	1036		; tub80.ts/+;MZ0709/+(F)	1186.5		;106681/+;6782/+(F)	977.5		;106681/tub80ts;6782/MZ0709 (F)	1147
; tub80.ts/+;MZ0709/+(F)	583		;106681/+;6782/+(F)	895.667		;106681/tub80ts;6782/MZ0709 (F)	918.667		; tub80.ts/+;MZ0709/+(F)	580.5		;106681/+;6782/+(F)	846.5		;106681/tub80ts;6782/MZ0709 (F)	903
; tub80.ts/+;MZ0709/+(F)	779.667		;106681/+;6782/+(F)	747.667		;106681/tub80ts;6782/MZ0709 (F)	691.333		; tub80.ts/+;MZ0709/+(F)	692.5		;106681/+;6782/+(F)	1078.5		;106681/tub80ts;6782/MZ0709 (F)	972.5
; tub80.ts/+;MZ0709/+(F)	833		;106681/+;6782/+(F)	763		;106681/tub80ts;6782/MZ0709 (F)	832		; tub80.ts/+;MZ0709/+(F)	770.5		;106681/+;6782/+(F)	1079		;106681/tub80ts;6782/MZ0709 (F)	1161.5
; tub80.ts/+;MZ0709/+(F)	663.333		;106681/+;6782/+(F)	950		;106681/tub80ts;6782/MZ0709 (F)	996.333		; tub80.ts/+;MZ0709/+(F)	786		;106681/+;6782/+(F)	954.5		;106681/tub80ts;6782/MZ0709 (F)	823
; tub80.ts/+;MZ0709/+(F)	759		;106681/+;6782/+(F)	884.667		;106681/tub80ts;6782/MZ0709 (F)	744.667		; tub80.ts/+;MZ0709/+(F)	852.5		;106681/+;6782/+(F)	702		;106681/tub80ts;6782/MZ0709 (F)	1093.5
; tub80.ts/+;MZ0709/+(F)	941.667		;106681/+;6782/+(F)	847.667		;106681/tub80ts;6782/MZ0709 (F)	1085.33		; tub80.ts/+;MZ0709/+(F)	828.5		;106681/+;6782/+(F)	1032.5		;106681/tub80ts;6782/MZ0709 (F)	972
; tub80.ts/+;MZ0709/+(F)	975		;106681/+;6782/+(F)	1034.33		;106681/tub80ts;6782/MZ0709 (F)	918		; tub80.ts/+;MZ0709/+(F)	699		;106681/+;6782/+(F)	868		;106681/tub80ts;6782/MZ0709 (F)	1165.5
; tub80.ts/+;MZ0709/+(F)			;106681/+;6782/+(F)	887		;106681/tub80ts;6782/MZ0709 (F)	1061		; tub80.ts/+;MZ0709/+(F)	720.5		;106681/+;6782/+(F)	1012		;106681/tub80ts;6782/MZ0709 (F)	1095
; tub80.ts/+;MZ0709/+(F)	1022.33		;106681/+;6782/+(F)	981.667		;106681/tub80ts;6782/MZ0709 (F)	1047		; tub80.ts/+;MZ0709/+(F)	647.5		;106681/+;6782/+(F)	961		;106681/tub80ts;6782/MZ0709 (F)	1081.5
; tub80.ts/+;MZ0709/+(F)	857		;106681/+;6782/+(F)	810		;106681/tub80ts;6782/MZ0709 (F)	1093.67		; tub80.ts/+;MZ0709/+(F)	552.5		;106681/+;6782/+(F)	862.5		;106681/tub80ts;6782/MZ0709 (F)	1218
; tub80.ts/+;MZ0709/+(F)	876.667		;106681/+;6782/+(F)	890		;106681/tub80ts;6782/MZ0709 (F)	1096		; tub80.ts/+;MZ0709/+(F)	895.5		;106681/+;6782/+(F)	1191		;106681/tub80ts;6782/MZ0709 (F)	1004.5
; tub80.ts/+;MZ0709/+(F)	942.667		;106681/+;6782/+(F)	1008		;106681/tub80ts;6782/MZ0709 (F)	905		; tub80.ts/+;MZ0709/+(F)	1007		;106681/+;6782/+(F)	1024.5		;106681/tub80ts;6782/MZ0709 (F)	1062.5
; tub80.ts/+;MZ0709/+(F)	1090		;106681/+;6782/+(F)	973.333		;106681/tub80ts;6782/MZ0709 (F)	1031.33		; tub80.ts/+;MZ0709/+(F)	413		;106681/+;6782/+(F)	877.5		;106681/tub80ts;6782/MZ0709 (F)	1099
; tub80.ts/+;MZ0709/+(F)	858.333		;106681/+;6782/+(F)	1085.33		;106681/tub80ts;6782/MZ0709 (F)	980.333		; tub80.ts/+;MZ0709/+(F)	876		;106681/+;6782/+(F)	1117		;106681/tub80ts;6782/MZ0709 (F)	1038.5
; tub80.ts/+;MZ0709/+(F)	966.333		;106681/+;6782/+(F)	835		;106681/tub80ts;6782/MZ0709 (F)	973		; tub80.ts/+;MZ0709/+(F)	940.5		;106681/+;6782/+(F)	1080.5		;106681/tub80ts;6782/MZ0709 (F)	1023
; tub80.ts/+;MZ0709/+(F)	1080.67		;106681/+;6782/+(F)	1057.33		;106681/tub80ts;6782/MZ0709 (F)	1109.33		; tub80.ts/+;MZ0709/+(F)	723.5		;106681/+;6782/+(F)	1007		;106681/tub80ts;6782/MZ0709 (F)	1053.5
; tub80.ts/+;MZ0709/+(F)	875.667		;106681/+;6782/+(F)	1028.33		;106681/tub80ts;6782/MZ0709 (F)	1074.67		; tub80.ts/+;MZ0709/+(F)	985		;106681/+;6782/+(F)	1205		;106681/tub80ts;6782/MZ0709 (F)	1079.5
; tub80.ts/+;MZ0709/+(F)	1030		;106681/+;6782/+(F)	833.667		;106681/tub80ts;6782/MZ0709 (F)	826		; tub80.ts/+;MZ0709/+(F)	872		;106681/+;6782/+(F)	1170		;106681/tub80ts;6782/MZ0709 (F)	978
; tub80.ts/+;MZ0709/+(F)	1081.5		;106681/+;6782/+(F)	1065		;106681/tub80ts;6782/MZ0709 (F)	1042.33		; tub80.ts/+;MZ0709/+(F)	901		;106681/+;6782/+(F)	1120		;106681/tub80ts;6782/MZ0709 (F)	983
; tub80.ts/+;MZ0709/+(F)	826.667		;106681/+;6782/+(F)	1031.33		;106681/tub80ts;6782/MZ0709 (F)	920.333								;106681/tub80ts;6782/MZ0709 (F)	1012
; tub80.ts/+;MZ0709/+(F)	785.333		;106681/+;6782/+(F)	888.667		;106681/tub80ts;6782/MZ0709 (F)	939.333
;NP2222G4/+;tub80.ts/+(F)	858.5		;106681/+;6782/+(F)	957.75		; 106681/NP2222G4;6782/tub80.ts(F)	664		;NP2222G4/+;tub80.ts/+(F)	931.5		;106681/+;6782/+(F)	1195.5		; 106681/NP2222G4;6782/tub80.ts(F)	808
;NP2222G4/+;tub80.ts/+(F)	878.5		;106681/+;6782/+(F)	908.5		; 106681/NP2222G4;6782/tub80.ts(F)	872.75		;NP2222G4/+;tub80.ts/+(F)	1016.5		;106681/+;6782/+(F)	1162		; 106681/NP2222G4;6782/tub80.ts(F)	902.5
;NP2222G4/+;tub80.ts/+(F)	877.25		;106681/+;6782/+(F)	900.75		; 106681/NP2222G4;6782/tub80.ts(F)	1102.25		;NP2222G4/+;tub80.ts/+(F)	951.5		;106681/+;6782/+(F)	1126		; 106681/NP2222G4;6782/tub80.ts(F)	1277
;NP2222G4/+;tub80.ts/+(F)	830.75		;106681/+;6782/+(F)	801.75		; 106681/NP2222G4;6782/tub80.ts(F)	996.25		;NP2222G4/+;tub80.ts/+(F)	1044		;106681/+;6782/+(F)	1103.5		; 106681/NP2222G4;6782/tub80.ts(F)	1173.5
;NP2222G4/+;tub80.ts/+(F)	564		;106681/+;6782/+(F)	873.5		; 106681/NP2222G4;6782/tub80.ts(F)	951.5		;NP2222G4/+;tub80.ts/+(F)	715		;106681/+;6782/+(F)	1127.5		; 106681/NP2222G4;6782/tub80.ts(F)	1077.5
;NP2222G4/+;tub80.ts/+(F)	837		;106681/+;6782/+(F)	659.5		; 106681/NP2222G4;6782/tub80.ts(F)	832		;NP2222G4/+;tub80.ts/+(F)	1067.5		;106681/+;6782/+(F)	822.5		; 106681/NP2222G4;6782/tub80.ts(F)	1140
;NP2222G4/+;tub80.ts/+(F)	888.25		;106681/+;6782/+(F)	814.5		; 106681/NP2222G4;6782/tub80.ts(F)	1091.75		;NP2222G4/+;tub80.ts/+(F)	1121		;106681/+;6782/+(F)	1025.5		; 106681/NP2222G4;6782/tub80.ts(F)	1176.5
;NP2222G4/+;tub80.ts/+(F)	729.5		;106681/+;6782/+(F)	892		; 106681/NP2222G4;6782/tub80.ts(F)	899.25		;NP2222G4/+;tub80.ts/+(F)	956.5		;106681/+;6782/+(F)	1074		; 106681/NP2222G4;6782/tub80.ts(F)	1043
;NP2222G4/+;tub80.ts/+(F)	764		;106681/+;6782/+(F)	876.75		; 106681/NP2222G4;6782/tub80.ts(F)	990.25		;NP2222G4/+;tub80.ts/+(F)	848.5		;106681/+;6782/+(F)	1070		; 106681/NP2222G4;6782/tub80.ts(F)	1003
;NP2222G4/+;tub80.ts/+(F)	788.5		;106681/+;6782/+(F)	927.5		; 106681/NP2222G4;6782/tub80.ts(F)	1007.25		;NP2222G4/+;tub80.ts/+(F)	992		;106681/+;6782/+(F)	1113		; 106681/NP2222G4;6782/tub80.ts(F)	988
;NP2222G4/+;tub80.ts/+(F)	846		;106681/+;6782/+(F)	920.5		; 106681/NP2222G4;6782/tub80.ts(F)	823.5		;NP2222G4/+;tub80.ts/+(F)	1086		;106681/+;6782/+(F)	1171.5		; 106681/NP2222G4;6782/tub80.ts(F)	1086.5
;NP2222G4/+;tub80.ts/+(F)	992.25		;106681/+;6782/+(F)	832.25		; 106681/NP2222G4;6782/tub80.ts(F)	801.25		;NP2222G4/+;tub80.ts/+(F)	966.5		;106681/+;6782/+(F)	1084.5		; 106681/NP2222G4;6782/tub80.ts(F)	980.5
;NP2222G4/+;tub80.ts/+(F)	908.25		;106681/+;6782/+(F)	967		; 106681/NP2222G4;6782/tub80.ts(F)	723.25		;NP2222G4/+;tub80.ts/+(F)	997.5		;106681/+;6782/+(F)	1134		; 106681/NP2222G4;6782/tub80.ts(F)	993
;NP2222G4/+;tub80.ts/+(F)	683.25		;106681/+;6782/+(F)	707.75		; 106681/NP2222G4;6782/tub80.ts(F)	996		;NP2222G4/+;tub80.ts/+(F)	874		;106681/+;6782/+(F)	1162.5		; 106681/NP2222G4;6782/tub80.ts(F)	1241.5
;NP2222G4/+;tub80.ts/+(F)	973		;106681/+;6782/+(F)	721.5		; 106681/NP2222G4;6782/tub80.ts(F)	913.25		;NP2222G4/+;tub80.ts/+(F)	1061		;106681/+;6782/+(F)	896		; 106681/NP2222G4;6782/tub80.ts(F)	1061
;NP2222G4/+;tub80.ts/+(F)	957.75		;106681/+;6782/+(F)	868		; 106681/NP2222G4;6782/tub80.ts(F)	866.5		;NP2222G4/+;tub80.ts/+(F)	1166		;106681/+;6782/+(F)	1021		; 106681/NP2222G4;6782/tub80.ts(F)	935.5
;NP2222G4/+;tub80.ts/+(F)	731		;106681/+;6782/+(F)	874.333		; 106681/NP2222G4;6782/tub80.ts(F)	869.667		;NP2222G4/+;tub80.ts/+(F)	955.5		;106681/+;6782/+(F)	950.5		; 106681/NP2222G4;6782/tub80.ts(F)	975
;NP2222G4/+;tub80.ts/+(F)	764		;106681/+;6782/+(F)	901.667		; 106681/NP2222G4;6782/tub80.ts(F)	1007		;NP2222G4/+;tub80.ts/+(F)	594		;106681/+;6782/+(F)	1065		; 106681/NP2222G4;6782/tub80.ts(F)	1041.5
;NP2222G4/+;tub80.ts/+(F)	845.667		;106681/+;6782/+(F)	887		; 106681/NP2222G4;6782/tub80.ts(F)	924		;NP2222G4/+;tub80.ts/+(F)	823		;106681/+;6782/+(F)	935.5		; 106681/NP2222G4;6782/tub80.ts(F)	1190
;NP2222G4/+;tub80.ts/+(F)	867.667		;106681/+;6782/+(F)	1175.67		; 106681/NP2222G4;6782/tub80.ts(F)	901.667		;NP2222G4/+;tub80.ts/+(F)	689.5		;106681/+;6782/+(F)	798.5		; 106681/NP2222G4;6782/tub80.ts(F)	1005.5
;NP2222G4/+;tub80.ts/+(F)	736.667		;106681/+;6782/+(F)	951.667		; 106681/NP2222G4;6782/tub80.ts(F)	792.333		;NP2222G4/+;tub80.ts/+(F)	713		;106681/+;6782/+(F)	1054.5		; 106681/NP2222G4;6782/tub80.ts(F)	859
;NP2222G4/+;tub80.ts/+(F)	867		;106681/+;6782/+(F)	1046.67		; 106681/NP2222G4;6782/tub80.ts(F)	712		;NP2222G4/+;tub80.ts/+(F)	899		;106681/+;6782/+(F)	947.5		; 106681/NP2222G4;6782/tub80.ts(F)	957
;NP2222G4/+;tub80.ts/+(F)	908		;106681/+;6782/+(F)	864.333		; 106681/NP2222G4;6782/tub80.ts(F)	852		;NP2222G4/+;tub80.ts/+(F)	789.5		;106681/+;6782/+(F)	1021		; 106681/NP2222G4;6782/tub80.ts(F)	782
;NP2222G4/+;tub80.ts/+(F)	734.333		;106681/+;6782/+(F)	941.333		; 106681/NP2222G4;6782/tub80.ts(F)	775		;NP2222G4/+;tub80.ts/+(F)	991.5		;106681/+;6782/+(F)	957		; 106681/NP2222G4;6782/tub80.ts(F)	1114
;NP2222G4/+;tub80.ts/+(F)	866.333		;106681/+;6782/+(F)	705.333		; 106681/NP2222G4;6782/tub80.ts(F)	896.333		;NP2222G4/+;tub80.ts/+(F)	750		;106681/+;6782/+(F)	801		; 106681/NP2222G4;6782/tub80.ts(F)	869.5
;NP2222G4/+;tub80.ts/+(F)	794.333		;106681/+;6782/+(F)	778.667		; 106681/NP2222G4;6782/tub80.ts(F)	655		;NP2222G4/+;tub80.ts/+(F)	842		;106681/+;6782/+(F)	1009		; 106681/NP2222G4;6782/tub80.ts(F)	1364
;NP2222G4/+;tub80.ts/+(F)	774.333		;106681/+;6782/+(F)	907.667		; 106681/NP2222G4;6782/tub80.ts(F)	1072		;NP2222G4/+;tub80.ts/+(F)	1065.5		;106681/+;6782/+(F)	977.5		; 106681/NP2222G4;6782/tub80.ts(F)	951
;NP2222G4/+;tub80.ts/+(F)	827.333		;106681/+;6782/+(F)	895.667		; 106681/NP2222G4;6782/tub80.ts(F)	808.333		;NP2222G4/+;tub80.ts/+(F)	963.5		;106681/+;6782/+(F)	846.5		; 106681/NP2222G4;6782/tub80.ts(F)	1129.5
;NP2222G4/+;tub80.ts/+(F)	751		;106681/+;6782/+(F)	747.667		; 106681/NP2222G4;6782/tub80.ts(F)	941.333		;NP2222G4/+;tub80.ts/+(F)	713.5		;106681/+;6782/+(F)	1078.5		; 106681/NP2222G4;6782/tub80.ts(F)	1083
;NP2222G4/+;tub80.ts/+(F)	772.333		;106681/+;6782/+(F)	763		; 106681/NP2222G4;6782/tub80.ts(F)	862.333		;NP2222G4/+;tub80.ts/+(F)	674.5		;106681/+;6782/+(F)	1079		; 106681/NP2222G4;6782/tub80.ts(F)	994
;NP2222G4/+;tub80.ts/+(F)	786		;106681/+;6782/+(F)	950		; 106681/NP2222G4;6782/tub80.ts(F)	890.667		;NP2222G4/+;tub80.ts/+(F)	611		;106681/+;6782/+(F)	954.5		; 106681/NP2222G4;6782/tub80.ts(F)	1000
;NP2222G4/+;tub80.ts/+(F)	802.333		;106681/+;6782/+(F)	884.667		; 106681/NP2222G4;6782/tub80.ts(F)	874.667		;NP2222G4/+;tub80.ts/+(F)	658		;106681/+;6782/+(F)	702		; 106681/NP2222G4;6782/tub80.ts(F)	832.5
;NP2222G4/+;tub80.ts/+(F)	932.333		;106681/+;6782/+(F)	847.667		; 106681/NP2222G4;6782/tub80.ts(F)	842.333		;NP2222G4/+;tub80.ts/+(F)	1063		;106681/+;6782/+(F)	1032.5		; 106681/NP2222G4;6782/tub80.ts(F)	946.5
;NP2222G4/+;tub80.ts/+(F)	845.667		;106681/+;6782/+(F)	1034.33		; 106681/NP2222G4;6782/tub80.ts(F)	817		;NP2222G4/+;tub80.ts/+(F)	915.5		;106681/+;6782/+(F)	868		; 106681/NP2222G4;6782/tub80.ts(F)	947
;NP2222G4/+;tub80.ts/+(F)	832.667		;106681/+;6782/+(F)	887		; 106681/NP2222G4;6782/tub80.ts(F)	915		;NP2222G4/+;tub80.ts/+(F)	835		;106681/+;6782/+(F)	1012		; 106681/NP2222G4;6782/tub80.ts(F)	1182.5
;NP2222G4/+;tub80.ts/+(F)	784.333		;106681/+;6782/+(F)	981.667		; 106681/NP2222G4;6782/tub80.ts(F)	1106.33		;NP2222G4/+;tub80.ts/+(F)	991		;106681/+;6782/+(F)	961		; 106681/NP2222G4;6782/tub80.ts(F)	994.5
;NP2222G4/+;tub80.ts/+(F)	930.333		;106681/+;6782/+(F)	810		; 106681/NP2222G4;6782/tub80.ts(F)	923		;NP2222G4/+;tub80.ts/+(F)	1207.5		;106681/+;6782/+(F)	862.5		; 106681/NP2222G4;6782/tub80.ts(F)	1198.5
;NP2222G4/+;tub80.ts/+(F)	793.333		;106681/+;6782/+(F)	890		; 106681/NP2222G4;6782/tub80.ts(F)	1042.33		;NP2222G4/+;tub80.ts/+(F)	851.5		;106681/+;6782/+(F)	1191		; 106681/NP2222G4;6782/tub80.ts(F)	1190
;NP2222G4/+;tub80.ts/+(F)	699.333		;106681/+;6782/+(F)	1008		; 106681/NP2222G4;6782/tub80.ts(F)	1061.33		;NP2222G4/+;tub80.ts/+(F)	834		;106681/+;6782/+(F)	1024.5		; 106681/NP2222G4;6782/tub80.ts(F)	1213
;NP2222G4/+;tub80.ts/+(F)	985		;106681/+;6782/+(F)	973.333		; 106681/NP2222G4;6782/tub80.ts(F)	944.667		;NP2222G4/+;tub80.ts/+(F)	1021		;106681/+;6782/+(F)	877.5		; 106681/NP2222G4;6782/tub80.ts(F)	1186.5
;NP2222G4/+;tub80.ts/+(F)	619.333		;106681/+;6782/+(F)	1085.33		; 106681/NP2222G4;6782/tub80.ts(F)	1077		;NP2222G4/+;tub80.ts/+(F)	663		;106681/+;6782/+(F)	1117		; 106681/NP2222G4;6782/tub80.ts(F)	1100.5
;NP2222G4/+;tub80.ts/+(F)	753.333		;106681/+;6782/+(F)	835		; 106681/NP2222G4;6782/tub80.ts(F)	1022.67		;NP2222G4/+;tub80.ts/+(F)	796.5		;106681/+;6782/+(F)	1080.5		; 106681/NP2222G4;6782/tub80.ts(F)	1045
;NP2222G4/+;tub80.ts/+(F)	829.667		;106681/+;6782/+(F)	1057.33		; 106681/NP2222G4;6782/tub80.ts(F)	991.667		;NP2222G4/+;tub80.ts/+(F)	1078		;106681/+;6782/+(F)	1007		; 106681/NP2222G4;6782/tub80.ts(F)	1157.5
;NP2222G4/+;tub80.ts/+(F)	933.667		;106681/+;6782/+(F)	1028.33		; 106681/NP2222G4;6782/tub80.ts(F)	1180		;NP2222G4/+;tub80.ts/+(F)	1062.5		;106681/+;6782/+(F)	1205		; 106681/NP2222G4;6782/tub80.ts(F)	1223.5
;NP2222G4/+;tub80.ts/+(F)	864		;106681/+;6782/+(F)	833.667		; 106681/NP2222G4;6782/tub80.ts(F)	940.667		;NP2222G4/+;tub80.ts/+(F)	867.5		;106681/+;6782/+(F)	1170		; 106681/NP2222G4;6782/tub80.ts(F)	1044
;NP2222G4/+;tub80.ts/+(F)	744.333		;106681/+;6782/+(F)	1065		; 106681/NP2222G4;6782/tub80.ts(F)	853.333		;NP2222G4/+;tub80.ts/+(F)	918.5		;106681/+;6782/+(F)	1120		; 106681/NP2222G4;6782/tub80.ts(F)	1002
;NP2222G4/+;tub80.ts/+(F)	647		;106681/+;6782/+(F)	1031.33		; 106681/NP2222G4;6782/tub80.ts(F)	785		;NP2222G4/+;tub80.ts/+(F)	440					; 106681/NP2222G4;6782/tub80.ts(F)	1157
;NP2222G4/+;tub80.ts/+(F)	942		;106681/+;6782/+(F)	888.667		; 106681/NP2222G4;6782/tub80.ts(F)	687.667		;NP2222G4/+;tub80.ts/+(F)	856
; EaatG4/+; tub80.ts/+(F)	775.25		;106681/+;6782/+(F)	957.75		;106681/EaatG4;6782/tub80.ts(F)	710.75		; EaatG4/+; tub80.ts/+(F)	875		;106681/+;6782/+(F)	1195.5		;106681/EaatG4;6782/tub80.ts(F)	953
; EaatG4/+; tub80.ts/+(F)	756		;106681/+;6782/+(F)	908.5		;106681/EaatG4;6782/tub80.ts(F)	827.25		; EaatG4/+; tub80.ts/+(F)	994		;106681/+;6782/+(F)	1162		;106681/EaatG4;6782/tub80.ts(F)	887
; EaatG4/+; tub80.ts/+(F)	547		;106681/+;6782/+(F)	900.75		;106681/EaatG4;6782/tub80.ts(F)	954		; EaatG4/+; tub80.ts/+(F)	724		;106681/+;6782/+(F)	1126		;106681/EaatG4;6782/tub80.ts(F)	954.5
; EaatG4/+; tub80.ts/+(F)	770.5		;106681/+;6782/+(F)	801.75		;106681/EaatG4;6782/tub80.ts(F)	816		; EaatG4/+; tub80.ts/+(F)	1181		;106681/+;6782/+(F)	1103.5		;106681/EaatG4;6782/tub80.ts(F)	1080.5
; EaatG4/+; tub80.ts/+(F)	645.75		;106681/+;6782/+(F)	873.5		;106681/EaatG4;6782/tub80.ts(F)	899.25		; EaatG4/+; tub80.ts/+(F)	878		;106681/+;6782/+(F)	1127.5		;106681/EaatG4;6782/tub80.ts(F)	976.5
; EaatG4/+; tub80.ts/+(F)	698.5		;106681/+;6782/+(F)	659.5		;106681/EaatG4;6782/tub80.ts(F)	985		; EaatG4/+; tub80.ts/+(F)	1010		;106681/+;6782/+(F)	822.5		;106681/EaatG4;6782/tub80.ts(F)	867
; EaatG4/+; tub80.ts/+(F)	854.75		;106681/+;6782/+(F)	814.5		;106681/EaatG4;6782/tub80.ts(F)	845.5		; EaatG4/+; tub80.ts/+(F)	1025		;106681/+;6782/+(F)	1025.5		;106681/EaatG4;6782/tub80.ts(F)	1009.5
; EaatG4/+; tub80.ts/+(F)	774.75		;106681/+;6782/+(F)	892		;106681/EaatG4;6782/tub80.ts(F)	896.75		; EaatG4/+; tub80.ts/+(F)	787.5		;106681/+;6782/+(F)	1074		;106681/EaatG4;6782/tub80.ts(F)	884.5
; EaatG4/+; tub80.ts/+(F)	831.25		;106681/+;6782/+(F)	876.75		;106681/EaatG4;6782/tub80.ts(F)	636.25		; EaatG4/+; tub80.ts/+(F)	955		;106681/+;6782/+(F)	1070		;106681/EaatG4;6782/tub80.ts(F)	903.5
; EaatG4/+; tub80.ts/+(F)	615.5		;106681/+;6782/+(F)	927.5		;106681/EaatG4;6782/tub80.ts(F)	956.5		; EaatG4/+; tub80.ts/+(F)	875.5		;106681/+;6782/+(F)	1113		;106681/EaatG4;6782/tub80.ts(F)	972.5
; EaatG4/+; tub80.ts/+(F)	791.75		;106681/+;6782/+(F)	920.5		;106681/EaatG4;6782/tub80.ts(F)	748		; EaatG4/+; tub80.ts/+(F)	1083		;106681/+;6782/+(F)	1171.5		;106681/EaatG4;6782/tub80.ts(F)	914.5
; EaatG4/+; tub80.ts/+(F)	654.75		;106681/+;6782/+(F)	832.25		;106681/EaatG4;6782/tub80.ts(F)	1059.5		; EaatG4/+; tub80.ts/+(F)	891		;106681/+;6782/+(F)	1084.5		;106681/EaatG4;6782/tub80.ts(F)	1150.5
; EaatG4/+; tub80.ts/+(F)	644.5		;106681/+;6782/+(F)	967		;106681/EaatG4;6782/tub80.ts(F)	685.75		; EaatG4/+; tub80.ts/+(F)	853.5		;106681/+;6782/+(F)	1134		;106681/EaatG4;6782/tub80.ts(F)	1051.5
; EaatG4/+; tub80.ts/+(F)	811.5		;106681/+;6782/+(F)	707.75		;106681/EaatG4;6782/tub80.ts(F)	615.25		; EaatG4/+; tub80.ts/+(F)	925		;106681/+;6782/+(F)	1162.5		;106681/EaatG4;6782/tub80.ts(F)	785
; EaatG4/+; tub80.ts/+(F)	744.5		;106681/+;6782/+(F)	721.5		;106681/EaatG4;6782/tub80.ts(F)	689.75		; EaatG4/+; tub80.ts/+(F)	1045		;106681/+;6782/+(F)	896		;106681/EaatG4;6782/tub80.ts(F)	820.5
; EaatG4/+; tub80.ts/+(F)	616.25		;106681/+;6782/+(F)	868		;106681/EaatG4;6782/tub80.ts(F)	810.75		; EaatG4/+; tub80.ts/+(F)	694.5		;106681/+;6782/+(F)	1021		;106681/EaatG4;6782/tub80.ts(F)	1009.5
; EaatG4/+; tub80.ts/+(F)	787.333		;106681/+;6782/+(F)	874.333		;106681/EaatG4;6782/tub80.ts(F)	798.667		; EaatG4/+; tub80.ts/+(F)	573		;106681/+;6782/+(F)	950.5		;106681/EaatG4;6782/tub80.ts(F)	900
; EaatG4/+; tub80.ts/+(F)	816		;106681/+;6782/+(F)	901.667		;106681/EaatG4;6782/tub80.ts(F)	632		; EaatG4/+; tub80.ts/+(F)	855		;106681/+;6782/+(F)	1065		;106681/EaatG4;6782/tub80.ts(F)	804.5
; EaatG4/+; tub80.ts/+(F)	706.333		;106681/+;6782/+(F)	887		;106681/EaatG4;6782/tub80.ts(F)	780.667		; EaatG4/+; tub80.ts/+(F)	723		;106681/+;6782/+(F)	935.5		;106681/EaatG4;6782/tub80.ts(F)	846
; EaatG4/+; tub80.ts/+(F)	753		;106681/+;6782/+(F)	1175.67		;106681/EaatG4;6782/tub80.ts(F)	695.667		; EaatG4/+; tub80.ts/+(F)	792.5		;106681/+;6782/+(F)	798.5		;106681/EaatG4;6782/tub80.ts(F)	819.5
; EaatG4/+; tub80.ts/+(F)	815		;106681/+;6782/+(F)	951.667		;106681/EaatG4;6782/tub80.ts(F)	700.333		; EaatG4/+; tub80.ts/+(F)	546		;106681/+;6782/+(F)	1054.5		;106681/EaatG4;6782/tub80.ts(F)	970.5
; EaatG4/+; tub80.ts/+(F)	1004.67		;106681/+;6782/+(F)	1046.67		;106681/EaatG4;6782/tub80.ts(F)	838.333		; EaatG4/+; tub80.ts/+(F)	477.5		;106681/+;6782/+(F)	947.5		;106681/EaatG4;6782/tub80.ts(F)	1118
; EaatG4/+; tub80.ts/+(F)	688		;106681/+;6782/+(F)	864.333		;106681/EaatG4;6782/tub80.ts(F)	737.333		; EaatG4/+; tub80.ts/+(F)	688.5		;106681/+;6782/+(F)	1021		;106681/EaatG4;6782/tub80.ts(F)	888.5
; EaatG4/+; tub80.ts/+(F)	735.333		;106681/+;6782/+(F)	941.333		;106681/EaatG4;6782/tub80.ts(F)	727.333		; EaatG4/+; tub80.ts/+(F)	626		;106681/+;6782/+(F)	957		;106681/EaatG4;6782/tub80.ts(F)	875.5
; EaatG4/+; tub80.ts/+(F)	737		;106681/+;6782/+(F)	705.333		;106681/EaatG4;6782/tub80.ts(F)	539.333		; EaatG4/+; tub80.ts/+(F)	670		;106681/+;6782/+(F)	801		;106681/EaatG4;6782/tub80.ts(F)	783
; EaatG4/+; tub80.ts/+(F)	703		;106681/+;6782/+(F)	778.667		;106681/EaatG4;6782/tub80.ts(F)	664		; EaatG4/+; tub80.ts/+(F)	446.5		;106681/+;6782/+(F)	1009		;106681/EaatG4;6782/tub80.ts(F)	694
; EaatG4/+; tub80.ts/+(F)	747		;106681/+;6782/+(F)	907.667		;106681/EaatG4;6782/tub80.ts(F)	635.667		; EaatG4/+; tub80.ts/+(F)	845.5		;106681/+;6782/+(F)	977.5		;106681/EaatG4;6782/tub80.ts(F)	719.5
; EaatG4/+; tub80.ts/+(F)	754		;106681/+;6782/+(F)	895.667		;106681/EaatG4;6782/tub80.ts(F)	605.333		; EaatG4/+; tub80.ts/+(F)	605.5		;106681/+;6782/+(F)	846.5		;106681/EaatG4;6782/tub80.ts(F)	651
; EaatG4/+; tub80.ts/+(F)	670.667		;106681/+;6782/+(F)	747.667		;106681/EaatG4;6782/tub80.ts(F)	555.667		; EaatG4/+; tub80.ts/+(F)	1162.5		;106681/+;6782/+(F)	1078.5		;106681/EaatG4;6782/tub80.ts(F)	891.5
; EaatG4/+; tub80.ts/+(F)	978		;106681/+;6782/+(F)	763		;106681/EaatG4;6782/tub80.ts(F)	672.333		; EaatG4/+; tub80.ts/+(F)	576		;106681/+;6782/+(F)	1079		;106681/EaatG4;6782/tub80.ts(F)	713.5
; EaatG4/+; tub80.ts/+(F)	730.333		;106681/+;6782/+(F)	950		;106681/EaatG4;6782/tub80.ts(F)	480		; EaatG4/+; tub80.ts/+(F)	875.5		;106681/+;6782/+(F)	954.5		;106681/EaatG4;6782/tub80.ts(F)	668.5
; EaatG4/+; tub80.ts/+(F)	871.667		;106681/+;6782/+(F)	884.667		;106681/EaatG4;6782/tub80.ts(F)	609.667		; EaatG4/+; tub80.ts/+(F)	766.5		;106681/+;6782/+(F)	702		;106681/EaatG4;6782/tub80.ts(F)	890.5
; EaatG4/+; tub80.ts/+(F)	795		;106681/+;6782/+(F)	847.667		;106681/EaatG4;6782/tub80.ts(F)	836.333		; EaatG4/+; tub80.ts/+(F)	607		;106681/+;6782/+(F)	1032.5		;106681/EaatG4;6782/tub80.ts(F)	873.5
; EaatG4/+; tub80.ts/+(F)	860.333		;106681/+;6782/+(F)	1034.33		;106681/EaatG4;6782/tub80.ts(F)	981		; EaatG4/+; tub80.ts/+(F)	584		;106681/+;6782/+(F)	868		;106681/EaatG4;6782/tub80.ts(F)	1078.5
; EaatG4/+; tub80.ts/+(F)	900.667		;106681/+;6782/+(F)	887		;106681/EaatG4;6782/tub80.ts(F)	967		; EaatG4/+; tub80.ts/+(F)	610		;106681/+;6782/+(F)	1012		;106681/EaatG4;6782/tub80.ts(F)	997
; EaatG4/+; tub80.ts/+(F)	710.667		;106681/+;6782/+(F)	981.667		;106681/EaatG4;6782/tub80.ts(F)	713.333		; EaatG4/+; tub80.ts/+(F)	804.5		;106681/+;6782/+(F)	961		;106681/EaatG4;6782/tub80.ts(F)	763
; EaatG4/+; tub80.ts/+(F)	827		;106681/+;6782/+(F)	810		;106681/EaatG4;6782/tub80.ts(F)	819.333		; EaatG4/+; tub80.ts/+(F)	678		;106681/+;6782/+(F)	862.5		;106681/EaatG4;6782/tub80.ts(F)	922
; EaatG4/+; tub80.ts/+(F)	884.333		;106681/+;6782/+(F)	890		;106681/EaatG4;6782/tub80.ts(F)	802		; EaatG4/+; tub80.ts/+(F)	438		;106681/+;6782/+(F)	1191		;106681/EaatG4;6782/tub80.ts(F)	1042
; EaatG4/+; tub80.ts/+(F)	588.667		;106681/+;6782/+(F)	1008		;106681/EaatG4;6782/tub80.ts(F)	806.667		; EaatG4/+; tub80.ts/+(F)	627.5		;106681/+;6782/+(F)	1024.5		;106681/EaatG4;6782/tub80.ts(F)	858
; EaatG4/+; tub80.ts/+(F)	729		;106681/+;6782/+(F)	973.333		;106681/EaatG4;6782/tub80.ts(F)	919.333		; EaatG4/+; tub80.ts/+(F)	711		;106681/+;6782/+(F)			;106681/EaatG4;6782/tub80.ts(F)	882
; EaatG4/+; tub80.ts/+(F)	757.333		;106681/+;6782/+(F)	1085.33		;106681/EaatG4;6782/tub80.ts(F)	920.333		; EaatG4/+; tub80.ts/+(F)	910.5		;106681/+;6782/+(F)	877.5		;106681/EaatG4;6782/tub80.ts(F)	943.5
; EaatG4/+; tub80.ts/+(F)	866.667		;106681/+;6782/+(F)	835		;106681/EaatG4;6782/tub80.ts(F)	920.667		; EaatG4/+; tub80.ts/+(F)	673.5		;106681/+;6782/+(F)	1117		;106681/EaatG4;6782/tub80.ts(F)	906.5
; EaatG4/+; tub80.ts/+(F)	956.333		;106681/+;6782/+(F)	1057.33		;106681/EaatG4;6782/tub80.ts(F)	1023		; EaatG4/+; tub80.ts/+(F)	845		;106681/+;6782/+(F)	1080.5		;106681/EaatG4;6782/tub80.ts(F)	1030.5
; EaatG4/+; tub80.ts/+(F)	799.333		;106681/+;6782/+(F)	1028.33		;106681/EaatG4;6782/tub80.ts(F)	828.333		; EaatG4/+; tub80.ts/+(F)	529.5		;106681/+;6782/+(F)	1007		;106681/EaatG4;6782/tub80.ts(F)	735
; EaatG4/+; tub80.ts/+(F)	747		;106681/+;6782/+(F)	833.667		;106681/EaatG4;6782/tub80.ts(F)	661.333		; EaatG4/+; tub80.ts/+(F)	668		;106681/+;6782/+(F)	1205		;106681/EaatG4;6782/tub80.ts(F)	892.5
; EaatG4/+; tub80.ts/+(F)	732		;106681/+;6782/+(F)	1065		;106681/EaatG4;6782/tub80.ts(F)	854.333		; EaatG4/+; tub80.ts/+(F)	650		;106681/+;6782/+(F)	1170		;106681/EaatG4;6782/tub80.ts(F)	958.5
; EaatG4/+; tub80.ts/+(F)	788.333		;106681/+;6782/+(F)	1031.33		;106681/EaatG4;6782/tub80.ts(F)	711		; EaatG4/+; tub80.ts/+(F)	900		;106681/+;6782/+(F)	1120		;106681/EaatG4;6782/tub80.ts(F)	772.5
; EaatG4/+; tub80.ts/+(F)	757.333		;106681/+;6782/+(F)	888.667		;106681/EaatG4;6782/tub80.ts(F)	975								;106681/EaatG4;6782/tub80.ts(F)	1025
; tub80.ts/+;MZ0709/+(F)	676.5		;;52658/+(F)	829		;tub80ts/+;52658/MZ0709 (F)	720		; tub80.ts/+;MZ0709/+(F)	824		;;52658/+(F)	1134.5		;tub80ts/+;52658/MZ0709 (F)	906.5
; tub80.ts/+;MZ0709/+(F)	657		;;52658/+(F)	1047.5		;tub80ts/+;52658/MZ0709 (F)	745.5		; tub80.ts/+;MZ0709/+(F)	787.5		;;52658/+(F)	1089		;tub80ts/+;52658/MZ0709 (F)	752.5
; tub80.ts/+;MZ0709/+(F)	1006.75		;;52658/+(F)	957.75		;tub80ts/+;52658/MZ0709 (F)	776.25		; tub80.ts/+;MZ0709/+(F)	1004		;;52658/+(F)	1254		;tub80ts/+;52658/MZ0709 (F)	1046.5
; tub80.ts/+;MZ0709/+(F)	784.5		;;52658/+(F)	831		;tub80ts/+;52658/MZ0709 (F)	899.25		; tub80.ts/+;MZ0709/+(F)	892.5		;;52658/+(F)	938		;tub80ts/+;52658/MZ0709 (F)	918
; tub80.ts/+;MZ0709/+(F)	748.75		;;52658/+(F)	852.5		;tub80ts/+;52658/MZ0709 (F)	861.25		; tub80.ts/+;MZ0709/+(F)	1022.5		;;52658/+(F)	1301		;tub80ts/+;52658/MZ0709 (F)	982
; tub80.ts/+;MZ0709/+(F)	737.5		;;52658/+(F)	928.5		;tub80ts/+;52658/MZ0709 (F)	833.5		; tub80.ts/+;MZ0709/+(F)	939.5		;;52658/+(F)	1095		;tub80ts/+;52658/MZ0709 (F)	909.5
; tub80.ts/+;MZ0709/+(F)	693		;;52658/+(F)	864		;tub80ts/+;52658/MZ0709 (F)	1136		; tub80.ts/+;MZ0709/+(F)	787.5		;;52658/+(F)	1012		;tub80ts/+;52658/MZ0709 (F)	1014.5
; tub80.ts/+;MZ0709/+(F)	782.75		;;52658/+(F)	999.25		;tub80ts/+;52658/MZ0709 (F)	974.75		; tub80.ts/+;MZ0709/+(F)	974		;;52658/+(F)	1055.5		;tub80ts/+;52658/MZ0709 (F)	1061.5
; tub80.ts/+;MZ0709/+(F)	746.5		;;52658/+(F)	877.25		;tub80ts/+;52658/MZ0709 (F)	713.5		; tub80.ts/+;MZ0709/+(F)	699.5		;;52658/+(F)	1180		;tub80ts/+;52658/MZ0709 (F)	848
; tub80.ts/+;MZ0709/+(F)	880		;;52658/+(F)	641.75		;tub80ts/+;52658/MZ0709 (F)	890		; tub80.ts/+;MZ0709/+(F)	1021.5		;;52658/+(F)	1133.5		;tub80ts/+;52658/MZ0709 (F)	969.5
; tub80.ts/+;MZ0709/+(F)	735.5		;;52658/+(F)	1126.5		;tub80ts/+;52658/MZ0709 (F)	1074		; tub80.ts/+;MZ0709/+(F)	993.5		;;52658/+(F)	1042		;tub80ts/+;52658/MZ0709 (F)	1041.5
; tub80.ts/+;MZ0709/+(F)	936.25		;;52658/+(F)	830.25		;tub80ts/+;52658/MZ0709 (F)	1054.75		; tub80.ts/+;MZ0709/+(F)	1076.5		;;52658/+(F)	1034.5		;tub80ts/+;52658/MZ0709 (F)	1076
; tub80.ts/+;MZ0709/+(F)	718		;;52658/+(F)	716		;tub80ts/+;52658/MZ0709 (F)	889.5		; tub80.ts/+;MZ0709/+(F)	1023		;;52658/+(F)	1010		;tub80ts/+;52658/MZ0709 (F)	999
; tub80.ts/+;MZ0709/+(F)	555.75		;;52658/+(F)	983.5		;tub80ts/+;52658/MZ0709 (F)	818		; tub80.ts/+;MZ0709/+(F)	762		;;52658/+(F)	1097.5		;tub80ts/+;52658/MZ0709 (F)	852
; tub80.ts/+;MZ0709/+(F)	699.5		;;52658/+(F)	686.25		;tub80ts/+;52658/MZ0709 (F)	886.75		; tub80.ts/+;MZ0709/+(F)	978		;;52658/+(F)	1072		;tub80ts/+;52658/MZ0709 (F)	1126.5
; tub80.ts/+;MZ0709/+(F)	782		;;52658/+(F)	912.25		;tub80ts/+;52658/MZ0709 (F)	873		; tub80.ts/+;MZ0709/+(F)	1056		;;52658/+(F)	682.5		;tub80ts/+;52658/MZ0709 (F)	912
; tub80.ts/+;MZ0709/+(F)	854.667		;;52658/+(F)	710.667		;tub80ts/+;52658/MZ0709 (F)	792.667		; tub80.ts/+;MZ0709/+(F)	797		;;52658/+(F)	811.5		;tub80ts/+;52658/MZ0709 (F)	803.5
; tub80.ts/+;MZ0709/+(F)	755		;;52658/+(F)	966.667		;tub80ts/+;52658/MZ0709 (F)	745.333		; tub80.ts/+;MZ0709/+(F)	933.5		;;52658/+(F)	1241		;tub80ts/+;52658/MZ0709 (F)	852.5
; tub80.ts/+;MZ0709/+(F)	736.333		;;52658/+(F)	1000		;tub80ts/+;52658/MZ0709 (F)	812.333		; tub80.ts/+;MZ0709/+(F)	467.5		;;52658/+(F)	702		;tub80ts/+;52658/MZ0709 (F)	709
; tub80.ts/+;MZ0709/+(F)	655		;;52658/+(F)	767.667		;tub80ts/+;52658/MZ0709 (F)	944.333		; tub80.ts/+;MZ0709/+(F)	538.5		;;52658/+(F)	960		;tub80ts/+;52658/MZ0709 (F)	948.5
; tub80.ts/+;MZ0709/+(F)	730		;;52658/+(F)	915.667		;tub80ts/+;52658/MZ0709 (F)	723		; tub80.ts/+;MZ0709/+(F)	752.5		;;52658/+(F)	1091.5		;tub80ts/+;52658/MZ0709 (F)	1062.5
; tub80.ts/+;MZ0709/+(F)	612		;;52658/+(F)	979.333		;tub80ts/+;52658/MZ0709 (F)	1023		; tub80.ts/+;MZ0709/+(F)	566.5		;;52658/+(F)	602		;tub80ts/+;52658/MZ0709 (F)	1067.5
; tub80.ts/+;MZ0709/+(F)	577.667		;;52658/+(F)	747.667		;tub80ts/+;52658/MZ0709 (F)	761.667		; tub80.ts/+;MZ0709/+(F)	886		;;52658/+(F)	961		;tub80ts/+;52658/MZ0709 (F)	1020.5
; tub80.ts/+;MZ0709/+(F)	661.333		;;52658/+(F)	751.333		;tub80ts/+;52658/MZ0709 (F)	742		; tub80.ts/+;MZ0709/+(F)	709		;;52658/+(F)	742.5		;tub80ts/+;52658/MZ0709 (F)	883
; tub80.ts/+;MZ0709/+(F)	636.667		;;52658/+(F)	722.333		;tub80ts/+;52658/MZ0709 (F)	921		; tub80.ts/+;MZ0709/+(F)	698.5		;;52658/+(F)	697		;tub80ts/+;52658/MZ0709 (F)	1295
; tub80.ts/+;MZ0709/+(F)	789		;;52658/+(F)	837.333		;tub80ts/+;52658/MZ0709 (F)	622.333		; tub80.ts/+;MZ0709/+(F)	630.5		;;52658/+(F)	1355		;tub80ts/+;52658/MZ0709 (F)	599.5
; tub80.ts/+;MZ0709/+(F)	754.333		;;52658/+(F)	935.333		;tub80ts/+;52658/MZ0709 (F)	1010.33		; tub80.ts/+;MZ0709/+(F)	1186.5		;;52658/+(F)	722		;tub80ts/+;52658/MZ0709 (F)	908.5
; tub80.ts/+;MZ0709/+(F)	583		;;52658/+(F)	724.333		;tub80ts/+;52658/MZ0709 (F)	924		; tub80.ts/+;MZ0709/+(F)	580.5		;;52658/+(F)	753		;tub80ts/+;52658/MZ0709 (F)	816.5
; tub80.ts/+;MZ0709/+(F)	779.667		;;52658/+(F)	675.667		;tub80ts/+;52658/MZ0709 (F)	726		; tub80.ts/+;MZ0709/+(F)	692.5		;;52658/+(F)	927		;tub80ts/+;52658/MZ0709 (F)	700.5
; tub80.ts/+;MZ0709/+(F)	833		;;52658/+(F)	870.333		;tub80ts/+;52658/MZ0709 (F)	961.333		; tub80.ts/+;MZ0709/+(F)	770.5		;;52658/+(F)	1172		;tub80ts/+;52658/MZ0709 (F)	923
; tub80.ts/+;MZ0709/+(F)	663.333		;;52658/+(F)	753.333		;tub80ts/+;52658/MZ0709 (F)	666		; tub80.ts/+;MZ0709/+(F)	786		;;52658/+(F)	1029.5		;tub80ts/+;52658/MZ0709 (F)	494.5
; tub80.ts/+;MZ0709/+(F)	759		;;52658/+(F)	853		;tub80ts/+;52658/MZ0709 (F)	724		; tub80.ts/+;MZ0709/+(F)	852.5		;;52658/+(F)	790		;tub80ts/+;52658/MZ0709 (F)	846
; tub80.ts/+;MZ0709/+(F)	941.667		;;52658/+(F)	871.333		;tub80ts/+;52658/MZ0709 (F)	905.667		; tub80.ts/+;MZ0709/+(F)	828.5		;;52658/+(F)	785		;tub80ts/+;52658/MZ0709 (F)	931
; tub80.ts/+;MZ0709/+(F)	975		;;52658/+(F)	1012		;tub80ts/+;52658/MZ0709 (F)	1118		; tub80.ts/+;MZ0709/+(F)	699		;;52658/+(F)	1043		;tub80ts/+;52658/MZ0709 (F)	984.5
; tub80.ts/+;MZ0709/+(F)	1022.33		;;52658/+(F)	947.667		;tub80ts/+;52658/MZ0709 (F)	1140.33		; tub80.ts/+;MZ0709/+(F)	720.5		;;52658/+(F)	828.5		;tub80ts/+;52658/MZ0709 (F)	1111.5
; tub80.ts/+;MZ0709/+(F)	857		;;52658/+(F)	964.667		;tub80ts/+;52658/MZ0709 (F)	1028		; tub80.ts/+;MZ0709/+(F)	647.5		;;52658/+(F)	1059.5		;tub80ts/+;52658/MZ0709 (F)	1057.5
; tub80.ts/+;MZ0709/+(F)	876.667		;;52658/+(F)	978		;tub80ts/+;52658/MZ0709 (F)	971		; tub80.ts/+;MZ0709/+(F)	552.5		;;52658/+(F)	690.5		;tub80ts/+;52658/MZ0709 (F)	1013
; tub80.ts/+;MZ0709/+(F)	942.667		;;52658/+(F)	769.667		;tub80ts/+;52658/MZ0709 (F)	1041.33		; tub80.ts/+;MZ0709/+(F)	895.5		;;52658/+(F)	1232		;tub80ts/+;52658/MZ0709 (F)	1000
; tub80.ts/+;MZ0709/+(F)	1090		;;52658/+(F)	995.333		;tub80ts/+;52658/MZ0709 (F)	1139		; tub80.ts/+;MZ0709/+(F)	1007		;;52658/+(F)	1107		;tub80ts/+;52658/MZ0709 (F)	1074
; tub80.ts/+;MZ0709/+(F)	858.333		;;52658/+(F)	953.333		;tub80ts/+;52658/MZ0709 (F)	710.667		; tub80.ts/+;MZ0709/+(F)	413		;;52658/+(F)	997		;tub80ts/+;52658/MZ0709 (F)	664
; tub80.ts/+;MZ0709/+(F)	966.333		;;52658/+(F)	1001.67		;tub80ts/+;52658/MZ0709 (F)	854.333		; tub80.ts/+;MZ0709/+(F)	876		;;52658/+(F)	1092		;tub80ts/+;52658/MZ0709 (F)	912
; tub80.ts/+;MZ0709/+(F)	1080.67		;;52658/+(F)	1087.67		;tub80ts/+;52658/MZ0709 (F)	1032		; tub80.ts/+;MZ0709/+(F)	940.5		;;52658/+(F)	943.5		;tub80ts/+;52658/MZ0709 (F)	792.5
; tub80.ts/+;MZ0709/+(F)	875.667		;;52658/+(F)	969.667		;tub80ts/+;52658/MZ0709 (F)	710.667		; tub80.ts/+;MZ0709/+(F)	723.5		;;52658/+(F)	1084		;tub80ts/+;52658/MZ0709 (F)	720
; tub80.ts/+;MZ0709/+(F)	1030		;;52658/+(F)	924.667		;tub80ts/+;52658/MZ0709 (F)	903.667		; tub80.ts/+;MZ0709/+(F)	985		;;52658/+(F)	1143.5		;tub80ts/+;52658/MZ0709 (F)	844.5
; tub80.ts/+;MZ0709/+(F)	1081.5		;;52658/+(F)	976		;tub80ts/+;52658/MZ0709 (F)	790		; tub80.ts/+;MZ0709/+(F)	872		;;52658/+(F)	930.5		;tub80ts/+;52658/MZ0709 (F)	935
; tub80.ts/+;MZ0709/+(F)	826.667		;;52658/+(F)	805		;tub80ts/+;52658/MZ0709 (F)	972		; tub80.ts/+;MZ0709/+(F)	901		;;52658/+(F)	1024		;tub80ts/+;52658/MZ0709 (F)	1037
; tub80.ts/+;MZ0709/+(F)	785.333		;;52658/+(F)	873		;tub80ts/+;52658/MZ0709 (F)	833					;;52658/+(F)	1220.5		;tub80ts/+;52658/MZ0709 (F)	847
			;;52658/+(F)	1010		;tub80ts/+;52658/MZ0709 (F)	1027.33								;tub80ts/+;52658/MZ0709 (F)	1136.5
;NP2222G4/+;tub80.ts/+(F)	858.5		;;52658/+(F)	829		;NP2222G4/+;52658/tub80.ts(F)	727.75		;NP2222G4/+;tub80.ts/+(F)	931.5		;;52658/+(F)	1134.5		;NP2222G4/+;52658/tub80.ts(F)	808.5
;NP2222G4/+;tub80.ts/+(F)	878.5		;;52658/+(F)	1047.5		;NP2222G4/+;52658/tub80.ts(F)	931.75		;NP2222G4/+;tub80.ts/+(F)	1016.5		;;52658/+(F)	1089		;NP2222G4/+;52658/tub80.ts(F)	1130.5
;NP2222G4/+;tub80.ts/+(F)	877.25		;;52658/+(F)	957.75		;NP2222G4/+;52658/tub80.ts(F)	924		;NP2222G4/+;tub80.ts/+(F)	951.5		;;52658/+(F)	1254		;NP2222G4/+;52658/tub80.ts(F)	1036
;NP2222G4/+;tub80.ts/+(F)	830.75		;;52658/+(F)	831		;NP2222G4/+;52658/tub80.ts(F)	921.75		;NP2222G4/+;tub80.ts/+(F)	1044		;;52658/+(F)	938		;NP2222G4/+;52658/tub80.ts(F)	1178.5
;NP2222G4/+;tub80.ts/+(F)	564		;;52658/+(F)	852.5		;NP2222G4/+;52658/tub80.ts(F)	1170.25		;NP2222G4/+;tub80.ts/+(F)	715		;;52658/+(F)	1301		;NP2222G4/+;52658/tub80.ts(F)	849
;NP2222G4/+;tub80.ts/+(F)	837		;;52658/+(F)	928.5		;NP2222G4/+;52658/tub80.ts(F)	684		;NP2222G4/+;tub80.ts/+(F)	1067.5		;;52658/+(F)	1095		;NP2222G4/+;52658/tub80.ts(F)	917.5
;NP2222G4/+;tub80.ts/+(F)	888.25		;;52658/+(F)	864		;NP2222G4/+;52658/tub80.ts(F)	691.25		;NP2222G4/+;tub80.ts/+(F)	1121		;;52658/+(F)	1012		;NP2222G4/+;52658/tub80.ts(F)	1105
;NP2222G4/+;tub80.ts/+(F)	729.5		;;52658/+(F)	999.25		;NP2222G4/+;52658/tub80.ts(F)	893.25		;NP2222G4/+;tub80.ts/+(F)	956.5		;;52658/+(F)	1055.5		;NP2222G4/+;52658/tub80.ts(F)	841
;NP2222G4/+;tub80.ts/+(F)	764		;;52658/+(F)	877.25		;NP2222G4/+;52658/tub80.ts(F)	921.25		;NP2222G4/+;tub80.ts/+(F)	848.5		;;52658/+(F)	1180		;NP2222G4/+;52658/tub80.ts(F)	821
;NP2222G4/+;tub80.ts/+(F)	788.5		;;52658/+(F)	641.75		;NP2222G4/+;52658/tub80.ts(F)	648.25		;NP2222G4/+;tub80.ts/+(F)	992		;;52658/+(F)	1133.5		;NP2222G4/+;52658/tub80.ts(F)	1037.5
;NP2222G4/+;tub80.ts/+(F)	846		;;52658/+(F)	1126.5		;NP2222G4/+;52658/tub80.ts(F)	976.25		;NP2222G4/+;tub80.ts/+(F)	1086		;;52658/+(F)	1042		;NP2222G4/+;52658/tub80.ts(F)	816
;NP2222G4/+;tub80.ts/+(F)	992.25		;;52658/+(F)	830.25		;NP2222G4/+;52658/tub80.ts(F)	764.25		;NP2222G4/+;tub80.ts/+(F)	966.5		;;52658/+(F)	1034.5		;NP2222G4/+;52658/tub80.ts(F)	957.5
;NP2222G4/+;tub80.ts/+(F)	908.25		;;52658/+(F)	716		;NP2222G4/+;52658/tub80.ts(F)	889.75		;NP2222G4/+;tub80.ts/+(F)	997.5		;;52658/+(F)	1010		;NP2222G4/+;52658/tub80.ts(F)	982
;NP2222G4/+;tub80.ts/+(F)	683.25		;;52658/+(F)	983.5		;NP2222G4/+;52658/tub80.ts(F)	862.25		;NP2222G4/+;tub80.ts/+(F)	874		;;52658/+(F)	1097.5		;NP2222G4/+;52658/tub80.ts(F)	940
;NP2222G4/+;tub80.ts/+(F)	973		;;52658/+(F)	686.25		;NP2222G4/+;52658/tub80.ts(F)	828		;NP2222G4/+;tub80.ts/+(F)	1061		;;52658/+(F)	1072		;NP2222G4/+;52658/tub80.ts(F)	1021.5
;NP2222G4/+;tub80.ts/+(F)	957.75		;;52658/+(F)	912.25		;NP2222G4/+;52658/tub80.ts(F)	710.75		;NP2222G4/+;tub80.ts/+(F)	1166		;;52658/+(F)	682.5		;NP2222G4/+;52658/tub80.ts(F)	977
;NP2222G4/+;tub80.ts/+(F)	731		;;52658/+(F)	710.667		;NP2222G4/+;52658/tub80.ts(F)	826.667		;NP2222G4/+;tub80.ts/+(F)	955.5		;;52658/+(F)	811.5		;NP2222G4/+;52658/tub80.ts(F)	1126.5
;NP2222G4/+;tub80.ts/+(F)	764		;;52658/+(F)	966.667		;NP2222G4/+;52658/tub80.ts(F)	1153		;NP2222G4/+;tub80.ts/+(F)	594		;;52658/+(F)	1241		;NP2222G4/+;52658/tub80.ts(F)	1223.5
;NP2222G4/+;tub80.ts/+(F)	845.667		;;52658/+(F)	1000		;NP2222G4/+;52658/tub80.ts(F)	727.667		;NP2222G4/+;tub80.ts/+(F)	823		;;52658/+(F)	702		;NP2222G4/+;52658/tub80.ts(F)	1188.5
;NP2222G4/+;tub80.ts/+(F)	867.667		;;52658/+(F)	767.667		;NP2222G4/+;52658/tub80.ts(F)	1040.33		;NP2222G4/+;tub80.ts/+(F)	689.5		;;52658/+(F)	960		;NP2222G4/+;52658/tub80.ts(F)	1238
;NP2222G4/+;tub80.ts/+(F)	736.667		;;52658/+(F)	915.667		;NP2222G4/+;52658/tub80.ts(F)	913.667		;NP2222G4/+;tub80.ts/+(F)	713		;;52658/+(F)	1091.5		;NP2222G4/+;52658/tub80.ts(F)	722.5
;NP2222G4/+;tub80.ts/+(F)	867		;;52658/+(F)	979.333		;NP2222G4/+;52658/tub80.ts(F)	628		;NP2222G4/+;tub80.ts/+(F)	899		;;52658/+(F)	602		;NP2222G4/+;52658/tub80.ts(F)	987
;NP2222G4/+;tub80.ts/+(F)	908		;;52658/+(F)	747.667		;NP2222G4/+;52658/tub80.ts(F)	964.667		;NP2222G4/+;tub80.ts/+(F)	789.5		;;52658/+(F)	961		;NP2222G4/+;52658/tub80.ts(F)	1197
;NP2222G4/+;tub80.ts/+(F)	734.333		;;52658/+(F)	751.333		;NP2222G4/+;52658/tub80.ts(F)	1204		;NP2222G4/+;tub80.ts/+(F)	991.5		;;52658/+(F)	742.5		;NP2222G4/+;52658/tub80.ts(F)	980
;NP2222G4/+;tub80.ts/+(F)	866.333		;;52658/+(F)	722.333		;NP2222G4/+;52658/tub80.ts(F)	1241		;NP2222G4/+;tub80.ts/+(F)	750		;;52658/+(F)	697		;NP2222G4/+;52658/tub80.ts(F)	813
;NP2222G4/+;tub80.ts/+(F)	794.333		;;52658/+(F)	837.333		;NP2222G4/+;52658/tub80.ts(F)	820		;NP2222G4/+;tub80.ts/+(F)	842		;;52658/+(F)	1355		;NP2222G4/+;52658/tub80.ts(F)	746.5
;NP2222G4/+;tub80.ts/+(F)	774.333		;;52658/+(F)	935.333		;NP2222G4/+;52658/tub80.ts(F)	837		;NP2222G4/+;tub80.ts/+(F)	1065.5		;;52658/+(F)	722		;NP2222G4/+;52658/tub80.ts(F)	1000.5
;NP2222G4/+;tub80.ts/+(F)	827.333		;;52658/+(F)	724.333		;NP2222G4/+;52658/tub80.ts(F)	782.667		;NP2222G4/+;tub80.ts/+(F)	963.5		;;52658/+(F)	753		;NP2222G4/+;52658/tub80.ts(F)	764.5
;NP2222G4/+;tub80.ts/+(F)	751		;;52658/+(F)	675.667		;NP2222G4/+;52658/tub80.ts(F)	714		;NP2222G4/+;tub80.ts/+(F)	713.5		;;52658/+(F)	927		;NP2222G4/+;52658/tub80.ts(F)	965.5
;NP2222G4/+;tub80.ts/+(F)	772.333		;;52658/+(F)	870.333		;NP2222G4/+;52658/tub80.ts(F)	682.333		;NP2222G4/+;tub80.ts/+(F)	674.5		;;52658/+(F)	1172		;NP2222G4/+;52658/tub80.ts(F)	1096
;NP2222G4/+;tub80.ts/+(F)	786		;;52658/+(F)	753.333		;NP2222G4/+;52658/tub80.ts(F)	798.333		;NP2222G4/+;tub80.ts/+(F)	611		;;52658/+(F)	1029.5		;NP2222G4/+;52658/tub80.ts(F)	339.5
;NP2222G4/+;tub80.ts/+(F)	802.333		;;52658/+(F)	853		;NP2222G4/+;52658/tub80.ts(F)	746.667		;NP2222G4/+;tub80.ts/+(F)	658		;;52658/+(F)	790		;NP2222G4/+;52658/tub80.ts(F)	1009.5
;NP2222G4/+;tub80.ts/+(F)	932.333		;;52658/+(F)	871.333		;NP2222G4/+;52658/tub80.ts(F)	769.333		;NP2222G4/+;tub80.ts/+(F)	1063		;;52658/+(F)	785		;NP2222G4/+;52658/tub80.ts(F)	1093
;NP2222G4/+;tub80.ts/+(F)	845.667		;;52658/+(F)	1012		;NP2222G4/+;52658/tub80.ts(F)	1033.67		;NP2222G4/+;tub80.ts/+(F)	915.5		;;52658/+(F)	1043		;NP2222G4/+;52658/tub80.ts(F)	931
;NP2222G4/+;tub80.ts/+(F)	832.667		;;52658/+(F)	947.667		;NP2222G4/+;52658/tub80.ts(F)	1030.33		;NP2222G4/+;tub80.ts/+(F)	835		;;52658/+(F)	828.5		;NP2222G4/+;52658/tub80.ts(F)	896.5
;NP2222G4/+;tub80.ts/+(F)	784.333		;;52658/+(F)	964.667		;NP2222G4/+;52658/tub80.ts(F)	564.333		;NP2222G4/+;tub80.ts/+(F)	991		;;52658/+(F)	1059.5		;NP2222G4/+;52658/tub80.ts(F)	1042.5
;NP2222G4/+;tub80.ts/+(F)	930.333		;;52658/+(F)	978		;NP2222G4/+;52658/tub80.ts(F)	1023		;NP2222G4/+;tub80.ts/+(F)	1207.5		;;52658/+(F)	690.5		;NP2222G4/+;52658/tub80.ts(F)	1022.5
;NP2222G4/+;tub80.ts/+(F)	793.333		;;52658/+(F)	769.667		;NP2222G4/+;52658/tub80.ts(F)	896.667		;NP2222G4/+;tub80.ts/+(F)	851.5		;;52658/+(F)	1232		;NP2222G4/+;52658/tub80.ts(F)	1138.5
;NP2222G4/+;tub80.ts/+(F)	699.333		;;52658/+(F)	995.333		;NP2222G4/+;52658/tub80.ts(F)	938		;NP2222G4/+;tub80.ts/+(F)	834		;;52658/+(F)	1107		;NP2222G4/+;52658/tub80.ts(F)	869
;NP2222G4/+;tub80.ts/+(F)	985		;;52658/+(F)	953.333		;NP2222G4/+;52658/tub80.ts(F)	937		;NP2222G4/+;tub80.ts/+(F)	1021		;;52658/+(F)	997		;NP2222G4/+;52658/tub80.ts(F)	757
;NP2222G4/+;tub80.ts/+(F)	619.333		;;52658/+(F)	1001.67		;NP2222G4/+;52658/tub80.ts(F)	975		;NP2222G4/+;tub80.ts/+(F)	663		;;52658/+(F)	1092		;NP2222G4/+;52658/tub80.ts(F)	878
;NP2222G4/+;tub80.ts/+(F)	753.333		;;52658/+(F)	1087.67		;NP2222G4/+;52658/tub80.ts(F)	927.333		;NP2222G4/+;tub80.ts/+(F)	796.5		;;52658/+(F)	943.5		;NP2222G4/+;52658/tub80.ts(F)	1242
;NP2222G4/+;tub80.ts/+(F)	829.667		;;52658/+(F)	969.667		;NP2222G4/+;52658/tub80.ts(F)	764.333		;NP2222G4/+;tub80.ts/+(F)	1078		;;52658/+(F)	1084		;NP2222G4/+;52658/tub80.ts(F)	965
;NP2222G4/+;tub80.ts/+(F)	933.667		;;52658/+(F)	924.667		;NP2222G4/+;52658/tub80.ts(F)	1089.67		;NP2222G4/+;tub80.ts/+(F)	1062.5		;;52658/+(F)	1143.5		;NP2222G4/+;52658/tub80.ts(F)	799.5
;NP2222G4/+;tub80.ts/+(F)	864		;;52658/+(F)	976		;NP2222G4/+;52658/tub80.ts(F)	1001		;NP2222G4/+;tub80.ts/+(F)	867.5		;;52658/+(F)	930.5		;NP2222G4/+;52658/tub80.ts(F)	1062.5
;NP2222G4/+;tub80.ts/+(F)	744.333		;;52658/+(F)	805		;NP2222G4/+;52658/tub80.ts(F)	975		;NP2222G4/+;tub80.ts/+(F)	918.5		;;52658/+(F)	1024		;NP2222G4/+;52658/tub80.ts(F)	897
;NP2222G4/+;tub80.ts/+(F)	647		;;52658/+(F)	873		;NP2222G4/+;52658/tub80.ts(F)	838		;NP2222G4/+;tub80.ts/+(F)	440		;;52658/+(F)	1220.5
;NP2222G4/+;tub80.ts/+(F)	942		;;52658/+(F)	1010		;NP2222G4/+;52658/tub80.ts(F)	944.667		;NP2222G4/+;tub80.ts/+(F)	856
; EaatG4/+; tub80.ts/+(F)	775.25		;;52658/+(F)	829		;EaatG4/+;52658/tub80.ts(F)	939.5		; EaatG4/+; tub80.ts/+(F)	875		;;52658/+(F)	1134.5		;EaatG4/+;52658/tub80.ts(F)	891
; EaatG4/+; tub80.ts/+(F)	756		;;52658/+(F)	1047.5		;EaatG4/+;52658/tub80.ts(F)	857.5		; EaatG4/+; tub80.ts/+(F)	994		;;52658/+(F)	1089		;EaatG4/+;52658/tub80.ts(F)	949.5
; EaatG4/+; tub80.ts/+(F)	547		;;52658/+(F)	957.75		;EaatG4/+;52658/tub80.ts(F)	769.75		; EaatG4/+; tub80.ts/+(F)	724		;;52658/+(F)	1254		;EaatG4/+;52658/tub80.ts(F)	1067
; EaatG4/+; tub80.ts/+(F)	770.5		;;52658/+(F)	831		;EaatG4/+;52658/tub80.ts(F)	976		; EaatG4/+; tub80.ts/+(F)	1181		;;52658/+(F)	938		;EaatG4/+;52658/tub80.ts(F)	790
; EaatG4/+; tub80.ts/+(F)	645.75		;;52658/+(F)	852.5		;EaatG4/+;52658/tub80.ts(F)	634.5		; EaatG4/+; tub80.ts/+(F)	878		;;52658/+(F)	1301		;EaatG4/+;52658/tub80.ts(F)	1096
; EaatG4/+; tub80.ts/+(F)	698.5		;;52658/+(F)	928.5		;EaatG4/+;52658/tub80.ts(F)	670		; EaatG4/+; tub80.ts/+(F)	1010		;;52658/+(F)	1095		;EaatG4/+;52658/tub80.ts(F)	1047
; EaatG4/+; tub80.ts/+(F)	854.75		;;52658/+(F)	864		;EaatG4/+;52658/tub80.ts(F)	698.25		; EaatG4/+; tub80.ts/+(F)	1025		;;52658/+(F)	1012		;EaatG4/+;52658/tub80.ts(F)	1006.5
; EaatG4/+; tub80.ts/+(F)	774.75		;;52658/+(F)	999.25		;EaatG4/+;52658/tub80.ts(F)	957.5		; EaatG4/+; tub80.ts/+(F)	787.5		;;52658/+(F)	1055.5		;EaatG4/+;52658/tub80.ts(F)	904
; EaatG4/+; tub80.ts/+(F)	831.25		;;52658/+(F)	877.25		;EaatG4/+;52658/tub80.ts(F)	979.75		; EaatG4/+; tub80.ts/+(F)	955		;;52658/+(F)	1180		;EaatG4/+;52658/tub80.ts(F)	929
; EaatG4/+; tub80.ts/+(F)	615.5		;;52658/+(F)	641.75		;EaatG4/+;52658/tub80.ts(F)	832.75		; EaatG4/+; tub80.ts/+(F)	875.5		;;52658/+(F)	1133.5		;EaatG4/+;52658/tub80.ts(F)	704
; EaatG4/+; tub80.ts/+(F)	791.75		;;52658/+(F)	1126.5		;EaatG4/+;52658/tub80.ts(F)	579		; EaatG4/+; tub80.ts/+(F)	1083		;;52658/+(F)	1042		;EaatG4/+;52658/tub80.ts(F)	758.5
; EaatG4/+; tub80.ts/+(F)	654.75		;;52658/+(F)	830.25		;EaatG4/+;52658/tub80.ts(F)	749.75		; EaatG4/+; tub80.ts/+(F)	891		;;52658/+(F)	1034.5		;EaatG4/+;52658/tub80.ts(F)	877
; EaatG4/+; tub80.ts/+(F)	644.5		;;52658/+(F)	716		;EaatG4/+;52658/tub80.ts(F)	546.25		; EaatG4/+; tub80.ts/+(F)	853.5		;;52658/+(F)	1010		;EaatG4/+;52658/tub80.ts(F)	857.5
; EaatG4/+; tub80.ts/+(F)	811.5		;;52658/+(F)	983.5		;EaatG4/+;52658/tub80.ts(F)	914.25		; EaatG4/+; tub80.ts/+(F)	925		;;52658/+(F)	1097.5		;EaatG4/+;52658/tub80.ts(F)	753
; EaatG4/+; tub80.ts/+(F)	744.5		;;52658/+(F)	686.25		;EaatG4/+;52658/tub80.ts(F)	685.25		; EaatG4/+; tub80.ts/+(F)	1045		;;52658/+(F)	1072		;EaatG4/+;52658/tub80.ts(F)	766
; EaatG4/+; tub80.ts/+(F)	616.25		;;52658/+(F)	912.25		;EaatG4/+;52658/tub80.ts(F)	680.5		; EaatG4/+; tub80.ts/+(F)	694.5		;;52658/+(F)	682.5		;EaatG4/+;52658/tub80.ts(F)	884.5
; EaatG4/+; tub80.ts/+(F)	787.333		;;52658/+(F)	710.667		;EaatG4/+;52658/tub80.ts(F)	970		; EaatG4/+; tub80.ts/+(F)	573		;;52658/+(F)	811.5		;EaatG4/+;52658/tub80.ts(F)	453.5
; EaatG4/+; tub80.ts/+(F)	816		;;52658/+(F)	966.667		;EaatG4/+;52658/tub80.ts(F)	470.667		; EaatG4/+; tub80.ts/+(F)	855		;;52658/+(F)	1241		;EaatG4/+;52658/tub80.ts(F)	1095
; EaatG4/+; tub80.ts/+(F)	706.333		;;52658/+(F)	1000		;EaatG4/+;52658/tub80.ts(F)	645		; EaatG4/+; tub80.ts/+(F)	723		;;52658/+(F)	702		;EaatG4/+;52658/tub80.ts(F)	848
; EaatG4/+; tub80.ts/+(F)	753		;;52658/+(F)	767.667		;EaatG4/+;52658/tub80.ts(F)	773.667		; EaatG4/+; tub80.ts/+(F)	792.5		;;52658/+(F)	960		;EaatG4/+;52658/tub80.ts(F)	631
; EaatG4/+; tub80.ts/+(F)	815		;;52658/+(F)	915.667		;EaatG4/+;52658/tub80.ts(F)	637		; EaatG4/+; tub80.ts/+(F)	546		;;52658/+(F)	1091.5		;EaatG4/+;52658/tub80.ts(F)	892
; EaatG4/+; tub80.ts/+(F)	1004.67		;;52658/+(F)	979.333		;EaatG4/+;52658/tub80.ts(F)	600.333		; EaatG4/+; tub80.ts/+(F)	477.5		;;52658/+(F)	602		;EaatG4/+;52658/tub80.ts(F)	480.5
; EaatG4/+; tub80.ts/+(F)	688		;;52658/+(F)	747.667		;EaatG4/+;52658/tub80.ts(F)	732.333		; EaatG4/+; tub80.ts/+(F)	688.5		;;52658/+(F)	961		;EaatG4/+;52658/tub80.ts(F)	470.5
; EaatG4/+; tub80.ts/+(F)	735.333		;;52658/+(F)	751.333		;EaatG4/+;52658/tub80.ts(F)	663.333		; EaatG4/+; tub80.ts/+(F)	626		;;52658/+(F)	742.5		;EaatG4/+;52658/tub80.ts(F)	743
; EaatG4/+; tub80.ts/+(F)	737		;;52658/+(F)	722.333		;EaatG4/+;52658/tub80.ts(F)	605		; EaatG4/+; tub80.ts/+(F)	670		;;52658/+(F)	697		;EaatG4/+;52658/tub80.ts(F)	422.5
; EaatG4/+; tub80.ts/+(F)	703		;;52658/+(F)	837.333		;EaatG4/+;52658/tub80.ts(F)	676.667		; EaatG4/+; tub80.ts/+(F)	446.5		;;52658/+(F)	1355		;EaatG4/+;52658/tub80.ts(F)	756.5
; EaatG4/+; tub80.ts/+(F)	747		;;52658/+(F)	935.333		;EaatG4/+;52658/tub80.ts(F)	1109		; EaatG4/+; tub80.ts/+(F)	845.5		;;52658/+(F)	722		;EaatG4/+;52658/tub80.ts(F)	931
; EaatG4/+; tub80.ts/+(F)	754		;;52658/+(F)	724.333		;EaatG4/+;52658/tub80.ts(F)	700.333		; EaatG4/+; tub80.ts/+(F)	605.5		;;52658/+(F)	753		;EaatG4/+;52658/tub80.ts(F)	662
; EaatG4/+; tub80.ts/+(F)	670.667		;;52658/+(F)	675.667		;EaatG4/+;52658/tub80.ts(F)	896.333		; EaatG4/+; tub80.ts/+(F)	1162.5		;;52658/+(F)	927		;EaatG4/+;52658/tub80.ts(F)	603
; EaatG4/+; tub80.ts/+(F)	978		;;52658/+(F)	870.333		;EaatG4/+;52658/tub80.ts(F)	754		; EaatG4/+; tub80.ts/+(F)	576		;;52658/+(F)	1172		;EaatG4/+;52658/tub80.ts(F)	635
; EaatG4/+; tub80.ts/+(F)	730.333		;;52658/+(F)	753.333		;EaatG4/+;52658/tub80.ts(F)	773.667		; EaatG4/+; tub80.ts/+(F)	875.5		;;52658/+(F)	1029.5		;EaatG4/+;52658/tub80.ts(F)	467
; EaatG4/+; tub80.ts/+(F)	871.667		;;52658/+(F)	853		;EaatG4/+;52658/tub80.ts(F)	635		; EaatG4/+; tub80.ts/+(F)	766.5		;;52658/+(F)	790		;EaatG4/+;52658/tub80.ts(F)	837
; EaatG4/+; tub80.ts/+(F)	795		;;52658/+(F)	871.333		;EaatG4/+;52658/tub80.ts(F)	710.333		; EaatG4/+; tub80.ts/+(F)	607		;;52658/+(F)	785		;EaatG4/+;52658/tub80.ts(F)	800
; EaatG4/+; tub80.ts/+(F)	860.333		;;52658/+(F)	1012		;EaatG4/+;52658/tub80.ts(F)	737		; EaatG4/+; tub80.ts/+(F)	584		;;52658/+(F)	1043		;EaatG4/+;52658/tub80.ts(F)	910.5
; EaatG4/+; tub80.ts/+(F)	900.667		;;52658/+(F)	947.667		;EaatG4/+;52658/tub80.ts(F)	688		; EaatG4/+; tub80.ts/+(F)	610		;;52658/+(F)	828.5		;EaatG4/+;52658/tub80.ts(F)	865
; EaatG4/+; tub80.ts/+(F)	710.667		;;52658/+(F)	964.667		;EaatG4/+;52658/tub80.ts(F)	1008.33		; EaatG4/+; tub80.ts/+(F)	804.5		;;52658/+(F)	1059.5		;EaatG4/+;52658/tub80.ts(F)	845
; EaatG4/+; tub80.ts/+(F)	827		;;52658/+(F)	978		;EaatG4/+;52658/tub80.ts(F)	1009.67		; EaatG4/+; tub80.ts/+(F)	678		;;52658/+(F)	690.5		;EaatG4/+;52658/tub80.ts(F)	738.5
; EaatG4/+; tub80.ts/+(F)	884.333		;;52658/+(F)	769.667		;EaatG4/+;52658/tub80.ts(F)	769		; EaatG4/+; tub80.ts/+(F)	438		;;52658/+(F)	1232		;EaatG4/+;52658/tub80.ts(F)	711
; EaatG4/+; tub80.ts/+(F)	588.667		;;52658/+(F)	995.333		;EaatG4/+;52658/tub80.ts(F)	772.667		; EaatG4/+; tub80.ts/+(F)	627.5		;;52658/+(F)	1107		;EaatG4/+;52658/tub80.ts(F)	895.5
; EaatG4/+; tub80.ts/+(F)	729		;;52658/+(F)	953.333		;EaatG4/+;52658/tub80.ts(F)	783		; EaatG4/+; tub80.ts/+(F)	711		;;52658/+(F)	997		;EaatG4/+;52658/tub80.ts(F)	801.5
; EaatG4/+; tub80.ts/+(F)	757.333		;;52658/+(F)	1001.67		;EaatG4/+;52658/tub80.ts(F)	648.333		; EaatG4/+; tub80.ts/+(F)	910.5		;;52658/+(F)	1092		;EaatG4/+;52658/tub80.ts(F)	943.5
; EaatG4/+; tub80.ts/+(F)	866.667		;;52658/+(F)	1087.67		;EaatG4/+;52658/tub80.ts(F)	797.333		; EaatG4/+; tub80.ts/+(F)	673.5		;;52658/+(F)	943.5		;EaatG4/+;52658/tub80.ts(F)	619
; EaatG4/+; tub80.ts/+(F)	956.333		;;52658/+(F)	969.667		;EaatG4/+;52658/tub80.ts(F)	872.667		; EaatG4/+; tub80.ts/+(F)	845		;;52658/+(F)	1084		;EaatG4/+;52658/tub80.ts(F)	881.5
; EaatG4/+; tub80.ts/+(F)	799.333		;;52658/+(F)	924.667		;EaatG4/+;52658/tub80.ts(F)	663		; EaatG4/+; tub80.ts/+(F)	529.5		;;52658/+(F)	1143.5		;EaatG4/+;52658/tub80.ts(F)	889.5
; EaatG4/+; tub80.ts/+(F)	747		;;52658/+(F)	976		;EaatG4/+;52658/tub80.ts(F)	625		; EaatG4/+; tub80.ts/+(F)	668		;;52658/+(F)	930.5		;EaatG4/+;52658/tub80.ts(F)	625
; EaatG4/+; tub80.ts/+(F)	732		;;52658/+(F)	805		;EaatG4/+;52658/tub80.ts(F)	845.333		; EaatG4/+; tub80.ts/+(F)	650		;;52658/+(F)	1024		;EaatG4/+;52658/tub80.ts(F)	920
; EaatG4/+; tub80.ts/+(F)	788.333		;;52658/+(F)	873		;EaatG4/+;52658/tub80.ts(F)	860.667		; EaatG4/+; tub80.ts/+(F)	900		;;52658/+(F)	1220.5
; EaatG4/+; tub80.ts/+(F)	757.333		;;52658/+(F)	1010		;EaatG4/+;52658/tub80.ts(F)	797.667
