# Supplementary material for: Modulation of sleep by trafficking of lipids through the Drosophila blood-brain barrier
Source: eLife. 2023 May 4;12:e86336. doi: 10.7554/eLife.86336 (PMC10205086; doi:10.7554/eLife.86336)
Supplement: Figure 4—figure supplement 6—source data 1. [file elife-86336-fig4-figsupp6-data1.xlsx]

## Sheet: Sheet1
Orct	relative cDNA level(ddCT)		Orct2	relative cDNA level(ddCT)
;47133/Act G4	0.575315		;1176/Act G4	0.625107
;47133/Act G4	0.651813		;1176/Act G4	0.899865
;47133/Act G4	0.851449		;1176/Act G4	0.690036
;52658/Act G4	2.34612		;106681/Act G4;6782/+	0.382375
;52658/Act G4	1.58096		;106681/Act G4;6782/+	0.733842
;52658/Act G4	1.96757		;106681/Act G4;6782/+	0.500224
;60125/Act G4	1.08122		Iso31	1.26124
;60125/Act G4	0.862183		Iso31	0.763573
;60125/Act G4	1.37458		Iso31	1.03837
;106681/Act G4;6782/+	0.387991
;106681/Act G4;6782/+	0.256728
;106681/Act G4;6782/+	0.320738
Iso31	1.28327
Iso31	0.624483
Iso31	0.679267
