# Supplementary material for: Modulation of sleep by trafficking of lipids through the Drosophila blood-brain barrier
Source: eLife. 2023 May 4;12:e86336. doi: 10.7554/eLife.86336 (PMC10205086; doi:10.7554/eLife.86336)
Supplement: Figure 4—source data 1. [file elife-86336-fig4-data1.xlsx]

## Sheet: Sheet1
GAL4 Control	Total Sleep		UAS Control	Total Sleep		GAL4 x UAS	Total Sleep
;;repo G4/+ (F)	717.667		;106681/+;6782/+(F)	595.333		;106681/+;6782/repo G4(F)	797.333
;;repo G4/+ (F)	699.333		;106681/+;6782/+(F)	726		;106681/+;6782/repo G4(F)	903.333
;;repo G4/+ (F)	697.333		;106681/+;6782/+(F)	714		;106681/+;6782/repo G4(F)	688
;;repo G4/+ (F)	898		;106681/+;6782/+(F)	839.667		;106681/+;6782/repo G4(F)	801
;;repo G4/+ (F)	709		;106681/+;6782/+(F)	563.333		;106681/+;6782/repo G4(F)	1044.67
;;repo G4/+ (F)	777.667		;106681/+;6782/+(F)	798.667		;106681/+;6782/repo G4(F)	704.333
;;repo G4/+ (F)	606.667		;106681/+;6782/+(F)	607.667		;106681/+;6782/repo G4(F)	881.333
;;repo G4/+ (F)	741.667		;106681/+;6782/+(F)	414		;106681/+;6782/repo G4(F)	763.667
;;repo G4/+ (F)	656.333		;106681/+;6782/+(F)	661.333		;106681/+;6782/repo G4(F)	721
;;repo G4/+ (F)	812		;106681/+;6782/+(F)	727.667		;106681/+;6782/repo G4(F)	664
;;repo G4/+ (F)	738.333		;106681/+;6782/+(F)	820		;106681/+;6782/repo G4(F)	948
;;repo G4/+ (F)	737		;106681/+;6782/+(F)	953		;106681/+;6782/repo G4(F)	899.333
;;repo G4/+ (F)	645		;106681/+;6782/+(F)	523		;106681/+;6782/repo G4(F)	971
;;repo G4/+ (F)	684.333		;106681/+;6782/+(F)	814.333		;106681/+;6782/repo G4(F)	841
;;repo G4/+ (F)	890.333		;106681/+;6782/+(F)	552.667		;106681/+;6782/repo G4(F)	869.333
;;repo G4/+ (F)	614.667		;106681/+;6782/+(F)	744		;106681/+;6782/repo G4(F)	726
;;repo G4/+ (F)	832		;106681/+;6782/+(F)	977.75		;106681/+;6782/repo G4(F)	925
;;repo G4/+ (F)	670.75		;106681/+;6782/+(F)	903.5		;106681/+;6782/repo G4(F)	954.5
;;repo G4/+ (F)	1039.5		;106681/+;6782/+(F)	831.75		;106681/+;6782/repo G4(F)	929.25
;;repo G4/+ (F)	956.75		;106681/+;6782/+(F)	762.25		;106681/+;6782/repo G4(F)	899.75
;;repo G4/+ (F)	900.25		;106681/+;6782/+(F)	673.5		;106681/+;6782/repo G4(F)	1029.5
;;repo G4/+ (F)	887		;106681/+;6782/+(F)	942.5		;106681/+;6782/repo G4(F)	879.75
;;repo G4/+ (F)	872.75		;106681/+;6782/+(F)	861.25		;106681/+;6782/repo G4(F)	1044.25
;;repo G4/+ (F)	889.5		;106681/+;6782/+(F)	887.5		;106681/+;6782/repo G4(F)	1041.5
;;repo G4/+ (F)	1006.5		;106681/+;6782/+(F)	799.75		;106681/+;6782/repo G4(F)	1115.75
;;repo G4/+ (F)	826		;106681/+;6782/+(F)	995.25		;106681/+;6782/repo G4(F)	1002.25
;;repo G4/+ (F)	802		;106681/+;6782/+(F)	783.5		;106681/+;6782/repo G4(F)	1045
;;repo G4/+ (F)	649.25		;106681/+;6782/+(F)	795		;106681/+;6782/repo G4(F)	989
;;repo G4/+ (F)	1013.25		;106681/+;6782/+(F)	810.25		;106681/+;6782/repo G4(F)	1001.5
;;repo G4/+ (F)	901.25		;106681/+;6782/+(F)	860.75		;106681/+;6782/repo G4(F)	994.25
;;repo G4/+ (F)	813		;106681/+;6782/+(F)	900.75		;106681/+;6782/repo G4(F)	975
;;repo G4/+ (F)	915.5		;106681/+;6782/+(F)	873.5		;106681/+;6782/repo G4(F)	1033
;;repo G4/+ (F)	523.5		;106681/+;6782/+(F)	832.75		;106681/+;6782/repo G4(F)	958.5
;;repo G4/+ (F)	717.75		;106681/+;6782/+(F)	1033.75		;106681/+;6782/repo G4(F)	1106.75
;;repo G4/+ (F)	498.75		;106681/+;6782/+(F)	1012		;106681/+;6782/repo G4(F)	1136.5
;;repo G4/+ (F)	919.75		;106681/+;6782/+(F)	916.5		;106681/+;6782/repo G4(F)	1033.5
;;repo G4/+ (F)	677		;106681/+;6782/+(F)	962		;106681/+;6782/repo G4(F)	925
;;repo G4/+ (F)	949.75		;106681/+;6782/+(F)	977.25		;106681/+;6782/repo G4(F)	1044.75
;;repo G4/+ (F)	1005.5		;106681/+;6782/+(F)	796.75		;106681/+;6782/repo G4(F)	1070.25
;;repo G4/+ (F)	850.5		;106681/+;6782/+(F)	830.75		;106681/+;6782/repo G4(F)	1005.5
;;repo G4/+ (F)	860.5		;106681/+;6782/+(F)	898.25		;106681/+;6782/repo G4(F)	1105.33
;;repo G4/+ (F)	675.25		;106681/+;6782/+(F)	684.5		;106681/+;6782/repo G4(F)	944.75
;;repo G4/+ (F)	691		;106681/+;6782/+(F)	864.75		;106681/+;6782/repo G4(F)	966.5
;;repo G4/+ (F)	847		;106681/+;6782/+(F)	880.75		;106681/+;6782/repo G4(F)	1090.75
;;repo G4/+ (F)	863.25		;106681/+;6782/+(F)	901.25		;106681/+;6782/repo G4(F)	1019.75
;;repo G4/+ (F)	625.75		;106681/+;6782/+(F)	833.75		;106681/+;6782/repo G4(F)	1029
;;repo G4/+ (F)	986.25		;106681/+;6782/+(F)	956.5		;106681/+;6782/repo G4(F)	945.5
;;repo G4/+ (F)	937.75		;106681/+;6782/+(F)	993.75		;106681/+;6782/repo G4(F)	959.25
;NP6293 G4/+; (F)	916.75		106681/+;6782/+ (F)	904		106681/NP6293 G4;6782/+ (F)	1060.75
;NP6293 G4/+; (F)	962.5		106681/+;6782/+ (F)	815.5		106681/NP6293 G4;6782/+ (F)	981
;NP6293 G4/+; (F)	828.75		106681/+;6782/+ (F)	942.75		106681/NP6293 G4;6782/+ (F)	934.75
;NP6293 G4/+; (F)	1017		106681/+;6782/+ (F)	1002		106681/NP6293 G4;6782/+ (F)	899.75
;NP6293 G4/+; (F)	900		106681/+;6782/+ (F)	1019.75		106681/NP6293 G4;6782/+ (F)	907.5
;NP6293 G4/+; (F)	1018.25		106681/+;6782/+ (F)	785		106681/NP6293 G4;6782/+ (F)	1059.5
;NP6293 G4/+; (F)	724		106681/+;6782/+ (F)	800.5		106681/NP6293 G4;6782/+ (F)	1052.25
;NP6293 G4/+; (F)	631		106681/+;6782/+ (F)	880.25		106681/NP6293 G4;6782/+ (F)	970
;NP6293 G4/+; (F)	969.75		106681/+;6782/+ (F)	1076.25		106681/NP6293 G4;6782/+ (F)	950.75
;NP6293 G4/+; (F)	719.25		106681/+;6782/+ (F)	647.5		106681/NP6293 G4;6782/+ (F)	931
;NP6293 G4/+; (F)	963		106681/+;6782/+ (F)	861.25		106681/NP6293 G4;6782/+ (F)	894
;NP6293 G4/+; (F)	686.75		106681/+;6782/+ (F)	977.25		106681/NP6293 G4;6782/+ (F)	1031
;NP6293 G4/+; (F)	819.25		106681/+;6782/+ (F)	920.5		106681/NP6293 G4;6782/+ (F)	971.5
;NP6293 G4/+; (F)	951.5		106681/+;6782/+ (F)	963.5		106681/NP6293 G4;6782/+ (F)	1083.67
;NP6293 G4/+; (F)	762.75		106681/+;6782/+ (F)	662		106681/NP6293 G4;6782/+ (F)	1063.33
;NP6293 G4/+; (F)	620.75		106681/+;6782/+ (F)	869.5		106681/NP6293 G4;6782/+ (F)	817
;NP6293 G4/+; (F)	928.667		106681/+;6782/+ (F)	821.667		106681/NP6293 G4;6782/+ (F)	806.333
;NP6293 G4/+; (F)	887.333		106681/+;6782/+ (F)	622.667		106681/NP6293 G4;6782/+ (F)	934
;NP6293 G4/+; (F)	890.667		106681/+;6782/+ (F)	815.333		106681/NP6293 G4;6782/+ (F)	977.333
;NP6293 G4/+; (F)	912		106681/+;6782/+ (F)	869		106681/NP6293 G4;6782/+ (F)	863.667
;NP6293 G4/+; (F)	929.333		106681/+;6782/+ (F)	761.333		106681/NP6293 G4;6782/+ (F)	773
;NP6293 G4/+; (F)	602		106681/+;6782/+ (F)	822		106681/NP6293 G4;6782/+ (F)	778.667
;NP6293 G4/+; (F)	559.667		106681/+;6782/+ (F)	836.333		106681/NP6293 G4;6782/+ (F)	885.333
;NP6293 G4/+; (F)	736		106681/+;6782/+ (F)	885.667		106681/NP6293 G4;6782/+ (F)	922.667
;NP6293 G4/+; (F)	807.333		106681/+;6782/+ (F)	958		106681/NP6293 G4;6782/+ (F)	884
;NP6293 G4/+; (F)	938.333		106681/+;6782/+ (F)	799.333		106681/NP6293 G4;6782/+ (F)	987
;NP6293 G4/+; (F)	933.333		106681/+;6782/+ (F)	970		106681/NP6293 G4;6782/+ (F)	965
;NP6293 G4/+; (F)	800.667		106681/+;6782/+ (F)	934		106681/NP6293 G4;6782/+ (F)	799
;NP6293 G4/+; (F)	989.667		106681/+;6782/+ (F)	784		106681/NP6293 G4;6782/+ (F)	747.333
;NP6293 G4/+; (F)	832.333		106681/+;6782/+ (F)	837.667		106681/NP6293 G4;6782/+ (F)	820.667
;NP6293 G4/+; (F)	963		106681/+;6782/+ (F)	709.333		106681/NP6293 G4;6782/+ (F)	809.333
;NP6293 G4/+; (F)	922.333		106681/+;6782/+ (F)	777.333		106681/NP6293 G4;6782/+ (F)	835
;NP6293 G4/+; (F)	1035		106681/+;6782/+ (F)	524		106681/NP6293 G4;6782/+ (F)	888
;NP6293 G4/+; (F)	964.333		106681/+;6782/+ (F)	755.667		106681/NP6293 G4;6782/+ (F)	878
;NP6293 G4/+; (F)	884.667		106681/+;6782/+ (F)	1121		106681/NP6293 G4;6782/+ (F)	903
;NP6293 G4/+; (F)	969.333		106681/+;6782/+ (F)	1006.67		106681/NP6293 G4;6782/+ (F)	1015.67
;NP6293 G4/+; (F)	579.667		106681/+;6782/+ (F)	976		106681/NP6293 G4;6782/+ (F)	795.667
;NP6293 G4/+; (F)	716.667		106681/+;6782/+ (F)	837		106681/NP6293 G4;6782/+ (F)	1028.67
;NP6293 G4/+; (F)	868		106681/+;6782/+ (F)	724.333		106681/NP6293 G4;6782/+ (F)	1096.67
;NP6293 G4/+; (F)	710		106681/+;6782/+ (F)	1033		106681/NP6293 G4;6782/+ (F)	950.667
;NP6293 G4/+; (F)	826.333		106681/+;6782/+ (F)	1011.33		106681/NP6293 G4;6782/+ (F)	997
;NP6293 G4/+; (F)	894		106681/+;6782/+ (F)	767.667		106681/NP6293 G4;6782/+ (F)	861.333
;NP6293 G4/+; (F)	670.333		106681/+;6782/+ (F)	812		106681/NP6293 G4;6782/+ (F)	801.667
;NP6293 G4/+; (F)	821.333		106681/+;6782/+ (F)	845.667		106681/NP6293 G4;6782/+ (F)	847
;NP6293 G4/+; (F)	752.667		106681/+;6782/+ (F)	893.667
;NP6293 G4/+; (F)	975.667		106681/+;6782/+ (F)	904.667
;NP6293 G4/+; (F)	995.333		106681/+;6782/+ (F)	904.333
;NP6293 G4/+; (F)	714		106681/+;6782/+ (F)	956
;moody G4/+; (F)	760.75		106681/+;6782/+ (F)	904		106681/moody G4;6782/+ (F)	864.25
;moody G4/+; (F)	1094.25		106681/+;6782/+ (F)	815.5		106681/moody G4;6782/+ (F)	770.5
;moody G4/+; (F)	1044		106681/+;6782/+ (F)	942.75		106681/moody G4;6782/+ (F)	855.5
;moody G4/+; (F)	969.25		106681/+;6782/+ (F)	1002		106681/moody G4;6782/+ (F)	862
;moody G4/+; (F)	884.5		106681/+;6782/+ (F)	1019.75		106681/moody G4;6782/+ (F)	1033.5
;moody G4/+; (F)	922.75		106681/+;6782/+ (F)	785		106681/moody G4;6782/+ (F)	937
;moody G4/+; (F)	921		106681/+;6782/+ (F)	800.5		106681/moody G4;6782/+ (F)	1076
;moody G4/+; (F)	1054.5		106681/+;6782/+ (F)	880.25		106681/moody G4;6782/+ (F)	924.5
;moody G4/+; (F)	1120.75		106681/+;6782/+ (F)	1076.25		106681/moody G4;6782/+ (F)	811.25
;moody G4/+; (F)	1019.5		106681/+;6782/+ (F)	647.5		106681/moody G4;6782/+ (F)	808.75
;moody G4/+; (F)	693.5		106681/+;6782/+ (F)	861.25		106681/moody G4;6782/+ (F)	944.5
;moody G4/+; (F)	999.5		106681/+;6782/+ (F)	977.25		106681/moody G4;6782/+ (F)	981.75
;moody G4/+; (F)	997.25		106681/+;6782/+ (F)	920.5		106681/moody G4;6782/+ (F)	956
;moody G4/+; (F)	985.75		106681/+;6782/+ (F)	963.5		106681/moody G4;6782/+ (F)	814.75
;moody G4/+; (F)	1094.5		106681/+;6782/+ (F)	662		106681/moody G4;6782/+ (F)	826.75
;moody G4/+; (F)	925.5		106681/+;6782/+ (F)	869.5		106681/moody G4;6782/+ (F)	966.5
;moody G4/+; (F)	915.333		106681/+;6782/+ (F)	958.667		106681/moody G4;6782/+ (F)	899.667
;moody G4/+; (F)	1003.33		106681/+;6782/+ (F)	632.333		106681/moody G4;6782/+ (F)	878
;moody G4/+; (F)	707		106681/+;6782/+ (F)	969		106681/moody G4;6782/+ (F)	1062.33
;moody G4/+; (F)	699.333		106681/+;6782/+ (F)	842.333		106681/moody G4;6782/+ (F)	844.667
;moody G4/+; (F)	930.667		106681/+;6782/+ (F)	895.667		106681/moody G4;6782/+ (F)	1011.33
;moody G4/+; (F)	1022.67		106681/+;6782/+ (F)	980		106681/moody G4;6782/+ (F)	994.667
;moody G4/+; (F)	861		106681/+;6782/+ (F)	965.667		106681/moody G4;6782/+ (F)	1030.67
;moody G4/+; (F)	1001		106681/+;6782/+ (F)	991.667		106681/moody G4;6782/+ (F)	894
;moody G4/+; (F)	713		106681/+;6782/+ (F)	1001.67		106681/moody G4;6782/+ (F)	841.667
;moody G4/+; (F)	797.333		106681/+;6782/+ (F)	927.667		106681/moody G4;6782/+ (F)	917.667
;moody G4/+; (F)	946.667		106681/+;6782/+ (F)	991.667		106681/moody G4;6782/+ (F)	891
;moody G4/+; (F)	839.333		106681/+;6782/+ (F)	1031.33		106681/moody G4;6782/+ (F)	685.333
;moody G4/+; (F)	825.667		106681/+;6782/+ (F)	967.333		106681/moody G4;6782/+ (F)	919
;moody G4/+; (F)	713.333		106681/+;6782/+ (F)	993.333		106681/moody G4;6782/+ (F)	787.667
;moody G4/+; (F)	748.667		106681/+;6782/+ (F)	841.333		106681/moody G4;6782/+ (F)	897.667
;moody G4/+; (F)	856		106681/+;6782/+ (F)	844		106681/moody G4;6782/+ (F)	845.667
;moody G4/+; (F)	871.333		106681/+;6782/+ (F)	821.667		106681/moody G4;6782/+ (F)	761
;moody G4/+; (F)	912.333		106681/+;6782/+ (F)	622.667		106681/moody G4;6782/+ (F)	764
;moody G4/+; (F)	655.667		106681/+;6782/+ (F)	815.333		106681/moody G4;6782/+ (F)	965.333
;moody G4/+; (F)	818		106681/+;6782/+ (F)	869		106681/moody G4;6782/+ (F)	781.333
;moody G4/+; (F)	819.667		106681/+;6782/+ (F)	761.333		106681/moody G4;6782/+ (F)	928
;moody G4/+; (F)	1010		106681/+;6782/+ (F)	822		106681/moody G4;6782/+ (F)	944.667
;moody G4/+; (F)	1057		106681/+;6782/+ (F)	836.333		106681/moody G4;6782/+ (F)	1008.33
;moody G4/+; (F)	1026.33		106681/+;6782/+ (F)	885.667		106681/moody G4;6782/+ (F)	819
;moody G4/+; (F)	865.333		106681/+;6782/+ (F)	958		106681/moody G4;6782/+ (F)	759
;moody G4/+; (F)	734		106681/+;6782/+ (F)	799.333		106681/moody G4;6782/+ (F)	887
;moody G4/+; (F)	933		106681/+;6782/+ (F)	970		106681/moody G4;6782/+ (F)	858.333
;moody G4/+; (F)	799.333		106681/+;6782/+ (F)	934		106681/moody G4;6782/+ (F)	647.333
;moody G4/+; (F)	830.667		106681/+;6782/+ (F)	784		106681/moody G4;6782/+ (F)	831
;moody G4/+; (F)	828		106681/+;6782/+ (F)	837.667		106681/moody G4;6782/+ (F)	707
;moody G4/+; (F)	716		106681/+;6782/+ (F)	709.333		106681/moody G4;6782/+ (F)	816
;moody G4/+; (F)	741.667		106681/+;6782/+ (F)	777.333		106681/moody G4;6782/+ (F)	815
;;Rab9 G4/+ (F)	903.75		106681/+;6782/+ (F)	904		106681/+;6782/Rab9 G4 (F)	959.75
;;Rab9 G4/+ (F)	952.25		106681/+;6782/+ (F)	815.5		106681/+;6782/Rab9 G4 (F)	1142.5
;;Rab9 G4/+ (F)	1110.75		106681/+;6782/+ (F)	942.75		106681/+;6782/Rab9 G4 (F)	1178.5
;;Rab9 G4/+ (F)	975.5		106681/+;6782/+ (F)	1002		106681/+;6782/Rab9 G4 (F)	1058.25
;;Rab9 G4/+ (F)	964.25		106681/+;6782/+ (F)	1019.75		106681/+;6782/Rab9 G4 (F)	1124.75
;;Rab9 G4/+ (F)	990		106681/+;6782/+ (F)	785		106681/+;6782/Rab9 G4 (F)	1097.25
;;Rab9 G4/+ (F)	982.75		106681/+;6782/+ (F)	800.5		106681/+;6782/Rab9 G4 (F)	959.25
;;Rab9 G4/+ (F)	915.5		106681/+;6782/+ (F)	880.25		106681/+;6782/Rab9 G4 (F)	1114
;;Rab9 G4/+ (F)	976.5		106681/+;6782/+ (F)	1076.25		106681/+;6782/Rab9 G4 (F)	1116.5
;;Rab9 G4/+ (F)	904.25		106681/+;6782/+ (F)	647.5		106681/+;6782/Rab9 G4 (F)	1010
;;Rab9 G4/+ (F)	953.75		106681/+;6782/+ (F)	861.25		106681/+;6782/Rab9 G4 (F)	885.75
;;Rab9 G4/+ (F)	898		106681/+;6782/+ (F)	977.25		106681/+;6782/Rab9 G4 (F)	1143.5
;;Rab9 G4/+ (F)	1077.25		106681/+;6782/+ (F)	920.5		106681/+;6782/Rab9 G4 (F)	1222.5
;;Rab9 G4/+ (F)	916.5		106681/+;6782/+ (F)	963.5		106681/+;6782/Rab9 G4 (F)	1104.25
;;Rab9 G4/+ (F)	850		106681/+;6782/+ (F)	662		106681/+;6782/Rab9 G4 (F)	1107.75
;;Rab9 G4/+ (F)	833.5		106681/+;6782/+ (F)	869.5		106681/+;6782/Rab9 G4 (F)	1065
;;Rab9 G4/+ (F)	987.333		106681/+;6782/+ (F)	965		106681/+;6782/Rab9 G4 (F)	1037.67
;;Rab9 G4/+ (F)	1154		106681/+;6782/+ (F)	919.667		106681/+;6782/Rab9 G4 (F)	952.333
;;Rab9 G4/+ (F)	723		106681/+;6782/+ (F)	923.333		106681/+;6782/Rab9 G4 (F)	1293
;;Rab9 G4/+ (F)	1022.33		106681/+;6782/+ (F)	764		106681/+;6782/Rab9 G4 (F)	750
;;Rab9 G4/+ (F)	939.667		106681/+;6782/+ (F)	790.667		106681/+;6782/Rab9 G4 (F)	765.667
;;Rab9 G4/+ (F)	1104		106681/+;6782/+ (F)	661		106681/+;6782/Rab9 G4 (F)	1013
;;Rab9 G4/+ (F)	825.333		106681/+;6782/+ (F)	859		106681/+;6782/Rab9 G4 (F)	1002.33
;;Rab9 G4/+ (F)	1018		106681/+;6782/+ (F)	957.667		106681/+;6782/Rab9 G4 (F)	579
;;Rab9 G4/+ (F)	1035.67		106681/+;6782/+ (F)	734.667		106681/+;6782/Rab9 G4 (F)	1023.67
;;Rab9 G4/+ (F)	822		106681/+;6782/+ (F)	783.667		106681/+;6782/Rab9 G4 (F)	733
;;Rab9 G4/+ (F)	1136.33		106681/+;6782/+ (F)	757		106681/+;6782/Rab9 G4 (F)	940.333
;;Rab9 G4/+ (F)	1065.33		106681/+;6782/+ (F)	910.333		106681/+;6782/Rab9 G4 (F)	1005
;;Rab9 G4/+ (F)	1090.33		106681/+;6782/+ (F)	750.667		106681/+;6782/Rab9 G4 (F)	998.667
;;Rab9 G4/+ (F)	842.667		106681/+;6782/+ (F)	955.667		106681/+;6782/Rab9 G4 (F)	972
;;Rab9 G4/+ (F)	792.333		106681/+;6782/+ (F)	837.333		106681/+;6782/Rab9 G4 (F)	884
;;Rab9 G4/+ (F)	715		106681/+;6782/+ (F)	763.667		106681/+;6782/Rab9 G4 (F)	1159
;;Rab9 G4/+ (F)	971		106681/+;6782/+ (F)	951		106681/+;6782/Rab9 G4 (F)	1167
;;Rab9 G4/+ (F)	1041.67		106681/+;6782/+ (F)	897.333		106681/+;6782/Rab9 G4 (F)	1071.33
;;Rab9 G4/+ (F)	981.333		106681/+;6782/+ (F)	1136		106681/+;6782/Rab9 G4 (F)	879.667
;;Rab9 G4/+ (F)	944.667		106681/+;6782/+ (F)	933.333		106681/+;6782/Rab9 G4 (F)	992
;;Rab9 G4/+ (F)	907.333		106681/+;6782/+ (F)	940.333		106681/+;6782/Rab9 G4 (F)	1141
;;Rab9 G4/+ (F)	691.667		106681/+;6782/+ (F)	838.333		106681/+;6782/Rab9 G4 (F)	944.667
;;Rab9 G4/+ (F)	922.333		106681/+;6782/+ (F)	742		106681/+;6782/Rab9 G4 (F)	967
;;Rab9 G4/+ (F)	878.333		106681/+;6782/+ (F)	1060.67		106681/+;6782/Rab9 G4 (F)	1108.67
;;Rab9 G4/+ (F)	954.667		106681/+;6782/+ (F)	973.667		106681/+;6782/Rab9 G4 (F)	999.333
;;Rab9 G4/+ (F)	863		106681/+;6782/+ (F)	1030		106681/+;6782/Rab9 G4 (F)	1362.67
;;Rab9 G4/+ (F)	869		106681/+;6782/+ (F)	1000.33		106681/+;6782/Rab9 G4 (F)	1195.67
;;Rab9 G4/+ (F)	851		106681/+;6782/+ (F)	952.333		106681/+;6782/Rab9 G4 (F)	696.667
;;Rab9 G4/+ (F)	1038.33		106681/+;6782/+ (F)	773.667		106681/+;6782/Rab9 G4 (F)	1003.33
;;Rab9 G4/+ (F)	955		106681/+;6782/+ (F)	799		106681/+;6782/Rab9 G4 (F)	1079.67
;;Rab9 G4/+ (F)	834.333		106681/+;6782/+ (F)	818.667		106681/+;6782/Rab9 G4 (F)	1044.33
;;Rab9 G4/+ (F)	960.667		106681/+;6782/+ (F)	967.667

## Sheet: Sheet2
PG+SPG>Orct/Orct2 RNAi at18 degree
GAL4 Control	Total Sleep		UAS Control	Total Sleep		GAL4 x UAS	Total Sleep
;9-137 G4/+;tub80.ts/+ (F)	717.333		;106681/+; 6782/+ (F)	813.333		;106681/9-137 G4;6782/tub80.ts (F)	883.333
;9-137 G4/+;tub80.ts/+ (F)	897		;106681/+; 6782/+ (F)	899		;106681/9-137 G4;6782/tub80.ts (F)	663
;9-137 G4/+;tub80.ts/+ (F)	912.333		;106681/+; 6782/+ (F)	828.667		;106681/9-137 G4;6782/tub80.ts (F)	931.667
;9-137 G4/+;tub80.ts/+ (F)	867.667		;106681/+; 6782/+ (F)	969		;106681/9-137 G4;6782/tub80.ts (F)	960.667
;9-137 G4/+;tub80.ts/+ (F)	866		;106681/+; 6782/+ (F)	894.667		;106681/9-137 G4;6782/tub80.ts (F)	878.667
;9-137 G4/+;tub80.ts/+ (F)	784		;106681/+; 6782/+ (F)	992		;106681/9-137 G4;6782/tub80.ts (F)	938.667
;9-137 G4/+;tub80.ts/+ (F)	636		;106681/+; 6782/+ (F)	1038.33		;106681/9-137 G4;6782/tub80.ts (F)	967
;9-137 G4/+;tub80.ts/+ (F)	843		;106681/+; 6782/+ (F)	683.333		;106681/9-137 G4;6782/tub80.ts (F)	1003.33
;9-137 G4/+;tub80.ts/+ (F)	779		;106681/+; 6782/+ (F)	938.333		;106681/9-137 G4;6782/tub80.ts (F)	915.667
;9-137 G4/+;tub80.ts/+ (F)	751.667		;106681/+; 6782/+ (F)	825		;106681/9-137 G4;6782/tub80.ts (F)	910.333
;9-137 G4/+;tub80.ts/+ (F)	628.667		;106681/+; 6782/+ (F)	698.667		;106681/9-137 G4;6782/tub80.ts (F)	990.333
;9-137 G4/+;tub80.ts/+ (F)	536.333		;106681/+; 6782/+ (F)	901		;106681/9-137 G4;6782/tub80.ts (F)	977
;9-137 G4/+;tub80.ts/+ (F)	709.333		;106681/+; 6782/+ (F)	832		;106681/9-137 G4;6782/tub80.ts (F)	769.333
;9-137 G4/+;tub80.ts/+ (F)	668.667		;106681/+; 6782/+ (F)	843.333		;106681/9-137 G4;6782/tub80.ts (F)	931
;9-137 G4/+;tub80.ts/+ (F)	701.667		;106681/+; 6782/+ (F)	856.667		;106681/9-137 G4;6782/tub80.ts (F)	1031.67
;9-137 G4/+;tub80.ts/+ (F)	882.333		;106681/+; 6782/+ (F)	912.333		;106681/9-137 G4;6782/tub80.ts (F)	947
;9-137 G4/+;tub80.ts/+ (F)	778.333		;106681/+; 6782/+ (F)	978		;106681/9-137 G4;6782/tub80.ts (F)	915
;9-137 G4/+;tub80.ts/+ (F)	980.667		;106681/+; 6782/+ (F)	887.667		;106681/9-137 G4;6782/tub80.ts (F)	1037.33
;9-137 G4/+;tub80.ts/+ (F)	854		;106681/+; 6782/+ (F)	975.333		;106681/9-137 G4;6782/tub80.ts (F)	1064.33
;9-137 G4/+;tub80.ts/+ (F)	701		;106681/+; 6782/+ (F)	861.333		;106681/9-137 G4;6782/tub80.ts (F)	1116.67
;9-137 G4/+;tub80.ts/+ (F)	741.333		;106681/+; 6782/+ (F)	954.667		;106681/9-137 G4;6782/tub80.ts (F)	984.667
;9-137 G4/+;tub80.ts/+ (F)	812		;106681/+; 6782/+ (F)	1030.33		;106681/9-137 G4;6782/tub80.ts (F)	910.667
;9-137 G4/+;tub80.ts/+ (F)	795.667		;106681/+; 6782/+ (F)	874.667		;106681/9-137 G4;6782/tub80.ts (F)	1002.33
;9-137 G4/+;tub80.ts/+ (F)	631		;106681/+; 6782/+ (F)	1119.67		;106681/9-137 G4;6782/tub80.ts (F)	906.667
;9-137 G4/+;tub80.ts/+ (F)	620.333		;106681/+; 6782/+ (F)	1029.67		;106681/9-137 G4;6782/tub80.ts (F)	1088.33
;9-137 G4/+;tub80.ts/+ (F)	793		;106681/+; 6782/+ (F)	949.333		;106681/9-137 G4;6782/tub80.ts (F)	1050
;9-137 G4/+;tub80.ts/+ (F)	770		;106681/+; 6782/+ (F)	1019		;106681/9-137 G4;6782/tub80.ts (F)	825.667
;9-137 G4/+;tub80.ts/+ (F)	913.333		;106681/+; 6782/+ (F)	1041		;106681/9-137 G4;6782/tub80.ts (F)	1139
;9-137 G4/+;tub80.ts/+ (F)	904.667		;106681/+; 6782/+ (F)	1056.33		;106681/9-137 G4;6782/tub80.ts (F)	955
;9-137 G4/+;tub80.ts/+ (F)	717.333		;106681/+; 6782/+ (F)	1083.67		;106681/9-137 G4;6782/tub80.ts (F)	1039.67
;9-137 G4/+;tub80.ts/+ (F)	502		;106681/+; 6782/+ (F)	943.667		;106681/9-137 G4;6782/tub80.ts (F)	1093
;9-137 G4/+;tub80.ts/+ (F)	852		;106681/+; 6782/+ (F)	992.333		;106681/9-137 G4;6782/tub80.ts (F)	1086.33
;9-137 G4/+;tub80.ts/+ (F)	894.667		;106681/+; 6782/+ (F)	973		;106681/9-137 G4;6782/tub80.ts (F)	802.333
;9-137 G4/+;tub80.ts/+ (F)	685.333		;106681/+; 6782/+ (F)	867.667		;106681/9-137 G4;6782/tub80.ts (F)	737
;9-137 G4/+;tub80.ts/+ (F)	859.333		;106681/+; 6782/+ (F)	818.333		;106681/9-137 G4;6782/tub80.ts (F)	867.333
;9-137 G4/+;tub80.ts/+ (F)	615.667		;106681/+; 6782/+ (F)	815		;106681/9-137 G4;6782/tub80.ts (F)	695.667
;9-137 G4/+;tub80.ts/+ (F)	727.333		;106681/+; 6782/+ (F)	806		;106681/9-137 G4;6782/tub80.ts (F)	658.333
;9-137 G4/+;tub80.ts/+ (F)	687.667		;106681/+; 6782/+ (F)	757.667		;106681/9-137 G4;6782/tub80.ts (F)	921.333
;9-137 G4/+;tub80.ts/+ (F)	938		;106681/+; 6782/+ (F)	915.333		;106681/9-137 G4;6782/tub80.ts (F)	1048
;9-137 G4/+;tub80.ts/+ (F)	701		;106681/+; 6782/+ (F)	891		;106681/9-137 G4;6782/tub80.ts (F)	749
;9-137 G4/+;tub80.ts/+ (F)	668		;106681/+; 6782/+ (F)	701.333		;106681/9-137 G4;6782/tub80.ts (F)	887
;9-137 G4/+;tub80.ts/+ (F)	636.667		;106681/+; 6782/+ (F)	715		;106681/9-137 G4;6782/tub80.ts (F)	779.333
;9-137 G4/+;tub80.ts/+ (F)	655		;106681/+; 6782/+ (F)	747		;106681/9-137 G4;6782/tub80.ts (F)	915.667
;9-137 G4/+;tub80.ts/+ (F)	692.667		;106681/+; 6782/+ (F)	897.333		;106681/9-137 G4;6782/tub80.ts (F)	883
;9-137 G4/+;tub80.ts/+ (F)	635.333		;106681/+; 6782/+ (F)	691.667		;106681/9-137 G4;6782/tub80.ts (F)	905.333
;9-137 G4/+;tub80.ts/+ (F)	635.333		;106681/+; 6782/+ (F)	967.333		;106681/9-137 G4;6782/tub80.ts (F)	872.333
;9-137 G4/+;tub80.ts/+ (F)	712		;106681/+; 6782/+ (F)	827.667		;106681/9-137 G4;6782/tub80.ts (F)	908
;9-137 G4/+;tub80.ts/+ (F)	538.667		;106681/+; 6782/+ (F)	815		;106681/9-137 G4;6782/tub80.ts (F)	802.333
PG+SPG>Orct/Orct2 RNAi at31 degree
;9-137 G4/+;tub80.ts/+ (F)	919		;106681/+; 6782/+ (F)	802		;106681/9-137 G4;6782/tub80.ts (F)	1161
;9-137 G4/+;tub80.ts/+ (F)	828		;106681/+; 6782/+ (F)	986		;106681/9-137 G4;6782/tub80.ts (F)	849.5
;9-137 G4/+;tub80.ts/+ (F)	822		;106681/+; 6782/+ (F)	898.5		;106681/9-137 G4;6782/tub80.ts (F)	1129
;9-137 G4/+;tub80.ts/+ (F)	922.5		;106681/+; 6782/+ (F)	870.5		;106681/9-137 G4;6782/tub80.ts (F)	1207
;9-137 G4/+;tub80.ts/+ (F)	618.5		;106681/+; 6782/+ (F)	901.5		;106681/9-137 G4;6782/tub80.ts (F)	1241
;9-137 G4/+;tub80.ts/+ (F)	680.5		;106681/+; 6782/+ (F)	1149		;106681/9-137 G4;6782/tub80.ts (F)	1050
;9-137 G4/+;tub80.ts/+ (F)	660.5		;106681/+; 6782/+ (F)	1056.5		;106681/9-137 G4;6782/tub80.ts (F)	1079.5
;9-137 G4/+;tub80.ts/+ (F)	895		;106681/+; 6782/+ (F)	646		;106681/9-137 G4;6782/tub80.ts (F)	1141
;9-137 G4/+;tub80.ts/+ (F)	727		;106681/+; 6782/+ (F)	956		;106681/9-137 G4;6782/tub80.ts (F)	1091.5
;9-137 G4/+;tub80.ts/+ (F)	797		;106681/+; 6782/+ (F)	972		;106681/9-137 G4;6782/tub80.ts (F)	925.5
;9-137 G4/+;tub80.ts/+ (F)	658.5		;106681/+; 6782/+ (F)	725		;106681/9-137 G4;6782/tub80.ts (F)	1033
;9-137 G4/+;tub80.ts/+ (F)	562.5		;106681/+; 6782/+ (F)	1082		;106681/9-137 G4;6782/tub80.ts (F)	1194
;9-137 G4/+;tub80.ts/+ (F)	822		;106681/+; 6782/+ (F)	839		;106681/9-137 G4;6782/tub80.ts (F)	942.5
;9-137 G4/+;tub80.ts/+ (F)	738		;106681/+; 6782/+ (F)	974		;106681/9-137 G4;6782/tub80.ts (F)	1200.5
;9-137 G4/+;tub80.ts/+ (F)	938.5		;106681/+; 6782/+ (F)	871.5		;106681/9-137 G4;6782/tub80.ts (F)	1105
;9-137 G4/+;tub80.ts/+ (F)	905.5		;106681/+; 6782/+ (F)	1037.5		;106681/9-137 G4;6782/tub80.ts (F)	1182
;9-137 G4/+;tub80.ts/+ (F)	874		;106681/+; 6782/+ (F)	861		;106681/9-137 G4;6782/tub80.ts (F)	978
;9-137 G4/+;tub80.ts/+ (F)	612		;106681/+; 6782/+ (F)	908		;106681/9-137 G4;6782/tub80.ts (F)	900
;9-137 G4/+;tub80.ts/+ (F)	700.5		;106681/+; 6782/+ (F)	661		;106681/9-137 G4;6782/tub80.ts (F)	1011.5
;9-137 G4/+;tub80.ts/+ (F)	691		;106681/+; 6782/+ (F)	778.5		;106681/9-137 G4;6782/tub80.ts (F)	1002
;9-137 G4/+;tub80.ts/+ (F)	793		;106681/+; 6782/+ (F)	715.5		;106681/9-137 G4;6782/tub80.ts (F)	800
;9-137 G4/+;tub80.ts/+ (F)	812		;106681/+; 6782/+ (F)	787		;106681/9-137 G4;6782/tub80.ts (F)	1130
;9-137 G4/+;tub80.ts/+ (F)	677		;106681/+; 6782/+ (F)	827		;106681/9-137 G4;6782/tub80.ts (F)	1310
;9-137 G4/+;tub80.ts/+ (F)	934.5		;106681/+; 6782/+ (F)	745		;106681/9-137 G4;6782/tub80.ts (F)	1039
;9-137 G4/+;tub80.ts/+ (F)	763		;106681/+; 6782/+ (F)	1001		;106681/9-137 G4;6782/tub80.ts (F)	914
;9-137 G4/+;tub80.ts/+ (F)	689.5		;106681/+; 6782/+ (F)	667.5		;106681/9-137 G4;6782/tub80.ts (F)	992.5
;9-137 G4/+;tub80.ts/+ (F)	1116		;106681/+; 6782/+ (F)	735		;106681/9-137 G4;6782/tub80.ts (F)	1117.5
;9-137 G4/+;tub80.ts/+ (F)	689.5		;106681/+; 6782/+ (F)	957		;106681/9-137 G4;6782/tub80.ts (F)	1117.5
;9-137 G4/+;tub80.ts/+ (F)	750		;106681/+; 6782/+ (F)	684.5		;106681/9-137 G4;6782/tub80.ts (F)	1052.5
;9-137 G4/+;tub80.ts/+ (F)	821.5		;106681/+; 6782/+ (F)	757		;106681/9-137 G4;6782/tub80.ts (F)	1068
;9-137 G4/+;tub80.ts/+ (F)	697.5		;106681/+; 6782/+ (F)	727.5		;106681/9-137 G4;6782/tub80.ts (F)	1020
;9-137 G4/+;tub80.ts/+ (F)	525		;106681/+; 6782/+ (F)	1093.5		;106681/9-137 G4;6782/tub80.ts (F)	1033.5
;9-137 G4/+;tub80.ts/+ (F)	847		;106681/+; 6782/+ (F)	1017.5		;106681/9-137 G4;6782/tub80.ts (F)	1078.5
;9-137 G4/+;tub80.ts/+ (F)	1010		;106681/+; 6782/+ (F)	1014		;106681/9-137 G4;6782/tub80.ts (F)	1176
;9-137 G4/+;tub80.ts/+ (F)	941		;106681/+; 6782/+ (F)	884		;106681/9-137 G4;6782/tub80.ts (F)	1122.5
;9-137 G4/+;tub80.ts/+ (F)	799		;106681/+; 6782/+ (F)	1139		;106681/9-137 G4;6782/tub80.ts (F)	1107.5
;9-137 G4/+;tub80.ts/+ (F)	768.5		;106681/+; 6782/+ (F)	1010		;106681/9-137 G4;6782/tub80.ts (F)	1016
;9-137 G4/+;tub80.ts/+ (F)	807		;106681/+; 6782/+ (F)	966.5		;106681/9-137 G4;6782/tub80.ts (F)	1146
;9-137 G4/+;tub80.ts/+ (F)	827.5		;106681/+; 6782/+ (F)	1101.5		;106681/9-137 G4;6782/tub80.ts (F)	1116.5
;9-137 G4/+;tub80.ts/+ (F)	337		;106681/+; 6782/+ (F)	1178		;106681/9-137 G4;6782/tub80.ts (F)	1130
;9-137 G4/+;tub80.ts/+ (F)	622		;106681/+; 6782/+ (F)	993.5		;106681/9-137 G4;6782/tub80.ts (F)	1123
;9-137 G4/+;tub80.ts/+ (F)	928.5		;106681/+; 6782/+ (F)	811		;106681/9-137 G4;6782/tub80.ts (F)	1274
;9-137 G4/+;tub80.ts/+ (F)	882		;106681/+; 6782/+ (F)	1110.5		;106681/9-137 G4;6782/tub80.ts (F)	1028
;9-137 G4/+;tub80.ts/+ (F)	955.5		;106681/+; 6782/+ (F)	1139		;106681/9-137 G4;6782/tub80.ts (F)	1208.5
;9-137 G4/+;tub80.ts/+ (F)	1025		;106681/+; 6782/+ (F)	1200		;106681/9-137 G4;6782/tub80.ts (F)	903
;9-137 G4/+;tub80.ts/+ (F)	744		;106681/+; 6782/+ (F)	1020		;106681/9-137 G4;6782/tub80.ts (F)	1259
;9-137 G4/+;tub80.ts/+ (F)	717		;106681/+; 6782/+ (F)	1118.5		;106681/9-137 G4;6782/tub80.ts (F)	1153
;9-137 G4/+;tub80.ts/+ (F)	1086.5					;106681/9-137 G4;6782/tub80.ts (F)	1018.5
PG+SPG>Orct/Orct2 RNAi at18 degree
;9-137 G4/+;tub80.ts/+ (F)	717.333		;106681/+; 47133/+ (F)	887.333		;106681/9-137 G4; 47133/tub80.ts (F)	843
;9-137 G4/+;tub80.ts/+ (F)	897		;106681/+; 47133/+ (F)	888		;106681/9-137 G4; 47133/tub80.ts (F)	811.333
;9-137 G4/+;tub80.ts/+ (F)	912.333		;106681/+; 47133/+ (F)	805.667		;106681/9-137 G4; 47133/tub80.ts (F)	662.667
;9-137 G4/+;tub80.ts/+ (F)	867.667		;106681/+; 47133/+ (F)	819.333		;106681/9-137 G4; 47133/tub80.ts (F)	517
;9-137 G4/+;tub80.ts/+ (F)	866		;106681/+; 47133/+ (F)	1015		;106681/9-137 G4; 47133/tub80.ts (F)	740.667
;9-137 G4/+;tub80.ts/+ (F)	784		;106681/+; 47133/+ (F)	914		;106681/9-137 G4; 47133/tub80.ts (F)	1052.67
;9-137 G4/+;tub80.ts/+ (F)	636		;106681/+; 47133/+ (F)	790.333		;106681/9-137 G4; 47133/tub80.ts (F)	870
;9-137 G4/+;tub80.ts/+ (F)	843		;106681/+; 47133/+ (F)	831		;106681/9-137 G4; 47133/tub80.ts (F)	836.333
;9-137 G4/+;tub80.ts/+ (F)	779		;106681/+; 47133/+ (F)	775.333		;106681/9-137 G4; 47133/tub80.ts (F)	1030.67
;9-137 G4/+;tub80.ts/+ (F)	751.667		;106681/+; 47133/+ (F)	828.333		;106681/9-137 G4; 47133/tub80.ts (F)	978.333
;9-137 G4/+;tub80.ts/+ (F)	628.667		;106681/+; 47133/+ (F)	903.333		;106681/9-137 G4; 47133/tub80.ts (F)	515.333
;9-137 G4/+;tub80.ts/+ (F)	536.333		;106681/+; 47133/+ (F)	975.333		;106681/9-137 G4; 47133/tub80.ts (F)	811.667
;9-137 G4/+;tub80.ts/+ (F)	709.333		;106681/+; 47133/+ (F)	730.333		;106681/9-137 G4; 47133/tub80.ts (F)	713
;9-137 G4/+;tub80.ts/+ (F)	668.667		;106681/+; 47133/+ (F)	699		;106681/9-137 G4; 47133/tub80.ts (F)	750.667
;9-137 G4/+;tub80.ts/+ (F)	701.667		;106681/+; 47133/+ (F)	752.333		;106681/9-137 G4; 47133/tub80.ts (F)	634.333
;9-137 G4/+;tub80.ts/+ (F)	882.333		;106681/+; 47133/+ (F)	937.667		;106681/9-137 G4; 47133/tub80.ts (F)	666
;9-137 G4/+;tub80.ts/+ (F)	747		;106681/+; 47133/+ (F)	1017		;106681/9-137 G4; 47133/tub80.ts (F)	659.333
;9-137 G4/+;tub80.ts/+ (F)	489.667		;106681/+; 47133/+ (F)	820.333		;106681/9-137 G4; 47133/tub80.ts (F)	737.333
;9-137 G4/+;tub80.ts/+ (F)	769		;106681/+; 47133/+ (F)	748.333		;106681/9-137 G4; 47133/tub80.ts (F)	880.667
;9-137 G4/+;tub80.ts/+ (F)	664		;106681/+; 47133/+ (F)	957.667		;106681/9-137 G4; 47133/tub80.ts (F)	799.667
;9-137 G4/+;tub80.ts/+ (F)	882.333		;106681/+; 47133/+ (F)	792.667		;106681/9-137 G4; 47133/tub80.ts (F)	596.667
;9-137 G4/+;tub80.ts/+ (F)	715.667		;106681/+; 47133/+ (F)	926		;106681/9-137 G4; 47133/tub80.ts (F)	1034
;9-137 G4/+;tub80.ts/+ (F)	724.333		;106681/+; 47133/+ (F)	896		;106681/9-137 G4; 47133/tub80.ts (F)	872.667
;9-137 G4/+;tub80.ts/+ (F)	760		;106681/+; 47133/+ (F)	985.333		;106681/9-137 G4; 47133/tub80.ts (F)	1015
;9-137 G4/+;tub80.ts/+ (F)	785.333		;106681/+; 47133/+ (F)	829		;106681/9-137 G4; 47133/tub80.ts (F)	888
;9-137 G4/+;tub80.ts/+ (F)	753.667		;106681/+; 47133/+ (F)	786.667		;106681/9-137 G4; 47133/tub80.ts (F)	948.667
;9-137 G4/+;tub80.ts/+ (F)	459		;106681/+; 47133/+ (F)	771.333		;106681/9-137 G4; 47133/tub80.ts (F)	888.667
;9-137 G4/+;tub80.ts/+ (F)	771.333		;106681/+; 47133/+ (F)	759		;106681/9-137 G4; 47133/tub80.ts (F)	854
;9-137 G4/+;tub80.ts/+ (F)	831.667		;106681/+; 47133/+ (F)	878.333		;106681/9-137 G4; 47133/tub80.ts (F)	951.333
;9-137 G4/+;tub80.ts/+ (F)	810		;106681/+; 47133/+ (F)	662.667		;106681/9-137 G4; 47133/tub80.ts (F)	754.667
;9-137 G4/+;tub80.ts/+ (F)	761.333		;106681/+; 47133/+ (F)	848.667		;106681/9-137 G4; 47133/tub80.ts (F)	795
;9-137 G4/+;tub80.ts/+ (F)	903.333		;106681/+; 47133/+ (F)	906		;106681/9-137 G4; 47133/tub80.ts (F)	964.667
PG+SPG>Orct/Orct2 RNAi at31 degree
;9-137 G4/+;tub80.ts/+ (F)	919		;106681/+; 47133/+ (F)	1103.5		;106681/9-137 G4; 47133/tub80.ts (F)	1035.5
;9-137 G4/+;tub80.ts/+ (F)	828		;106681/+; 47133/+ (F)	912.5		;106681/9-137 G4; 47133/tub80.ts (F)	779.5
;9-137 G4/+;tub80.ts/+ (F)	822		;106681/+; 47133/+ (F)	1064		;106681/9-137 G4; 47133/tub80.ts (F)	879.5
;9-137 G4/+;tub80.ts/+ (F)	922.5		;106681/+; 47133/+ (F)	878		;106681/9-137 G4; 47133/tub80.ts (F)	842
;9-137 G4/+;tub80.ts/+ (F)	618.5		;106681/+; 47133/+ (F)	1049		;106681/9-137 G4; 47133/tub80.ts (F)	946.5
;9-137 G4/+;tub80.ts/+ (F)	680.5		;106681/+; 47133/+ (F)	1030.5		;106681/9-137 G4; 47133/tub80.ts (F)	1164
;9-137 G4/+;tub80.ts/+ (F)	660.5		;106681/+; 47133/+ (F)	624		;106681/9-137 G4; 47133/tub80.ts (F)	996.5
;9-137 G4/+;tub80.ts/+ (F)	895		;106681/+; 47133/+ (F)	829.5		;106681/9-137 G4; 47133/tub80.ts (F)	1199.5
;9-137 G4/+;tub80.ts/+ (F)	727		;106681/+; 47133/+ (F)	762		;106681/9-137 G4; 47133/tub80.ts (F)	1082.5
;9-137 G4/+;tub80.ts/+ (F)	797		;106681/+; 47133/+ (F)	782.5		;106681/9-137 G4; 47133/tub80.ts (F)	908
;9-137 G4/+;tub80.ts/+ (F)	658.5		;106681/+; 47133/+ (F)	854		;106681/9-137 G4; 47133/tub80.ts (F)	559
;9-137 G4/+;tub80.ts/+ (F)	562.5		;106681/+; 47133/+ (F)	797.5		;106681/9-137 G4; 47133/tub80.ts (F)	1043
;9-137 G4/+;tub80.ts/+ (F)	822		;106681/+; 47133/+ (F)	622		;106681/9-137 G4; 47133/tub80.ts (F)	830
;9-137 G4/+;tub80.ts/+ (F)	738		;106681/+; 47133/+ (F)	774		;106681/9-137 G4; 47133/tub80.ts (F)	907.5
;9-137 G4/+;tub80.ts/+ (F)	938.5		;106681/+; 47133/+ (F)	905		;106681/9-137 G4; 47133/tub80.ts (F)	1036.5
;9-137 G4/+;tub80.ts/+ (F)	905.5		;106681/+; 47133/+ (F)	1241		;106681/9-137 G4; 47133/tub80.ts (F)	1047.5
;9-137 G4/+;tub80.ts/+ (F)	901		;106681/+; 47133/+ (F)	871.5		;106681/9-137 G4; 47133/tub80.ts (F)	1210
;9-137 G4/+;tub80.ts/+ (F)	740		;106681/+; 47133/+ (F)	895		;106681/9-137 G4; 47133/tub80.ts (F)	1116
;9-137 G4/+;tub80.ts/+ (F)	748.5		;106681/+; 47133/+ (F)	751.5		;106681/9-137 G4; 47133/tub80.ts (F)	914.5
;9-137 G4/+;tub80.ts/+ (F)	804		;106681/+; 47133/+ (F)	934.5		;106681/9-137 G4; 47133/tub80.ts (F)	1059
;9-137 G4/+;tub80.ts/+ (F)	877		;106681/+; 47133/+ (F)	894.5		;106681/9-137 G4; 47133/tub80.ts (F)	1042
;9-137 G4/+;tub80.ts/+ (F)	691.5		;106681/+; 47133/+ (F)	738		;106681/9-137 G4; 47133/tub80.ts (F)	1276.5
;9-137 G4/+;tub80.ts/+ (F)	1026		;106681/+; 47133/+ (F)	720.5		;106681/9-137 G4; 47133/tub80.ts (F)	841
;9-137 G4/+;tub80.ts/+ (F)	769.5		;106681/+; 47133/+ (F)	869		;106681/9-137 G4; 47133/tub80.ts (F)	963.5
;9-137 G4/+;tub80.ts/+ (F)	550.5		;106681/+; 47133/+ (F)	715.5		;106681/9-137 G4; 47133/tub80.ts (F)	953
;9-137 G4/+;tub80.ts/+ (F)	895.5		;106681/+; 47133/+ (F)	624		;106681/9-137 G4; 47133/tub80.ts (F)	864.5
;9-137 G4/+;tub80.ts/+ (F)	724.5		;106681/+; 47133/+ (F)	654.5		;106681/9-137 G4; 47133/tub80.ts (F)	1029
;9-137 G4/+;tub80.ts/+ (F)	633		;106681/+; 47133/+ (F)	782.5		;106681/9-137 G4; 47133/tub80.ts (F)	1012.5
;9-137 G4/+;tub80.ts/+ (F)	902.5		;106681/+; 47133/+ (F)	853.5		;106681/9-137 G4; 47133/tub80.ts (F)	1103.5
;9-137 G4/+;tub80.ts/+ (F)	637.5		;106681/+; 47133/+ (F)	769		;106681/9-137 G4; 47133/tub80.ts (F)	966
;9-137 G4/+;tub80.ts/+ (F)	634		;106681/+; 47133/+ (F)	813.5		;106681/9-137 G4; 47133/tub80.ts (F)	829
;9-137 G4/+;tub80.ts/+ (F)	977.5		;106681/+; 47133/+ (F)	825		;106681/9-137 G4; 47133/tub80.ts (F)	966
