# Supplementary material for: Modulation of sleep by trafficking of lipids through the Drosophila blood-brain barrier
Source: eLife. 2023 May 4;12:e86336. doi: 10.7554/eLife.86336 (PMC10205086; doi:10.7554/eLife.86336)
Supplement: Figure 5—source data 1. [file elife-86336-fig5-data1.xlsx]

## Sheet: Sheet1
Genetic Background	C02	C03	C04 Butyryl	C04 Isobutyryl	C04-OH Isobutyryl	C14	C14:1	C16	C16:1	C18	C18:1	C18:2	C20	C20:1	C22
repoGal4/+	69.3341	14.4851	0.0643382	0.0721899	0.148625	0.678145	0.0707934	0.565663	1.70155	0.649792	3.30459	5.17101	0.0683426	0.0273514	0.0336599
repoGal4/+	71.5751	4.71675	0.0757535	0.128225	0.0810418	0.973652	0.328398	0.462363	1.30969	0.580443	4.91731	6.27543	0.0721558	0.0590359	0.0412082
repoGal4/+	72.5578	6.65572	0.0793731	0.105823	0.109274	1.27741	0.243951	0.649082	2.07835	0.551166	2.387	2.27011	0.242414	0.0241891	0.457947
Lrp2/+;Lrp1/repoGal4	65.2398	22.767	0.291971	0.166438	0.173116	0.893976	0.0774528	0.989846	1.27975	1.05053	2.72619	3.31553	0.74051	0.0541579	0.698155
Lrp2/+;Lrp1/repoGal4	55.356	13.655	0.125049	0.156404	0.152363	1.1885	0.0981478	0.843909	1.5479	1.35217	7.94291	12.1689	0.418485	0.0401555	0.203156
Lrp2/+;Lrp1/repoGal4	44.713	29.2106	0.247748	0.151494	0.171506	0.771321	0.111966	0.957848	0.750275	0.858019	3.54747	6.20555	0.4595	0.0438722	0.143327
Lrp2/+;Lrp1/+	54.6013	3.95946	0.070744	0.109946	0.0969723	1.8779	0.340305	0.806563	2.72993	0.708945	6.55714	5.94292	0.13277	0.0676105	0.11762
Lrp2/+;Lrp1/+	26.719	4.6851	0.0620517	0.115363	0.0632395	0.849987	0.166797	0.333777	1.3859	0.459115	3.02909	2.61677	0.0795476	0.0278315	0.037853
Lrp2/+;Lrp1/+	35.7507	1.37552	0.0351365	0.0761688	0.0540297	1.19965	0.184157	0.601707	2.18922	0.609586	5.7625	8.98747	0.143512	0.0523062	0.113157
