# Supplementary material for: Modulation of sleep by trafficking of lipids through the Drosophila blood-brain barrier
Source: eLife. 2023 May 4;12:e86336. doi: 10.7554/eLife.86336 (PMC10205086; doi:10.7554/eLife.86336)
Supplement: Figure 6—source data 1. [file elife-86336-fig6-data1.xlsx]

## Sheet: Sheet1
Genetic Background	C02	C03	C04 Butyryl	C04 Isobutyryl	C04-OH Isobutyryl	C14	C14:1	C16	C16:1	C18	C18:1	C18:2	C20	C22
repoGal4/+	69.3341	14.4851	0.0643382	0.0721899	0.148625	0.678145	0.0707934	0.565663	1.70155	0.649792	3.30459	5.17101	0.0683426	0.03366
repoGal4/+	71.5751	4.71675	0.0757535	0.138225	0.0810418	0.973652	0.328398	0.462363	1.30969	0.580443	4.91731	6.27543	0.0721558	0.041208
repoGal4/+	72.5578	6.65572	0.0793731	0.105823	0.109274	1.27741	0.243951	0.649082	2.07835	0.551166	2.387	2.27011	0.242414	0.457947
Orct2/+;Orct1/repoGal4	55.2378	8.07662	0.0730082	0.113766	0.0854681	0.852238	0.156313	0.892528	2.73438	0.552891	1.39341	0.902528	0.332049	0.094017
Orct2/+;Orct1/repoGal4	49.6894	2.27604	0.0334974	0.0612309	0.0655744	1.73368	0.227762	1.49345	3.46169	0.52307	1.38616	1.08994	0.276879	0.121977
Orct2/+;Orct1/repoGal4	48.266	6.13113	0.0513468	0.0900795	0.0752601	1.24307	0.343664	0.859277	2.29194	0.752604	4.28472	6.5665	0.318415	0.273159
Orct2/+;Orct1/+	32.1842	11.0223	0.0599922	0.0916926	0.0554448	1.20013	0.295416	0.691396	1.76764	0.582509	3.37108	1.50574	0.0885199	0.698155
Orct2/+;Orct1/+	50.0104	5.72386	0.0757747	0.142974	0.0458216	0.77644	0.212744	0.429246	1.40576	0.587331	3.27517	3.36974	0.135475	0.203156
Orct2/+;Orct1/+	52.2306	3.8875	0.0516188	0.0577939	0.0892849	1.32404	0.452677	0.400094	1.8879	0.495431	2.14464	3.60751	0.171509	0.143327
