# Supplementary material for: Modulation of sleep by trafficking of lipids through the Drosophila blood-brain barrier
Source: eLife. 2023 May 4;12:e86336. doi: 10.7554/eLife.86336 (PMC10205086; doi:10.7554/eLife.86336)
Supplement: Figure 7—figure supplement 1—source data 1. [file elife-86336-fig7-figsupp1-data1.xlsx]

## Sheet: Sheet1
Treatment	Total Sleep		Treatment	Total Sleep
Ctrl(F)	586.667		2.5 mg/L Acylcarnintine Mix1(F)	869.667
Ctrl(F)	719		2.5 mg/L Acylcarnintine Mix1(F)	836.667
Ctrl(F)	768.667		2.5 mg/L Acylcarnintine Mix1(F)	605.333
Ctrl(F)	537		2.5 mg/L Acylcarnintine Mix1(F)	591.333
Ctrl(F)	984.333		2.5 mg/L Acylcarnintine Mix1(F)	962
Ctrl(F)	772		2.5 mg/L Acylcarnintine Mix1(F)	673
Ctrl(F)	942		2.5 mg/L Acylcarnintine Mix1(F)	612.667
Ctrl(F)	527		2.5 mg/L Acylcarnintine Mix1(F)	816
Ctrl(F)	644		2.5 mg/L Acylcarnintine Mix1(F)	606.333
Ctrl(F)	689.333		2.5 mg/L Acylcarnintine Mix1(F)	816
Ctrl(F)	787.667		2.5 mg/L Acylcarnintine Mix1(F)	788.667
Ctrl(F)	581.333		2.5 mg/L Acylcarnintine Mix1(F)	1160.67
Ctrl(F)	980		2.5 mg/L Acylcarnintine Mix1(F)	691.667
Ctrl(F)	861.667		2.5 mg/L Acylcarnintine Mix1(F)	597
Ctrl(F)	514
Ctrl(F)	665.667
Ctrl(F)	795		5 mg/L Acylcarnintine Mix1(F)	775.667
Ctrl(F)	694		5 mg/L Acylcarnintine Mix1(F)	705.333
Ctrl(F)	801.333		5 mg/L Acylcarnintine Mix1(F)	788.333
Ctrl(F)	766.333		5 mg/L Acylcarnintine Mix1(F)	735.667
Ctrl(F)	654.333		5 mg/L Acylcarnintine Mix1(F)	711.667
Ctrl(F)	699		5 mg/L Acylcarnintine Mix1(F)	876.333
Ctrl(F)	775		5 mg/L Acylcarnintine Mix1(F)	786.333
Ctrl(F)	820.333		5 mg/L Acylcarnintine Mix1(F)	850
Ctrl(F)	539.667		5 mg/L Acylcarnintine Mix1(F)	695
Ctrl(F)	943		5 mg/L Acylcarnintine Mix1(F)	1338
Ctrl(F)	801		5 mg/L Acylcarnintine Mix1(F)	839
Ctrl(F)	783.667		5 mg/L Acylcarnintine Mix1(F)	600.333
Ctrl(F)	801.667		5 mg/L Acylcarnintine Mix1(F)	621
Ctrl(F)	912		5 mg/L Acylcarnintine Mix1(F)	659.667
Ctrl(F)	692.333		5 mg/L Acylcarnintine Mix1(F)	660.333
Ctrl(F)	728		5 mg/L Acylcarnintine Mix1(F)	674
Ctrl(F)	655.667		10 mg/L Acylcarnintine Mix1(F)	625.667
Ctrl(F)	863.333		10 mg/L Acylcarnintine Mix1(F)	642
Ctrl(F)	695.333		10 mg/L Acylcarnintine Mix1(F)	639
Ctrl(F)	738.333		10 mg/L Acylcarnintine Mix1(F)	791.667
Ctrl(F)	676.333		10 mg/L Acylcarnintine Mix1(F)	815
Ctrl(F)	794.333		10 mg/L Acylcarnintine Mix1(F)	723.333
Ctrl(F)	694.667		10 mg/L Acylcarnintine Mix1(F)	733.667
Ctrl(F)	975		10 mg/L Acylcarnintine Mix1(F)	877.333
Ctrl(F)	805.667		10 mg/L Acylcarnintine Mix1(F)	601
Ctrl(F)	495.333		10 mg/L Acylcarnintine Mix1(F)	961
Ctrl(F)	840.333		10 mg/L Acylcarnintine Mix1(F)	724.333
Ctrl(F)	615.667		10 mg/L Acylcarnintine Mix1(F)	786.667
Ctrl(F)	795		10 mg/L Acylcarnintine Mix1(F)	637.667
Ctrl(F)	753		10 mg/L Acylcarnintine Mix1(F)	837.333
Ctrl(F)	787.333
Ctrl(F)	676.667
Ctrl(F)	1085		25 mg/L Acylcarnintine Mix1(F)	696.333
Ctrl(F)	911.333		25 mg/L Acylcarnintine Mix1(F)	630
Ctrl(F)	660		25 mg/L Acylcarnintine Mix1(F)	926.667
Ctrl(F)	993.333		25 mg/L Acylcarnintine Mix1(F)	769
Ctrl(F)	833		25 mg/L Acylcarnintine Mix1(F)	732.667
Ctrl(F)	778		25 mg/L Acylcarnintine Mix1(F)	796.667
Ctrl(F)	916.667		25 mg/L Acylcarnintine Mix1(F)	1041.33
Ctrl(F)	851		25 mg/L Acylcarnintine Mix1(F)	647.667
Ctrl(F)	639.667		25 mg/L Acylcarnintine Mix1(F)	684.333
Ctrl(F)	834.333		25 mg/L Acylcarnintine Mix1(F)	841
Ctrl(F)	923.667		25 mg/L Acylcarnintine Mix1(F)	902.667
Ctrl(F)	877.667		25 mg/L Acylcarnintine Mix1(F)	859.333
Ctrl(F)	776.333		25 mg/L Acylcarnintine Mix1(F)	786
Ctrl(F)	827.667		25 mg/L Acylcarnintine Mix1(F)	892.333
			25 mg/L Acylcarnintine Mix1(F)	711.333
			25 mg/L Acylcarnintine Mix1(F)	844
Ctrl(F)	1018.33		50 mg/L Acylcarnintine Mix1(F)	902.333
Ctrl(F)	849.667		50 mg/L Acylcarnintine Mix1(F)	601
Ctrl(F)	974.333		50 mg/L Acylcarnintine Mix1(F)	864.333
Ctrl(F)	712.333		50 mg/L Acylcarnintine Mix1(F)	886
Ctrl(F)	832.667		50 mg/L Acylcarnintine Mix1(F)	708.667
Ctrl(F)	773.667		50 mg/L Acylcarnintine Mix1(F)	747.667
Ctrl(F)	900.667		50 mg/L Acylcarnintine Mix1(F)	751
Ctrl(F)	893.333		50 mg/L Acylcarnintine Mix1(F)	879.667
Ctrl(F)	988		50 mg/L Acylcarnintine Mix1(F)	966.667
Ctrl(F)	979		50 mg/L Acylcarnintine Mix1(F)	809
Ctrl(F)	574.667		50 mg/L Acylcarnintine Mix1(F)	848.667
Ctrl(F)	815.333		50 mg/L Acylcarnintine Mix1(F)	751.667
Ctrl(F)	818.667		50 mg/L Acylcarnintine Mix1(F)	927.667
Ctrl(F)	927.333		50 mg/L Acylcarnintine Mix1(F)	899.333
			50 mg/L Acylcarnintine Mix1(F)	820
