# Supplementary material for: Modulation of sleep by trafficking of lipids through the Drosophila blood-brain barrier
Source: eLife. 2023 May 4;12:e86336. doi: 10.7554/eLife.86336 (PMC10205086; doi:10.7554/eLife.86336)
Supplement: Figure 7—figure supplement 2—source data 1. [file elife-86336-fig7-figsupp2-data1.xlsx]

## Sheet: Sheet1
	rDS	rNS	AI	rD aLSE	rD aNSE	rN aLSE	rN aNSE			rDS	rNS	AI	rD aLSE	rD aNSE	rN aLSE	rN aNSE
0.025 mg/L acylcarnitine Mix 2	147.333	439.333	1.59221	7.20635	19.6667	27.3876	16.6667		Ctrl	156.667	454	1.90276	11.7208	12.6667	29.7784	17.6667
0.025 mg/L acylcarnitine Mix 2	219.667	499.333	2.07568	11.0575	20.3333	46.4167	11		Ctrl	406.667	504.333	1.66717	22.0197	18.6667	41.6057	14.3333
0.025 mg/L acylcarnitine Mix 2	294.333	474.333	1.75841	25.7534	11.6667	33.7366	18		Ctrl	347.667	568.667	1.71478	23.6734	15.3333	69.6972	9.66667
0.025 mg/L acylcarnitine Mix 2	207.333	329.667	2.0434	24.0913	9.33333	29.981	15		Ctrl	351.667	536	1.54511	14.3253	25.6667	31.9965	17.6667
0.025 mg/L acylcarnitine Mix 2	429.667	554.667	1.89749	54.6759	8	103.389	7.66667		Ctrl	437.667	546.333	1.89949	30.9747	19.3333	50.2362	13.3333
0.025 mg/L acylcarnitine Mix 2	269	503	2.101	16.6773	17.3333	39.8667	13.3333		Ctrl	421	617	1.65729	23.1283	18.3333	94.7222	8
0.025 mg/L acylcarnitine Mix 2	432.667	509.333	1.7366	21.7481	20.3333	33.4436	15.6667		Ctrl	184	579.333	1.39316	11.5222	17.3333	54.2756	11.3333
0.025 mg/L acylcarnitine Mix 2	59.6667	467.333	1.41263	4.15476	14.3333	25.6842	18.3333		Ctrl	247	442.667	1.89137	15.1212	17.3333	80.5801	15.3333
0.025 mg/L acylcarnitine Mix 2	127	517	2.19002	7.30556	17	231.175	12.3333		Ctrl	219	566	1.75233	13.1875	16.6667	41.5506	14
0.025 mg/L acylcarnitine Mix 2	167.333	522	1.75836	8.00604	19.3333	44.8312	15		Ctrl	292	563.667	2.01734	13.3257	22.3333	42.6283	13.6667
0.025 mg/L acylcarnitine Mix 2	273.333	514.333	2.00048	16.8353	16.6667	39.0281	17		Ctrl	334.667	596	1.9235	23.1795	16.3333	64.6561	10
0.025 mg/L acylcarnitine Mix 2	63	518.333	2.00427	5.75476	10.3333	44.0008	13.3333		Ctrl	79.3333	519.667	1.42175	4.16372	18.6667	36.2354	14.6667
0.025 mg/L acylcarnitine Mix 2	378.667	601.333	2.24889	34.4667	11.3333	121.899	6		Ctrl	262.333	502.333	1.54727	15.4314	17	51.3095	13.3333
0.025 mg/L acylcarnitine Mix 2	313	548.667	1.49927	17.7231	17.6667	61.536	13.6667		Ctrl	311	575.667	1.17645	21.2271	15.6667	42.7526	15.3333
0.025 mg/L acylcarnitine Mix 2	94.3333	419.667	1.82872	4.97199	19	24.135	19		Ctrl	390	654.333	1.49433	24.5166	18	138.693	6.33333
0.025 mg/L acylcarnitine Mix 2	187.333	478.333	1.72543	8.86648	21.3333	31.0938	15.6667		Ctrl	332.667	588.333	1.69856	21.029	19.6667	60.3712	10
0.05 mg/L acylcarnitine Mix 2	419	575.333	1.6845	24.5825	17.6667	55.0503	13.6667		Ctrl	230.333	564.667	2.40334	104.353	5.66667	104.353	5.66667
0.05 mg/L acylcarnitine Mix 2	368.333	550.667	1.48714	16.5965	22.3333	57.0483	10.3333		Ctrl	108.333	585.667	1.4939	120.237	8.33333	120.237	8.33333
0.05 mg/L acylcarnitine Mix 2	195.333	585.333	1.53129	13.4814	18.3333	50.8923	11.6667		Ctrl	284	517.333	2.01792	37.1222	15.3333	37.1222	15.3333
0.05 mg/L acylcarnitine Mix 2	245.667	437.333	1.21948	9.24298	26.6667	23.7486	19.6667		Ctrl	302.667	463.667	2.10122	51.2976	10.6667	51.2976	10.6667
0.05 mg/L acylcarnitine Mix 2	256	526.667	1.49799	12.8805	21.3333	37.619	14		Ctrl	122	532.333	2.44524	69.8861	8	69.8861	8
0.05 mg/L acylcarnitine Mix 2	237.667	548	1.36998	21.374	11.3333	34.2967	16.6667		Ctrl	189.667	509.333	2.21314	37.4698	13.6667	37.4698	13.6667
0.05 mg/L acylcarnitine Mix 2	324.667	498.667	1.57181	11.8987	28.6667	32.5818	19.6667		Ctrl	230.667	544.333	2.58228	41.2574	14.3333	41.2574	14.3333
0.05 mg/L acylcarnitine Mix 2	308.333	489.667	1.97083	20.1321	17	31.366	15.6667		Ctrl	245	575.333	2.15294	98.4806	9.66667	98.4806	9.66667
0.05 mg/L acylcarnitine Mix 2	467	584.667	1.68751	41.2207	14	61.8478	12.6667		Ctrl	104.667	435	1.85403	20.7388	21	20.7388	21
0.05 mg/L acylcarnitine Mix 2	318.667	488	1.6115	19.445	17	38.4597	13.6667		Ctrl	331.333	611.667	1.90174	118.806	6.66667	118.806	6.66667
0.05 mg/L acylcarnitine Mix 2	365.333	602.333	1.73493	21.7343	17.3333	290.058	4.66667		Ctrl	240	561	2.1534	51.5911	11.3333	51.5911	11.3333
0.05 mg/L acylcarnitine Mix 2	393.333	593	1.39765	30.2891	13	82.8095	9.66667		Ctrl	252.667	531	1.81555	36.5342	16.3333	36.5342	16.3333
0.05 mg/L acylcarnitine Mix 2	329	552.333	1.49131	17.576	21.3333	66.4664	12		Ctrl	222.333	579.333	2.1854	67.6583	8.66667	67.6583	8.66667
0.05 mg/L acylcarnitine Mix 2	270.333	533	1.39874	14.0179	20.6667	38.7658	15.3333		Ctrl	245	667	1.62473	173.756	4	173.756	4
0.05 mg/L acylcarnitine Mix 2	243	520	1.02733	10.1916	24.3333	33.5441	16.3333		Ctrl	169.333	523	1.34949	41.2667	13.3333	41.2667	13.3333
0.05 mg/L acylcarnitine Mix 2	281	570.667	2.10905	16.2351	18	239.78	10.3333		Ctrl	127	601	2.16478	85.8777	8.33333	85.8777	8.33333
0.1 mg/L acylcarnitine Mix 2	271.333	549.333	1.24325	17.7936	15.6667	72.4744	8.66667		Ctrl	210.333	445.333	1.95604	9.48157	22	28.4667	16
0.1 mg/L acylcarnitine Mix 2	455	644.333	1.206	21.2842	21.6667	214.667	3		Ctrl	343.333	520	1.65451	17.8648	19.3333	58.6524	9
0.1 mg/L acylcarnitine Mix 2	333	581.667	1.34214	22.6165	15.6667	95.7963	9.33333		Ctrl	217	478.333	2.86912	11.4516	19	51.9177	9.66667
0.1 mg/L acylcarnitine Mix 2	284	464.667	1.21597	14.065	21.3333	36.7441	12.6667		Ctrl	184.667	553.667	2.38975	10.9877	16.6667	90.463	7
0.1 mg/L acylcarnitine Mix 2	357.333	533.667	1.97336	15.6892	23.6667	41.1556	14		Ctrl	173.667	502.667	1.53773	10.3791	17	54.1259	9.33333
0.1 mg/L acylcarnitine Mix 2	371	574.333	1.52285	36.2381	11.6667	75.45	9		Ctrl	235	559.333	1.77433	12.7467	19.3333	41.9111	14.3333
0.1 mg/L acylcarnitine Mix 2	254.333	550	2.13498	18.3638	14.6667	37.3883	15		Ctrl	204	490.667	1.86786	11.1738	18.6667	31.014	16
0.1 mg/L acylcarnitine Mix 2	309	575	1.50568	17.4963	17.6667	51.1298	12.3333		Ctrl	343.667	631.333	1.89882	25.7095	14.6667	247.556	3.33333
0.1 mg/L acylcarnitine Mix 2	437.667	552.667	1.48282	33.8549	18.3333	76.6333	8		Ctrl	266.667	539	1.89138	11.5828	23.6667	52.276	11.6667
0.1 mg/L acylcarnitine Mix 2	421.333	496.667	1.4624	30.9941	13.6667	40.8771	13		Ctrl	58.3333	437	1.86081	4.8812	11.6667	29.1656	15.6667
0.1 mg/L acylcarnitine Mix 2	239.333	458	1.45151	14.6822	16.3333	38.9786	15.3333		Ctrl	294	546.333	1.81618	21.6541	14	57.4227	9.66667
0.1 mg/L acylcarnitine Mix 2	277.667	550.667	1.25957	20.9627	16.6667	53.7239	10.3333		Ctrl	126	489.667	1.89529	11.9167	11.3333	56.7889	10.3333
0.1 mg/L acylcarnitine Mix 2	207.667	494	1.38223	10.8843	20	33.2987	15.3333		Ctrl	194	601	1.59318	8.425	24	73.3598	8.33333
0.1 mg/L acylcarnitine Mix 2	284.667	565.667	1.36926	16.7897	18	57.8074	10.6667		Ctrl	237.333	515.667	2.53549	14.302	17.3333	41.5323	12.6667
0.1 mg/L acylcarnitine Mix 2	205.667	431.667	1.86346	11.985	18.6667	26.9304	16.6667		Ctrl	278	509.333	1.85641	15.243	19	41.7505	15
0.1 mg/L acylcarnitine Mix 2	389.333	518.667	1.55597	17.7328	22.3333	70.5239	15		Ctrl	157.333	519.333	1.8444	8.25926	19.3333	43.3414	12.3333
