# Supplementary material for: Modulation of sleep by trafficking of lipids through the Drosophila blood-brain barrier
Source: eLife. 2023 May 4;12:e86336. doi: 10.7554/eLife.86336 (PMC10205086; doi:10.7554/eLife.86336)
Supplement: Figure 7—figure supplement 3—source data 1. [file elife-86336-fig7-figsupp3-data1.xlsx]

## Sheet: Sheet1
	rDS	rNS	AI	rD aLSE	rD aNSE	rN aLSE	rN aNSE			rDS	rNS	AI	rD aLSE	rD aNSE	rN aLSE	rN aNSE
Ctrl	474.667	610.333	1.55765	60.2866	8.33333	82.2179	9		0.25 mg/L acylcarnitine Mix 2	231.333	541.667	1.30874	11.4533	20.6667	45.3425	13.6667
Ctrl	305.333	606	1.71636	20.2026	15.6667	76.7481	8.33333		0.25 mg/L acylcarnitine Mix 2	294.667	472.333	1.5864	12.59	24.3333	39.3254	14.3333
Ctrl	225	435	1.1664	8.31171	27	23.2809	21.6667		0.25 mg/L acylcarnitine Mix 2	251.333	403.667	1.19497	9.23419	27.3333	19.047	23.3333
Ctrl	373	620.333	1.66139	17.9324	21.3333	138.444	5		0.25 mg/L acylcarnitine Mix 2	345.667	553.667	1.31243	29.7074	12.6667	77.9206	7.33333
Ctrl	271.333	561.667	1.67318	14.8702	18.3333	80.2381	7		0.25 mg/L acylcarnitine Mix 2	283	493.667	1.76646	16.9235	17	38.8523	13.3333
Ctrl	214.333	563.667	1.48624	13.623	18	46.4363	14.3333		0.25 mg/L acylcarnitine Mix 2	424	642.667	1.34102	35.1392	14.3333	199.306	4
Ctrl	298	618.667	1.75957	16.8329	18.6667	355.5	2.66667		0.25 mg/L acylcarnitine Mix 2	320	452.333	1.52671	16.9503	20.6667	52.5185	10.6667
Ctrl	210.333	640.667	2.36132	26.1739	8	160.611	4.33333		0.25 mg/L acylcarnitine Mix 2	250	378.333	1.6242	10.3651	25	22.6946	18.3333
Ctrl	138.667	501	2.01232	10.1944	15	59.8556	14.3333		0.25 mg/L acylcarnitine Mix 2	318	565.333	1.59062	18.3428	18.3333	91.9405	7.33333
Ctrl	321.667	512.667	2.00797	14.9879	22.3333	37.3383	14		0.25 mg/L acylcarnitine Mix 2	419	625.333	1.53073	33.9026	12.6667	131.528	5.66667
Ctrl	302.333	621.333	2.00897	15.8117	20.3333	187.345	4.33333		0.25 mg/L acylcarnitine Mix 2	317.333	608.333	1.47512	13.6261	23.6667	94.2727	7.33333
Ctrl	301.667	576	1.58287	17.1104	19	75.9111	8		0.25 mg/L acylcarnitine Mix 2	311.333	447	1.15376	12.9837	24	44.2933	15.3333
Ctrl	261.333	515	1.54638	11.4572	23	36.285	14.6667		0.25 mg/L acylcarnitine Mix 2	295.333	490.333	1.66738	14.7019	21.6667	45.3745	11.6667
Ctrl	311	516.667	1.29596	15.1714	21	33.0733	17.6667		0.25 mg/L acylcarnitine Mix 2	224.667	495.667	1.52083	11.4365	21	72.0385	9.66667
									0.25 mg/L acylcarnitine Mix 2	390.667	575	2.15605	21.1658	18.6667	83.2619	7
Ctrl	419	599.333	1.56538	33.4832	13.3333	245.542	5.66667		0.5 mg/L acylcarnitine Mix 2	230.333	553	1.51682	13.0915	19.3333	53.6974	11.6667
Ctrl	284	565.667	1.79485	22.399	15	130.331	12.3333		0.5 mg/L acylcarnitine Mix 2	344	600.667	2.1563	28.6114	12.3333	194.222	4.33333
Ctrl	349	625.333	1.50446	24.3826	15	109.189	9		0.5 mg/L acylcarnitine Mix 2	395.333	564	1.76676	26.3258	16.3333	50.4556	11.6667
Ctrl	174.333	538	1.92739	20.8769	10.3333	94.791	9		0.5 mg/L acylcarnitine Mix 2	312	425.667	1.80972	12.8545	24.3333	21.0045	20.3333
Ctrl	279.333	553.333	1.55962	15.6984	18.6667	72.7738	7.66667		0.5 mg/L acylcarnitine Mix 2	378	501.333	1.08985	25.8096	16.3333	60.9949	10.3333
Ctrl	265.333	508.333	1.88516	14.8458	18	41.0744	13.3333		0.5 mg/L acylcarnitine Mix 2	326.333	504	1.41655	17.443	19.6667	46.4004	12
Ctrl	272	628.667	1.70769	31.1482	13.3333	147.333	5		0.5 mg/L acylcarnitine Mix 2	154.333	540	1.40641	11.2358	14.3333	36.4134	15.3333
Ctrl	285	608.333	1.82946	16.5098	19	77.8535	8.33333		0.5 mg/L acylcarnitine Mix 2	467.333	478.333	1.55148	37.8001	17	35.5972	15.6667
Ctrl	378.333	609.667	1.83347	21.5571	17.6667	101.417	7		0.5 mg/L acylcarnitine Mix 2	387.333	580.667	1.39104	16.4956	24	252.595	12
Ctrl	368	611	1.23404	15.315	25	68.4648	9		0.5 mg/L acylcarnitine Mix 2	469	489	1.49902	46.8006	10.3333	61.8823	8
Ctrl	95	479.667	1.34524	4.91035	19.6667	33.6937	14.3333		0.5 mg/L acylcarnitine Mix 2	362	591.667	1.40981	17.9781	20.6667	42.0903	14.3333
Ctrl	271	544.333	1.51634	12.3444	22.3333	75.1703	10.3333		0.5 mg/L acylcarnitine Mix 2	452	651.667	1.73161	24.0647	21	223.322	3.33333
Ctrl	243.333	575.333	1.70353	16.6472	16.6667	117.165	6		0.5 mg/L acylcarnitine Mix 2	411	610	1.88802	37.6566	11	137.403	5
Ctrl	284.667	642.667	2.03615	23.3091	12.3333	156.511	4.33333		0.5 mg/L acylcarnitine Mix 2	368.667	576.667	1.80341	36.5583	11	94.4611	6.33333
									0.5 mg/L acylcarnitine Mix 2	301.333	421.333	1.31028	13.9942	23.6667	21.8786	19.6667
