# Supplementary material for: Modulation of sleep by trafficking of lipids through the Drosophila blood-brain barrier
Source: eLife. 2023 May 4;12:e86336. doi: 10.7554/eLife.86336 (PMC10205086; doi:10.7554/eLife.86336)
Supplement: Figure 7—figure supplement 4—source data 1. [file elife-86336-fig7-figsupp4-data1.xlsx]

## Sheet: Sheet1
	rDS	rNS	AI	rD aLSE	rD aNSE	rN aLSE	rN aNSE			rDS	rNS	AI	rD aLSE	rD aNSE	rN aLSE	rN aNSE
Ctrl	147.333	439.333	1.59221	7.20635	19.6667	27.3876	16.6667		0.025 mg/L acylcarnitine Mix 3	239.333	530.667	1.91115	25.7857	11.6667	84.8593	6.66667
Ctrl	219.667	499.333	2.07568	11.0575	20.3333	46.4167	11		0.025 mg/L acylcarnitine Mix 3	117	499.333	1.70304	9.81217	12.3333	35.7338	15.3333
Ctrl	294.333	474.333	1.75841	25.7534	11.6667	33.7366	18		0.025 mg/L acylcarnitine Mix 3	258.333	560.333	1.34647	10.0722	25.6667	58.0522	12.6667
Ctrl	207.333	329.667	2.0434	24.0913	9.33333	29.981	15		0.025 mg/L acylcarnitine Mix 3	358.667	538.333	1.45297	17.9158	20.6667	66.8333	9.66667
Ctrl	429.667	554.667	1.89749	54.6759	8	103.389	7.66667		0.025 mg/L acylcarnitine Mix 3	317	466.333	1.52687	15.7237	20.3333	45.57	14.6667
Ctrl	269	503	2.101	16.6773	17.3333	39.8667	13.3333		0.025 mg/L acylcarnitine Mix 3	337.333	562	2.1027	21.2317	16.3333	58.3856	10.3333
Ctrl	432.667	509.333	1.7366	21.7481	20.3333	33.4436	15.6667		0.025 mg/L acylcarnitine Mix 3	337.333	579.667	1.68146	19.6277	17.3333	66.597	12.6667
Ctrl	59.6667	467.333	1.41263	4.15476	14.3333	25.6842	18.3333		0.025 mg/L acylcarnitine Mix 3	298	457.333	1.56036	15.3035	19.6667	23.2421	20
Ctrl	127	517	2.19002	7.30556	17	231.175	12.3333		0.025 mg/L acylcarnitine Mix 3	163	523	1.66554	7.69878	21	38.9494	13.6667
Ctrl	167.333	522	1.75836	8.00604	19.3333	44.8312	15		0.025 mg/L acylcarnitine Mix 3	361.333	613	0.926058	19.5228	19.3333	51.4235	12
Ctrl	273.333	514.333	2.00048	16.8353	16.6667	39.0281	17		0.025 mg/L acylcarnitine Mix 3	502	644	1.1596	32.9744	15.6667	158.167	7.66667
Ctrl	63	518.333	2.00427	5.75476	10.3333	44.0008	13.3333		0.025 mg/L acylcarnitine Mix 3	311.333	516.667	1.56334	16.9598	18.3333	58.3536	14
Ctrl	378.667	601.333	2.24889	34.4667	11.3333	121.899	6		0.025 mg/L acylcarnitine Mix 3	258.333	514.333	1.57687	15.2998	17	51.1373	12
Ctrl	313	548.667	1.49927	17.7231	17.6667	61.536	13.6667		0.025 mg/L acylcarnitine Mix 3	237	543	1.96771	15.4526	16	63.7751	9.66667
Ctrl	94.3333	419.667	1.82872	4.97199	19	24.135	19		0.025 mg/L acylcarnitine Mix 3	356.667	651.333	1.71677	20.1657	18	91.381	7.33333
Ctrl	187.333	478.333	1.72543	8.86648	21.3333	31.0938	15.6667		0.025 mg/L acylcarnitine Mix 3	344	471	1.50156	31.4694	12.6667	43.5397	14
Ctrl	230.333	564.667	2.40334	17.0339	15	104.353	5.66667		0.05 mg/L acylcarnitine Mix 3	257.333	575	1.51633	10.7066	24.3333	95.0238	10.6667
Ctrl	108.333	585.667	1.4939	5.48784	17.3333	120.237	8.33333		0.05 mg/L acylcarnitine Mix 3	154.333	502	2.37298	13.3982	12.3333	44.4889	14
Ctrl	284	517.333	2.01792	16.6044	18.3333	37.1222	15.3333		0.05 mg/L acylcarnitine Mix 3	388.333	606.333	1.79967	19.5095	20.3333	114.633	5.33333
Ctrl	302.667	463.667	2.10122	18.2329	17	51.2976	10.6667		0.05 mg/L acylcarnitine Mix 3	447.333	548.333	1.47495	32.5939	14	39.3731	14.3333
Ctrl	122	532.333	2.44524	6.95833	17.3333	69.8861	8		0.05 mg/L acylcarnitine Mix 3	315.667	444.333	1.4186	22.1676	17	72.581	8
Ctrl	189.667	509.333	2.21314	9.66402	20	37.4698	13.6667		0.05 mg/L acylcarnitine Mix 3	277.667	560.667	1.58532	14.1226	22.6667	59.6674	9.66667
Ctrl	230.667	544.333	2.58228	13.6472	17	41.2574	14.3333		0.05 mg/L acylcarnitine Mix 3	291.667	592.667	1.97403	19.4636	16.3333	78.8365	9
Ctrl	245	575.333	2.15294	17.6166	21.6667	98.4806	9.66667		0.05 mg/L acylcarnitine Mix 3	298	602.667	1.52147	15.4419	19.3333	87.95	9
Ctrl	104.667	435	1.85403	5.66369	17.6667	20.7388	21		0.05 mg/L acylcarnitine Mix 3	258	574.333	1.1669	10.8203	23.6667	76.8222	10.6667
Ctrl	331.333	611.667	1.90174	24.2027	14.3333	118.806	6.66667		0.05 mg/L acylcarnitine Mix 3	228	436.333	2.51819	13.1198	17.6667	43.3351	10.6667
Ctrl	240	561	2.1534	14.4217	18	51.5911	11.3333		0.05 mg/L acylcarnitine Mix 3	286.333	494.667	1.84354	17.991	18.3333	59.3534	11.6667
Ctrl	252.667	531	1.81555	14.8003	21	36.5342	16.3333		0.05 mg/L acylcarnitine Mix 3	125.333	453.667	1.93958	6.78581	18.6667	35.2222	15
Ctrl	222.333	579.333	2.1854	11.1608	21	67.6583	8.66667		0.05 mg/L acylcarnitine Mix 3	355.333	552.333	2.4854	25.622	14	73.9	8.33333
Ctrl	245	667	1.62473	13.2379	18.3333	173.756	4		0.05 mg/L acylcarnitine Mix 3	255	547.333	1.75479	11.4065	22.3333	51.6819	12.6667
Ctrl	169.333	523	1.34949	6.09801	28	41.2667	13.3333		0.05 mg/L acylcarnitine Mix 3	196	516	1.60391	12.7505	18	43.3964	14
Ctrl	127	601	2.16478	5.80776	22	85.8777	8.33333
Ctrl	230.333	564.667	2.40334	17.0339	15	104.353	5.66667		0.1 mg/L acylcarnitine Mix 3	257.333	575	1.51633	10.7066	24.3333	95.0238	10.6667
Ctrl	108.333	585.667	1.4939	5.48784	17.3333	120.237	8.33333		0.1 mg/L acylcarnitine Mix 3	154.333	502	2.37298	13.3982	12.3333	44.4889	14
Ctrl	284	517.333	2.01792	16.6044	18.3333	37.1222	15.3333		0.1 mg/L acylcarnitine Mix 3	388.333	606.333	1.79967	19.5095	20.3333	114.633	5.33333
Ctrl	302.667	463.667	2.10122	18.2329	17	51.2976	10.6667		0.1 mg/L acylcarnitine Mix 3	447.333	548.333	1.47495	32.5939	14	39.3731	14.3333
Ctrl	122	532.333	2.44524	6.95833	17.3333	69.8861	8		0.1 mg/L acylcarnitine Mix 3	315.667	444.333	1.4186	22.1676	17	72.581	8
Ctrl	189.667	509.333	2.21314	9.66402	20	37.4698	13.6667		0.1 mg/L acylcarnitine Mix 3	277.667	560.667	1.58532	14.1226	22.6667	59.6674	9.66667
Ctrl	230.667	544.333	2.58228	13.6472	17	41.2574	14.3333		0.1 mg/L acylcarnitine Mix 3	291.667	592.667	1.97403	19.4636	16.3333	78.8365	9
Ctrl	245	575.333	2.15294	17.6166	21.6667	98.4806	9.66667		0.1 mg/L acylcarnitine Mix 3	298	602.667	1.52147	15.4419	19.3333	87.95	9
Ctrl	104.667	435	1.85403	5.66369	17.6667	20.7388	21		0.1 mg/L acylcarnitine Mix 3	258	574.333	1.1669	10.8203	23.6667	76.8222	10.6667
Ctrl	331.333	611.667	1.90174	24.2027	14.3333	118.806	6.66667		0.1 mg/L acylcarnitine Mix 3	228	436.333	2.51819	13.1198	17.6667	43.3351	10.6667
Ctrl	240	561	2.1534	14.4217	18	51.5911	11.3333		0.1 mg/L acylcarnitine Mix 3	286.333	494.667	1.84354	17.991	18.3333	59.3534	11.6667
Ctrl	252.667	531	1.81555	14.8003	21	36.5342	16.3333		0.1 mg/L acylcarnitine Mix 3	125.333	453.667	1.93958	6.78581	18.6667	35.2222	15
Ctrl	222.333	579.333	2.1854	11.1608	21	67.6583	8.66667		0.1 mg/L acylcarnitine Mix 3	355.333	552.333	2.4854	25.622	14	73.9	8.33333
Ctrl	245	667	1.62473	13.2379	18.3333	173.756	4		0.1 mg/L acylcarnitine Mix 3	255	547.333	1.75479	11.4065	22.3333	51.6819	12.6667
Ctrl	169.333	523	1.34949	6.09801	28	41.2667	13.3333		0.1 mg/L acylcarnitine Mix 3	196	516	1.60391	12.7505	18	43.3964	14
Ctrl	127	601	2.16478	5.80776	22	85.8777	8.33333
