# Supplementary material for: Modulation of sleep by trafficking of lipids through the Drosophila blood-brain barrier
Source: eLife. 2023 May 4;12:e86336. doi: 10.7554/eLife.86336 (PMC10205086; doi:10.7554/eLife.86336)
Supplement: Figure 7—figure supplement 5—source data 1. [file elife-86336-fig7-figsupp5-data1.xlsx]

## Sheet: Sheet1
	rDS	rNS	AI	rD aLSE	rD aNSE	rN aLSE	rN aNSE			rDS	rNS	AI	rD aLSE	rD aNSE	rN aLSE	rN aNSE
Ctrl	474.667	610.333	1.55765	60.2866	8.33333	82.2179	9		0.25 mg/L acylcarnitine Mix 3	353.667	497	1.99898	22.4815	16	55.1104	16
Ctrl	305.333	606	1.71636	20.2026	15.6667	76.7481	8.33333		0.25 mg/L acylcarnitine Mix 3	353	605	1.71229	23.6468	15	270.952	5
Ctrl	225	435	1.1664	8.31171	27	23.2809	21.6667		0.25 mg/L acylcarnitine Mix 3	346.667	587.667	1.15817	17.7431	22	54.937	11.3333
Ctrl	373	620.333	1.66139	17.9324	21.3333	138.444	5		0.25 mg/L acylcarnitine Mix 3	245	543.333	2.10198	23.4583	12.6667	97.8047	7.66667
Ctrl	271.333	561.667	1.67318	14.8702	18.3333	80.2381	7		0.25 mg/L acylcarnitine Mix 3	369.333	560	1.96103	28.0454	14.3333	70.9861	8.66667
Ctrl	214.333	563.667	1.48624	13.623	18	46.4363	14.3333		0.25 mg/L acylcarnitine Mix 3	307.667	567.333	2.01387	19.6683	18.3333	54.2609	12.6667
Ctrl	298	618.667	1.75957	16.8329	18.6667	355.5	2.66667		0.25 mg/L acylcarnitine Mix 3	87	483.333	1.32367	6.12466	14	62.1019	11.6667
Ctrl	210.333	640.667	2.36132	26.1739	8	160.611	4.33333		0.25 mg/L acylcarnitine Mix 3	288	537.333	2.34715	16.5871	17.3333	75.6944	8
Ctrl	138.667	501	2.01232	10.1944	15	59.8556	14.3333		0.25 mg/L acylcarnitine Mix 3	353.667	562.667	0.961694	12.7742	28	52.6051	13.3333
Ctrl	321.667	512.667	2.00797	14.9879	22.3333	37.3383	14		0.25 mg/L acylcarnitine Mix 3	350.333	615.333	1.62285	19.5667	18	87.5833	7.66667
Ctrl	302.333	621.333	2.00897	15.8117	20.3333	187.345	4.33333		0.25 mg/L acylcarnitine Mix 3	345.667	580	1.64689	26.3532	14.3333	61.8074	12.6667
Ctrl	301.667	576	1.58287	17.1104	19	75.9111	8		0.25 mg/L acylcarnitine Mix 3	329.333	554.667	1.56077	14.9056	22.6667	59.3452	10
Ctrl	261.333	515	1.54638	11.4572	23	36.285	14.6667		0.25 mg/L acylcarnitine Mix 3	262.667	478	2.05209	19.7126	15	38.9233	14.6667
Ctrl	311	516.667	1.29596	15.1714	21	33.0733	17.6667		0.25 mg/L acylcarnitine Mix 3	336.333	510.667	1.9859	18.5565	20	83.2833	10
									0.25 mg/L acylcarnitine Mix 3	499.333	564.667	1.50996	75.1746	6.66667	97.6383	9.66667
										267.333	560.667	1.48359	16.5625	17	242.898	10.6667
Ctrl	419	599.333	1.56538	33.4832	13.3333	245.542	5.66667		0.5 mg/L acylcarnitine Mix 3	336.667	466.667	1.90676	22.8375	17.6667	232.283	11.6667
Ctrl	284	565.667	1.79485	22.399	15	130.331	12.3333		0.5 mg/L acylcarnitine Mix 3	306	558.667	1.43252	13.0078	24	247.304	7
Ctrl	349	625.333	1.50446	24.3826	15	109.189	9		0.5 mg/L acylcarnitine Mix 3	256.667	527	1.3883	14.8935	20.6667	60.7038	12.6667
Ctrl	174.333	538	1.92739	20.8769	10.3333	94.791	9		0.5 mg/L acylcarnitine Mix 3	265.333	479.333	1.68615	20.8944	15	31.3788	17.3333
Ctrl	279.333	553.333	1.55962	15.6984	18.6667	72.7738	7.66667		0.5 mg/L acylcarnitine Mix 3	227	483.333	1.66848	17.7667	12.6667	65.163	8.66667
Ctrl	265.333	508.333	1.88516	14.8458	18	41.0744	13.3333		0.5 mg/L acylcarnitine Mix 3	311	533.333	0.979759	9.30301	34.3333	47.553	15.6667
Ctrl	272	628.667	1.70769	31.1482	13.3333	147.333	5		0.5 mg/L acylcarnitine Mix 3	319	527	1.67109	22.0913	14.6667	34.1969	17
Ctrl	285	608.333	1.82946	16.5098	19	77.8535	8.33333		0.5 mg/L acylcarnitine Mix 3	278	465.333	1.38041	10.4956	26.3333	24.7008	20
Ctrl	378.333	609.667	1.83347	21.5571	17.6667	101.417	7		0.5 mg/L acylcarnitine Mix 3	470.333	535	1.70463	37.5828	14.3333	89.6111	10.3333
Ctrl	368	611	1.23404	15.315	25	68.4648	9		0.5 mg/L acylcarnitine Mix 3	367.667	542.667	1.71861	23.4962	17.3333	55.6647	10.3333
Ctrl	95	479.667	1.34524	4.91035	19.6667	33.6937	14.3333		0.5 mg/L acylcarnitine Mix 3	384	562.333	1.59684	30.0833	13	61.9103	9.66667
Ctrl	271	544.333	1.51634	12.3444	22.3333	75.1703	10.3333		0.5 mg/L acylcarnitine Mix 3	166.667	389	1.33467	8.41	20.3333	18.3995	23.6667
Ctrl	243.333	575.333	1.70353	16.6472	16.6667	117.165	6		0.5 mg/L acylcarnitine Mix 3	327.333	546.667	1.3401	20.3208	18	91.75	11
Ctrl	284.667	642.667	2.03615	23.3091	12.3333	156.511	4.33333		0.5 mg/L acylcarnitine Mix 3	371.333	554.333	1.61312	21.1838	19.3333	54.7349	11.3333
									0.5 mg/L acylcarnitine Mix 3	327	611.333	1.07855	12.2685	27	63.3421	11.6667
									0.5 mg/L acylcarnitine Mix 3	334	584.333	1.35744	23.1738	15.3333	112.144	6.66667
