# Supplementary material for: Modulation of sleep by trafficking of lipids through the Drosophila blood-brain barrier
Source: eLife. 2023 May 4;12:e86336. doi: 10.7554/eLife.86336 (PMC10205086; doi:10.7554/eLife.86336)
Supplement: Figure 7—source data 1. [file elife-86336-fig7-data1.xlsx]

## Sheet: Sheet1
Treatment	Total Sleep		Treatment	Total Sleep			Treatment	Total Sleep		Treatment	Total Sleep		Treatment	Total Sleep		Treatment	Total Sleep
Ctrl(F)	586.667		2.5 mg/L Acylcarnintine Mix1(F)	869.667			Ctrl(F)	586.667		2.5 mg/L Acylcarnintine Mix2(F)	610.667		Ctrl(F)	586.667		2.5 mg/L Acylcarnintine Mix3(F)	770
Ctrl(F)	719		2.5 mg/L Acylcarnintine Mix1(F)	836.667			Ctrl(F)	719		2.5 mg/L Acylcarnintine Mix2(F)	911		Ctrl(F)	719		2.5 mg/L Acylcarnintine Mix3(F)	616.333
Ctrl(F)	768.667		2.5 mg/L Acylcarnintine Mix1(F)	605.333			Ctrl(F)	768.667		2.5 mg/L Acylcarnintine Mix2(F)	916.333		Ctrl(F)	768.667		2.5 mg/L Acylcarnintine Mix3(F)	818.667
Ctrl(F)	537		2.5 mg/L Acylcarnintine Mix1(F)	591.333			Ctrl(F)	537		2.5 mg/L Acylcarnintine Mix2(F)	887.667		Ctrl(F)	537		2.5 mg/L Acylcarnintine Mix3(F)	897
Ctrl(F)	984.333		2.5 mg/L Acylcarnintine Mix1(F)	962			Ctrl(F)	984.333		2.5 mg/L Acylcarnintine Mix2(F)	984		Ctrl(F)	984.333		2.5 mg/L Acylcarnintine Mix3(F)	783.333
Ctrl(F)	772		2.5 mg/L Acylcarnintine Mix1(F)	673			Ctrl(F)	772		2.5 mg/L Acylcarnintine Mix2(F)	1038		Ctrl(F)	772		2.5 mg/L Acylcarnintine Mix3(F)	899.333
Ctrl(F)	942		2.5 mg/L Acylcarnintine Mix1(F)	612.667			Ctrl(F)	942		2.5 mg/L Acylcarnintine Mix2(F)	763.333		Ctrl(F)	942		2.5 mg/L Acylcarnintine Mix3(F)	917
Ctrl(F)	527		2.5 mg/L Acylcarnintine Mix1(F)	816			Ctrl(F)	527		2.5 mg/L Acylcarnintine Mix2(F)	689.667		Ctrl(F)	527		2.5 mg/L Acylcarnintine Mix3(F)	755.333
Ctrl(F)	644		2.5 mg/L Acylcarnintine Mix1(F)	606.333			Ctrl(F)	644		2.5 mg/L Acylcarnintine Mix2(F)	785		Ctrl(F)	644		2.5 mg/L Acylcarnintine Mix3(F)	686
Ctrl(F)	689.333		2.5 mg/L Acylcarnintine Mix1(F)	816			Ctrl(F)	689.333		2.5 mg/L Acylcarnintine Mix2(F)	855.667		Ctrl(F)	689.333		2.5 mg/L Acylcarnintine Mix3(F)	974.333
Ctrl(F)	787.667		2.5 mg/L Acylcarnintine Mix1(F)	788.667			Ctrl(F)	787.667		2.5 mg/L Acylcarnintine Mix2(F)	930.667		Ctrl(F)	787.667		2.5 mg/L Acylcarnintine Mix3(F)	1146
Ctrl(F)	581.333		2.5 mg/L Acylcarnintine Mix1(F)	1160.67			Ctrl(F)	581.333		2.5 mg/L Acylcarnintine Mix2(F)	599		Ctrl(F)	581.333		2.5 mg/L Acylcarnintine Mix3(F)	828
Ctrl(F)	980		2.5 mg/L Acylcarnintine Mix1(F)	691.667			Ctrl(F)	980		2.5 mg/L Acylcarnintine Mix2(F)	764.667		Ctrl(F)	980		2.5 mg/L Acylcarnintine Mix3(F)	772.667
Ctrl(F)	861.667		2.5 mg/L Acylcarnintine Mix1(F)	597			Ctrl(F)	861.667		2.5 mg/L Acylcarnintine Mix2(F)	886.667		Ctrl(F)	861.667		2.5 mg/L Acylcarnintine Mix3(F)	780
Ctrl(F)	514						Ctrl(F)	514		2.5 mg/L Acylcarnintine Mix2(F)	1044.33		Ctrl(F)	514		2.5 mg/L Acylcarnintine Mix3(F)	1008
Ctrl(F)	665.667						Ctrl(F)	665.667		2.5 mg/L Acylcarnintine Mix2(F)	921		Ctrl(F)	665.667		2.5 mg/L Acylcarnintine Mix3(F)	815
Ctrl(F)	795		5 mg/L Acylcarnintine Mix1(F)	775.667			Ctrl(F)	795		5 mg/L Acylcarnintine Mix2(F)	994.333		Ctrl(F)	795		5 mg/L Acylcarnintine Mix3(F)	832.333
Ctrl(F)	694		5 mg/L Acylcarnintine Mix1(F)	705.333			Ctrl(F)	694		5 mg/L Acylcarnintine Mix2(F)	919		Ctrl(F)	694		5 mg/L Acylcarnintine Mix3(F)	656.333
Ctrl(F)	801.333		5 mg/L Acylcarnintine Mix1(F)	788.333			Ctrl(F)	801.333		5 mg/L Acylcarnintine Mix2(F)	780.667		Ctrl(F)	801.333		5 mg/L Acylcarnintine Mix3(F)	994.667
Ctrl(F)	766.333		5 mg/L Acylcarnintine Mix1(F)	735.667			Ctrl(F)	766.333		5 mg/L Acylcarnintine Mix2(F)	683		Ctrl(F)	766.333		5 mg/L Acylcarnintine Mix3(F)	995.667
Ctrl(F)	654.333		5 mg/L Acylcarnintine Mix1(F)	711.667			Ctrl(F)	654.333		5 mg/L Acylcarnintine Mix2(F)	782.667		Ctrl(F)	654.333		5 mg/L Acylcarnintine Mix3(F)	760
Ctrl(F)	699		5 mg/L Acylcarnintine Mix1(F)	876.333			Ctrl(F)	699		5 mg/L Acylcarnintine Mix2(F)	785.667		Ctrl(F)	699		5 mg/L Acylcarnintine Mix3(F)	838.333
Ctrl(F)	775		5 mg/L Acylcarnintine Mix1(F)	786.333			Ctrl(F)	775		5 mg/L Acylcarnintine Mix2(F)	823.333		Ctrl(F)	775		5 mg/L Acylcarnintine Mix3(F)	884.333
Ctrl(F)	820.333		5 mg/L Acylcarnintine Mix1(F)	850			Ctrl(F)	820.333		5 mg/L Acylcarnintine Mix2(F)	798		Ctrl(F)	820.333		5 mg/L Acylcarnintine Mix3(F)	900.667
Ctrl(F)	539.667		5 mg/L Acylcarnintine Mix1(F)	695			Ctrl(F)	539.667		5 mg/L Acylcarnintine Mix2(F)	1051.67		Ctrl(F)	539.667		5 mg/L Acylcarnintine Mix3(F)	832.333
Ctrl(F)	943		5 mg/L Acylcarnintine Mix1(F)	1338			Ctrl(F)	943		5 mg/L Acylcarnintine Mix2(F)	806.667		Ctrl(F)	943		5 mg/L Acylcarnintine Mix3(F)	664.333
Ctrl(F)	801		5 mg/L Acylcarnintine Mix1(F)	839			Ctrl(F)	801		5 mg/L Acylcarnintine Mix2(F)	967.667		Ctrl(F)	801		5 mg/L Acylcarnintine Mix3(F)	781
Ctrl(F)	783.667		5 mg/L Acylcarnintine Mix1(F)	600.333			Ctrl(F)	783.667		5 mg/L Acylcarnintine Mix2(F)	986.333		Ctrl(F)	783.667		5 mg/L Acylcarnintine Mix3(F)	579
Ctrl(F)	801.667		5 mg/L Acylcarnintine Mix1(F)	621			Ctrl(F)	801.667		5 mg/L Acylcarnintine Mix2(F)	881.333		Ctrl(F)	801.667		5 mg/L Acylcarnintine Mix3(F)	907.667
Ctrl(F)	912		5 mg/L Acylcarnintine Mix1(F)	659.667			Ctrl(F)	912		5 mg/L Acylcarnintine Mix2(F)	803.333		Ctrl(F)	912		5 mg/L Acylcarnintine Mix3(F)	802.333
Ctrl(F)	692.333		5 mg/L Acylcarnintine Mix1(F)	660.333			Ctrl(F)	692.333		5 mg/L Acylcarnintine Mix2(F)	763		Ctrl(F)	692.333		5 mg/L Acylcarnintine Mix3(F)	712
Ctrl(F)	728		5 mg/L Acylcarnintine Mix1(F)	674			Ctrl(F)	728		5 mg/L Acylcarnintine Mix2(F)	851.667		Ctrl(F)	728
Ctrl(F)	655.667		10 mg/L Acylcarnintine Mix1(F)	625.667			Ctrl(F)	655.667		10 mg/L Acylcarnintine Mix2(F)	994.333		Ctrl(F)	655.667		10 mg/L Acylcarnintine Mix3(F)	810
Ctrl(F)	863.333		10 mg/L Acylcarnintine Mix1(F)	642			Ctrl(F)	863.333		10 mg/L Acylcarnintine Mix2(F)	919		Ctrl(F)	863.333		10 mg/L Acylcarnintine Mix3(F)	678.333
Ctrl(F)	695.333		10 mg/L Acylcarnintine Mix1(F)	639			Ctrl(F)	695.333		10 mg/L Acylcarnintine Mix2(F)	780.667		Ctrl(F)	695.333		10 mg/L Acylcarnintine Mix3(F)	940.333
Ctrl(F)	738.333		10 mg/L Acylcarnintine Mix1(F)	791.667			Ctrl(F)	738.333		10 mg/L Acylcarnintine Mix2(F)	683		Ctrl(F)	738.333		10 mg/L Acylcarnintine Mix3(F)	792.667
Ctrl(F)	676.333		10 mg/L Acylcarnintine Mix1(F)	815			Ctrl(F)	676.333		10 mg/L Acylcarnintine Mix2(F)	782.667		Ctrl(F)	676.333		10 mg/L Acylcarnintine Mix3(F)	883
Ctrl(F)	794.333		10 mg/L Acylcarnintine Mix1(F)	723.333			Ctrl(F)	794.333		10 mg/L Acylcarnintine Mix2(F)	785.667		Ctrl(F)	794.333		10 mg/L Acylcarnintine Mix3(F)	978.667
Ctrl(F)	694.667		10 mg/L Acylcarnintine Mix1(F)	733.667			Ctrl(F)	694.667		10 mg/L Acylcarnintine Mix2(F)	823.333		Ctrl(F)	694.667		10 mg/L Acylcarnintine Mix3(F)	959.333
Ctrl(F)	975		10 mg/L Acylcarnintine Mix1(F)	877.333			Ctrl(F)	975		10 mg/L Acylcarnintine Mix2(F)	798		Ctrl(F)	975		10 mg/L Acylcarnintine Mix3(F)	764
Ctrl(F)	805.667		10 mg/L Acylcarnintine Mix1(F)	601			Ctrl(F)	805.667		10 mg/L Acylcarnintine Mix2(F)	1051.67		Ctrl(F)	805.667		10 mg/L Acylcarnintine Mix3(F)	791.333
Ctrl(F)	495.333		10 mg/L Acylcarnintine Mix1(F)	961			Ctrl(F)	495.333		10 mg/L Acylcarnintine Mix2(F)	806.667		Ctrl(F)	495.333		10 mg/L Acylcarnintine Mix3(F)	660
Ctrl(F)	840.333		10 mg/L Acylcarnintine Mix1(F)	724.333			Ctrl(F)	840.333		10 mg/L Acylcarnintine Mix2(F)	967.667		Ctrl(F)	840.333		10 mg/L Acylcarnintine Mix3(F)	947.667
Ctrl(F)	615.667		10 mg/L Acylcarnintine Mix1(F)	786.667			Ctrl(F)	615.667		10 mg/L Acylcarnintine Mix2(F)	986.333		Ctrl(F)	615.667		10 mg/L Acylcarnintine Mix3(F)	985.667
Ctrl(F)	795		10 mg/L Acylcarnintine Mix1(F)	637.667			Ctrl(F)	795		10 mg/L Acylcarnintine Mix2(F)	881.333		Ctrl(F)	795		10 mg/L Acylcarnintine Mix3(F)	1024.67
Ctrl(F)	753		10 mg/L Acylcarnintine Mix1(F)	837.333			Ctrl(F)	753		10 mg/L Acylcarnintine Mix2(F)	803.333		Ctrl(F)	753		10 mg/L Acylcarnintine Mix3(F)	1023.33
Ctrl(F)	787.333						Ctrl(F)	787.333		10 mg/L Acylcarnintine Mix2(F)	763		Ctrl(F)	787.333		10 mg/L Acylcarnintine Mix3(F)	853
Ctrl(F)	676.667						Ctrl(F)	676.667		10 mg/L Acylcarnintine Mix2(F)	851.667		Ctrl(F)	676.667
Ctrl(F)	1085		25 mg/L Acylcarnintine Mix1(F)	696.333			Ctrl(F)	1085		25 mg/L Acylcarnintine Mix2(F)	773		Ctrl(F)	1085		25 mg/L Acylcarnintine Mix3(F)	850.667
Ctrl(F)	911.333		25 mg/L Acylcarnintine Mix1(F)	630			Ctrl(F)	911.333		25 mg/L Acylcarnintine Mix2(F)	767		Ctrl(F)	911.333		25 mg/L Acylcarnintine Mix3(F)	958
Ctrl(F)	660		25 mg/L Acylcarnintine Mix1(F)	926.667			Ctrl(F)	660		25 mg/L Acylcarnintine Mix2(F)	655		Ctrl(F)	660		25 mg/L Acylcarnintine Mix3(F)	934.333
Ctrl(F)	993.333		25 mg/L Acylcarnintine Mix1(F)	769			Ctrl(F)	993.333		25 mg/L Acylcarnintine Mix2(F)	899.333		Ctrl(F)	993.333		25 mg/L Acylcarnintine Mix3(F)	788.333
Ctrl(F)	833		25 mg/L Acylcarnintine Mix1(F)	732.667			Ctrl(F)	833		25 mg/L Acylcarnintine Mix2(F)	776.667		Ctrl(F)	833		25 mg/L Acylcarnintine Mix3(F)	929.333
Ctrl(F)	778		25 mg/L Acylcarnintine Mix1(F)	796.667			Ctrl(F)	778		25 mg/L Acylcarnintine Mix2(F)	1066.67		Ctrl(F)	778		25 mg/L Acylcarnintine Mix3(F)	875
Ctrl(F)	916.667		25 mg/L Acylcarnintine Mix1(F)	1041.33			Ctrl(F)	916.667		25 mg/L Acylcarnintine Mix2(F)	772.333		Ctrl(F)	916.667		25 mg/L Acylcarnintine Mix3(F)	570.333
Ctrl(F)	851		25 mg/L Acylcarnintine Mix1(F)	647.667			Ctrl(F)			25 mg/L Acylcarnintine Mix2(F)	628.333		Ctrl(F)	851		25 mg/L Acylcarnintine Mix3(F)	825.333
Ctrl(F)	639.667		25 mg/L Acylcarnintine Mix1(F)	684.333			Ctrl(F)	851		25 mg/L Acylcarnintine Mix2(F)			Ctrl(F)	639.667		25 mg/L Acylcarnintine Mix3(F)	916.333
Ctrl(F)	834.333		25 mg/L Acylcarnintine Mix1(F)	841			Ctrl(F)	639.667		25 mg/L Acylcarnintine Mix2(F)	883.333		Ctrl(F)	834.333		25 mg/L Acylcarnintine Mix3(F)	965.667
Ctrl(F)	923.667		25 mg/L Acylcarnintine Mix1(F)	902.667			Ctrl(F)	834.333		25 mg/L Acylcarnintine Mix2(F)	1044.33		Ctrl(F)	923.667		25 mg/L Acylcarnintine Mix3(F)	925.667
Ctrl(F)	877.667		25 mg/L Acylcarnintine Mix1(F)	859.333			Ctrl(F)	923.667		25 mg/L Acylcarnintine Mix2(F)	925.667		Ctrl(F)	877.667		25 mg/L Acylcarnintine Mix3(F)	884
Ctrl(F)	776.333		25 mg/L Acylcarnintine Mix1(F)	786			Ctrl(F)	877.667		25 mg/L Acylcarnintine Mix2(F)	758.333		Ctrl(F)	776.333		25 mg/L Acylcarnintine Mix3(F)	740.667
Ctrl(F)	827.667		25 mg/L Acylcarnintine Mix1(F)	892.333			Ctrl(F)			25 mg/L Acylcarnintine Mix2(F)	785.667		Ctrl(F)	827.667		25 mg/L Acylcarnintine Mix3(F)	847
			25 mg/L Acylcarnintine Mix1(F)	711.333			Ctrl(F)	776.333		25 mg/L Acylcarnintine Mix2(F)	720.333		Ctrl(F)			25 mg/L Acylcarnintine Mix3(F)	1064
			25 mg/L Acylcarnintine Mix1(F)	844			Ctrl(F)	827.667		25 mg/L Acylcarnintine Mix2(F)	965.667		Ctrl(F)			25 mg/L Acylcarnintine Mix3(F)	828
Ctrl(F)	1018.33		50 mg/L Acylcarnintine Mix1(F)	902.333			Ctrl(F)	1018.33		50 mg/L Acylcarnintine Mix2(F)	783.333		Ctrl(F)	1018.33		50 mg/L Acylcarnintine Mix3(F)	803.333
Ctrl(F)	849.667		50 mg/L Acylcarnintine Mix1(F)	601			Ctrl(F)	849.667		50 mg/L Acylcarnintine Mix2(F)	944.667		Ctrl(F)	849.667		50 mg/L Acylcarnintine Mix3(F)	864.667
Ctrl(F)	974.333		50 mg/L Acylcarnintine Mix1(F)	864.333			Ctrl(F)	974.333		50 mg/L Acylcarnintine Mix2(F)	959.333		Ctrl(F)	974.333		50 mg/L Acylcarnintine Mix3(F)	783.667
Ctrl(F)	712.333		50 mg/L Acylcarnintine Mix1(F)	886			Ctrl(F)	712.333		50 mg/L Acylcarnintine Mix2(F)	737.667		Ctrl(F)	712.333		50 mg/L Acylcarnintine Mix3(F)	744.667
Ctrl(F)	832.667		50 mg/L Acylcarnintine Mix1(F)	708.667			Ctrl(F)	832.667		50 mg/L Acylcarnintine Mix2(F)	879.333		Ctrl(F)	832.667		50 mg/L Acylcarnintine Mix3(F)	710.333
Ctrl(F)	773.667		50 mg/L Acylcarnintine Mix1(F)	747.667			Ctrl(F)	773.667		50 mg/L Acylcarnintine Mix2(F)	830.333		Ctrl(F)	773.667		50 mg/L Acylcarnintine Mix3(F)	844.333
Ctrl(F)	900.667		50 mg/L Acylcarnintine Mix1(F)	751			Ctrl(F)	900.667		50 mg/L Acylcarnintine Mix2(F)	694.333		Ctrl(F)	900.667		50 mg/L Acylcarnintine Mix3(F)	846
Ctrl(F)	893.333		50 mg/L Acylcarnintine Mix1(F)	879.667			Ctrl(F)	893.333		50 mg/L Acylcarnintine Mix2(F)	945.667		Ctrl(F)	893.333		50 mg/L Acylcarnintine Mix3(F)	743.333
Ctrl(F)	988		50 mg/L Acylcarnintine Mix1(F)	966.667			Ctrl(F)	988		50 mg/L Acylcarnintine Mix2(F)	968		Ctrl(F)	988		50 mg/L Acylcarnintine Mix3(F)	1005.33
Ctrl(F)	979		50 mg/L Acylcarnintine Mix1(F)	809			Ctrl(F)	979		50 mg/L Acylcarnintine Mix2(F)	958		Ctrl(F)	979		50 mg/L Acylcarnintine Mix3(F)	910.333
Ctrl(F)	574.667		50 mg/L Acylcarnintine Mix1(F)	848.667			Ctrl(F)	574.667		50 mg/L Acylcarnintine Mix2(F)	953.667		Ctrl(F)	574.667		50 mg/L Acylcarnintine Mix3(F)	946.333
Ctrl(F)	815.333		50 mg/L Acylcarnintine Mix1(F)	751.667			Ctrl(F)	815.333		50 mg/L Acylcarnintine Mix2(F)	1103.67		Ctrl(F)	815.333		50 mg/L Acylcarnintine Mix3(F)	555.667
Ctrl(F)	818.667		50 mg/L Acylcarnintine Mix1(F)	927.667			Ctrl(F)	818.667		50 mg/L Acylcarnintine Mix2(F)	1021		Ctrl(F)	818.667		50 mg/L Acylcarnintine Mix3(F)	874
Ctrl(F)	927.333		50 mg/L Acylcarnintine Mix1(F)	899.333			Ctrl(F)	927.333		50 mg/L Acylcarnintine Mix2(F)	945.333		Ctrl(F)	927.333		50 mg/L Acylcarnintine Mix3(F)	925.667
			50 mg/L Acylcarnintine Mix1(F)	820						50 mg/L Acylcarnintine Mix2(F)	722.667		Ctrl(F)			50 mg/L Acylcarnintine Mix3(F)	938.333
													Ctrl(F)				918.333
