# Supplementary material for: Modulation of sleep by trafficking of lipids through the Drosophila blood-brain barrier
Source: eLife. 2023 May 4;12:e86336. doi: 10.7554/eLife.86336 (PMC10205086; doi:10.7554/eLife.86336)
Supplement: Figure 8—figure supplement 1—source data 1. [file elife-86336-fig8-figsupp1-data1.xlsx]

## Sheet: Sheet1
	rDS	rNS	AI	rD aLSE	rD aNSE	rN aLSE	rN aNSE			rDS	rNS	AI	rD aLSE	rD aNSE	rN aLSE	rN aNSE
Ctrl	298.333	603.333	1.86545	17.5585	18	70.9862	11.3333		0.0125 +0.0125 mg/L Acylcarnitine Mix 2 +3	148	551.333	1.70636	9.73558	15	76.1026	11.6667
Ctrl	268	612.667	1.81455	12.0439	22.3333	114.55	6.33333		0.0125 +0.0125 mg/L Acylcarnitine Mix 2 +3	228	618	1.63978	22.197	12.6667	124.766	6
Ctrl	324.667	568.667	2.00134	23.4311	14	190.722	3.66667		0.0125 +0.0125 mg/L Acylcarnitine Mix 2 +3	338	678.333	1.93963	29.4863	11.6667	207.389	3.33333
Ctrl	234	589.667	1.90553	10.1522	23.3333	73.1465	8.66667		0.0125 +0.0125 mg/L Acylcarnitine Mix 2 +3	282	639	1.86445	25.4655	11.3333	106.793	7.66667
Ctrl	355	629	2.33944	23.2287	16.6667	133.113	6.33333		0.0125 +0.0125 mg/L Acylcarnitine Mix 2 +3	231.333	613.667	2.17218	17.0433	15.6667	110.472	6
Ctrl	172.333	623	1.7464	11.9505	15	78.137	10.6667		0.0125 +0.0125 mg/L Acylcarnitine Mix 2 +3	365	649	1.69241	18.6471	21.3333	85.1607	7.66667
Ctrl	248.333	651.333	1.97028	16.5776	15.6667	169.717	4		0.0125 +0.0125 mg/L Acylcarnitine Mix 2 +3	352.333	562.667	1.63255	25.3373	15.6667	73.4074	8
Ctrl	182.333	517.333	1.35986	13.5476	13.3333	84.9537	7		0.0125 +0.0125 mg/L Acylcarnitine Mix 2 +3	280.333	660.333	1.75615	19.117	15	135.678	5
Ctrl	322.333	605	1.85567	31.5734	10.6667	144.458	5		0.0125 +0.0125 mg/L Acylcarnitine Mix 2 +3	445.667	576.333	1.69214	48.641	10.6667	89.8222	7
Ctrl	371.333	654	1.40408	26.1559	15.3333	371.833	2.66667		0.0125 +0.0125 mg/L Acylcarnitine Mix 2 +3	411.333	571.667	1.696	73.6468	10.6667	49.201	12
Ctrl	191	631.667	2.09835	8.93167	21.3333	80.5635	9		0.0125 +0.0125 mg/L Acylcarnitine Mix 2 +3	407.333	639.333	1.56415	29.5694	14.6667	112.161	8.66667
Ctrl	271.333	577.333	1.71251	16.9179	16.6667	136.089	4.66667		0.0125 +0.0125 mg/L Acylcarnitine Mix 2 +3	227	550	1.83675	20.3493	14	73.6151	8.33333
Ctrl	172	628	1.71383	8.85313	20	74.6994	9.33333		0.0125 +0.0125 mg/L Acylcarnitine Mix 2 +3	435.667	584	1.92354	52.5111	9	142.578	4.33333
Ctrl	202.667	530.333	1.68179	8.80597	23	90.9952	6		0.0125 +0.0125 mg/L Acylcarnitine Mix 2 +3	266	502.333	1.83863	21.7008	12.6667	56.5076	9
Ctrl	281.333	583.333	1.49495	12.4468	23.6667	97.4119	7		0.0125 +0.0125 mg/L Acylcarnitine Mix 2 +3	412	616.667	1.54956	26.2436	16.3333	127.9	5
Ctrl	246.667	602.667	1.93142	28.3492	11.3333	150.933	7		0.0125 +0.0125 mg/L Acylcarnitine Mix 2 +3	267	509	1.89624	28.5403	11.3333	57.8153	10.6667
Ctrl	123	583	2.55402	5.93991	21	48.4897	12.3333		0.0125 +0.0125 mg/L Acylcarnitine Mix 2 +3	249.333	483	1.58244	18.5278	13.3333	24.1481	20.6667
Ctrl	437	628	2.23746	53.7381	9.33333	200.288	5.33333		0.0125 +0.0125 mg/L Acylcarnitine Mix 2 +3	446.333	663.667	2.18378	70.4188	9.33333	246.9	4.66667
Ctrl	217	581.333	1.55617	8.17145	27	43.2752	15.6667		0.0125 +0.0125 mg/L Acylcarnitine Mix 2 +3	82.6667	573.333	1.60684	5.73126	14.6667	51.7577	12
Ctrl	154.333	494	1.57544	9.98127	15.6667	53.0556	9.33333		0.0125 +0.0125 mg/L Acylcarnitine Mix 2 +3	319.333	647.667	1.68001	22.5739	14.6667	139.881	5
Ctrl	199	492	1.55069	9.01058	23	33.9839	18		0.0125 +0.0125 mg/L Acylcarnitine Mix 2 +3	371.333	646	1.62864	20.1128	19.3333	109.519	6.66667
Ctrl	94.3333	615.667	1.57817	6.03634	15.6667	59.4889	11		0.0125 +0.0125 mg/L Acylcarnitine Mix 2 +3	425.333	632.333	1.84173	41.0879	10.3333	101.046	7.33333
Ctrl	358	662.667	1.42762	27.4111	14	314.81	4		0.0125 +0.0125 mg/L Acylcarnitine Mix 2 +3	335.667	598.333	1.95416	28.037	13	107.69	6
Ctrl	161.667	652	1.44659	8.16587	20	115.967	5.66667		0.0125 +0.0125 mg/L Acylcarnitine Mix 2 +3	480.333	589.667	2.01885	50.2169	12.3333	82.3016	10
Ctrl	226	597.333	2.15222	13.1061	18	49.8772	14		0.0125 +0.0125 mg/L Acylcarnitine Mix 2 +3	445.333	676	1.98546	78.2	6.66667	188.028	3.66667
Ctrl	331.333	602.667	1.67902	22.3149	15.3333	76.8131	9.33333		0.0125 +0.0125 mg/L Acylcarnitine Mix 2 +3	223.667	561.667	2.32605	13.1307	19.6667	62.1553	14.6667
Ctrl	278.667	629	1.75003	18.4083	17	83.3944	9.33333		0.0125 +0.0125 mg/L Acylcarnitine Mix 2 +3	190	583	2.21774	8.6851	22.6667	54.5476	11.3333
Ctrl	167.667	583.667	1.92745	9.13486	18.3333	137.714	9.66667		0.0125 +0.0125 mg/L Acylcarnitine Mix 2 +3	401	604.667	1.07759	23.5742	17.6667	67.2576	9.66667
Ctrl	273.333	602.333	2.15815	19.6841	14.6667	117.444	5.33333		0.0125 +0.0125 mg/L Acylcarnitine Mix 2 +3	413.333	604	2.51832	62.9167	8.66667	219.667	3
Ctrl	292.667	620.667	2.03745	18.3161	16	92.1111	7		0.0125 +0.0125 mg/L Acylcarnitine Mix 2 +3	356	516.333	1.86885	28.697	14.3333	37.1944	15
Ctrl	347.333	629.333	1.74087	17.1184	22	109.435	6.33333		0.0125 +0.0125 mg/L Acylcarnitine Mix 2 +3	552.667	635.333	1.14491	74.4333	8.66667	178.396	7.33333
Ctrl	95.3333	653.667	1.56302	4.66808	19.6667	285.31	6		0.0125 +0.0125 mg/L Acylcarnitine Mix 2 +3	362	659.667	2.08399	29.1356	13	150.361	6.33333
Ctrl	446.333	616.667	2.17918	43.8722	10.3333	295.333	3.66667		0.025 +0.025 mg/L Acylcarnitine Mix 2 +3	418	599	1.71657	46.4815	9	104.9	6
Ctrl	323	607	1.91671	19.3075	18.3333	157.273	6.33333		0.025 +0.025 mg/L Acylcarnitine Mix 2 +3	267.333	641.667	2.02516	24.5231	13.3333	79.3846	9
Ctrl	260.667	609.667	1.73989	17.2707	16	93.4167	6.66667		0.025 +0.025 mg/L Acylcarnitine Mix 2 +3	215.333	663	1.91469	13.0605	16.3333	184.389	3.66667
Ctrl	319.667	665	1.65692	20.4094	16	259	2.66667		0.025 +0.025 mg/L Acylcarnitine Mix 2 +3	206.667	652.333	1.93186	9.92271	21	90.8611	7.33333
Ctrl	259.667	545.333	1.63057	17.4236	15	71.9111	8		0.025 +0.025 mg/L Acylcarnitine Mix 2 +3	294	518	2.01685	29.9762	10.3333	40.6558	13
Ctrl	300.333	645.667	1.77953	21.6745	14.6667	91.5037	7.66667		0.025 +0.025 mg/L Acylcarnitine Mix 2 +3	423.667	686	1.88028	39.1101	13.3333	247.333	3
Ctrl	236.667	649	1.29239	13.1452	20	203.456	5		0.025 +0.025 mg/L Acylcarnitine Mix 2 +3	384	572.667	1.73639	37.3662	10.6667	57.3333	12.6667
Ctrl	379	624.667	1.87989	42.287	9.33333	121.861	5.33333		0.025 +0.025 mg/L Acylcarnitine Mix 2 +3	360.667	693	1.89375	18.8148	19.3333	389.778	3
Ctrl	382	609.667	1.31822	25.0502	15.6667	195.117	3.66667		0.025 +0.025 mg/L Acylcarnitine Mix 2 +3	492.667	639.667	2.20807	50.1111	10	192.964	4.33333
Ctrl	434.667	589.667	1.61969	32.0266	14.3333	173.478	4.33333		0.025 +0.025 mg/L Acylcarnitine Mix 2 +3	229.333	569	1.70448	22.85	10	71.0407	8.33333
Ctrl	323.333	575.667	1.73332	22.2588	14.6667	122.293	6.33333		0.025 +0.025 mg/L Acylcarnitine Mix 2 +3	399	586.333	2.05926	45.1954	9.66667	103.717	6
Ctrl	320.667	595	1.3926	30.4544	11.6667	94.3175	6.33333		0.025 +0.025 mg/L Acylcarnitine Mix 2 +3	559.667	664	1.33101	149.603	4.33333	332	2
Ctrl	294.333	557.667	1.73813	19.2306	16	62.4213	9		0.025 +0.025 mg/L Acylcarnitine Mix 2 +3	380	586.667	2.48482	52.8466	7.33333	100.582	9.66667
Ctrl	299.333	614	1.69149	27.131	12	114.508	5.66667		0.025 +0.025 mg/L Acylcarnitine Mix 2 +3	333.667	657.333	1.77476	25.2737	14.3333	145.861	4.66667
Ctrl	295.667	620	1.86159	23.3128	13.3333	85.9037	8		0.025 +0.025 mg/L Acylcarnitine Mix 2 +3	458	616.333	1.9915	55.2692	9.33333	122.417	7
Ctrl	483.333	646.333	1.65021	42.8477	13.3333	317.167	3.33333		0.025 +0.025 mg/L Acylcarnitine Mix 2 +3	393.333	598.667	2.29828	52.0926	8	122.511	5
Ctrl	350	625	1.56082	19.7168	18.3333	106.027	6		0.025 +0.025 mg/L Acylcarnitine Mix 2 +3	408	683	2.19503	69.3794	6	247.444	3
Ctrl	138	572	1.44723	9.3254	15	67.202	9.33333		0.025 +0.025 mg/L Acylcarnitine Mix 2 +3	425	659.333	1.65521	27.5263	16.6667	236.806	3
Ctrl	404.667	553	1.14266	33.5088	13	80.3234	7		0.025 +0.025 mg/L Acylcarnitine Mix 2 +3	497.667	588.667	1.77069	55.3338	9.33333	285.966	10.6667
Ctrl	339.667	571.333	1.52336	23.1534	14.3333	90.0387	9		0.025 +0.025 mg/L Acylcarnitine Mix 2 +3	431.667	676.333	1.78738	33.2869	13	206.833	3.33333
Ctrl	334.333	576.333	1.53064	20.4375	16.6667	54.4233	11		0.025 +0.025 mg/L Acylcarnitine Mix 2 +3	410.667	663.333	1.70488	30.2913	15.3333	213.55	3.66667
Ctrl	362.667	612	2.22919	39.3079	10.3333	172.11	4.66667		0.025 +0.025 mg/L Acylcarnitine Mix 2 +3	409	691.333	1.64243	26.4597	16	278.067	3
Ctrl	309.333	613.333	1.74585	38.4556	9.66667	93.8056	6.66667		0.025 +0.025 mg/L Acylcarnitine Mix 2 +3	477	570	1.99758	52.7662	10.3333	59.4745	13.3333
Ctrl	164.333	659.667	1.43185	10.0527	16.3333	345.444	2.66667		0.025 +0.025 mg/L Acylcarnitine Mix 2 +3	391	541.667	1.87471	28.2265	14.3333	62.5727	13.3333
Ctrl	204.333	508.667	1.81773	9.55155	21.3333	54.7692	10		0.025 +0.025 mg/L Acylcarnitine Mix 2 +3	366.667	661	1.6421	23.0972	17.6667	118.107	6
Ctrl	285	527.333	1.43435	14.1067	21.3333	27.9422	20		0.025 +0.025 mg/L Acylcarnitine Mix 2 +3	439.333	617.333	1.98595	39.144	14.3333	279.567	4.66667
Ctrl	84.3333	651	1.53139	5.3976	14.6667	133.456	6		0.025 +0.025 mg/L Acylcarnitine Mix 2 +3	326	622	1.70106	28.8708	12	156.083	4.33333
Ctrl	64	583.333	1.71657	6.23434	10.3333	92.25	11.6667		0.025 +0.025 mg/L Acylcarnitine Mix 2 +3	297	696.667	1.47015	17.4971	17.3333	271.333	2.66667
Ctrl	223.667	643	1.70675	12.2013	19	90.3864	8		0.025 +0.025 mg/L Acylcarnitine Mix 2 +3	473.333	644.333	1.81098	66.4683	7.33333	286.722	2.33333
Ctrl	410	604	2.08575	40.1323	10.6667	124.167	6		0.025 +0.025 mg/L Acylcarnitine Mix 2 +3	440.667	627.667	1.82747	123.233	5	244.667	2.66667
Ctrl	364.667	508	1.77929	23.572	15.6667	80.4286	6.33333		0.025 +0.025 mg/L Acylcarnitine Mix 2 +3	472	616.667	1.88059	60.2146	8.33333	248.333	3
Ctrl	214.333	537	1.87562	15.3807	14.3333	122.187	9.33333		0.025 +0.025 mg/L Acylcarnitine Mix 2 +3	476.333	668.333	1.70866	67.4199	9.66667	371	2.33333
Ctrl	444.667	680.667	1.92637	50.4167	10	265.833	2.66667		0.05 +0.05 mg/L Acylcarnitine Mix 2 +3	413.333	532.667	1.8909	40.2962	12	69.5236	9
Ctrl	362.333	610	1.71256	30.4447	13.3333	85.098	10.3333		0.05 +0.05 mg/L Acylcarnitine Mix 2 +3	308.667	597.333	2.25902	23.8064	13.6667	113.778	7.66667
Ctrl	382.333	620	2.13427	52.8302	7.66667	172.306	3.66667		0.05 +0.05 mg/L Acylcarnitine Mix 2 +3	400	605.667	1.80529	19.5754	23	158.044	4
Ctrl	74.3333	635.333	1.65517	4.65142	14.3333	95.9167	7		0.05 +0.05 mg/L Acylcarnitine Mix 2 +3	311.667	535.333	1.6543	25.8063	13.6667	50.2242	10.6667
Ctrl	277	666.333	2.51087	23.1115	13	213.367	3.66667		0.05 +0.05 mg/L Acylcarnitine Mix 2 +3	467.333	603	2.14853	35.7114	14.6667	282.222	5.66667
Ctrl	341.333	621	1.68723	23.1568	15.6667	169.032	4.33333		0.05 +0.05 mg/L Acylcarnitine Mix 2 +3	321.667	607	1.5082	17.4049	18.6667	232.905	3.66667
Ctrl	248.667	615	1.7424	16.332	15.3333	144.583	5.33333		0.05 +0.05 mg/L Acylcarnitine Mix 2 +3	317.667	520	1.33494	19.875	17.3333	37.5105	15
Ctrl	365	631.667	2.10862	25.3778	15	136.983	4.66667		0.05 +0.05 mg/L Acylcarnitine Mix 2 +3	327.333	643.667	1.52267	19.8777	17.3333	234.167	3
Ctrl	336.667	606	1.40015	29.1829	12.3333	130.679	5		0.05 +0.05 mg/L Acylcarnitine Mix 2 +3	404.667	654	1.78359	30.6485	15.3333	310.321	4
Ctrl	480.333	635.333	1.44465	58.5027	8.66667	186.542	4.66667		0.05 +0.05 mg/L Acylcarnitine Mix 2 +3	426.667	639	1.92512	36.6773	12.3333	106.493	7
Ctrl	252.333	542.667	1.76905	21.865	12.3333	112.243	9		0.05 +0.05 mg/L Acylcarnitine Mix 2 +3	382	634.333	1.70219	31.5	15.3333	203.083	3.66667
Ctrl	416.667	597	1.74483	39.3687	13	83.5795	8		0.05 +0.05 mg/L Acylcarnitine Mix 2 +3	388.333	614	1.78473	22.5899	17.6667	137.485	8
Ctrl	462.667	624	2.37749	60.7857	7.66667	102.45	6.33333		0.05 +0.05 mg/L Acylcarnitine Mix 2 +3	397	628.333	1.80752	30.8033	13.3333	153.622	4.33333
Ctrl	247	640.333	1.48531	13.3506	19.3333	113.474	7.66667		0.05 +0.05 mg/L Acylcarnitine Mix 2 +3	353.667	623.667	1.54489	15.3768	23	135.738	5.33333
Ctrl	453.667	649	2.10685	57.5833	8	214.667	3.33333		0.05 +0.05 mg/L Acylcarnitine Mix 2 +3	301.667	600.667	1.43442	13.6854	24.3333	80.2	8.33333
Ctrl	455.667	674	1.53904	43.4567	11	559.5	1.33333		0.05 +0.05 mg/L Acylcarnitine Mix 2 +3	388.333	590.333	2.18522	29.0865	13.6667	97.2303	7
Ctrl	269.333	633.667	1.56002	12.388	23.3333	67.7893	10		0.05 +0.05 mg/L Acylcarnitine Mix 2 +3	397	498.667	1.63426	37.5111	10.6667	69.4089	9.33333
Ctrl	280.667	547	1.53154	15.6393	18.3333	44.9	19.3333		0.05 +0.05 mg/L Acylcarnitine Mix 2 +3	244.333	498	1.77836	15.7615	16	94.1052	8.33333
Ctrl	326.333	585.333	2.27783	23.9214	14	99.3823	6.66667		0.05 +0.05 mg/L Acylcarnitine Mix 2 +3	396.667	599.333	2.08996	42.0135	9.66667	189.028	4
Ctrl	273.333	597.333	1.58121	24.2949	15.3333	111.302	5.66667		0.05 +0.05 mg/L Acylcarnitine Mix 2 +3	339.333	673	1.70429	25.2404	13.6667	213.517	3.66667
Ctrl	394	604.333	2.50595	38.1944	10.6667	134.072	5.33333		0.05 +0.05 mg/L Acylcarnitine Mix 2 +3	278.333	592.667	2.36951	14.454	19.6667	100.46	6
Ctrl	467.333	630	2.12944	53.5556	9.66667	226.972	3		0.05 +0.05 mg/L Acylcarnitine Mix 2 +3	269	565	2.32562	20.5442	15.3333	59.1212	9.66667
Ctrl	470.333	617.333	1.60152	28.7917	18	191.538	6		0.05 +0.05 mg/L Acylcarnitine Mix 2 +3	301.333	578.333	2.00765	22.8467	15.3333	80.7333	8
Ctrl	250.667	554	1.96818	12.3163	21	48.1903	12		0.05 +0.05 mg/L Acylcarnitine Mix 2 +3	416	619	1.50727	22.1702	19	75.6167	9.66667
Ctrl	334.667	421.667	2.01689	37.0298	12	93.1296	8.33333		0.05 +0.05 mg/L Acylcarnitine Mix 2 +3	430	612.667	1.67851	38.0546	13.3333	97.4741	6.66667
Ctrl	431.667	615.333	2.26311	28.3197	17.3333	170.889	4		0.05 +0.05 mg/L Acylcarnitine Mix 2 +3	277.667	607.667	1.85065	19.6106	16.6667	110.297	6.66667
Ctrl	350.333	683.667	1.98219	22.2339	16	285.5	2.66667		0.05 +0.05 mg/L Acylcarnitine Mix 2 +3	445.667	544.667	1.61409	64.5333	8.66667	91.8386	6.66667
Ctrl	325.333	550.333	1.35479	13.6139	25	49.2467	14.6667		0.05 +0.05 mg/L Acylcarnitine Mix 2 +3	435	645	1.22473	20.574	21.3333	102.254	6.33333
Ctrl	465	642.667	1.37509	36.0305	13.6667	316.167	3.33333		0.05 +0.05 mg/L Acylcarnitine Mix 2 +3	332	628.333	1.58251	21.84	15.6667	352.556	2.33333
Ctrl	390.667	644.333	2.28715	26.0823	16.3333	211.849	4		0.05 +0.05 mg/L Acylcarnitine Mix 2 +3	433	659	2.424	53.5647	12	440.5	1.66667
Ctrl	152	654	2.02663	7.16881	21.3333	177.4	5.66667		0.05 +0.05 mg/L Acylcarnitine Mix 2 +3	361.667	590	2.28062	26.2402	16.6667	155.667	5.66667
Ctrl	480.667	673	1.88772	53.6126	9.33333	393.5	2.33333
