# Supplementary material for: Modulation of sleep by trafficking of lipids through the Drosophila blood-brain barrier
Source: eLife. 2023 May 4;12:e86336. doi: 10.7554/eLife.86336 (PMC10205086; doi:10.7554/eLife.86336)
Supplement: Figure 8—figure supplement 2—source data 1. [file elife-86336-fig8-figsupp2-data1.xlsx]

## Sheet: Sheet1
	rDS	rNS	AI	rD aLSE	rD aNSE	rN aLSE	rN aNSE			rDS	rNS	AI	rD aLSE	rD aNSE	rN aLSE	rN aNSE
Ctrl	335.333	634.333	1.86923	29.8923	13.6667	148.133	4.33333		0.1 +0.1 mg/L Acylcarnitine Mix 2 +3	455.667	610.667	2.4816	53.7727	9.33333	142.7	4.33333
Ctrl	378.667	634	2.12691	69.8286	5.66667	358.444	2.33333		0.1 +0.1 mg/L Acylcarnitine Mix 2 +3	490.667	595	1.55179	38.9568	16	90.5556	7.66667
Ctrl	460	663	2.0347	57.5	8	221	3		0.1 +0.1 mg/L Acylcarnitine Mix 2 +3	409.667	575	1.72901	71.6333	6	89.5032	11
Ctrl	444.333	587	1.52635	28.5673	19	52.5149	11.3333		0.1 +0.1 mg/L Acylcarnitine Mix 2 +3	384.333	548.333	2.21569	58.7016	7	186.75	3.33333
Ctrl	404.667	685.667	1.83332	38.2639	13	460	1.66667		0.1 +0.1 mg/L Acylcarnitine Mix 2 +3	357.667	646	1.95759	26.0699	15	127.278	6.66667
Ctrl	510.667	589.667	1.54779	73.2833	8	333.667	2.33333		0.1 +0.1 mg/L Acylcarnitine Mix 2 +3	412	597.333	2.13213	104.952	7.33333	184.361	4
Ctrl	378.667	629.667	1.72611	39.2046	11.6667	176.167	3.66667		0.1 +0.1 mg/L Acylcarnitine Mix 2 +3	491.667	622	2.05281	46.3878	11	106.237	6.33333
Ctrl	411.333	606.667	1.94393	33.1875	14.6667	96.0317	6.33333		0.1 +0.1 mg/L Acylcarnitine Mix 2 +3	463.667	603	1.94682	79.3286	6	130.25	5
Ctrl	480.333	634.333	2.20594	104.883	4.66667	283	2.33333		0.1 +0.1 mg/L Acylcarnitine Mix 2 +3	497.667	613.667	1.79774	56.1759	9.33333	64.6636	9.66667
Ctrl	396.667	673.667	2.06774	54.437	8	326.639	3.66667		0.1 +0.1 mg/L Acylcarnitine Mix 2 +3	500	665	2.04372	62.1869	8.66667	407.167	2
Ctrl	358	660.333	1.54334	30.9683	12.3333	274.667	2.66667		0.1 +0.1 mg/L Acylcarnitine Mix 2 +3	517	628.667	2.53964	105.917	5	335.639	2.66667
Ctrl	451	614.333	1.86446	67.3194	8.33333	157.8	5.33333		0.1 +0.1 mg/L Acylcarnitine Mix 2 +3	492.333	586.667	2.21254	82.6772	6.66667	80.2679	7.33333
Ctrl	434.667	591	1.6479	97.265	6.66667	82.8439	7.33333		0.1 +0.1 mg/L Acylcarnitine Mix 2 +3	463	665	1.90478	64.8704	7.33333	665	1
Ctrl	235	650	1.1573	15.3474	18	157.726	4.66667		0.1 +0.1 mg/L Acylcarnitine Mix 2 +3	454.333	569.333	2.06357	48.9476	10	132.667	4.33333
Ctrl	469.667	637	1.7711	72.5389	7.66667	373.333	2.33333		0.1 +0.1 mg/L Acylcarnitine Mix 2 +3	479.667	610.333	2.25973	52.0167	9.33333	187.917	4
Ctrl	308.333	676	1.85985	31.2298	10.3333	282.167	2.66667		0.1 +0.1 mg/L Acylcarnitine Mix 2 +3	359	646	1.5853	26.3317	13.6667	96.246	8.33333
Ctrl	469.667	624	2.17775	78.5185	7	173.444	3.66667		0.1 +0.1 mg/L Acylcarnitine Mix 2 +3	450	587.333	2.534	84.8611	5.66667	165.071	4.66667
Ctrl	526.667	655	2.1471	91.2798	6.33333	102.261	6.66667		0.1 +0.1 mg/L Acylcarnitine Mix 2 +3	451.333	597	1.8941	57.0852	8.33333	65.4381	9.66667
Ctrl	291	549.333	1.98007	56.0093	8	130.75	5		0.1 +0.1 mg/L Acylcarnitine Mix 2 +3	493	507	1.6079	72.0204	7.33333	84.9755	14.6667
Ctrl	401.333	602.333	1.63664	32.2712	13	100.542	6.66667		0.1 +0.1 mg/L Acylcarnitine Mix 2 +3	450.667	542.333	2.18815	71.256	6.66667	98.4095	5.66667
Ctrl	399	642	1.94361	44.338	9.33333	167.561	4		0.1 +0.1 mg/L Acylcarnitine Mix 2 +3	468	588.333	1.65734	80.4111	6.66667	142.23	4.66667
Ctrl	296	665	1.82138	25.1905	13	240.778	3		0.1 +0.1 mg/L Acylcarnitine Mix 2 +3	531	666.333	1.83852	67.4254	9.33333	446.333	1.66667
Ctrl	202.333	637.667	1.77295	15.7108	14.3333	149.991	5.33333		0.1 +0.1 mg/L Acylcarnitine Mix 2 +3	538.333	657.667	2.54094	94.7722	6.66667	386.75	2.33333
Ctrl	463.333	562	2.21561	62.1528	9.33333	156	3.66667		0.1 +0.1 mg/L Acylcarnitine Mix 2 +3	475.667	564.333	2.00674	102.367	4.66667	109.878	9.66667
Ctrl	376.667	611	2.11247	80.2857	5.66667	238.056	2.66667		0.1 +0.1 mg/L Acylcarnitine Mix 2 +3	503.667	660.333	2.3479	91.9167	6	330.167	2
Ctrl	520.667	627	1.72163	75.8056	7.33333	383.5	2		0.1 +0.1 mg/L Acylcarnitine Mix 2 +3	531.333	621.667	2.18911	98.0136	6.66667	302.833	3.33333
Ctrl	366.667	570.333	2.38594	37.1282	11.3333	87.3492	10.3333		0.1 +0.1 mg/L Acylcarnitine Mix 2 +3	471.333	621.667	2.89721	144.583	4	225.889	3
Ctrl	528	628	2.08637	99.8944	6	135.96	5.33333		0.1 +0.1 mg/L Acylcarnitine Mix 2 +3	524.667	633	2.61136	104.293	5.33333	330.244	3
Ctrl	469.667	629.667	1.31657	30.7262	15.3333	164.5	4		0.1 +0.1 mg/L Acylcarnitine Mix 2 +3	437.333	536.333	2.21598	62.5	8	77.9677	11
Ctrl	369.667	660.333	1.84399	41.9028	10.6667	221.333	3.33333		0.1 +0.1 mg/L Acylcarnitine Mix 2 +3	358	593.667	2.11788	48.1151	9	108.194	6
Ctrl	406.333	644.333	1.67313	52.0736	8.33333	644.333	1		0.1 +0.1 mg/L Acylcarnitine Mix 2 +3	477.333	502	2.18738	51.9762	10	64.6185	8.33333
Ctrl	449.667	540.667	2.38602	62.3667	10.3333	154.833	5.33333		0.25 +0.25 mg/L Acylcarnitine Mix 2 +3	284.667	569.333	1.50444	15.9232	18	86.0079	6.66667
Ctrl	355.667	653.333	1.65139	21.2137	17	203.111	5.66667		0.25 +0.25 mg/L Acylcarnitine Mix 2 +3	418.667	617.333	1.80196	41.381	11.6667	186.667	4
Ctrl	467.333	657.667	2.13624	92.8333	6	511.667	1.66667		0.25 +0.25 mg/L Acylcarnitine Mix 2 +3	335.333	600.667	2.16199	23.013	14.6667	101.983	6
Ctrl	466.667	554.333	2.24583	59.129	8	83.6905	6.66667		0.25 +0.25 mg/L Acylcarnitine Mix 2 +3	464.333	617	2.77931	92.0694	6.33333	129.667	5.33333
Ctrl	346.333	573.333	2.13576	28.9308	13.6667	150.833	4		0.25 +0.25 mg/L Acylcarnitine Mix 2 +3	287.333	591	1.80385	24.5242	13.3333	54.3164	11.6667
Ctrl	420.667	656	1.61291	29.2692	14.6667	492.917	2		0.25 +0.25 mg/L Acylcarnitine Mix 2 +3	452.333	659.333	2.0777	89.709	6.33333	342.178	3
Ctrl	384.333	597.333	1.71423	44.7528	9	86.871	7		0.25 +0.25 mg/L Acylcarnitine Mix 2 +3	494	638.333	2.46432	143.844	4.33333	174.167	5
Ctrl	356.333	628.667	2.08913	36.7583	10	101.657	6.33333		0.25 +0.25 mg/L Acylcarnitine Mix 2 +3	340	630.667	2.13602	37.5278	9.33333	193	3.33333
Ctrl	435.333	586.333	1.74251	48.0961	9.66667	117.152	5.33333		0.25 +0.25 mg/L Acylcarnitine Mix 2 +3	428.667	609	1.91537	42.1667	10.6667	154.167	7.66667
Ctrl	422.333	647.667	2.20597	69.6278	6.33333	400.111	2		0.25 +0.25 mg/L Acylcarnitine Mix 2 +3	427	619.667	1.99787	41.6251	14.6667	123.933	5
Ctrl	263.667	586	2.28821	14.481	20.6667	56.1405	12.3333		0.25 +0.25 mg/L Acylcarnitine Mix 2 +3	314.333	588.667	1.67949	28.55	11.3333	130.944	5
Ctrl	435	588.333	2.77688	59.8143	9	228.944	2.66667		0.25 +0.25 mg/L Acylcarnitine Mix 2 +3	428.667	649.333	1.9896	32.1783	14	271.5	2.66667
Ctrl	461	646.667	1.94875	47.8615	10	234.333	3		0.25 +0.25 mg/L Acylcarnitine Mix 2 +3	383.667	636.333	1.71785	41.4172	11.6667	312.167	3.33333
Ctrl	427	633.667	1.34848	53.2179	8.33333	200.75	3.66667		0.25 +0.25 mg/L Acylcarnitine Mix 2 +3	381	597.333	2.53442	78.4	6	104.817	6
Ctrl	421.333	634.667	1.97021	121.107	10.6667	84.1587	7.66667		0.25 +0.25 mg/L Acylcarnitine Mix 2 +3	527.667	615.667	2.58074	179.4	3.33333	212.567	3.33333
Ctrl	298	560.333	2.15802	40.8583	8	72.5159	9		0.25 +0.25 mg/L Acylcarnitine Mix 2 +3	388.667	637	1.80898	27.7087	14.3333	137.5	5
Ctrl	330.667	621.667	1.70889	31.4175	10.6667	112.812	6.66667		0.25 +0.25 mg/L Acylcarnitine Mix 2 +3	454	659	1.19369	50.0084	9.33333	263.2	3
Ctrl	413	564.667	1.75844	43.5538	9.66667	148.981	10		0.25 +0.25 mg/L Acylcarnitine Mix 2 +3	415.667	667	2.08616	28.6788	15	185.167	3.66667
Ctrl	248	581	1.45634	26.625	11.3333	102.817	6.66667		0.25 +0.25 mg/L Acylcarnitine Mix 2 +3	486	642	1.99982	73.375	7	131.756	5
Ctrl	434.333	612.667	1.73958	55.471	8.33333	114.891	10.3333		0.25 +0.25 mg/L Acylcarnitine Mix 2 +3	444	676.667	2.08558	32.3191	14.3333	195.089	4.33333
Ctrl	514.333	586.667	1.77985	72.1583	7.66667	288.933	6.33333		0.25 +0.25 mg/L Acylcarnitine Mix 2 +3	354.333	657.667	1.67932	31.0069	12.3333	128.139	5.33333
Ctrl	304.333	645.333	1.50122	18.9798	17	153.694	5		0.25 +0.25 mg/L Acylcarnitine Mix 2 +3	274.333	618.667	2.15807	16.7427	18.6667	188.639	3.33333
Ctrl	264	596.667	2.0138	17.504	16.3333	77.1402	9		0.25 +0.25 mg/L Acylcarnitine Mix 2 +3	457.667	660	1.68763	140.139	3.33333	183.583	3.66667
Ctrl	226.333	606	1.7213	17.2659	13.3333	58.5633	11		0.25 +0.25 mg/L Acylcarnitine Mix 2 +3	541.333	600.667	1.69313	63.0917	8.66667	133.497	5.33333
Ctrl	109	580.333	1.30665	15.571	8.33333	90.5476	13		0.25 +0.25 mg/L Acylcarnitine Mix 2 +3	534.333	644.667	2.20419	84.2008	7.66667	380.583	2.33333
Ctrl	208	565.333	1.7467	24.381	8.33333	154.286	5.66667		0.25 +0.25 mg/L Acylcarnitine Mix 2 +3	491.667	635.667	1.82891	82.9802	6.66667	374.25	2.33333
Ctrl	396.333	647	2.04493	63.7454	10	178.158	5		0.25 +0.25 mg/L Acylcarnitine Mix 2 +3	417	642.667	1.75969	31.3462	13.3333	369.1	2.66667
Ctrl	439.667	640.333	1.9509	84.9259	7	142.139	4.66667		0.25 +0.25 mg/L Acylcarnitine Mix 2 +3	393	645.667	2.13407	58.2693	7.66667	180.782	9
Ctrl	421.667	600.333	1.97497	31.0204	14	98.7306	6.33333		0.25 +0.25 mg/L Acylcarnitine Mix 2 +3	414.333	650	1.77718	33.6325	12.3333	214.071	4
Ctrl	191	682	1.6903	11.3806	18.3333	227.333	3		0.25 +0.25 mg/L Acylcarnitine Mix 2 +3	465	587.333	2.16132	61.0179	7.66667	97.9524	8
Ctrl	341.333	636.333	2.08244	31.5714	11.3333	533.833	1.33333		0.25 +0.25 mg/L Acylcarnitine Mix 2 +3	431	597	2.28999	70.913	11	130.353	11
Ctrl	239	620.667	1.37725	18.0851	14.6667	90.8452	9.33333		0.25 +0.25 mg/L Acylcarnitine Mix 2 +3	400	656	2.3268	33.0114	12.3333	292.767	5.33333
Ctrl	392.333	562.333	1.53675	30.7347	13.3333	82.4111	7.33333		0.5 +0.5 mg/L Acylcarnitine Mix 2 +3	455.667	631	2.49816	57.6534	8	243.833	3.66667
Ctrl	490.667	646	1.83797	45.8911	11.6667	646	1		0.5 +0.5 mg/L Acylcarnitine Mix 2 +3	405.333	529.333	1.8162	51.6929	9.33333	53.2067	15
Ctrl	396.667	615.667	2.15286	37.3515	10.6667	171.111	4		0.5 +0.5 mg/L Acylcarnitine Mix 2 +3	478.667	679	2.16784	75.1889	7	413.833	2
Ctrl	373.333	584.333	1.71148	31.8413	13.3333	102	6.33333		0.5 +0.5 mg/L Acylcarnitine Mix 2 +3	477	582.667	2.76494	94.8095	6.33333	177.226	4.33333
Ctrl	573.667	626	2.21596	86.9153	7	200.817	3.66667		0.5 +0.5 mg/L Acylcarnitine Mix 2 +3	300.333	577	1.87032	23.8921	13.6667	75.6508	8.33333
Ctrl	444.333	612	1.68746	35.1282	12.6667	167.138	6.66667		0.5 +0.5 mg/L Acylcarnitine Mix 2 +3	393.667	644.667	1.86023	42.2778	9.33333	270.5	2.66667
Ctrl	503.333	631.667	1.62547	44.4697	11.3333	167.708	4.66667		0.5 +0.5 mg/L Acylcarnitine Mix 2 +3	479.667	609	2.04523	69.447	9	441.583	3.33333
Ctrl	443	564.667	2.08917	82.25	6.33333	131.85	4.33333		0.5 +0.5 mg/L Acylcarnitine Mix 2 +3	478	582.333	2.06264	144.3	4	247.276	10.6667
Ctrl	537.333	632.333	1.46961	54.3724	10.3333	150.861	5		0.5 +0.5 mg/L Acylcarnitine Mix 2 +3	446	642	1.83866	46.816	10	221.256	3.33333
Ctrl	545	621.333	1.68344	96.9643	6	134.143	5.33333		0.5 +0.5 mg/L Acylcarnitine Mix 2 +3	457.667	647.667	2.8405	110.143	7	217	3.66667
Ctrl	456.333	657	1.62342	49.9697	9.66667	292.333	2.33333		0.5 +0.5 mg/L Acylcarnitine Mix 2 +3	423.667	671.333	1.52516	75.2639	6	176.506	4
Ctrl	506.333	485.667	1.86533	131.381	5.33333	57.2897	9		0.5 +0.5 mg/L Acylcarnitine Mix 2 +3	430.333	605	1.09319	41.8788	10.3333	138.587	5
Ctrl	443	585	1.56311	57.1308	9.33333	163.361	3.66667		0.5 +0.5 mg/L Acylcarnitine Mix 2 +3	416	587	2.0944	42.8132	11	59.3121	10
Ctrl	406.333	518	2.44913	57.0529	7.33333	50.5037	11.3333		0.5 +0.5 mg/L Acylcarnitine Mix 2 +3	371	620.667	2.04312	28.2822	14.3333	112.028	6
Ctrl	501.333	632.333	1.6762	59.0392	8.66667	230.167	3		0.5 +0.5 mg/L Acylcarnitine Mix 2 +3	430	605	2.5447	59.3492	8.66667	292.139	3.66667
Ctrl	238.667	588.333	2.3624	24.6932	10.3333	107.431	6		0.5 +0.5 mg/L Acylcarnitine Mix 2 +3	511	606	2.18481	95.2444	6	168.722	3.66667
Ctrl	417	605.333	1.33316	39.7942	11	99.5056	6.33333		0.5 +0.5 mg/L Acylcarnitine Mix 2 +3	198.667	451.333	1.30676	11.4699	18	22.1138	20.6667
Ctrl	346.333	550	1.60622	37.4028	9.66667	120.653	7.66667		0.5 +0.5 mg/L Acylcarnitine Mix 2 +3	513.333	630.667	1.79699	59.2731	8.66667	169.976	5.33333
Ctrl	512.667	675.667	2.54599	143.444	3.66667	504.556	2.66667		0.5 +0.5 mg/L Acylcarnitine Mix 2 +3	430.667	633.667	1.77244	59.1583	8.33333	237.63	4.33333
Ctrl	298	625.333	1.68585	20.5976	15.3333	171.87	5.33333		0.5 +0.5 mg/L Acylcarnitine Mix 2 +3	474.333	602	1.70886	51.7722	11	134.556	5
Ctrl	320.667	587	1.59769	40.2738	8.66667	175.393	4.33333		0.5 +0.5 mg/L Acylcarnitine Mix 2 +3	416.667	661.333	2.17029	51.5071	8.33333	144.469	5.33333
Ctrl	426.667	653.333	2.34071	52.5444	10.6667	386.833	2.33333		0.5 +0.5 mg/L Acylcarnitine Mix 2 +3	443.667	633.667	2.22133	72.5833	7.66667	170.238	5
Ctrl	492	613	1.64664	41.1067	13.3333	173.056	4.66667		0.5 +0.5 mg/L Acylcarnitine Mix 2 +3	436.333	610	1.87436	44.024	10.3333	105.917	8.33333
Ctrl	580.667	601.667	1.62402	185.467	3.66667	154.506	5.66667		0.5 +0.5 mg/L Acylcarnitine Mix 2 +3	470.333	601.333	1.89525	100.037	6	174.311	3.66667
Ctrl	448.667	622.333	1.48806	37.4631	12	105.273	9.66667		0.5 +0.5 mg/L Acylcarnitine Mix 2 +3	445.667	617.667	2.49912	73.4444	6.33333	121.969	5.33333
Ctrl	398.667	652.333	1.48034	24.7997	16.3333	93.225	7.66667		0.5 +0.5 mg/L Acylcarnitine Mix 2 +3	331.667	554	1.62704	27.037	14	70.125	8.66667
Ctrl	447.667	597	1.89082	72.7326	8	88.4259	7		0.5 +0.5 mg/L Acylcarnitine Mix 2 +3	286.333	583	1.68459	29.2841	10.3333	58.0056	11
Ctrl	353.667	615	1.8492	20.7884	17.3333	152.659	7		0.5 +0.5 mg/L Acylcarnitine Mix 2 +3	522.333	663.333	2.0855	82.5667	6.66667	196.011	4.33333
Ctrl	395	584.333	1.53629	42.0023	9.66667	113.464	8.66667		0.5 +0.5 mg/L Acylcarnitine Mix 2 +3	330	534.333	1.96841	31.2016	11	54.5115	12
Ctrl	338.333	600.333	1.84593	25.3723	14	65.5307	9.33333		0.5 +0.5 mg/L Acylcarnitine Mix 2 +3	429	625	1.86217	40.9444	10.6667	323.389	3.33333
Ctrl	431.333	580.667	1.93383	30.4465	14.3333	98.6206	6		0.5 +0.5 mg/L Acylcarnitine Mix 2 +3	396.667	561.333	1.44407	18.1151	22	44.9891	15
Ctrl	468.667	605.667	1.73854	41.8889	11.6667	78.381	8		0.5 +0.5 mg/L Acylcarnitine Mix 2 +3	331.333	560.667	1.68481	16.2841	20.3333	71.8481	8.33333
