# Supplementary material for: Modulation of sleep by trafficking of lipids through the Drosophila blood-brain barrier
Source: eLife. 2023 May 4;12:e86336. doi: 10.7554/eLife.86336 (PMC10205086; doi:10.7554/eLife.86336)
Supplement: Figure 8—source data 1. [file elife-86336-fig8-data1.xlsx]

## Sheet: Sheet1
Treatment	Total Sleep		Treatment	Total sleep
Ctrl	901.667		Acylcarnintine Mix (2 0.0125mg/L+3 0.0125mg/L)	699.333
Ctrl	880.667		Acylcarnintine Mix (2 0.0125mg/L+3 0.0125mg/L)	846
Ctrl	893.333		Acylcarnintine Mix (2 0.0125mg/L+3 0.0125mg/L)	1016.33
Ctrl	823.667		Acylcarnintine Mix (2 0.0125mg/L+3 0.0125mg/L)	921
Ctrl	984		Acylcarnintine Mix (2 0.0125mg/L+3 0.0125mg/L)	845
Ctrl	795.333		Acylcarnintine Mix (2 0.0125mg/L+3 0.0125mg/L)	1014
Ctrl	899.667		Acylcarnintine Mix (2 0.0125mg/L+3 0.0125mg/L)	915
Ctrl	699.667		Acylcarnintine Mix (2 0.0125mg/L+3 0.0125mg/L)	940.667
Ctrl	927.333		Acylcarnintine Mix (2 0.0125mg/L+3 0.0125mg/L)	1022
Ctrl	1025.33		Acylcarnintine Mix (2 0.0125mg/L+3 0.0125mg/L)	983
Ctrl	822.667		Acylcarnintine Mix (2 0.0125mg/L+3 0.0125mg/L)	1046.67
Ctrl	848.667		Acylcarnintine Mix (2 0.0125mg/L+3 0.0125mg/L)	777
Ctrl	800		Acylcarnintine Mix (2 0.0125mg/L+3 0.0125mg/L)	1019.67
Ctrl	733		Acylcarnintine Mix (2 0.0125mg/L+3 0.0125mg/L)	768.333
Ctrl	864.667		Acylcarnintine Mix (2 0.0125mg/L+3 0.0125mg/L)	1028.67
Ctrl	849.333		Acylcarnintine Mix (2 0.0125mg/L+3 0.0125mg/L)	776
Ctrl	706		Acylcarnintine Mix (2 0.0125mg/L+3 0.0125mg/L)	732.333
Ctrl	1065		Acylcarnintine Mix (2 0.0125mg/L+3 0.0125mg/L)	1110
Ctrl	798.333		Acylcarnintine Mix (2 0.0125mg/L+3 0.0125mg/L)	656
Ctrl	648.333		Acylcarnintine Mix (2 0.0125mg/L+3 0.0125mg/L)	967
Ctrl	691		Acylcarnintine Mix (2 0.0125mg/L+3 0.0125mg/L)	1017.33
Ctrl	710		Acylcarnintine Mix (2 0.0125mg/L+3 0.0125mg/L)	1057.67
Ctrl	1020.67		Acylcarnintine Mix (2 0.0125mg/L+3 0.0125mg/L)	934
Ctrl	813.667		Acylcarnintine Mix (2 0.0125mg/L+3 0.0125mg/L)	1070
Ctrl	823.333		Acylcarnintine Mix (2 0.0125mg/L+3 0.0125mg/L)	1121.33
Ctrl	934		Acylcarnintine Mix (2 0.0125mg/L+3 0.0125mg/L)	785.333
Ctrl	907.667		Acylcarnintine Mix (2 0.0125mg/L+3 0.0125mg/L)	773
Ctrl	751.333		Acylcarnintine Mix (2 0.0125mg/L+3 0.0125mg/L)	1005.67
Ctrl	875.667		Acylcarnintine Mix (2 0.0125mg/L+3 0.0125mg/L)	1017.33
Ctrl	913.333		Acylcarnintine Mix (2 0.0125mg/L+3 0.0125mg/L)	872.333
Ctrl	976.667		Acylcarnintine Mix (2 0.0125mg/L+3 0.0125mg/L)	1188
Ctrl	749		Acylcarnintine Mix (2 0.0125mg/L+3 0.0125mg/L)	1021.67
Ctrl	1063		Acylcarnintine Mix (2 0.025mg/L+3 0.025mg/L)	1017
Ctrl	930		Acylcarnintine Mix (2 0.025mg/L+3 0.025mg/L)	909
Ctrl	870.333		Acylcarnintine Mix (2 0.025mg/L+3 0.025mg/L)	878.333
Ctrl	984.667		Acylcarnintine Mix (2 0.025mg/L+3 0.025mg/L)	859
Ctrl	805		Acylcarnintine Mix (2 0.025mg/L+3 0.025mg/L)	812
Ctrl	946		Acylcarnintine Mix (2 0.025mg/L+3 0.025mg/L)	1109.67
Ctrl	885.667		Acylcarnintine Mix (2 0.025mg/L+3 0.025mg/L)	956.667
Ctrl	1003.67		Acylcarnintine Mix (2 0.025mg/L+3 0.025mg/L)	1053.67
Ctrl	991.667		Acylcarnintine Mix (2 0.025mg/L+3 0.025mg/L)	1132.33
Ctrl	1024.33		Acylcarnintine Mix (2 0.025mg/L+3 0.025mg/L)	798.333
Ctrl	899		Acylcarnintine Mix (2 0.025mg/L+3 0.025mg/L)	985.333
Ctrl	915.667		Acylcarnintine Mix (2 0.025mg/L+3 0.025mg/L)	1223.67
Ctrl	852		Acylcarnintine Mix (2 0.025mg/L+3 0.025mg/L)	966.667
Ctrl	913.333		Acylcarnintine Mix (2 0.025mg/L+3 0.025mg/L)	991
Ctrl	915.667		Acylcarnintine Mix (2 0.025mg/L+3 0.025mg/L)	1074.33
Ctrl	1129.67		Acylcarnintine Mix (2 0.025mg/L+3 0.025mg/L)	992
Ctrl	975		Acylcarnintine Mix (2 0.025mg/L+3 0.025mg/L)	1091
Ctrl	710		Acylcarnintine Mix (2 0.025mg/L+3 0.025mg/L)	1084.33
Ctrl	957.667		Acylcarnintine Mix (2 0.025mg/L+3 0.025mg/L)	1086.33
Ctrl	911		Acylcarnintine Mix (2 0.025mg/L+3 0.025mg/L)	1108
Ctrl	910.667		Acylcarnintine Mix (2 0.025mg/L+3 0.025mg/L)	1074
Ctrl	974.667		Acylcarnintine Mix (2 0.025mg/L+3 0.025mg/L)	1100.33
Ctrl	922.667		Acylcarnintine Mix (2 0.025mg/L+3 0.025mg/L)	1047
Ctrl	824		Acylcarnintine Mix (2 0.025mg/L+3 0.025mg/L)	932.667
Ctrl	713		Acylcarnintine Mix (2 0.025mg/L+3 0.025mg/L)	1027.67
Ctrl	812.333		Acylcarnintine Mix (2 0.025mg/L+3 0.025mg/L)	1056.67
Ctrl	735.333		Acylcarnintine Mix (2 0.025mg/L+3 0.025mg/L)	948
Ctrl	647.333		Acylcarnintine Mix (2 0.025mg/L+3 0.025mg/L)	993.667
Ctrl	866.667		Acylcarnintine Mix (2 0.025mg/L+3 0.025mg/L)	1117.67
Ctrl	1014		Acylcarnintine Mix (2 0.025mg/L+3 0.025mg/L)	1068.33
Ctrl	872.667		Acylcarnintine Mix (2 0.025mg/L+3 0.025mg/L)	1088.67
Ctrl	751.333		Acylcarnintine Mix (2 0.025mg/L+3 0.025mg/L)	1144.67
Ctrl	1125.33		Acylcarnintine Mix (2 0.05mg/L+3 0.05mg/L)	946
Ctrl	972.333		Acylcarnintine Mix (2 0.05mg/L+3 0.05mg/L)	906
Ctrl	1002.33		Acylcarnintine Mix (2 0.05mg/L+3 0.05mg/L)	1005.67
Ctrl	709.667		Acylcarnintine Mix (2 0.05mg/L+3 0.05mg/L)	847
Ctrl	943.333		Acylcarnintine Mix (2 0.05mg/L+3 0.05mg/L)	1070.33
Ctrl	962.333		Acylcarnintine Mix (2 0.05mg/L+3 0.05mg/L)	928.667
Ctrl	863.667		Acylcarnintine Mix (2 0.05mg/L+3 0.05mg/L)	837.667
Ctrl	996.667		Acylcarnintine Mix (2 0.05mg/L+3 0.05mg/L)	971
Ctrl	942.667		Acylcarnintine Mix (2 0.05mg/L+3 0.05mg/L)	1058.67
Ctrl	1115.67		Acylcarnintine Mix (2 0.05mg/L+3 0.05mg/L)	1065.67
Ctrl	795		Acylcarnintine Mix (2 0.05mg/L+3 0.05mg/L)	1016.33
Ctrl	1013.67		Acylcarnintine Mix (2 0.05mg/L+3 0.05mg/L)	1002.33
Ctrl	1086.67		Acylcarnintine Mix (2 0.05mg/L+3 0.05mg/L)	1025.33
Ctrl	887.333		Acylcarnintine Mix (2 0.05mg/L+3 0.05mg/L)	977.333
Ctrl	1102.67		Acylcarnintine Mix (2 0.05mg/L+3 0.05mg/L)	902.333
Ctrl	1129.67		Acylcarnintine Mix (2 0.05mg/L+3 0.05mg/L)	978.667
Ctrl	903		Acylcarnintine Mix (2 0.05mg/L+3 0.05mg/L)	895.667
Ctrl	827.667		Acylcarnintine Mix (2 0.05mg/L+3 0.05mg/L)	742.333
Ctrl	911.667		Acylcarnintine Mix (2 0.05mg/L+3 0.05mg/L)	996
Ctrl	870.667		Acylcarnintine Mix (2 0.05mg/L+3 0.05mg/L)	1012.33
Ctrl	998.333		Acylcarnintine Mix (2 0.05mg/L+3 0.05mg/L)	871
Ctrl	1097.33		Acylcarnintine Mix (2 0.05mg/L+3 0.05mg/L)	834
Ctrl	1087.67		Acylcarnintine Mix (2 0.05mg/L+3 0.05mg/L)	879.667
Ctrl	804.667		Acylcarnintine Mix (2 0.05mg/L+3 0.05mg/L)	1035
Ctrl	756.333		Acylcarnintine Mix (2 0.05mg/L+3 0.05mg/L)	1042.67
Ctrl	1047		Acylcarnintine Mix (2 0.05mg/L+3 0.05mg/L)	885.333
Ctrl	1034		Acylcarnintine Mix (2 0.05mg/L+3 0.05mg/L)	990.333
Ctrl	875.667		Acylcarnintine Mix (2 0.05mg/L+3 0.05mg/L)	1080
Ctrl	1107.67		Acylcarnintine Mix (2 0.05mg/L+3 0.05mg/L)	960.333
Ctrl	1035		Acylcarnintine Mix (2 0.05mg/L+3 0.05mg/L)	1092
Ctrl	806		Acylcarnintine Mix (2 0.05mg/L+3 0.05mg/L)	951.667
Ctrl	1153.67
Ctrl	969.667		Acylcarnintine Mix (2 0.1mg/L+3 0.1mg/L)	1066.33
Ctrl	1012.67		Acylcarnintine Mix (2 0.1mg/L+3 0.1mg/L)	1085.67
Ctrl	1123		Acylcarnintine Mix (2 0.1mg/L+3 0.1mg/L)	984.667
Ctrl	1031.33		Acylcarnintine Mix (2 0.1mg/L+3 0.1mg/L)	932.667
Ctrl	1090.33		Acylcarnintine Mix (2 0.1mg/L+3 0.1mg/L)	1003.67
Ctrl	1100.33		Acylcarnintine Mix (2 0.1mg/L+3 0.1mg/L)	1009.33
Ctrl	1008.33		Acylcarnintine Mix (2 0.1mg/L+3 0.1mg/L)	1113.67
Ctrl	1018		Acylcarnintine Mix (2 0.1mg/L+3 0.1mg/L)	1066.67
Ctrl	1114.67		Acylcarnintine Mix (2 0.1mg/L+3 0.1mg/L)	1111.33
Ctrl	1070.33		Acylcarnintine Mix (2 0.1mg/L+3 0.1mg/L)	1165
Ctrl	1018.33		Acylcarnintine Mix (2 0.1mg/L+3 0.1mg/L)	1145.67
Ctrl	1065.33		Acylcarnintine Mix (2 0.1mg/L+3 0.1mg/L)	1079
Ctrl	1025.67		Acylcarnintine Mix (2 0.1mg/L+3 0.1mg/L)	1128
Ctrl	885		Acylcarnintine Mix (2 0.1mg/L+3 0.1mg/L)	1023.67
Ctrl	1106.67		Acylcarnintine Mix (2 0.1mg/L+3 0.1mg/L)	1090
Ctrl	984.333		Acylcarnintine Mix (2 0.1mg/L+3 0.1mg/L)	1005
Ctrl	1093.67		Acylcarnintine Mix (2 0.1mg/L+3 0.1mg/L)	1037.33
Ctrl	1181.67		Acylcarnintine Mix (2 0.1mg/L+3 0.1mg/L)	1048.33
Ctrl	840.333		Acylcarnintine Mix (2 0.1mg/L+3 0.1mg/L)	1000
Ctrl	1003.67		Acylcarnintine Mix (2 0.1mg/L+3 0.1mg/L)	993
Ctrl	1041		Acylcarnintine Mix (2 0.1mg/L+3 0.1mg/L)	1056.33
Ctrl	961		Acylcarnintine Mix (2 0.1mg/L+3 0.1mg/L)
Ctrl	840		Acylcarnintine Mix (2 0.1mg/L+3 0.1mg/L)	1197.33
Ctrl	1025.33		Acylcarnintine Mix (2 0.1mg/L+3 0.1mg/L)	1196
Ctrl	987.667		Acylcarnintine Mix (2 0.1mg/L+3 0.1mg/L)	1040
Ctrl	1147.67		Acylcarnintine Mix (2 0.1mg/L+3 0.1mg/L)	1164
Ctrl	937		Acylcarnintine Mix (2 0.1mg/L+3 0.1mg/L)	1153
Ctrl	1156		Acylcarnintine Mix (2 0.1mg/L+3 0.1mg/L)	1093
Ctrl	1099.33		Acylcarnintine Mix (2 0.1mg/L+3 0.1mg/L)	1157.67
Ctrl	1030		Acylcarnintine Mix (2 0.1mg/L+3 0.1mg/L)	973.667
Ctrl	1050.67		Acylcarnintine Mix (2 0.1mg/L+3 0.1mg/L)	951.667
			Acylcarnintine Mix (2 0.1mg/L+3 0.1mg/L)	979.333
Ctrl	990.333		Acylcarnintine Mix (2 0.25mg/L+3 0.25mg/L)	854
Ctrl	1009		Acylcarnintine Mix (2 0.25mg/L+3 0.25mg/L)	1036
Ctrl	1125		Acylcarnintine Mix (2 0.25mg/L+3 0.25mg/L)	936
Ctrl	1021		Acylcarnintine Mix (2 0.25mg/L+3 0.25mg/L)	1081.33
Ctrl	919.667		Acylcarnintine Mix (2 0.25mg/L+3 0.25mg/L)	878.333
Ctrl	1076.67		Acylcarnintine Mix (2 0.25mg/L+3 0.25mg/L)	1111.67
Ctrl	981.667		Acylcarnintine Mix (2 0.25mg/L+3 0.25mg/L)	1132.33
Ctrl	985		Acylcarnintine Mix (2 0.25mg/L+3 0.25mg/L)	970.667
Ctrl	1021.67		Acylcarnintine Mix (2 0.25mg/L+3 0.25mg/L)	1037.67
Ctrl	1070		Acylcarnintine Mix (2 0.25mg/L+3 0.25mg/L)	1046.67
Ctrl	849.667		Acylcarnintine Mix (2 0.25mg/L+3 0.25mg/L)	903
Ctrl	1023.33		Acylcarnintine Mix (2 0.25mg/L+3 0.25mg/L)	1078
Ctrl	1107.67		Acylcarnintine Mix (2 0.25mg/L+3 0.25mg/L)	1020
Ctrl	1060.67		Acylcarnintine Mix (2 0.25mg/L+3 0.25mg/L)	978.333
Ctrl	1056		Acylcarnintine Mix (2 0.25mg/L+3 0.25mg/L)	1143.33
Ctrl	858.333		Acylcarnintine Mix (2 0.25mg/L+3 0.25mg/L)	1025.67
Ctrl	952.333		Acylcarnintine Mix (2 0.25mg/L+3 0.25mg/L)	1113
Ctrl	977.667		Acylcarnintine Mix (2 0.25mg/L+3 0.25mg/L)	1082.67
Ctrl	829		Acylcarnintine Mix (2 0.25mg/L+3 0.25mg/L)	1128
Ctrl	1047		Acylcarnintine Mix (2 0.25mg/L+3 0.25mg/L)	1120.67
Ctrl	1101		Acylcarnintine Mix (2 0.25mg/L+3 0.25mg/L)	1012
Ctrl	949.667		Acylcarnintine Mix (2 0.25mg/L+3 0.25mg/L)	893
Ctrl	860.667		Acylcarnintine Mix (2 0.25mg/L+3 0.25mg/L)	1117.67
Ctrl	832.333		Acylcarnintine Mix (2 0.25mg/L+3 0.25mg/L)	1142
Ctrl	689.333		Acylcarnintine Mix (2 0.25mg/L+3 0.25mg/L)	1179
Ctrl	773.333		Acylcarnintine Mix (2 0.25mg/L+3 0.25mg/L)	1127.33
Ctrl	1043.33		Acylcarnintine Mix (2 0.25mg/L+3 0.25mg/L)	1059.67
Ctrl	1080		Acylcarnintine Mix (2 0.25mg/L+3 0.25mg/L)	1038.67
Ctrl	1022		Acylcarnintine Mix (2 0.25mg/L+3 0.25mg/L)	1064.33
Ctrl	873		Acylcarnintine Mix (2 0.25mg/L+3 0.25mg/L)	1052.33
Ctrl	977.667		Acylcarnintine Mix (2 0.25mg/L+3 0.25mg/L)	1028
Ctrl	859.667		Acylcarnintine Mix (2 0.25mg/L+3 0.25mg/L)	1056
Ctrl	954.667		Acylcarnintine Mix (2 0.5mg/L+3 0.5mg/L)	1086.67
Ctrl	1136.67		Acylcarnintine Mix (2 0.5mg/L+3 0.5mg/L)	934.667
Ctrl	1012.33		Acylcarnintine Mix (2 0.5mg/L+3 0.5mg/L)	1157.67
Ctrl	957.667		Acylcarnintine Mix (2 0.5mg/L+3 0.5mg/L)	1059.67
Ctrl	1199.67		Acylcarnintine Mix (2 0.5mg/L+3 0.5mg/L)	877.333
Ctrl	1056.33		Acylcarnintine Mix (2 0.5mg/L+3 0.5mg/L)	1038.33
Ctrl	1135		Acylcarnintine Mix (2 0.5mg/L+3 0.5mg/L)	1088.67
Ctrl	1007.67		Acylcarnintine Mix (2 0.5mg/L+3 0.5mg/L)	1060.33
Ctrl	1169.67		Acylcarnintine Mix (2 0.5mg/L+3 0.5mg/L)	1088
Ctrl	1166.33		Acylcarnintine Mix (2 0.5mg/L+3 0.5mg/L)	1105.33
Ctrl	1113.33		Acylcarnintine Mix (2 0.5mg/L+3 0.5mg/L)	1095
Ctrl	992		Acylcarnintine Mix (2 0.5mg/L+3 0.5mg/L)	1035.33
Ctrl	1028		Acylcarnintine Mix (2 0.5mg/L+3 0.5mg/L)	1003
Ctrl	924.333		Acylcarnintine Mix (2 0.5mg/L+3 0.5mg/L)	991.667
Ctrl	1133.67		Acylcarnintine Mix (2 0.5mg/L+3 0.5mg/L)	1035
Ctrl	827		Acylcarnintine Mix (2 0.5mg/L+3 0.5mg/L)	1117
Ctrl	1022.33		Acylcarnintine Mix (2 0.5mg/L+3 0.5mg/L)	650
Ctrl	896.333		Acylcarnintine Mix (2 0.5mg/L+3 0.5mg/L)	1144
Ctrl	1188.33		Acylcarnintine Mix (2 0.5mg/L+3 0.5mg/L)	1064.33
Ctrl	923.333		Acylcarnintine Mix (2 0.5mg/L+3 0.5mg/L)	1076.33
Ctrl	907.667		Acylcarnintine Mix (2 0.5mg/L+3 0.5mg/L)	1078
Ctrl	1080		Acylcarnintine Mix (2 0.5mg/L+3 0.5mg/L)	1077.33
Ctrl	1105		Acylcarnintine Mix (2 0.5mg/L+3 0.5mg/L)	1046.33
Ctrl	1182.33		Acylcarnintine Mix (2 0.5mg/L+3 0.5mg/L)	1071.67
Ctrl	1071		Acylcarnintine Mix (2 0.5mg/L+3 0.5mg/L)	1063.33
Ctrl	1051		Acylcarnintine Mix (2 0.5mg/L+3 0.5mg/L)	885.667
Ctrl	1044.67		Acylcarnintine Mix (2 0.5mg/L+3 0.5mg/L)	869.333
Ctrl	968.667		Acylcarnintine Mix (2 0.5mg/L+3 0.5mg/L)	1185.67
Ctrl	979.333		Acylcarnintine Mix (2 0.5mg/L+3 0.5mg/L)	864.333
Ctrl	938.667		Acylcarnintine Mix (2 0.5mg/L+3 0.5mg/L)	1054
Ctrl	1012		Acylcarnintine Mix (2 0.5mg/L+3 0.5mg/L)	958
Ctrl	1074.33		Acylcarnintine Mix (2 0.5mg/L+3 0.5mg/L)	892
